# Supplementary material
Source: publisher figshare collection journal article supplement (https://acs.figshare.com/ndownloader/files/17502206)
Supplement: Supplementary file 1 [file 17502206]

# Ni-Catalyzed Enantioselective Intermolecular Hydroamination of Branched 1,3-Dienes Using Primary Aliphatic Amines

Gaël Tran, Wen Shao, Clément Mazet\*  
Department of Organic Chemistry, University of Geneva  
Quai Ernest Ansermet, 30 - 1211 Geneva 4, Switzerland  
[clement.mazet@unige.ch](mailto:clement.mazet@unige.ch)

## Table of Contents

|                                                                                                                                    |             |
|------------------------------------------------------------------------------------------------------------------------------------|-------------|
| <b>1. General information</b>                                                                                                      | <b>S2</b>   |
| <b>2. Reaction optimization</b>                                                                                                    | <b>S3</b>   |
| <b>3. General procedure for the amination reaction</b>                                                                             | <b>S5</b>   |
| <b>4. Substrate scope</b>                                                                                                          | <b>S6</b>   |
| 4.1. Diene scope                                                                                                                   | S6          |
| 4.2. Amine scope                                                                                                                   | S25         |
| <b>5. Rh-catalyzed deallylation of 3ap</b>                                                                                         | <b>S54</b>  |
| <b>6. Improved sets of reaction conditions</b>                                                                                     | <b>S56</b>  |
| <b>7. Supporting organometallics</b>                                                                                               | <b>S57</b>  |
| 7.1. NMR monitoring                                                                                                                | S57         |
| 7.2. Synthesis of [(L <sub>1</sub> ) <sub>2</sub> Ni] (7)                                                                          | S72         |
| 7.3. Synthesis of [(L <sub>1</sub> )Ni(cod)] (8)                                                                                   | S72         |
| 7.4. Synthesis of [(L <sub>1</sub> )Ni(1a)] (9)                                                                                    | S74         |
| 7.5. Synthesis of [(L <sub>1</sub> )Ni(η <sup>3</sup> -Allyl)][OCH <sub>2</sub> CF <sub>3</sub> ] (10)                             | S75         |
| 7.6. Synthesis of [(L <sub>1</sub> )Ni(3aa)] (11)                                                                                  | S76         |
| 7.7. Reaction of [(L <sub>1</sub> )Ni(η <sup>3</sup> -allyl)][OCH <sub>2</sub> CF <sub>3</sub> ] (10) with BnNH <sub>2</sub>       | S77         |
| <b>8. Amine exchange experiment</b>                                                                                                | <b>S80</b>  |
| <b>9. Deuterium labeling experiments</b>                                                                                           | <b>S81</b>  |
| 9.1. Model catalytic hydroamination using TFE- <i>d</i> <sub>1</sub> and BnND <sub>2</sub>                                         | S81         |
| 9.2. Post-reaction deuterium incorporation experiment                                                                              | S84         |
| 9.3. Synthesis of 10- <i>d</i> <sub>n</sub> using TFE- <i>d</i> <sub>1</sub> - <sup>2</sup> H NMR monitoring                       | S85         |
| 9.4. Synthesis of 10- <i>d</i> <sub>n</sub> using TFE- <i>d</i> <sub>1</sub> and BnND <sub>2</sub> - <sup>1</sup> H NMR monitoring | S86         |
| <b>10. Kinetic study</b>                                                                                                           | <b>S87</b>  |
| <b>11. BnNH<sub>2</sub> NMR titration by TFE</b>                                                                                   | <b>S92</b>  |
| <b>12. NMR Spectra of organic compounds</b>                                                                                        | <b>S94</b>  |
| <b>13. NMR Spectra of organometallic compounds</b>                                                                                 | <b>S147</b> |
| 2D NMR Analysis of Complex 10                                                                                                      | S163        |
| <b>14. X-Ray Analysis</b>                                                                                                          | <b>S170</b> |
| <b>15. References</b>                                                                                                              | <b>S172</b> |

## 1. General Information

Unless otherwise noted, all reactions were carried out under air. All liquid amines were distilled and degassed by three successive "freeze-pump-thaw" cycles, followed by drying over activated 4 Å MS. THF, Et<sub>2</sub>O, CH<sub>2</sub>Cl<sub>2</sub>, toluene, and pentane were degassed by N<sub>2</sub> bubbling and dried over activated alumina columns. Mesitylene was dried and distilled over CaH<sub>2</sub> and degassed by three successive "freeze-pump-thaw" cycles. Ni(cod)<sub>2</sub> was dissolved in toluene (ca. 1g/20mL), filtered over Celite, and recrystallized at –78 °C. Unless otherwise specified, all the dienes were prepared according to reported literature procedures.<sup>1</sup> All other reagents were purchased from Aldrich, Fluka, Acros or Strem and used without purification. NMR spectra were recorded on AMX–400 and AMX–500 Bruker Avance spectrometers at 298 K. <sup>1</sup>H and <sup>13</sup>C{<sup>1</sup>H} NMR chemical shifts are given in ppm relative to SiMe<sub>4</sub>, with the solvent resonance used as internal reference. <sup>1</sup>H NMR spectra were referenced to CHCl<sub>3</sub> (δ = 7.26 ppm), methanol (δ = 3.31 ppm) and toluene (δ = 6.98 ppm) and <sup>13</sup>C{<sup>1</sup>H} NMR spectra were referenced to CDCl<sub>3</sub> (δ = 77.16 ppm), methanol-*d*<sub>4</sub> (δ = 49.00 ppm) and toluene-*d*<sub>8</sub> (δ = 20.40 ppm). <sup>31</sup>P{<sup>1</sup>H} NMR chemical shifts are reported in ppm relative to H<sub>3</sub>PO<sub>4</sub>. <sup>19</sup>F{<sup>1</sup>H} NMR chemical shifts are reported in ppm relative to CFC<sub>3</sub>. Infrared spectra were obtained on a Perkin–Elmer 1650 FT-IR spectrometer using neat samples on a diamond ATR Golden Gate sampler. HRMS were obtained on a Xevo G2 ToF spectrometer (Ionization mode: ESI positive polarity; Mobile phase: MeOH 100 µl/min). Mass spectrum is calibrated by the use of the MS lockspray system (LeuEnk calibration solution). The enantiomeric excesses (ee's) were determined by HPLC, SFC and GC analyses. HPLC analyses were performed on a Shimadzu CTO-20AA with column DAICEL OD-H, OJ-H, AD-H and IC. SFC analyses were performed on a Waters Acquity UPC2 with columns OD-3, OJ-3, OZ-3, OB-H, AZ-3, AD, AS-3, AY-H. Retention times (t<sub>R</sub>) are given in minutes. GC analyses were performed on HP–6890, column HYDRODEX γ-DiMOM, HYDRODEX β-3P and HYDRODEX TBDM, 50 m. Optical rotations were recorded using an OMNI Lab JASCO P-1030 polarimeter using 589 nm emission band of a sodium lamp. Thin layer chromatography (TLC) was performed on plates of silica precoated with 0.25 mm Kieselgel 60 F<sub>254</sub> from Merck. Flash chromatography was performed using silica gel SiliaFlash® P60 (230-400 mesh) from Silicycle.

## 2. Reaction optimization

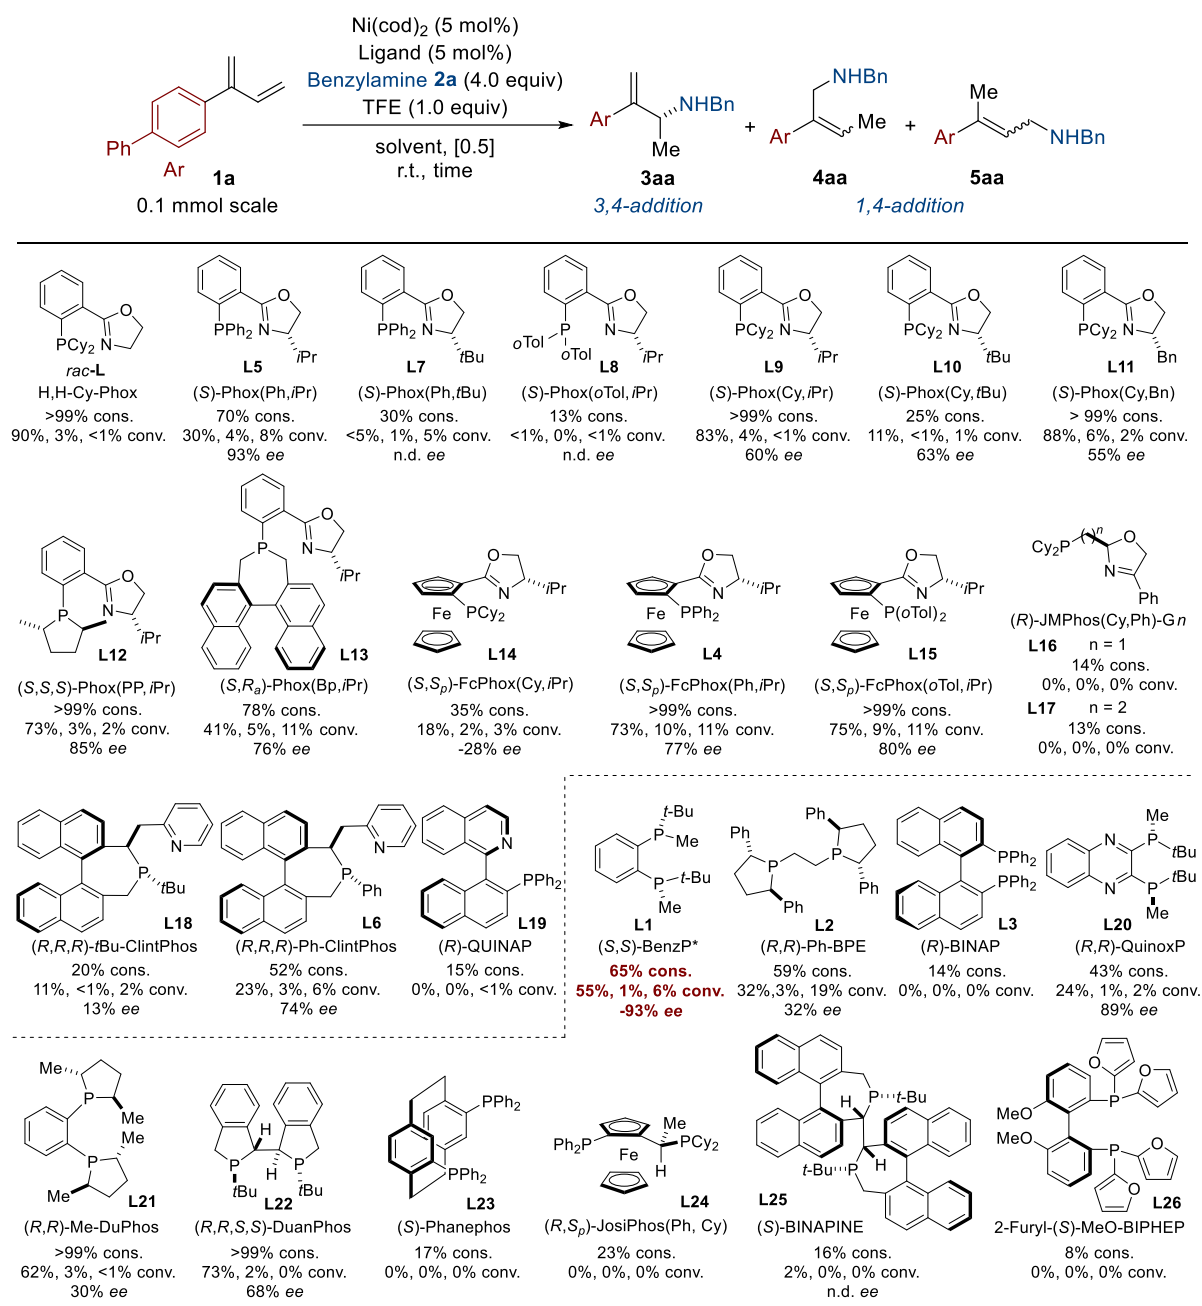

**Table S1: Ligand screening.** <sup>a</sup> Reaction conditions: all reactions were performed with diene **1a** (0.10 mmol, 1.0 equiv), benzylamine **2a** (0.40 mmol, 4.0 equiv),  $\text{Ni}(\text{cod})_2$  (0.005 mmol, 5 mol%), ligand (0.005 mmol, 5 mol%), 2,2,2-trifluoroethanol (0.10 mmol, 1.0 equiv) in mesitylene (0.20 mL, 0.5 M) at room temperature. Consumption of **1a**, conversions of **3aa**, **4aa** and **5aa** were assessed by  $^1\text{H}$  NMR of the crude reaction mixture using an internal standard. n.d. = not determined.

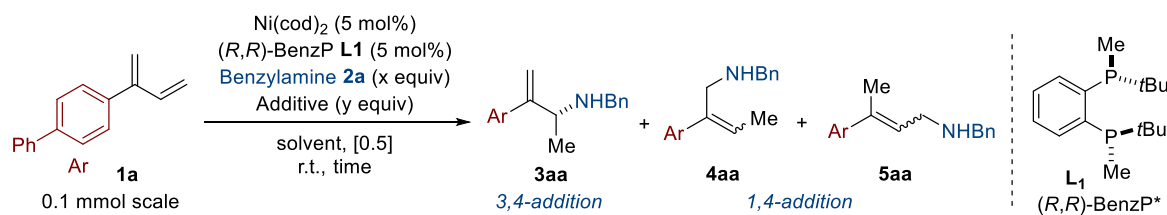

| Entry           | Solvent                         | Additive               | Time (h)  | x        | y        | <b>1a</b> Cons. (%) | <b>3aa</b> (%) | <b>4aa</b> (%) | <b>5aa</b> (%) | ee <b>3aa</b> (%) |
|-----------------|---------------------------------|------------------------|-----------|----------|----------|---------------------|----------------|----------------|----------------|-------------------|
| 1 <sup>b</sup>  | Mes.                            | TFE                    | 24        | 4        | 1        | 65                  | 55             | 1              | 6              | -93               |
| 2 <sup>b</sup>  | Mes.                            | TFE                    | 48        | 4        | 1        | >99                 | 72             | 2              | 8              | -93               |
| 3               | PhMe                            | TFE                    | 24        | 4        | 1        | 60                  | 52             | <1             | 8              | 91                |
| <b>4</b>        | <b>Mes.</b>                     | <b>TFE</b>             | <b>48</b> | <b>4</b> | <b>1</b> | <b>&gt;99</b>       | <b>79</b>      | <b>3</b>       | <b>11</b>      | <b>93</b>         |
| 5               | THF                             | TFE                    | 48        | 4        | 1        | 57                  | 43             | 2              | 4              | 95                |
| 6               | Et <sub>2</sub> O               | TFE                    | 48        | 4        | 1        | 46                  | 36             | 1              | 3              | 95                |
| 7               | Et <sub>2</sub> O               | TFE                    | 48        | 4        | 1        | >99                 | 74             | 2              | 8              | 93                |
| 8               | CH <sub>2</sub> Cl <sub>2</sub> | TFE                    | 48        | 4        | 1        | 8                   | 0              | 0              | 0              | --                |
| 9               | Mes.                            | TFE                    | 48        | 2        | 1        | 30                  | 17             | <1             | 2              | 86                |
| 10 <sup>c</sup> | Mes.                            | TFE                    | 24        | 4        | 1        | >99                 | 70             | 3              | 11             | 87                |
| 11              | Mes                             | EtOH                   | 24        | 4        | 1        | 4                   | 0              | 0              | 0              | --                |
| 12              | Mes.                            | Ph <sub>2</sub> P(O)OH | 24        | 4        | 1        | >99                 | 88             | 3              | 4              | 90                |
| 13              | Et <sub>2</sub> O               | Ph <sub>2</sub> P(O)OH | 24        | 4        | 1        | 80                  | 72             | 2              | 2              | 83                |
| 14              | Mes.                            | Ph <sub>2</sub> P(O)OH | 48        | 2        | 1        | >99                 | 84             | 3              | 3              | 88                |
| 15              | Mes.                            | Ph <sub>2</sub> P(O)OH | 48        | 4        | 0.2      | >99                 | 92             | 3              | 4              | 91                |
| 16              | Mes.                            | Ph <sub>2</sub> P(O)OH | 48        | 2        | 0.2      | >99                 | 90             | 3              | 2              | 91                |

**Table S2: Other condition optimization.** <sup>a</sup> Reaction conditions: all reactions were performed with diene **1a** (0.10 mmol, 1.0 equiv), benzylamine **2a** (0.40 mmol, 4.0 equiv or 0.20 mmol, 2.0 equiv),  $\text{Ni}(\text{cod})_2$  (0.005 mmol, 5 mol%),  $(R,R)\text{-BenzP}^*$  **L1** (0.005 mmol, 5 mol%), 2,2,2-trifluoroethanol (0.10 mmol, 1.0 equiv) or diphenylphosphonic acid (0.10 mmol, 1.0 equiv or 0.020 mmol, 0.20 equiv) in solvent (0.20 mL, 0.5 M) at room temperature. Consumption of **1a** and conversions were assessed by <sup>1</sup>H NMR of the crude reaction mixture using an internal standard. <sup>b</sup> Using  $(S,S)\text{-BenzP}^*$  as ligand. <sup>c</sup> At 40 °C. Mes. = mesitylene, THF = tetrahydrofuran, TFE = 2,2,2-trifluoroethanol.



### 3. General procedure for the amination reaction

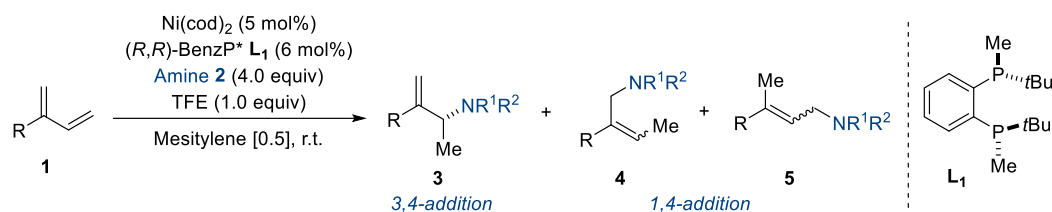

In a N<sub>2</sub>-filled glovebox, Ni(cod)<sub>2</sub> (0.0125 mmol, 3.4 mg, 5 mol%) and (*R,R*)-BenzP\* **L**<sub>1</sub> (0.015 mmol, 4.2 mg, 6 mol%) were charged in a 5 mL Schlenk tube and dissolved in anhydrous mesitylene (0.50 mL, 0.50 M). After stirring at room temperature for 10 min, the appropriate diene **1** (0.25 mmol, 1.0 equiv), the appropriate amine **2** (1.00 mmol, 4.0 equiv) and TFE (0.25 mmol, 19 μL, 1.0 equiv) were added sequentially. The tube was sealed, taken out of the glovebox and the reaction mixture was stirred at room temperature. After complete consumption of diene **1** (determined by TLC), the reaction mixture was filtered over a short pad of silica gel, washed with ethyl acetate (10 mL) and concentrated under vacuum to afford the crude mixture. The conversion and isomeric ratio were determined by <sup>1</sup>H NMR analysis of the crude reaction mixture using CH<sub>2</sub>Br<sub>2</sub> as an internal standard. The residue was purified by silica gel column chromatography to afford the analytically pure hydroamination product **3**.

*Note: All racemates were prepared according to a similar procedure using H,H-Cy-Phox rac-L as ligand (mesitylene [0.5], room temperature, 24 h).*

## 4. Substrate scope

### 4.1 Scope in diene

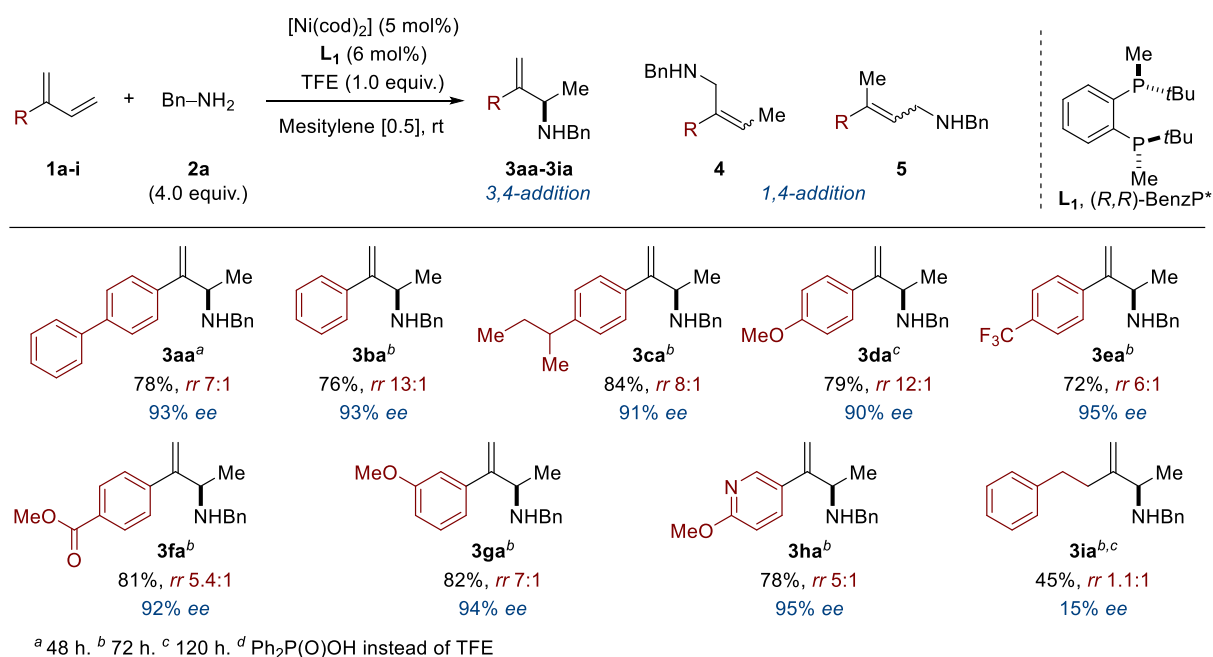

**Figure S1. Scope of the Ni-catalyzed hydroamination of 2-substituted 1,3-dienes - Variation of the diene component.** 0.25-0.40 mmol scale. Yields of 3,4-addition product after purification. Regioselectivity expressed as the ratio between 3,4- and 1,4-addition products as determined by <sup>1</sup>H NMR using an internal standard (3:[4+5]). Enantiomeric excess determined by GC or HPLC equipped with chiral columns. <sup>a</sup> 48 h. <sup>b</sup> 72 h. <sup>c</sup> 120 h.

**(R)-3-([1,1'-Biphenyl]-4-yl)-N-benzylbut-3-en-2-amine 3aa**

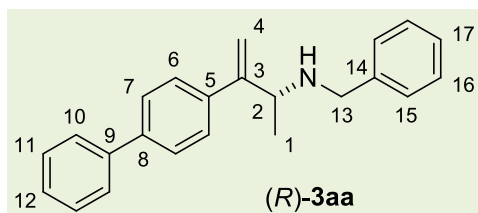

Synthesized at room temperature for 48 h following the general procedure using 4-(buta-1,3-dien-2-yl)-1,1'-biphenyl **1a** (51.6 mg, 0.25 mmol, 1.0 equiv), benzylamine **2a** (109  $\mu$ L, 1.00 mmol, 4.0 equiv), Ni(cod)<sub>2</sub> (3.4 mg, 0.0125 mmol, 5 mol%), (R,R)-

BenzP\* (4.2 mg, 0.015 mmol, 6 mol%), 2,2,2-trifluoroethanol (19  $\mu$ L, 0.25 mmol, 1.0 equiv) and mesitylene (0.50 mL, 0.5 M). Consumption of **1a**: >99%, conversion of **3aa**: 79%, *r.r.* = 7:1. Purification by flash chromatography over silica gel (pentane:EtOAc = 5:1) led to the desired product as a yellow solid (61.1 mg, 78% yield, 93% ee).

**<sup>1</sup>H NMR** (400 MHz, CDCl<sub>3</sub>)  $\delta$  (ppm) = 7.63 (d, <sup>3</sup>J<sub>HH</sub> = 7.4 Hz, 2H, *H*-10), 7.58 (d, <sup>3</sup>J<sub>HH</sub> = 8.2 Hz, 2H, *H*-7), 7.52 – 7.43 (m, 4H, *H*-6+*H*-11), 7.40 – 7.25 (m, 6H, *H*-12+*H*-15+*H*-16+*H*-17), 5.40 (s, 1H, *H*-4), 5.38 (s, 1H, *H*-4), 3.91 (d, <sup>2</sup>J<sub>HH</sub> = 13.1 Hz, 1H, *H*-13), 3.86 – 3.73 (m, 2H, *H*-13'+*H*-2), 1.65 (s, 1H, NH), 1.29 (d, <sup>3</sup>J<sub>HH</sub> = 6.6 Hz, 3H, *H*-1).

**<sup>13</sup>C{<sup>1</sup>H} NMR** (100 MHz, CDCl<sub>3</sub>)  $\delta$  (ppm) = 151.5 (C-3), 140.9 (C-9), 140.7 (C-14), 140.3 (C-8), 140.2 (C-5), 128.9 (CH-11), 128.5 (CH-16), 128.4 (CH-15), 127.5 (CH-6), 127.4 (C-12), 127.14 (CH-10), 127.06 (CH-7+CH-17), 113.0 (CH<sub>2</sub>-4), 56.7 (CH-2), 51.5 (CH<sub>2</sub>-13), 21.8 (CH<sub>3</sub>-1).

**m.p.** = 44.2 – 46.0 °C.

**HRMS** (ESI<sup>+</sup>): calculated [M+H]<sup>+</sup> for C<sub>23</sub>H<sub>24</sub>N<sup>+</sup>: 314.1904; found: 314.1939.

**IR** (neat)  $\nu$  (cm<sup>-1</sup>): 3025, 2924, 2853, 1623, 1487, 1452, 1369, 1152, 1120, 1077, 1004, 916, 841, 771, 740, 694.

**HPLC**: 93% ee, chiral stationary column: OD-H, mobile phase: hexane/*i*PrOH = 97/3, 1.0 mL/min, 254 nm, 30 °C, *t*<sub>R</sub> (major) = 7.2 min, *t*<sub>R</sub> (minor) = 15.7 min.

**[ $\alpha$ ]<sup>20</sup><sub>D</sub>** = +7.0 (*c* 1.0, CHCl<sub>3</sub>).

### <Chromatogram>

mAU

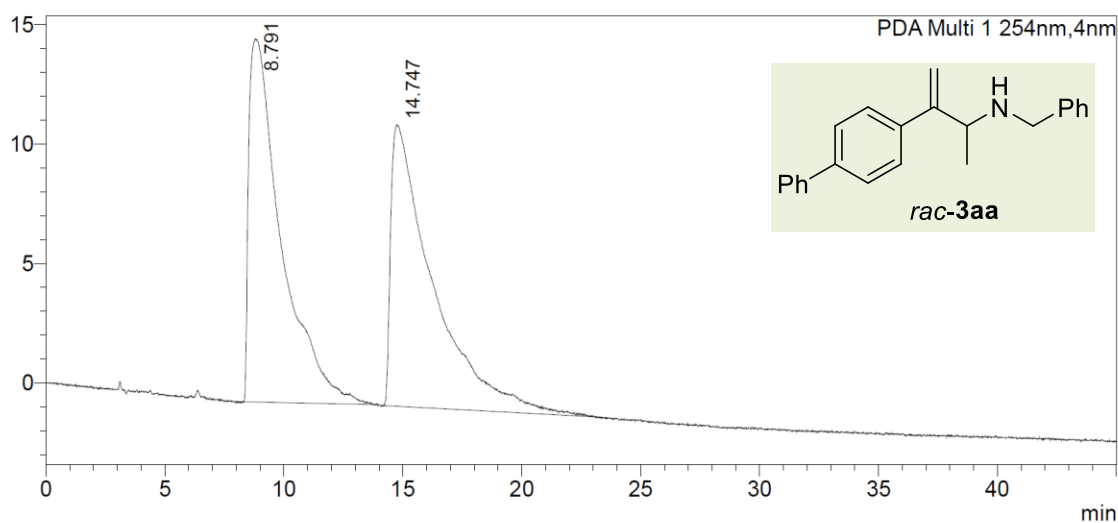

### <Peak Table>

PDA Ch1 254nm

| Peak# | Ret. Time | Area%   |
|-------|-----------|---------|
| 1     | 8.791     | 49.954  |
| 2     | 14.747    | 50.046  |
| Total |           | 100.000 |

### <Chromatogram>

mAU

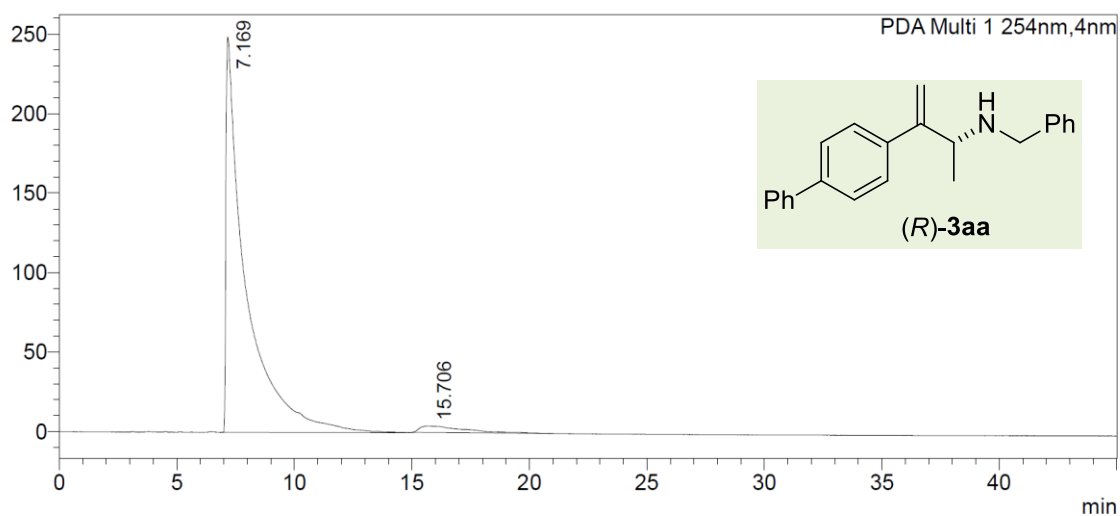

### <Peak Table>

PDA Ch1 254nm

| Peak# | Ret. Time | Area%   |
|-------|-----------|---------|
| 1     | 7.169     | 96.402  |
| 2     | 15.706    | 3.598   |
| Total |           | 100.000 |

### (*R*)-*N*-Benzyl-3-phenylbut-3-en-2-amine **3ba**

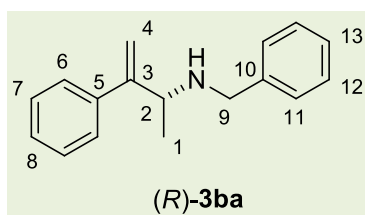

Synthesized at room temperature for 72 h following the general procedure using buta-1,3-dien-2-ylbenzene **1b** (33.0 mg, 0.25 mmol, 1.0 equiv), benzylamine **2a** (109  $\mu$ L, 1.00 mmol, 4.0 equiv), Ni(cod)<sub>2</sub> (3.4 mg, 0.0125 mmol, 5 mol%), (*R,R*)-BenzP\* (4.2 mg, 0.015 mmol, 6 mol%), 2,2,2-trifluoroethanol (19  $\mu$ L,

0.25 mmol, 1.0 equiv) and mesitylene (0.50 mL, 0.5 M). Consumption of **1b**: >95%, conversion of **3ba**: 76%, *r.r.* = 13:1. Purification by flash chromatography over silica gel (pentane:EtOAc = 4:1) led to the desired product as a pale yellow oil (45.0 mg, 76% yield, 93% *ee*).

**<sup>1</sup>H NMR** (500 MHz, CDCl<sub>3</sub>)  $\delta$  (ppm) = 7.41 – 7.36 (m, 2H, H-Ar), 7.35 – 7.22 (m, 8H, H-Ar), 5.35 – 5.29 (m, 2H, H-4), 3.87 (d, <sup>2</sup>*J*<sub>HH</sub> = 13.1 Hz, 1H, H-9), 3.81 – 3.72 (m, 2H, H-9 + H-2), 1.51 (s, 1H, NH), 1.23 (d, <sup>3</sup>*J*<sub>HH</sub> = 6.6 Hz, 3H, H-1).

**<sup>13</sup>C{<sup>1</sup>H} NMR** (130 MHz, CDCl<sub>3</sub>)  $\delta$  (ppm) = 152.0 (C-3), 141.4 (C-5), 140.8 (C-10), 128.5 (CH-Ar), 128.3 (2xCH-Ar), 127.5 (CH-8), 127.2 (CH-12), 127.0 (CH-13), 112.9 (CH<sub>2</sub>-4), 56.8 (CH-2), 51.5 (CH<sub>2</sub>-9), 21.8 (CH<sub>3</sub>-1).

**HRMS** (ESI<sup>+</sup>): calculated [M+H]<sup>+</sup> for C<sub>17</sub>H<sub>20</sub>N<sup>+</sup>: 238.1591; found: 238.1590.

**IR** (neat)  $\nu$  (cm<sup>-1</sup>): 3027, 2967, 2929, 1627, 1600, 1493, 1452, 1369, 1315, 1150, 1072, 1027, 906, 778, 734, 695.

**Chiral GC**: 93% *ee*, chiral stationary column: Hydrodex  $\gamma$ -DiMOM, mobile phase: H<sub>2</sub> (45 cm/s), temperature gradient: 145 °C isothermal, *t*<sub>R</sub> (minor) = 153.5 min, *t*<sub>R</sub> (major) = 155.1 min.

**[ $\alpha$ ]<sup>20</sup><sub>D</sub>** = +3.1 (*c* 0.47, CH<sub>2</sub>Cl<sub>2</sub>).

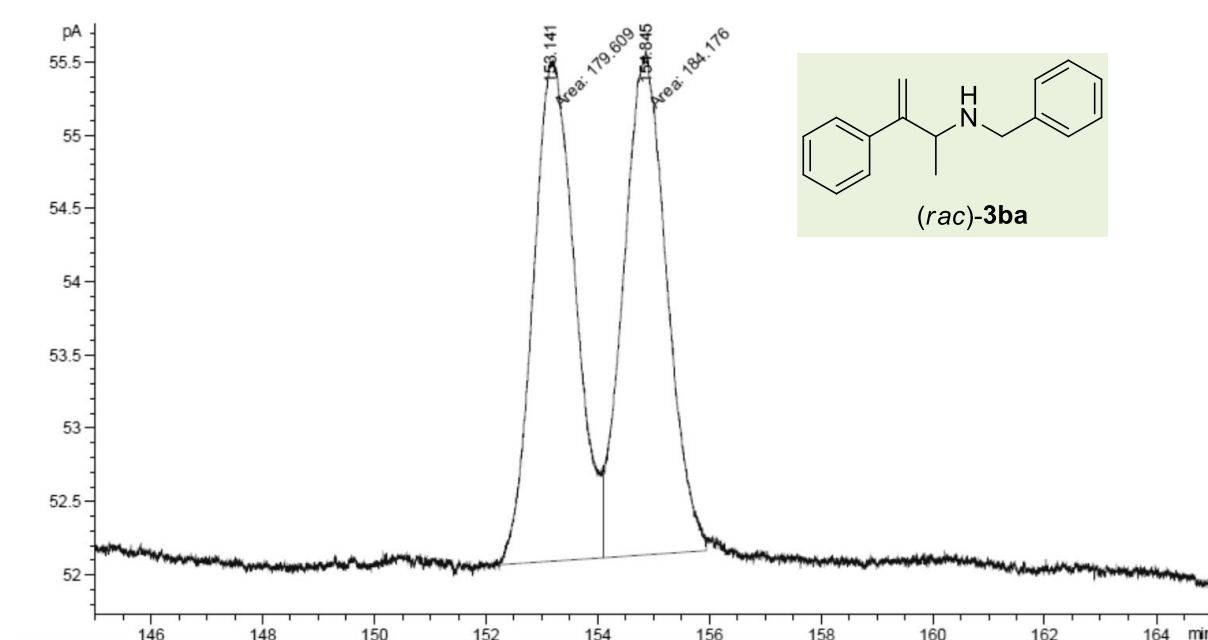

| Peak # | RetTime [min] | Type | Width [min] | Area [pA*s] | Height [pA] | Area %   |
|--------|---------------|------|-------------|-------------|-------------|----------|
| 1      | 153.141       | MF   | 0.8752      | 179.60921   | 3.42030     | 49.37236 |
| 2      | 154.845       | FM   | 0.8907      | 184.17572   | 3.44632     | 50.62764 |

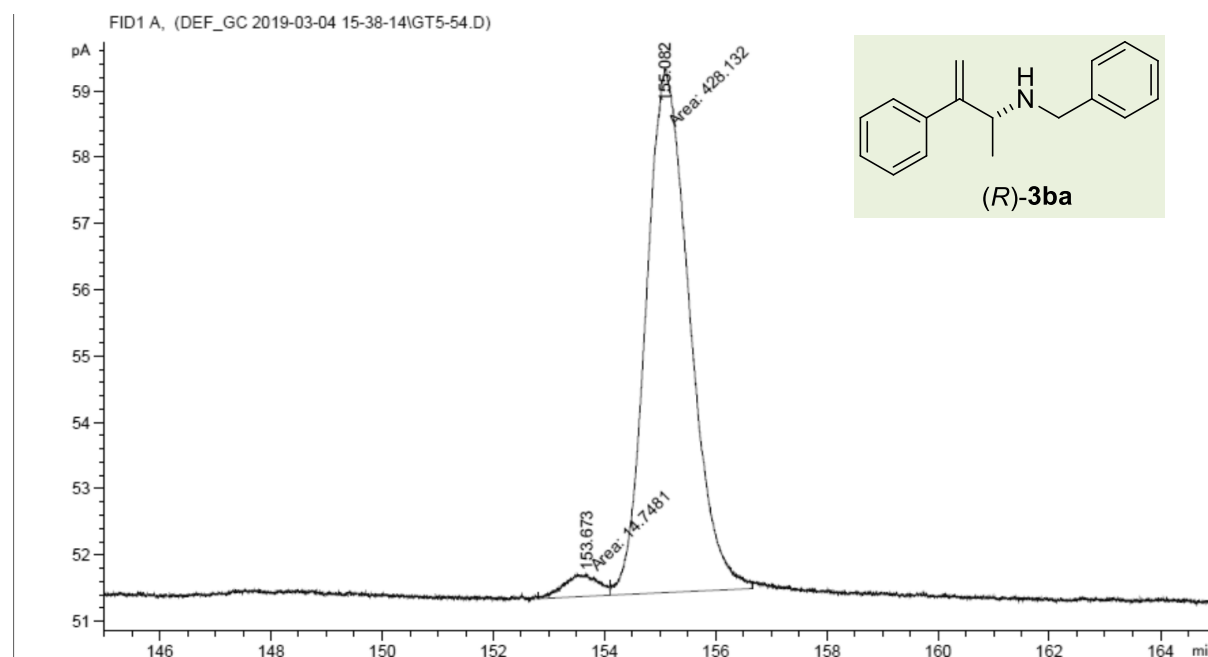

| Peak # | RetTime [min] | Type | Width [min] | Area [pA*s] | Height [pA] | Area %   |
|--------|---------------|------|-------------|-------------|-------------|----------|
| 1      | 153.673       | MF   | 0.7300      | 14.74808    | 3.36736e-1  | 3.33004  |
| 2      | 155.082       | FM   | 0.9025      | 428.13214   | 7.90634     | 96.66996 |

**(*R*)-*N*-Benzyl-3-(4-isobutylphenyl)but-3-en-2-amine 3ca**

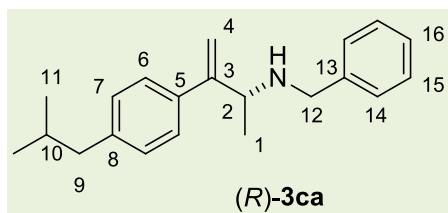

Synthesized at room temperature for 48 h following the general procedure using 1-(buta-1,3-dien-2-yl)-4-isobutylbenzene **1c** (75.0 mg, 0.40 mmol, 1.0 equiv), benzylamine **2a** (175  $\mu$ L, 1.60 mmol, 4.0 equiv), Ni(cod)<sub>2</sub> (5.5 mg, 0.020 mmol, 5 mol%), (*R,R*)-BenzP\* (6.8 mg,

0.024 mmol, 6 mol%), 2,2,2-trifluoroethanol (29  $\mu$ L, 0.40 mmol, 1.0 equiv) and mesitylene (0.80 mL, 0.5 M). Consumption of **1c**: >95%, conversion of **3ca**: 84%, *r.r.* = 8:1. Purification by flash chromatography over silica gel (pentane:EtOAc = 4:1) led to the desired product as a pale yellow oil (99.0 mg, 84% yield, 91% ee).

**<sup>1</sup>H NMR** (500 MHz, CDCl<sub>3</sub>)  $\delta$  (ppm) = 7.34 – 7.27 (m, 6H, H-15 + H-14 + H-6), 7.26 – 7.22 (m, 1H, H-16), 7.10 (d, <sup>3</sup>*J*<sub>HH</sub> = 8.1 Hz, 2H, H-7), 5.33 – 5.28 (m, 2H, H-4), 3.85 (d, <sup>2</sup>*J*<sub>HH</sub> = 13.1 Hz, 1H, H-12), 3.79 – 3.71 (m, 2H, H-2 + H-12), 2.47 (d, <sup>3</sup>*J*<sub>HH</sub> = 7.2 Hz, 3H, H-9), 1.87 (hept<sub>app</sub>, <sup>3</sup>*J*<sub>HH</sub> = 6.6 Hz, 1H, H-10), 1.52 (s, 1H, N-H), 1.24 (d, <sup>3</sup>*J*<sub>HH</sub> = 6.6 Hz, 3H, H-1), 0.92 (d, <sup>3</sup>*J*<sub>HH</sub> = 6.6 Hz, 6H, H-11)

**<sup>13</sup>C{<sup>1</sup>H} NMR** (130 MHz, CDCl<sub>3</sub>)  $\delta$  (ppm) = 151.9 (C-3), 141.1 (C-8), 140.9 (C-13), 129.1 (C-5), 128.5 (CH-Ar), 128.4 (CH-Ar), 1267.0 (CH-16), 126.8 (CH-Ar), 112.2 (CH<sub>2</sub>-4), 56.7 (CH-2), 51.5 (CH<sub>2</sub>-12), 45.2 (CH<sub>2</sub>-9), 30.4 (CH-10), 22.6 (CH<sub>3</sub>-11), 21.8 (CH<sub>3</sub>-1).

**HRMS** (ESI<sup>+</sup>): calculated [M+H]<sup>+</sup> for C<sub>21</sub>H<sub>28</sub>N<sup>+</sup>: 294.2217; found: 294.2247.

**IR** (neat)  $\nu$  (cm<sup>-1</sup>): 3026, 2955, 1625, 1510, 1495, 1454, 1367, 1151, 1120, 906, 847, 801, 731, 697.

**HPLC**: 91% ee, chiral stationary column: AD-H, mobile phase: hexane/*i*PrOH = 99/1, 1.0 mL/min, 254 nm, 30 °C, *t*<sub>R</sub> (minor) = 5.3 min, *t*<sub>R</sub> (major) = 5.9 min.

**[ $\alpha$ ]<sup>20</sup><sub>D</sub>** = +2.8 (*c* 0.74, CHCl<sub>3</sub>).

# <Chromatogram>

mAU

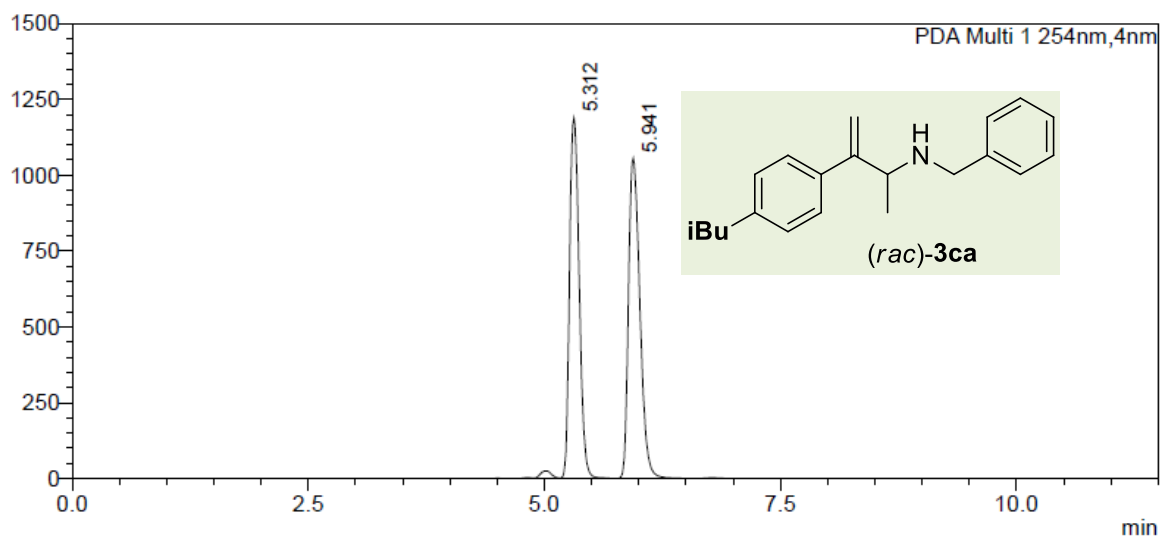

PDA Ch1 254nm

| Peak# | Ret. Time | Area%   |
|-------|-----------|---------|
| 1     | 5.312     | 48.725  |
| 2     | 5.941     | 51.275  |
| Total |           | 100.000 |

# <Chromatogram>

mAU

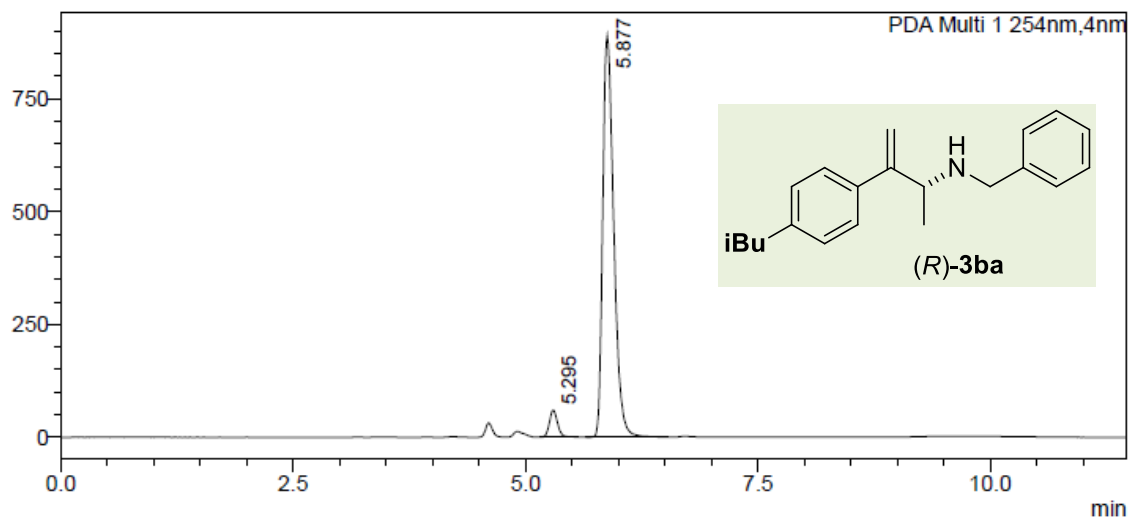

# <Peak Table>

PDA Ch1 254nm

| Peak# | Ret. Time | Area%   |
|-------|-----------|---------|
| 1     | 5.295     | 4.721   |
| 2     | 5.877     | 95.279  |
| Total |           | 100.000 |



**(*R*)-*N*-Benzyl-3-(4-methoxyphenyl)but-3-en-2-amine 3da**

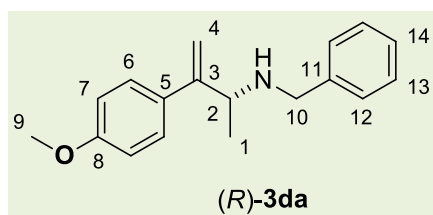

Synthesized at room temperature for 120 h following the general procedure using 1-(buta-1,3-dien-2-yl)-4-methoxybenzene **1d** (40.0 mg, 0.25 mmol, 1.0 equiv), benzylamine **2a** (110  $\mu$ L, 1.00 mmol, 4.0 equiv), Ni(cod)<sub>2</sub> (3.4 mg, 0.0125 mmol, 5 mol%), (*R,R*)-BenzP\* (4.2 mg, 0.015 mmol, 6 mol%), 2,2,2-trifluoroethanol (19  $\mu$ L, 0.25 mmol, 1.0 equiv) and mesitylene (0.50 mL, 0.5 M). Consumption of **1d**: 91%, conversion of **3da**: 81%, *r.r.* = 12:1. Purification by flash chromatography over silica gel (pentane:EtOAc = 3:2) led to the desired product as a pale yellow oil (52.0 mg, 79% yield, 90% ee).

**<sup>1</sup>H NMR** (500 MHz, CDCl<sub>3</sub>)  $\delta$  (ppm) = 7.37 – 7.29 (m, 6H, H-6 + H-12 + H-13), 7.26 – 7.22 (m, 1H, H-14), 6.88 – 6.83 (m, 2H, H-7), 5.26 – 5.24 (m, 2H, H-4), 3.85 (d, <sup>2</sup>*J*<sub>HH</sub> = 13.1 Hz, 1H, H-10), 3.82 (s, 3H, H-9), 3.76 (d, <sup>2</sup>*J*<sub>HH</sub> = 13.1 Hz, 1H, H-10), 3.72 (q, <sup>3</sup>*J*<sub>HH</sub> = 6.6 Hz, 1H, H-2), 1.53 (s, 1H, N-*H*), 1.23 (d, <sup>3</sup>*J*<sub>HH</sub> = 6.6 Hz, 3H, H-1).

**<sup>13</sup>C{<sup>1</sup>H} NMR** (130 MHz, CDCl<sub>3</sub>)  $\delta$  (ppm) = 159.2 (C-8), 151.3 (C-3), 140.9 (C-11), 133.7 (C-5), 128.5 (CH-*Ar*), 128.3 (CH-*Ar*), 128.2 (CH-*Ar*), 127.0 (CH-14), 113.7 (CH<sub>2</sub>-7), 111.7 (CH-4), 56.8 (CH-2), 55.4 (CH<sub>3</sub>-9), 51.5 (CH<sub>2</sub>-10), 21.7 (CH<sub>3</sub>-1).

**HRMS** (ESI<sup>+</sup>): calculated [M+H]<sup>+</sup> for C<sub>18</sub>H<sub>22</sub>NO<sup>+</sup>: 268.1696; found: 268.1731.

**IR** (neat)  $\nu$  (cm<sup>-1</sup>): 3029, 2928, 1607, 1509, 1454, 1369, 1292, 1243, 1179, 1150, 1113, 1032, 903, 834, 733, 697.

**HPLC**: 90% ee, chiral stationary column: AD-H, mobile phase: hexane/*i*PrOH = 98/2, 1.0 mL/min, 290 nm, 30 °C, *t*<sub>R</sub> (minor) = 6.0 min, *t*<sub>R</sub> (major) = 6.6 min.

**[ $\alpha$ ]<sup>20</sup><sub>D</sub>** = +4.2 (c 1.0, CH<sub>2</sub>Cl<sub>2</sub>).

### <Chromatogram>

mAU

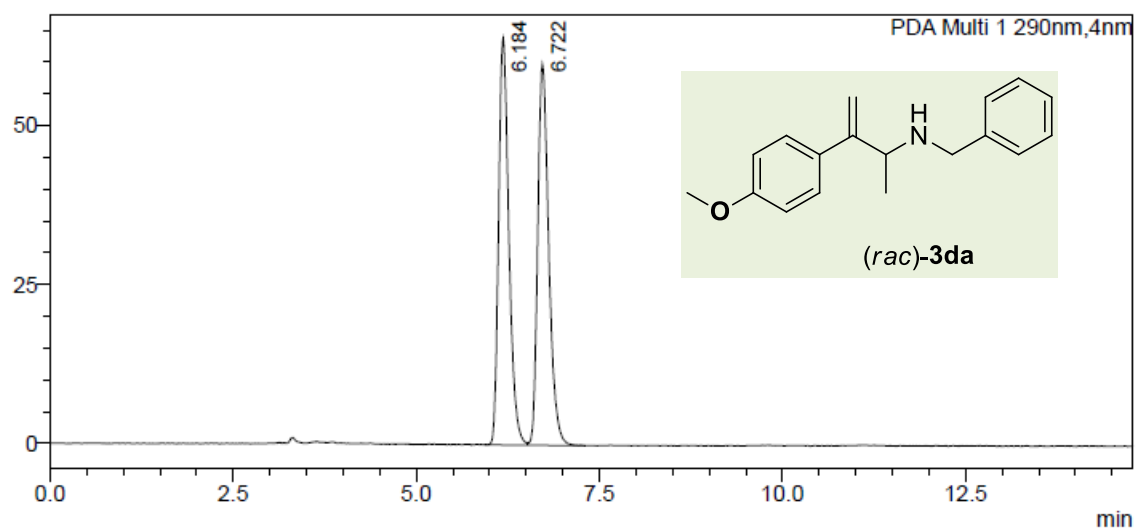

### <Peak Table>

PDA Ch1 290nm

| Peak# | Ret. Time | Area%   |
|-------|-----------|---------|
| 1     | 6.184     | 49.908  |
| 2     | 6.722     | 50.092  |
| Total |           | 100.000 |

### <Chromatogram>

mAU

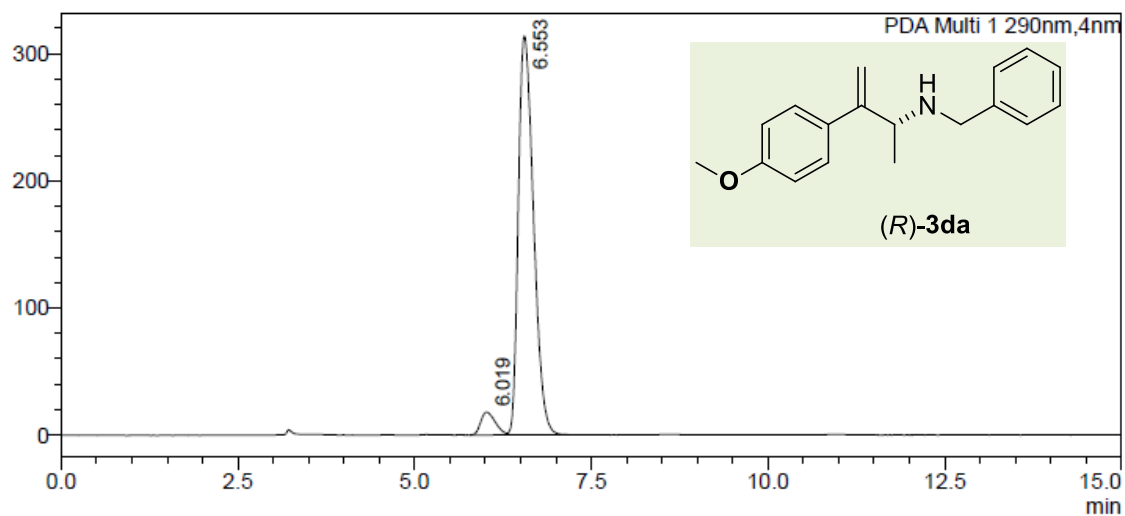

### <Peak Table>

PDA Ch1 290nm

| Peak# | Ret. Time | Area%   |
|-------|-----------|---------|
| 1     | 6.019     | 5.266   |
| 2     | 6.553     | 94.734  |
| Total |           | 100.000 |

**(R)-N-Benzyl-3-(4-(trifluoromethyl)phenyl)but-3-en-2-amine 3ea**

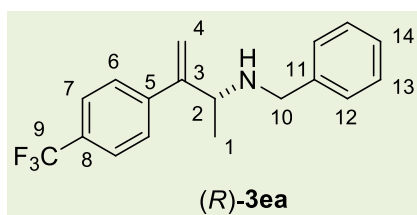

Synthesized at room temperature for 72 h following the general procedure using 1-(buta-1,3-dien-2-yl)-4-(trifluoromethyl)benzene **1e** (50.0 mg, 0.25 mmol, 1.0 equiv), benzylamine **2a** (110  $\mu$ L, 1.00 mmol, 4.0 equiv), Ni(cod)<sub>2</sub> (3.4 mg, 0.0125 mmol, 5 mol%), (R,R)-BenzP\* (4.2 mg, 0.015 mmol, 6 mol%), 2,2,2-trifluoroethanol (19  $\mu$ L, 0.25 mmol, 1.0 equiv) and mesitylene (0.50 mL, 0.5 M). Consumption of **1e**: >95%, conversion of **3ea**: 83%, *r.r.* = 6:1.

Purification by flash chromatography over silica gel (pentane:EtOAc = 4:1) led to the desired product as a pale yellow oil (59.0 mg, 77% yield, 95% *ee*).

**<sup>1</sup>H NMR** (500 MHz, CDCl<sub>3</sub>)  $\delta$  (ppm) = 7.57 (d, <sup>3</sup>*J*<sub>HH</sub> = 8.2 Hz, 2H, H-7), 7.51 (d, <sup>3</sup>*J*<sub>HH</sub> = 8.2 Hz, 2H, H-6), 7.35 – 7.28 (m, 4H, H-12 + H-13), 7.27 – 7.22 (m, 1H, H-14), 5.41 (t, <sup>2</sup>*J*<sub>HH</sub> = 1.1 Hz, 2H, H-4), 5.35 (d, <sup>2</sup>*J*<sub>HH</sub> = 1.1 Hz, 1H, H-4), 3.87 (d, <sup>2</sup>*J*<sub>HH</sub> = 13.2 Hz, 1H, H-10), 3.81 – 3.70 (m, 2H, H-10 + H-2), 1.44 (s, 1H, N-H), 1.22 (d, <sup>3</sup>*J*<sub>HH</sub> = 6.6 Hz, 3H, H-1).

**<sup>13</sup>C{<sup>1</sup>H} NMR** (130 MHz, CDCl<sub>3</sub>)  $\delta$  (ppm) = 151.3 (C-3), 145.1 (C-5), 140.8 (C-11), 129.7 (<sup>2</sup>*J*<sub>CF</sub>, q, *J* = 32 Hz, C-8), 128.6 (CH-Ar), 128.3 (CH-Ar), 127.7 (C H-6), 127.1 (CH-14), 125.2 (<sup>3</sup>*J*<sub>CF</sub>, *J* = 4 Hz, CH-7), 124.5 (q, <sup>1</sup>*J*<sub>CF</sub> = 272 Hz, C-9), 57.2 (CH-2), 51.6 (CH<sub>2</sub>-10), 21.7 (CH<sub>3</sub>-1).

**<sup>19</sup>F{<sup>1</sup>H} NMR** (280 MHz, CDCl<sub>3</sub>)  $\delta$  (ppm) = -62.49.

**HRMS** (ESI<sup>+</sup>): calculated [M+H]<sup>+</sup> for C<sub>18</sub>H<sub>19</sub>F<sub>3</sub>N<sup>+</sup>: 306.1465; found: 306.1461.

**IR** (neat)  $\nu$  (cm<sup>-1</sup>): 3030, 2970, 1616, 1495, 1453, 1404, 1372, 1322, 1163, 1118, 1065, 1015, 915, 846, 735, 698.

**Chiral GC**: 95% *ee*, chiral stationary column: Hydrodex  $\beta$ -3P, mobile phase: H<sub>2</sub> (45 cm/s), temperature gradient: 130 °C isothermal, *t*<sub>R</sub> (minor) = 90.9 min, *t*<sub>R</sub> (major) = 93.1 min.

**[ $\alpha$ ]<sup>20</sup><sub>D</sub>** = +6.6 (*c* 1.34, CH<sub>2</sub>Cl<sub>2</sub>).

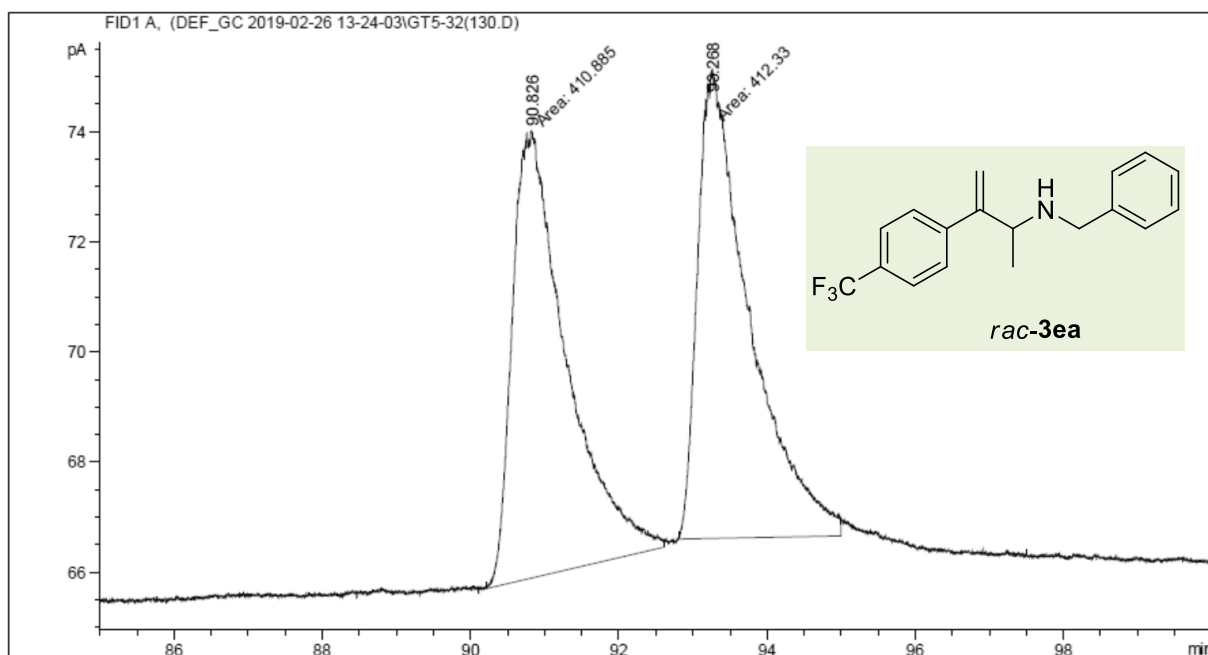

| Peak # | RetTime [min] | Type | Width [min] | Area [pA*s] | Height [pA] | Area %   |
|--------|---------------|------|-------------|-------------|-------------|----------|
| 1      | 90.826        | MM   | 0.8414      | 410.88467   | 8.13883     | 49.91219 |
| 2      | 93.268        | MM   | 0.8040      | 412.33047   | 8.54738     | 50.08781 |

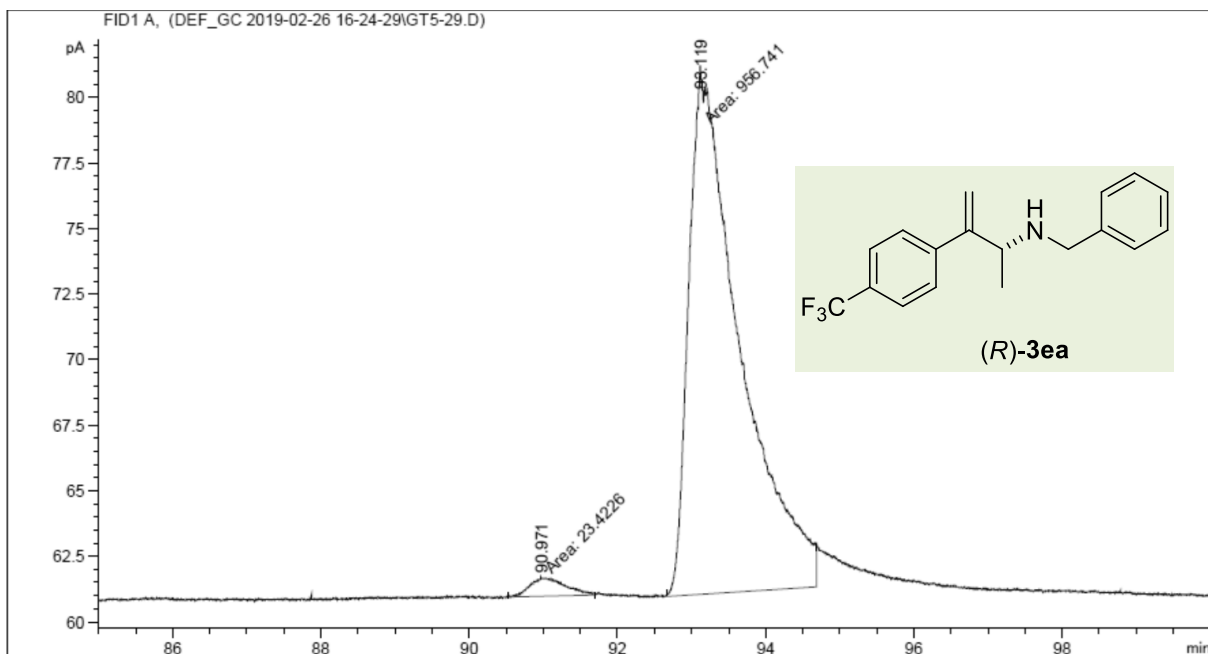

| Peak # | RetTime [min] | Type | Width [min] | Area [pA*s] | Height [pA] | Area %   |
|--------|---------------|------|-------------|-------------|-------------|----------|
| 1      | 90.971        | MM   | 0.5384      | 23.42261    | 7.25067e-1  | 2.38966  |
| 2      | 93.119        | MM   | 0.7920      | 956.74139   | 20.13446    | 97.61034 |

**(*R*)-*N*-Benzyl-3-(3-methoxyphenyl)but-3-en-2-amine 3fa**

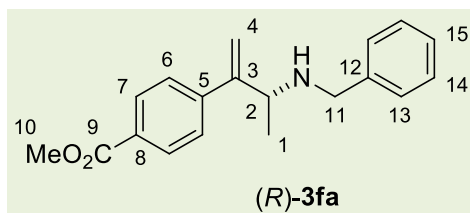

Synthesized at room temperature for 72 h following the general procedure using methyl 4-(buta-1,3-dien-2-yl)benzoate **1f** (47.0 mg, 0.25 mmol, 1.0 equiv), benzylamine **2a** (110  $\mu$ L, 1.00 mmol, 4.0 equiv), Ni(cod)<sub>2</sub> (3.4 mg, 0.0125 mmol, 5 mol%), (*R,R*)-BenzP\* (4.2 mg, 0.015 mmol, 6 mol%), 2,2,2-trifluoroethanol (19  $\mu$ L, 0.25 mmol, 1.0 equiv) and mesitylene (0.50 mL, 0.5 M). Consumption of **1f**: >95%, conversion of **3fa**: 85%, *r.r.* = 5.4:1. Purification by flash chromatography over silica gel (pentane:EtOAc = 4:1) led to the desired product as a pale yellow oil (60.0 mg, 81% yield, 92% *ee*).

**<sup>1</sup>H NMR** (500 MHz, CDCl<sub>3</sub>)  $\delta$  (ppm) = 8.01 – 7.95 (m, 2H, H-7), 7.46 (d, <sup>3</sup>*J*<sub>HH</sub> = 8.4 Hz, 2H, H-6), 7.36 – 7.29 (m, 4H, H-13 + H-14), 7.28 – 7.22 (m, 1H, H-15), 5.42 (s, 1H, H-4), 5.39 (s, 1H, H-4), 3.92 (s, 3H, H-10), 3.87 (d, <sup>2</sup>*J*<sub>HH</sub> = 13.1 Hz, 1H, H-11), 3.79 – 3.69 (m, 2H, H-2+H-11), 1.51 (s, 1H, N-H), 1.22 (d, <sup>3</sup>*J*<sub>HH</sub> = 6.6 Hz, 3H, H-1).

**<sup>13</sup>C{<sup>1</sup>H} NMR** (130 MHz, CDCl<sub>3</sub>)  $\delta$  (ppm) = 167.1 (C-9), 151.2 (C-3), 146.0 (C-5), 140.6 (C-12), 129.7 (CH-7), 129.2 (C-8), 128.6 (CH-Ar), 128.3 (CH-Ar), 127.17 (CH-Ar), 127.15 (CH-Ar), 114.6 (CH<sub>2</sub>-4), 56.7 (CH-2), 52.2 (CH<sub>2</sub>-11), 51.4 (CH<sub>3</sub>-10), 21.7 (CH<sub>3</sub>-1).

**HRMS** (ESI<sup>+</sup>): calculated [M+H]<sup>+</sup> for C<sub>19</sub>H<sub>21</sub>NO<sub>2</sub><sup>+</sup>: 296.1645; found: 296.1646.

**IR** (neat)  $\nu$  (cm<sup>-1</sup>): 3028, 2953, 1718, 1601, 1435, 1274, 1183, 1107, 1017, 967, 912, 862, 782, 697.

**HPLC**: 92% *ee*, chiral stationary column: OD-H, mobile phase: hexane/*i*PrOH = 95/5, 1.0 mL/min, 290 nm, 30 °C, *t*<sub>R</sub> (major) = 7.8 min, *t*<sub>R</sub> (minor) = 9.9 min.

**[ $\alpha$ ]<sup>20</sup><sub>D</sub>** = +3.5 (*c* 0.96, CH<sub>2</sub>Cl<sub>2</sub>).

# <Chromatogram>

mAU

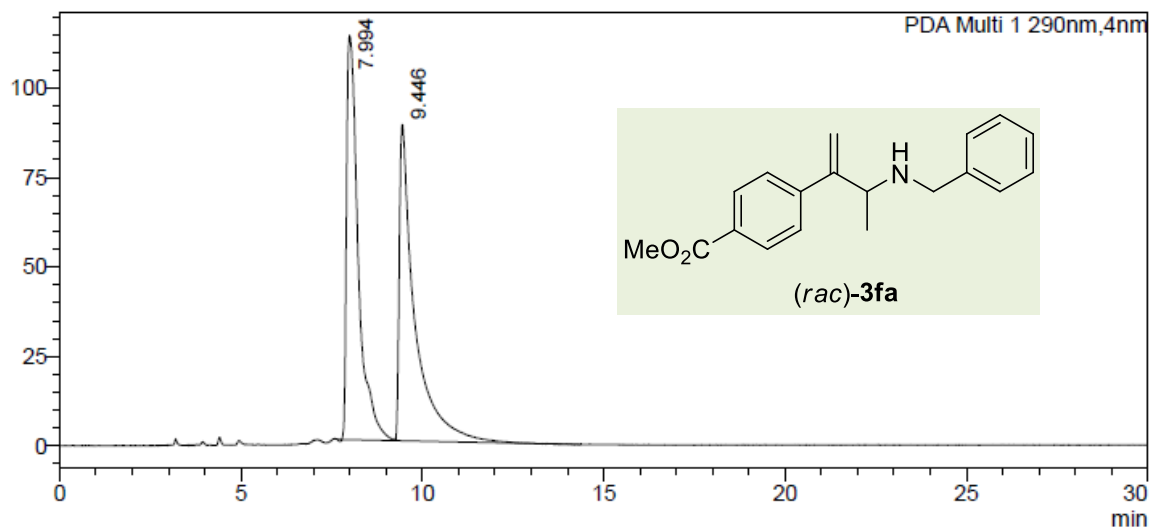

## <Peak Table>

PDA Ch1 290nm

| Peak# | Ret. Time | Area%   |
|-------|-----------|---------|
| 1     | 7.994     | 49.271  |
| 2     | 9.446     | 50.729  |
| Total |           | 100.000 |

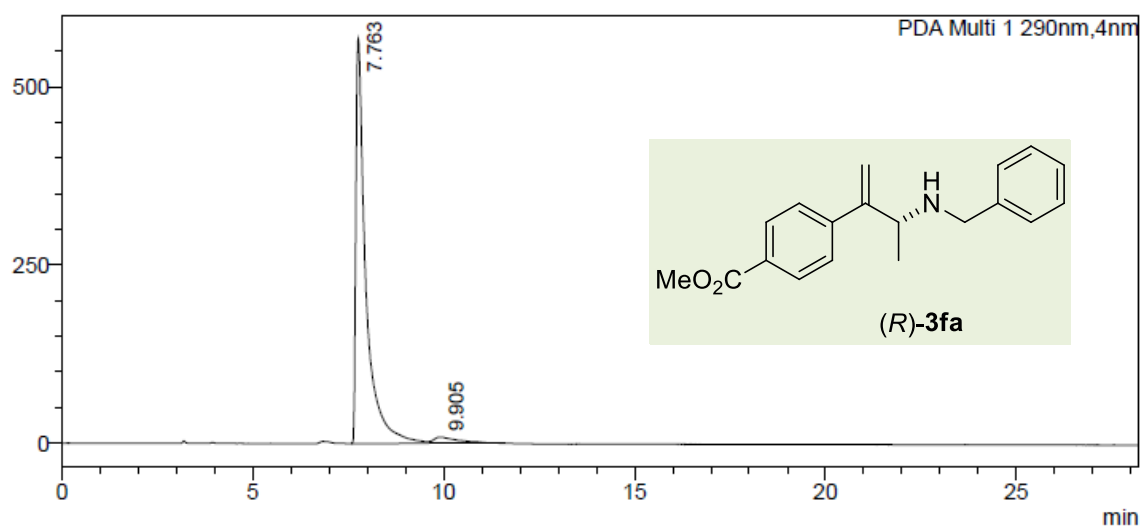

## <Peak Table>

PDA Ch1 290nm

| Peak# | Ret. Time | Area%   |
|-------|-----------|---------|
| 1     | 7.763     | 96.180  |
| 2     | 9.905     | 3.820   |
| Total |           | 100.000 |

**(*R*)-*N*-Benzyl-3-(3-methoxyphenyl)but-3-en-2-amine 3ga**

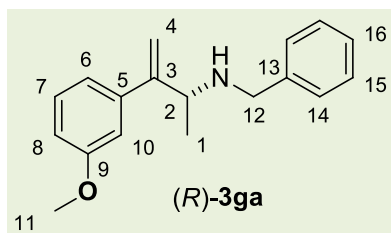

Synthesized at room temperature for 72 h following the general procedure using 1-(buta-1,3-dien-2-yl)-3-methoxybenzene **1g** (64.0 mg, 0.40 mmol, 1.0 equiv), benzylamine **2a** (175  $\mu$ L, 1.60 mmol, 4.0 equiv), Ni(cod)<sub>2</sub> (5.5 mg, 0.020 mmol, 5 mol%), (*R,R*)-BenzP\* (6.8 mg, 0.024

mmol, 6 mol%), 2,2,2-trifluoroethanol (29  $\mu$ L, 0.40 mmol, 1.0 equiv) and mesitylene (0.80 mL, 0.5 M). Consumption of **1g** >95%, conversion of **3ga**: 88%, *r.r.* = 7:1. Purification by flash chromatography over silica gel (pentane:EtOAc = 3:2) led to the desired product as a pale yellow oil (88.0 mg, 82% yield, 94% *ee*).

**<sup>1</sup>H NMR** (500 MHz, CDCl<sub>3</sub>)  $\delta$  (ppm) = 7.34 – 7.30 (m, 4H, H-14 + H-15), 7.26 – 7.21 (m, 2H, H-7 + H-16), 6.98 – 6.95 (m, 1H, H-6), 6.95 – 6.93 (m, 1H, H-10), 6.84 (ddd, <sup>3</sup>*J*<sub>HH</sub> = 8.1, <sup>4</sup>*J*<sub>HH</sub> = 2.5, 0.8 Hz, 1H, H-8), 5.32 (s, 2H, H-4), 3.87 (d, <sup>2</sup>*J*<sub>HH</sub> = 13.0 Hz, 1H, H-12), 3.80 (s, 3H, H-11), 3.76 (d, <sup>2</sup>*J*<sub>HH</sub> = 13.0 Hz, 1H, H-12), 3.72 (q, <sup>3</sup>*J*<sub>HH</sub> = 6.6 Hz, 1H, H-2), 1.54 (s, 1H, N-H), 1.23 (d, <sup>3</sup>*J*<sub>HH</sub> = 6.6 Hz, 3H, H-1).

**<sup>13</sup>C{<sup>1</sup>H} NMR** (130 MHz, CDCl<sub>3</sub>)  $\delta$  (ppm) = 159.6 (C-9), 151.9 (C-3), 142.9 (C-5), 140.8 (C-13), 129.3 (CH-7), 128.5 (CH-Ar), 128.3 (CH-Ar), 127.0 (CH-16), 119.7 (CH<sub>2</sub>-4), 113.04 (CH-Ar), 112.97 (CH-Ar), 112.8 (CH-Ar), 56.8 (CH-2), 55.4 (CH<sub>3</sub>-11), 51.4 (CH<sub>2</sub>-12), 21.7 (CH<sub>3</sub>-1).

**HRMS** (ESI<sup>+</sup>): calculated [M+H]<sup>+</sup> for C<sub>18</sub>H<sub>22</sub>NO<sup>+</sup>: 268.1696; found: 268.1731.

**IR** (neat)  $\nu$  (cm<sup>-1</sup>): 3064, 2962, 2833, 1597, 1575, 1487, 1453, 1428, 1369, 1315, 1285, 1221, 1145, 1045, 907, 784, 730, 696.

**HPLC**: 94% *ee*, chiral stationary column: OJ-H, mobile phase: hexane/*i*PrOH = 99.5/0.05, 0.50 mL/min, 254 nm, 30 °C, *t*<sub>R</sub> (major) = 37.0 min, *t*<sub>R</sub> (minor) = 42.1 min.

**[ $\alpha$ ]<sup>20</sup><sub>D</sub>** = +2.1 (*c* 0.84, CHCl<sub>3</sub>).

### <Chromatogram>

mAU

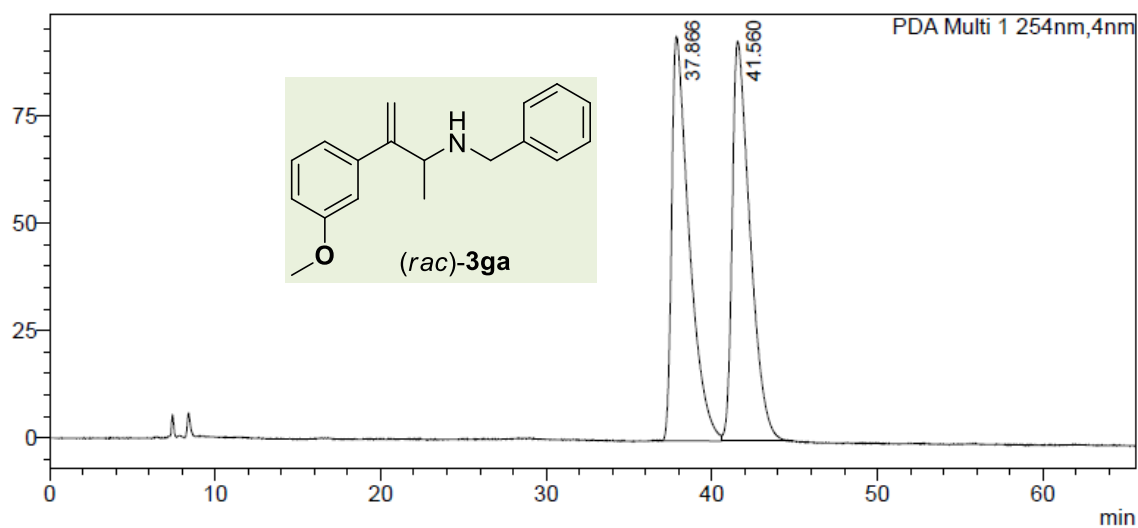

PDA Ch1 254nm

| Peak# | Ret. Time | Area%   |
|-------|-----------|---------|
| 1     | 37.866    | 49.795  |
| 2     | 41.560    | 50.205  |
| Total |           | 100.000 |

### <Chromatogram>

mAU

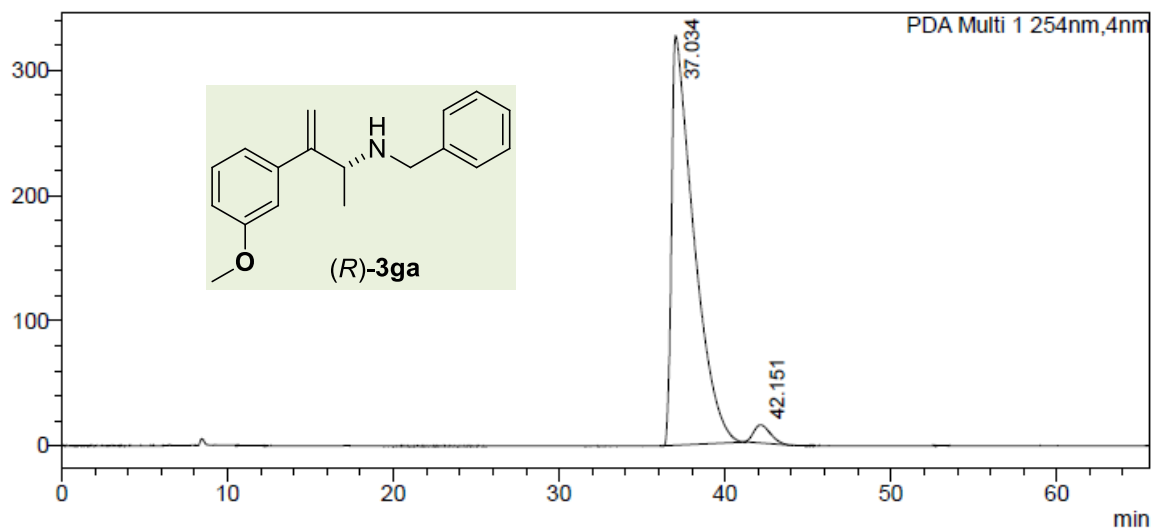

### <Peak Table>

PDA Ch1 254nm

| Peak# | Ret. Time | Area%   |
|-------|-----------|---------|
| 1     | 37.034    | 96.797  |
| 2     | 42.151    | 3.203   |
| Total |           | 100.000 |



**(*R*)-*N*-Benzyl-3-(6-methoxypyridin-3-yl)but-3-en-2-amine 3ha**

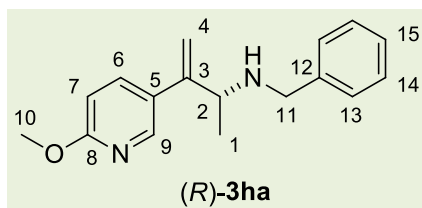

Synthesized at room temperature for 72 h following the general procedure using 5-(buta-1,3-dien-2-yl)-2-methoxypyridine **1h** (65.0 mg, 0.40 mmol, 1.0 equiv), benzylamine **2a** (175  $\mu$ L, 1.60 mmol, 4.0 equiv), Ni(cod)<sub>2</sub> (5.5 mg, 0.020 mmol, 5 mol%), (*R,R*)-BenzP\* (6.8 mg,

0.024 mmol, 6 mol%), 2,2,2-trifluoroethanol (29  $\mu$ L, 0.40 mmol, 1.0 equiv) and mesitylene (0.80 mL, 0.5 M). Consumption of **1h**: >95%, conversion of **3ha**: 80%, *r.r.* = 5:1. Purification by flash chromatography over silica gel (pentane:EtOAc = 3:2) led to the desired product as a clear colorless oil (84.0 mg, 78% yield, 95% ee).

**<sup>1</sup>H NMR** (500 MHz, CDCl<sub>3</sub>)  $\delta$  (ppm) = 8.22 (d, <sup>4</sup>*J*<sub>HH</sub> = 2.1 Hz, 1H, H-9), 7.65 (dd, <sup>3</sup>*J*<sub>HH</sub> = 8.7, <sup>4</sup>*J*<sub>HH</sub> = 2.5 Hz, 1H, H-6), 7.36 – 7.28 (m, 4H, H-13 + H-14), 7.29 – 7.22 (m, 1H, H-15), 6.70 (dd, <sup>3</sup>*J*<sub>HH</sub> = 8.7, <sup>5</sup>*J*<sub>HH</sub> = 0.6 Hz, 1H, H-7), 5.30 (s, 1H, H-4), 5.26 (d, <sup>2</sup>*J*<sub>HH</sub> = 1.2 Hz, 1H, H-4), 3.94 (s, 3H, H-10), 3.86 (d, <sup>2</sup>*J*<sub>HH</sub> = 13.2 Hz, 1H, H-11), 3.74 (d, <sup>2</sup>*J*<sub>HH</sub> = 13.2 Hz, 1H, H-11), 3.67 (q, <sup>3</sup>*J*<sub>HH</sub> = 6.3 Hz, 1H, H-2), 1.48 (s, 1H, N-H), 1.21 (d, <sup>3</sup>*J*<sub>HH</sub> = 6.6 Hz, 3H, H-1).

**<sup>13</sup>C{<sup>1</sup>H} NMR** (130 MHz, CDCl<sub>3</sub>)  $\delta$  (ppm) = 163.7 (C-8), 148.5 (C-3), 145.2 (CH-9), 140.7 (C-12), 137.7 (CH-6), 129.8 (C-5), 128.6 (CH-Ar), 128.3 (CH-Ar), 127.1 (CH-15), 113.4 (CH<sub>2</sub>-4), 110.3 (CH-7), 57.2 (CH-2), 53.6 (CH<sub>3</sub>-10), 51.5 (CH<sub>2</sub>-11), 21.6 (CH<sub>3</sub>-1).

**HRMS** (ESI<sup>+</sup>): calculated [M+H]<sup>+</sup> for C<sub>17</sub>H<sub>20</sub>N<sub>2</sub>O<sup>+</sup>: 269.1649; found: 269.1689.

**IR** (neat)  $\nu$  (cm<sup>-1</sup>): 3027, 2971, 624, 1599, 1490, 1455, 1366, 1282, 1248, 1126, 1024, 907, 832, 734, 697.

**HPLC**: 95% ee, chiral stationary column: OJ-H, mobile phase: hexane/*i*PrOH = 99.5/0.05, 0.50 mL/min, 254 nm, 30 °C, *t*<sub>R</sub> (major) = 40.8 min, *t*<sub>R</sub> (minor) = 44.8 min.

**[ $\alpha$ ]<sup>20</sup><sub>D</sub>** = +16.7 (*c* 1.01, CHCl<sub>3</sub>).

### <Chromatogram>

mAU

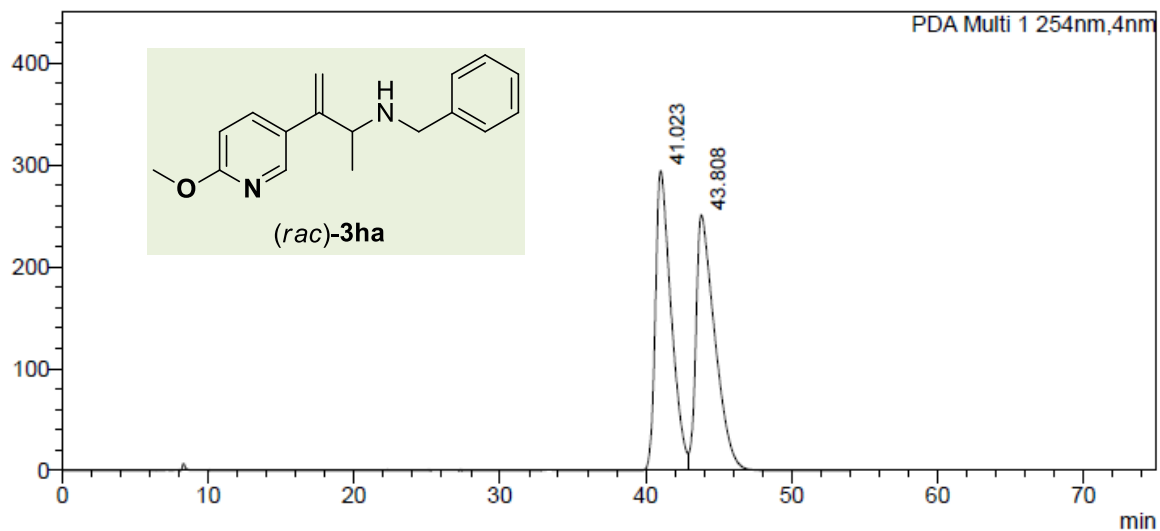

### <Peak Table>

PDA Ch1 254nm

| Peak# | Ret. Time | Area%   |
|-------|-----------|---------|
| 1     | 41.023    | 49.349  |
| 2     | 43.808    | 50.651  |
| Total |           | 100.000 |

### <Chromatogram>

mAU

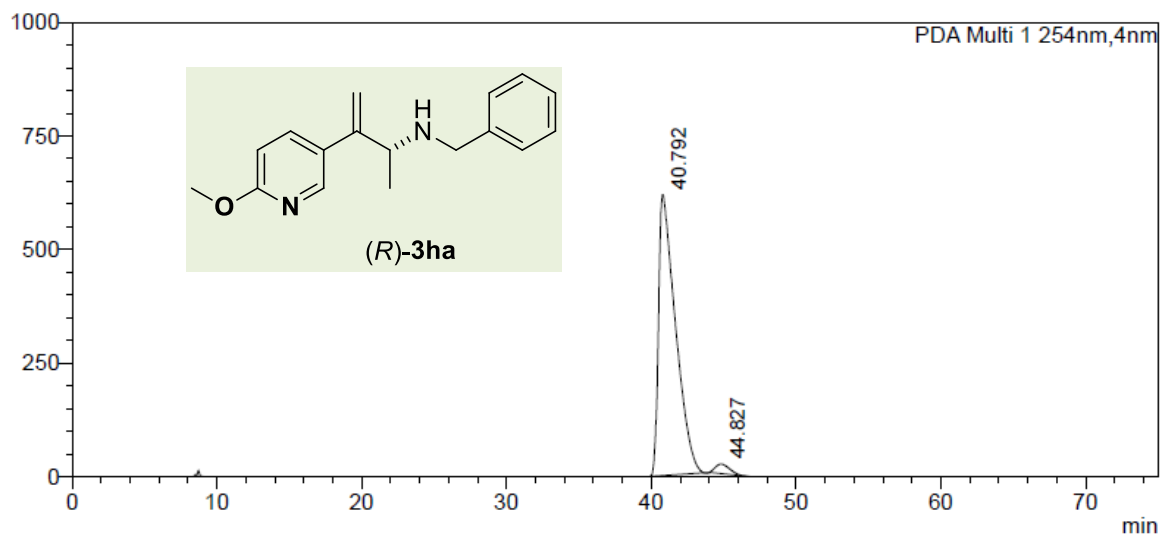

### <Peak Table>

PDA Ch1 254nm

| Peak# | Ret. Time | Area%   |
|-------|-----------|---------|
| 1     | 40.792    | 97.244  |
| 2     | 44.827    | 2.756   |
| Total |           | 100.000 |

**(R)-N-Benzyl-3-methylene-5-phenylpentan-2-amine 3ia**

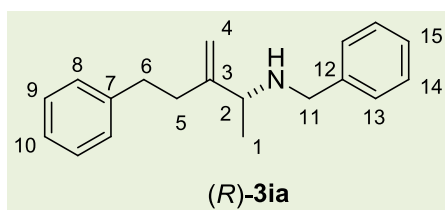

Synthesized at room temperature for 72 h following the general procedure using (3-methylenepent-4-en-1-yl)benzene **1i** (40.0 mg, 0.25 mmol, 1.0 equiv), benzylamine **2a** (110  $\mu$ L, 1.00 mmol, 4.0 equiv), Ni(cod)<sub>2</sub> (3.4 mg, 0.0125 mmol, 5 mol%), (*R,R*)-BenzP\* (4.2 mg, 0.015 mmol, 6 mol%), Ph<sub>2</sub>P(O)OH (55.0 mg, 0.25 mmol, 1.0 equiv) and mesitylene (0.50 mL, 0.5 M). Consumption of **1i**: 93%, conversion of **3ia**: 48%, *r.r.* = 1.1:1. Purification by flash chromatography over silica gel (pentane:EtOAc = 4:1) led to the desired product as a pale yellow oil (30.0 mg, 45% yield, 15% ee).

**<sup>1</sup>H NMR** (300 MHz, CDCl<sub>3</sub>)  $\delta$  (ppm) = 7.29 – 7.13 (m, 10H, H-Ar), 5.01 (s, 1H, H-4), 4.90 (q, <sup>2</sup>J<sub>HH</sub> = 1.4 Hz, 1H, H-4), 3.67 (d, <sup>2</sup>J<sub>HH</sub> = 13.1 Hz, 1H, H-11), 3.56 (d, <sup>2</sup>J<sub>HH</sub> = 13.1 Hz, 1H, H-11), 3.23 (q, <sup>3</sup>J<sub>HH</sub> = 6.6 Hz, 1H, H-2), 2.85 – 2.67 (m, 2H, H-5), 2.43 – 2.21 (m, 2H, H-6), 1.26 (s, 1H, N-H), 1.14 (d, <sup>3</sup>J<sub>HH</sub> = 6.6 Hz, 3H, H-1).

**<sup>13</sup>C{<sup>1</sup>H} NMR** (75 MHz, CDCl<sub>3</sub>)  $\delta$  (ppm) = 151.7 (C-3), 142.5 (C-7), 141.0 (C-12), 128.52 (CH-Ar), 128.48 (CH-Ar), 128.46 (CH-Ar), 128.3 (CH-Ar), 126.9 (CH-10 or CH-15), 125.9 (CH-10 or CH-15), 110.0 (CH<sub>2</sub>-4), 58.8 (CH-2), 51.6 (CH<sub>2</sub>-11), 34.7 (CH<sub>2</sub>-6), 33.0 (CH<sub>2</sub>-5), 21.4 (CH<sub>3</sub>-1).

**HRMS** (ESI<sup>+</sup>): calculated [M+H]<sup>+</sup> for C<sub>19</sub>H<sub>24</sub>N<sup>+</sup>: 266.1914; found: 266.1937.

**IR** (neat)  $\nu$  (cm<sup>-1</sup>): 3027, 2925, 1643, 1604, 1495, 1453, 1369, 1317, 1202, 1120, 1029, 897, 738, 695.

**HPLC**: 15% ee, chiral stationary column: OJ-H, mobile phase: hexane/*i*PrOH = 99/1, 1.0 mL/min, 254 nm, 30 °C, *t*<sub>R</sub> (major) = 13.2 min, *t*<sub>R</sub> (minor) = 14.7 min.

**[ $\alpha$ ]<sup>20</sup><sub>D</sub>** = +1.8 (*c* 0.355, CH<sub>2</sub>Cl<sub>2</sub>).

### <Chromatogram>

mAU

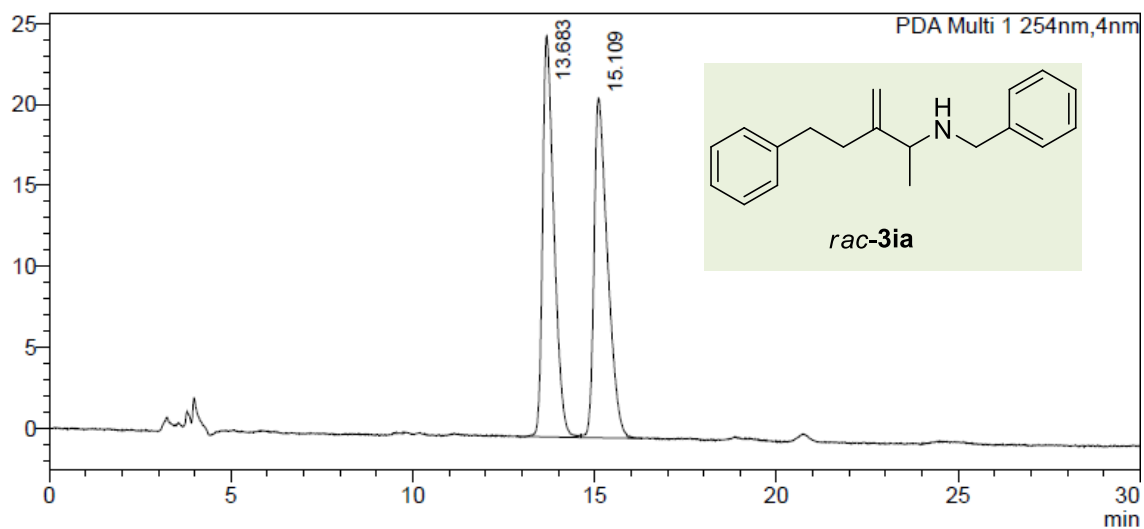

### <Peak Table>

PDA Ch1 254nm

| Peak# | Ret. Time | Area%   |
|-------|-----------|---------|
| 1     | 13.683    | 49.778  |
| 2     | 15.109    | 50.222  |
| Total |           | 100.000 |

### <Chromatogram>

mAU

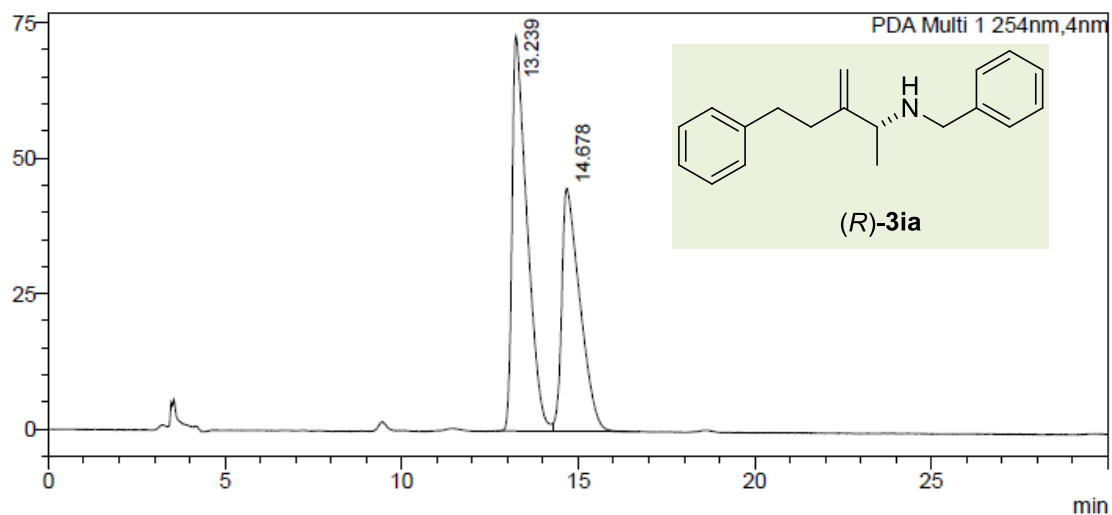

PDA Ch1 254nm

| Peak# | Ret. Time | Area%   |
|-------|-----------|---------|
| 1     | 13.239    | 57.325  |
| 2     | 14.678    | 42.675  |
| Total |           | 100.000 |

## 4.2 Scope in amines

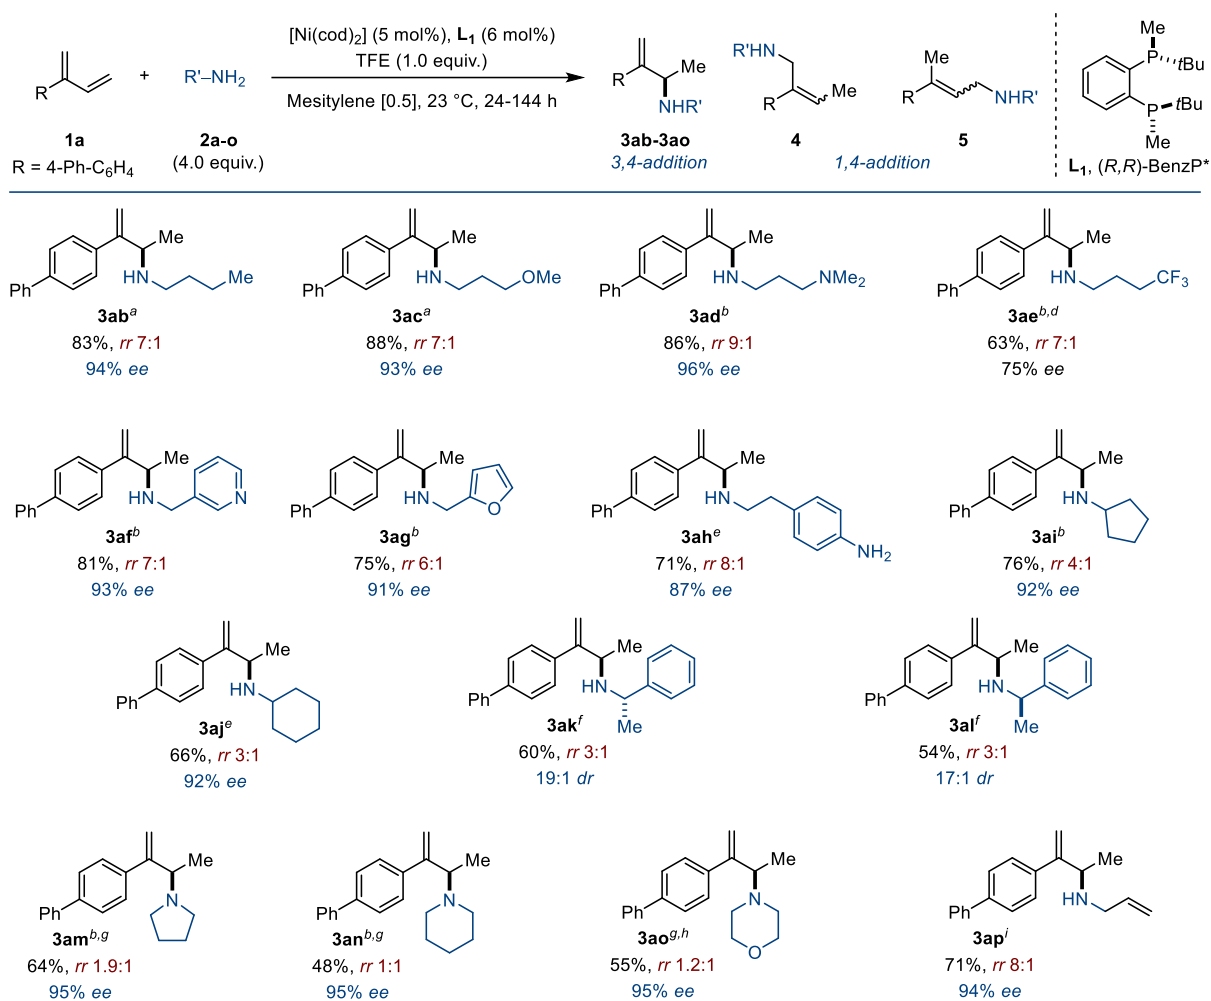

**Figure S2. Scope of the Ni-catalyzed hydroamination of 2-substituted 1,3-dienes - Variation of the amine component.** 0.25-0.40 mmol scale. Yields of 3,4-addition product after purification. Regioselectivity expressed as the ratio between 3,4- and 1,4-addition products as determined by  $^1\text{H}$  NMR using an internal standard (**3**:[**4**+**5**]). Enantiomeric excess determined by GC or HPLC equipped with chiral columns. <sup>a</sup> 48 h. <sup>b</sup> 72 h. <sup>c</sup> 120 h. <sup>d</sup> 40 °C. <sup>e</sup> 96 h. <sup>f</sup> 144 h. <sup>g</sup> 0.2 equiv.  $\text{Ph}_2\text{P}(\text{O})\text{OH}$  instead of TFE. <sup>h</sup> 24 h. <sup>i</sup> 20 h

**(*R*)-3-([1,1'-Biphenyl]-4-yl)-*N*-butylbut-3-en-2-amine **3ab****

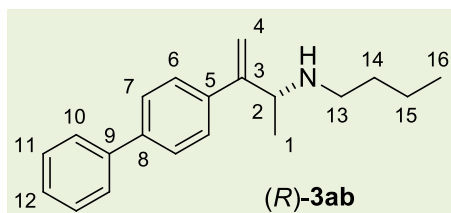

Synthesized at room temperature for 48 h in 0.40 mmol scale following the general procedure using 4-(buta-1,3-dien-2-yl)-1,1'-biphenyl **1a** (82.5 mg, 0.40 mmol, 1.0 equiv), *n*-butylamine **2b** (158  $\mu$ L, 1.60 mmol, 4.0 equiv), Ni(cod)<sub>2</sub> (5.5 mg, 0.020 mmol, 5 mol%), (*R,R*)-BenzP\* (6.8 mg, 0.024 mmol, 6 mol%), 2,2,2-trifluoroethanol (30  $\mu$ L, 0.40 mmol, 1.0 equiv) and mesitylene (0.80 mL, 0.5 M). Consumption of **1a**: >99%, conversion of **3ab**: 87%, *r.r.* = 7:1.

Purification by flash chromatography over silica gel (pentane:EtOAc = 3:1) led to the desired product as a colorless viscous oil (93.0 mg, 83% yield, 94% ee).

**<sup>1</sup>H NMR** (400 MHz, CDCl<sub>3</sub>)  $\delta$  (ppm) = 7.64 – 7.54 (m, 4H, *H*-10+*H*-7), 7.51 – 7.40 (m, 4H, *H*-6+*H*-11), 7.39 – 7.30 (m, 1H, *H*-12), 5.33 (s, 1H, *H*-4), 5.29 (s, 1H, *H*-4), 3.74 (q, <sup>3</sup>*J*<sub>HH</sub> = 6.5 Hz, 1H, *H*-2), 2.77 – 2.53 (m, 2H, *H*-13), 1.54 – 1.46 (m, 2H, *H*-14), 1.41 – 1.22 (m, 3H, *H*-15+*NH*), 1.25 (d, <sup>3</sup>*J*<sub>HH</sub> = 6.5 Hz, 3H, *H*-1), 0.91 (t, <sup>3</sup>*J*<sub>HH</sub> = 7.3 Hz, 3H, *H*-16).

**<sup>13</sup>C{<sup>1</sup>H} NMR** (100 MHz, CDCl<sub>3</sub>)  $\delta$  (ppm) = 151.9 (C-3), 140.9 (C-9), 140.4 (C-5), 140.3 (C-8), 128.9 (CH-11), 127.5 (CH-6), 127.4 (CH-12), 127.13 (CH-10), 127.05 (CH-7), 112.5 (CH<sub>2</sub>-4), 57.5 (CH-2), 47.4 (CH<sub>2</sub>-13), 32.6 (CH<sub>2</sub>-14), 21.8 (CH<sub>3</sub>-1), 20.7 (CH<sub>2</sub>-15), 14.2 (CH<sub>3</sub>-16).

**HRMS** (ESI<sup>+</sup>): calculated [M+H]<sup>+</sup> for C<sub>20</sub>H<sub>26</sub>N<sup>+</sup>: 280.2060; found: 280.2067.

**IR** (neat)  $\nu$  (cm<sup>-1</sup>): 3030, 2958, 2926, 2870, 1625, 1601, 1486, 1448, 1370, 1137, 1077, 1007, 907, 842, 769, 739, 695.

**HPLC**: 94% ee, chiral stationary column: OJ-H, mobile phase: hexane/*i*PrOH = 97/3, 1.0 mL/min, 254 nm, 30 °C, *t*<sub>R</sub> (minor) = 6.2 min, *t*<sub>R</sub> (major) = 7.5 min.

**[ $\alpha$ ]<sup>20</sup><sub>D</sub>** = -3.8 (c 0.1, CHCl<sub>3</sub>).

### <Chromatogram>

mAU

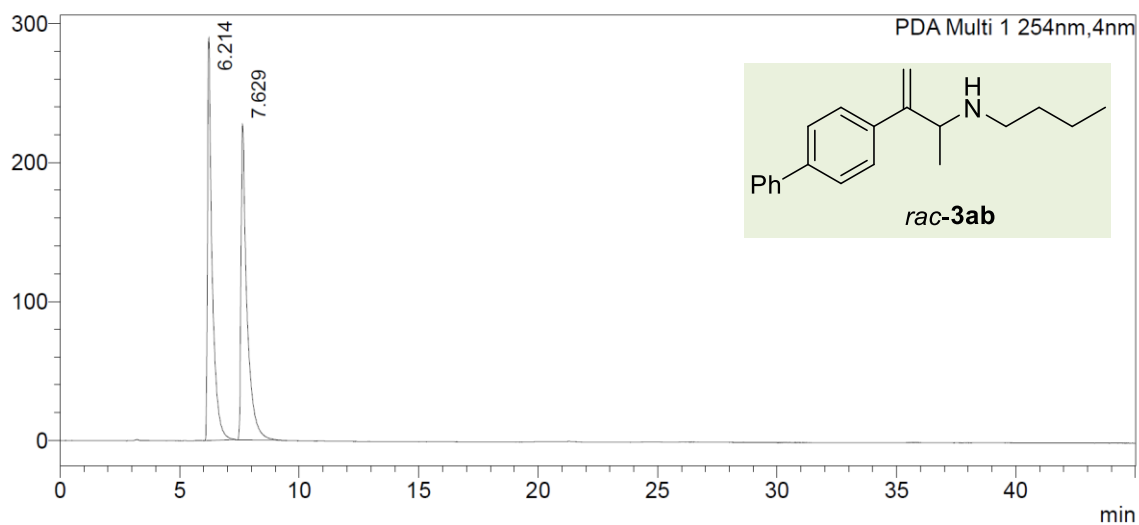

### <Peak Table>

PDA Ch1 254nm

| Peak# | Ret. Time | Area%   |
|-------|-----------|---------|
| 1     | 6.214     | 50.099  |
| 2     | 7.629     | 49.901  |
| Total |           | 100.000 |

### <Chromatogram>

mAU

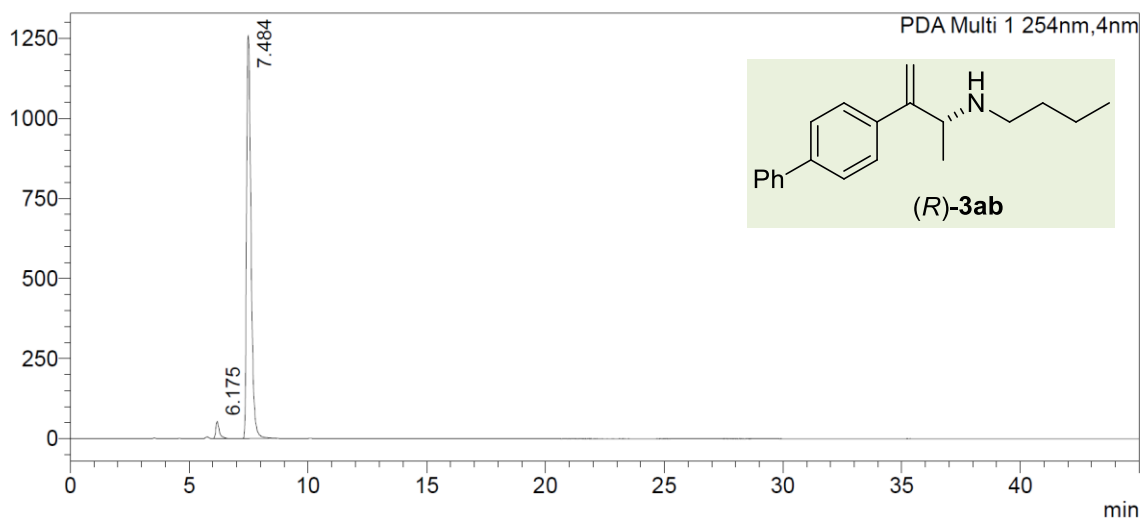

### <Peak Table>

PDA Ch1 254nm

| Peak# | Ret. Time | Area%   |
|-------|-----------|---------|
| 1     | 6.175     | 3.231   |
| 2     | 7.484     | 96.769  |
| Total |           | 100.000 |

**(*R*)-3-([1,1'-Biphenyl]-4-yl)-*N*-(3-methoxypropyl)but-3-en-2-amine **3ac****

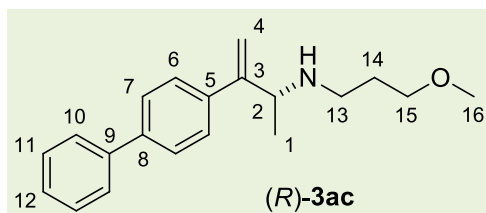

Synthesized at room temperature for 72 h following the general procedure using 4-(buta-1,3-dien-2-yl)-1,1'-biphenyl **1a** (51.6 mg, 0.25 mmol, 1.0 equiv), 3-methoxypropylamine **2c** (102  $\mu$ L, 1.00 mmol, 4.0 equiv), Ni(cod)<sub>2</sub> (3.4 mg, 0.0125 mmol, 5 mol%),

(*R,R*)-BenzP\* (4.2 mg, 0.015 mmol, 6 mol%), 2,2,2-trifluoroethanol (19  $\mu$ L, 0.25 mmol, 1.0 equiv) and mesitylene (0.50 mL, 0.5 M). Consumption of **1a**: >99%, conversion of **3ac**: 87%, *r.r.* = 7:1. Purification by flash chromatography over silica gel (CH<sub>2</sub>Cl<sub>2</sub>:MeOH = 20:1) led to the desired product as a yellow viscous oil (65.3 mg, 88% yield, 93% *ee*).

**<sup>1</sup>H NMR** (400 MHz, CDCl<sub>3</sub>)  $\delta$  (ppm) = 7.64 – 7.54 (m, 4H, *H*-7+*H*-10), 7.50 – 7.41 (m, 4H, *H*-6+*H*-11), 7.38 – 7.31 (m, 1H, *H*-12), 5.35 (d, <sup>2</sup>*J*<sub>HH</sub> = 1.0 Hz, 1H, *H*-4), 5.30 (s, 1H, *H*-4), 3.78 (q, <sup>3</sup>*J*<sub>HH</sub> = 6.5 Hz, 1H, *H*-2), 3.45 (t, <sup>3</sup>*J*<sub>HH</sub> = 6.2 Hz, 2H, *H*-15), 3.29 (s, 3H, *H*-16), 2.87 – 2.69 (m, 2H, *H*-13), 2.42 (br, 1H, *NH*), 1.81 (p, <sup>3</sup>*J*<sub>HH</sub> = 6.5 Hz, 2H, *H*-14), 1.28 (d, <sup>3</sup>*J*<sub>HH</sub> = 6.6 Hz, 3H, *H*-1).

**<sup>13</sup>C{<sup>1</sup>H} NMR** (100 MHz, CDCl<sub>3</sub>)  $\delta$  (ppm) = 151.3 (C-3), 140.9 (C-8), 140.4 (C-9), 140.2 (C-5), 128.9 (CH-11), 127.5 (CH-7), 127.4 (CH-12), 127.12 (CH-6), 127.10 (CH-10), 113.0 (CH<sub>2</sub>-4), 71.6 (CH<sub>2</sub>-15), 58.8 (CH<sub>3</sub>-16), 57.5 (CH-2), 44.9 (CH<sub>2</sub>-13), 30.1 (CH<sub>2</sub>-14), 21.4 (CH<sub>3</sub>-1).

**HRMS** (ESI<sup>+</sup>): calculated [M+H]<sup>+</sup> for C<sub>20</sub>H<sub>26</sub>NO<sup>+</sup>: 296.2009; found: 296.2069.

**IR** (neat)  $\nu$  (cm<sup>-1</sup>): 3030, 2925, 2867, 1626, 1598, 1486, 1448, 1387, 1191, 1116, 1077, 1038, 1006, 907, 844, 771, 741, 697.

**HPLC**: 93% *ee*, chiral stationary column: OJ-H, mobile phase: hexane/*i*PrOH = 95/5, 1.0 mL/min, 254 nm, 30 °C, *t*<sub>R</sub> (minor) = 10.7 min, *t*<sub>R</sub> (major) = 13.5 min.

**[ $\alpha$ ]<sup>20</sup><sub>D</sub>** = +9.4 (*c* 1.0, CHCl<sub>3</sub>).



### <Chromatogram>

mAU

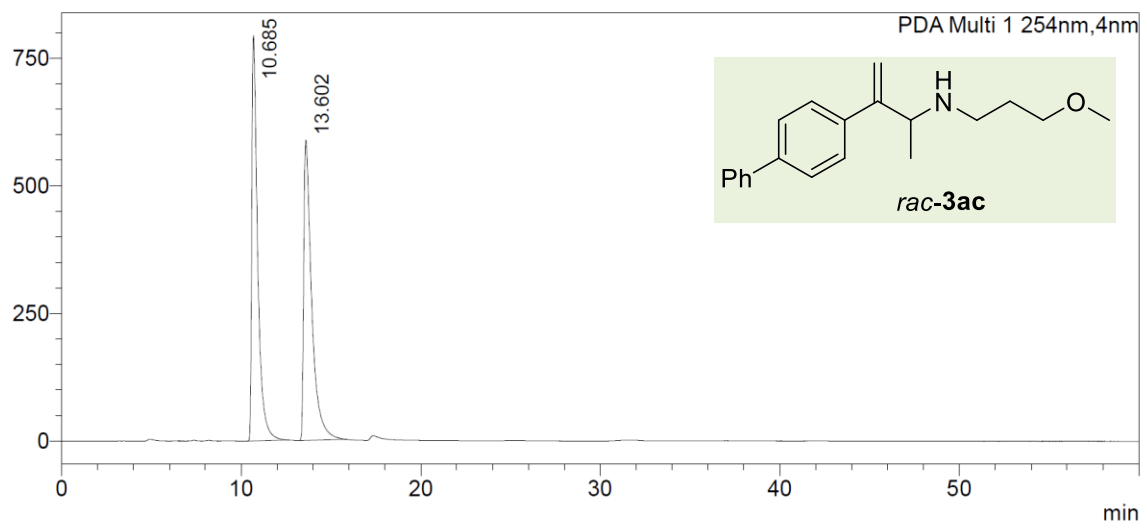

### <Peak Table>

PDA Ch1 254nm

| Peak# | Ret. Time | Area%   |
|-------|-----------|---------|
| 1     | 10.685    | 49.996  |
| 2     | 13.602    | 50.004  |
| Total |           | 100.000 |

### <Chromatogram>

mAU

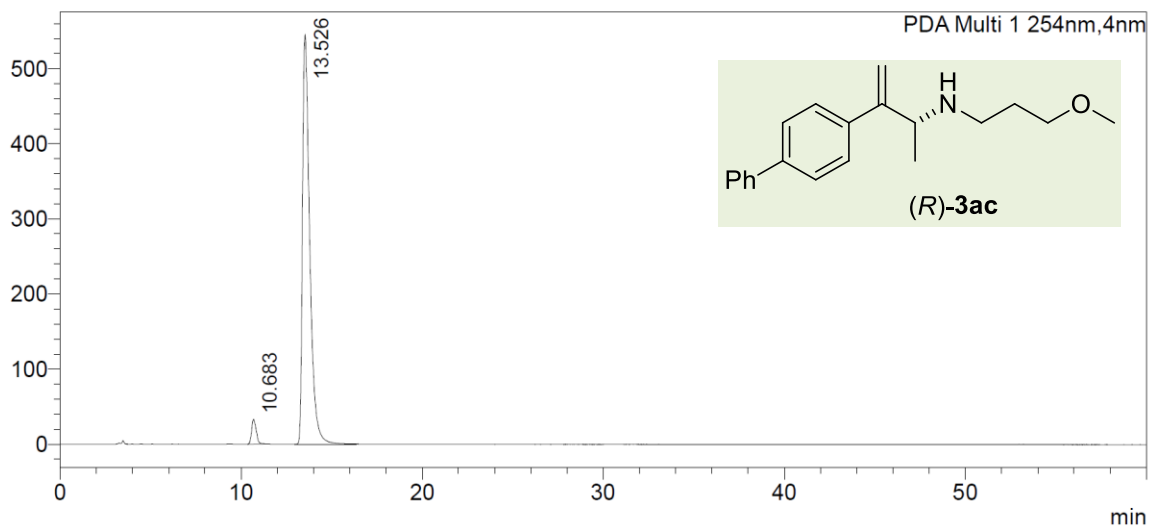

### <Peak Table>

PDA Ch1 254nm

| Peak# | Ret. Time | Area%   |
|-------|-----------|---------|
| 1     | 10.683    | 3.654   |
| 2     | 13.526    | 96.346  |
| Total |           | 100.000 |

**(*R*)-*N'*-(3-([1,1'-Biphenyl]-4-yl)but-3-en-2-yl)-*N*<sup>β</sup>,*N*<sup>β</sup>-dimethylpropane-1,3-diamine **3ad****

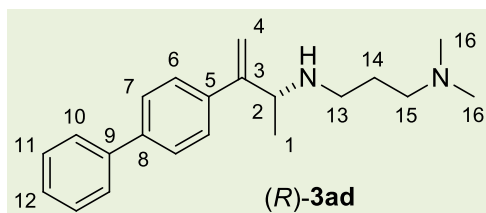

Synthesized at room temperature for 72 h following the general procedure using 4-(buta-1,3-dien-2-yl)-1,1'-biphenyl **1a** (51.6 mg, 0.25 mmol, 1.0 equiv), 3-(dimethylamino)-1-propylamine **2d** (126  $\mu$ L, 1.00 mmol, 4.0 equiv), Ni(cod)<sub>2</sub> (3.4 mg, 0.0125 mmol, 5

mol%), (*R,R*)-BenzP\* (4.2 mg, 0.015 mmol, 6 mol%), 2,2,2-trifluoroethanol (19  $\mu$ L, 0.25 mmol, 1.0 equiv) and mesitylene (0.50 mL, 0.5 M). Consumption of **1a**: >99%, conversion of **3ad**: 88%, *r.r.* = 9:1. Purification by flash chromatography over silica gel (CH<sub>2</sub>Cl<sub>2</sub>:MeOH = 3:1, with 1% Et<sub>3</sub>N) led to the desired product as a yellow viscous oil (66.2 mg, 86% yield, 96% ee).

**<sup>1</sup>H NMR** (400 MHz, CDCl<sub>3</sub>)  $\delta$  (ppm) = 7.63 – 7.54 (m, 4H, *H*-7+*H*-10), 7.50 – 7.41 (m, 4H, *H*-6+*H*-11), 7.37 – 7.31 (m, 1H, *H*-12), 5.32 (d, <sup>2</sup>*J*<sub>HH</sub> = 1.1 Hz, 1H, *H*-4), 5.27 (s, 1H, *H*-4), 3.73 (q, <sup>3</sup>*J*<sub>HH</sub> = 6.5 Hz, 1H, *H*-2), 2.78 – 2.61 (m, 2H, *H*-13), 2.38 – 2.26 (m, 2H, *H*-15), 2.21 (s, 6H, *H*-16), 1.68 (p, <sup>3</sup>*J*<sub>HH</sub> = 7.1 Hz, 2H, *H*-14), 1.26 (s, 1H, *NH*), 1.24 (d, <sup>3</sup>*J*<sub>HH</sub> = 6.6 Hz, 3H, *H*-1).

**<sup>13</sup>C{<sup>1</sup>H} NMR** (100 MHz, CDCl<sub>3</sub>)  $\delta$  (ppm) = 151.7 (C-3), 140.9 (C-9), 140.34 (C-8), 140.30 (C-5), 128.9 (CH-11), 127.5 (CH-6), 127.4 (CH-12), 127.12 (CH-10), 127.05 (CH-7), 112.6 (CH<sub>2</sub>-4), 58.3 (CH<sub>2</sub>-15), 57.5 (CH-2), 46.1 (CH<sub>2</sub>-13), 45.7 (CH<sub>3</sub>-16), 28.4 (CH<sub>2</sub>-14), 21.7 (CH<sub>3</sub>-1).

**HRMS** (ESI<sup>+</sup>): calculated [M+H]<sup>+</sup> for C<sub>21</sub>H<sub>29</sub>N<sub>2</sub><sup>+</sup>: 309.2326; found: 296.2354.

**IR** (neat)  $\nu$  (cm<sup>-1</sup>): 3345, 3029, 2941, 2764, 1629, 1589, 1486, 1462, 1379, 1265, 1150, 1081, 1040, 1006, 909, 842, 769, 740, 697.

**HPLC**: 96% ee, chiral stationary column: AD-H, mobile phase: hexane/*i*PrOH = 99/1, 1.0 mL/min, 254 nm, 30 °C, *t*<sub>R</sub> (major) = 11.1 min, *t*<sub>R</sub> (minor) = 14.7 min. (After protecting the secondary amine with Boc (*tert*-butoxycarbonyl) group, the enantiomeric excess of protected product can be determined by chiral AD-H column)

**[ $\alpha$ ]<sup>20</sup><sub>D</sub>** = -2.7 (*c* 0.2, CHCl<sub>3</sub>).

### <Chromatogram>

mAU

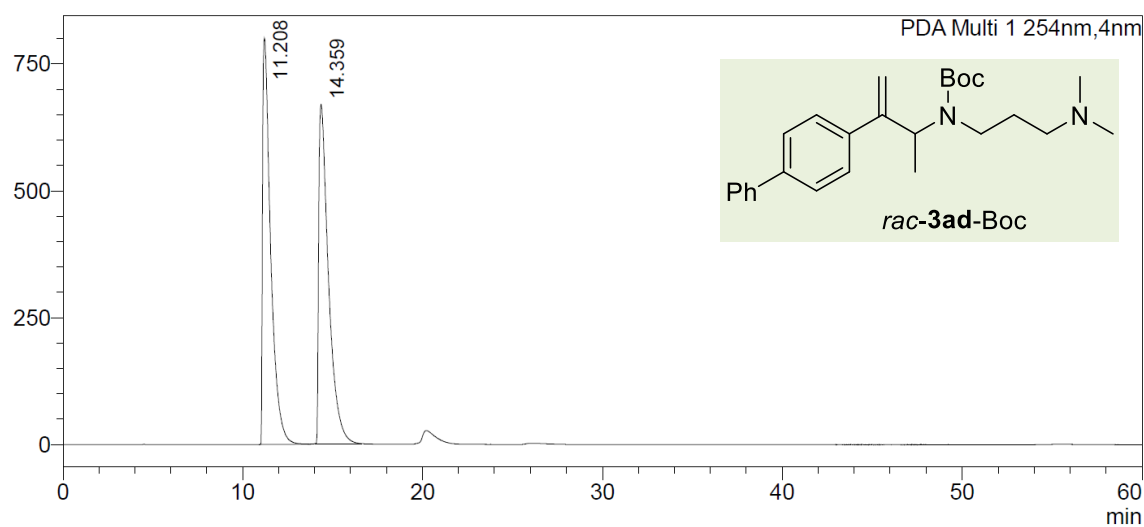

### <Peak Table>

PDA Ch1 254nm

| Peak# | Ret. Time | Area%   |
|-------|-----------|---------|
| 1     | 11.208    | 49.900  |
| 2     | 14.359    | 50.100  |
| Total |           | 100.000 |

### <Chromatogram>

mAU

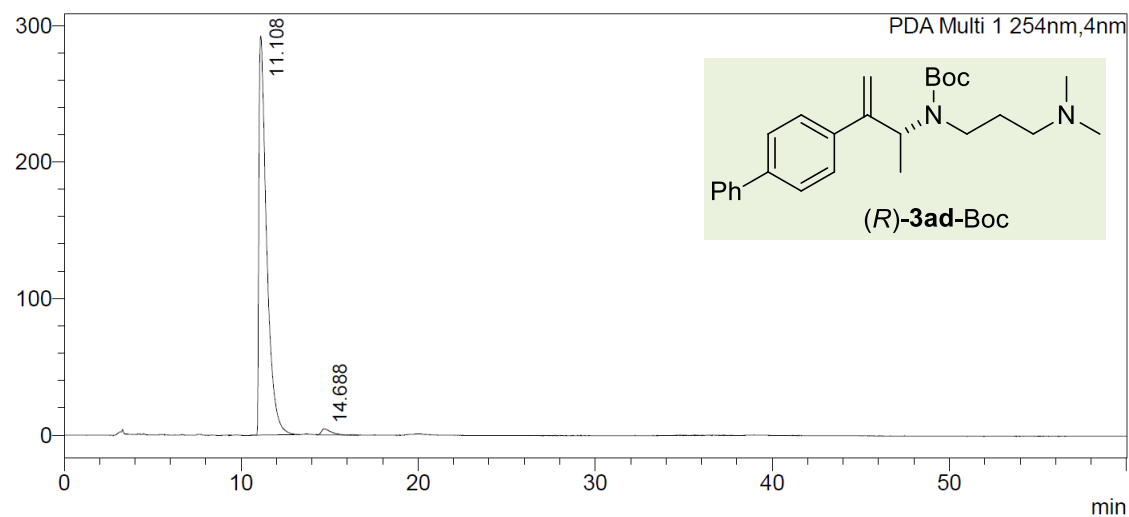

### <Peak Table>

PDA Ch1 254nm

| Peak# | Ret. Time | Area%   |
|-------|-----------|---------|
| 1     | 11.108    | 98.241  |
| 2     | 14.688    | 1.759   |
| Total |           | 100.000 |

**(R)-3-([1,1'-Biphenyl]-4-yl)-N-(3,3,3-trifluoropropyl)but-3-en-2-amine 3ae**

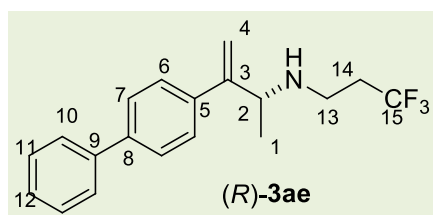

Synthesized at 40 °C for 72 h following the general procedure using 4-(buta-1,3-dien-2-yl)-1,1'-biphenyl **1a** (52.0 mg, 0.25 mmol, 1.0 equiv), 3,3,3-trifluoropropan-1-amine **2e** (113.0 mg, 1.00 mmol, 4.0 equiv), Ni(cod)<sub>2</sub> (3.4 mg, 0.0125 mmol, 5 mol%), (*R,R*)-BenzP\* (4.2 mg, 0.015

mmol, 6 mol%), 2,2,2-trifluoroethanol (18 μL, 0.25 mmol, 1.0 equiv) and mesitylene (0.50 mL, 0.5 M). Consumption of **1a**: >95%, conversion of **3ae**: 65%, *r.r.* = 7:1. Purification by flash chromatography over silica gel (pentane:EtOAc = 6:1) led to the desired product as a pale yellow oil (50.0 mg, 63% yield, 75% *ee*).

**<sup>1</sup>H NMR** (500 MHz, CDCl<sub>3</sub>) δ (ppm) = 7.64 – 7.58 (m, 2H, H-10), 7.61 – 7.54 (m, 2H, H-7), 7.50 – 7.41 (m, 4H, H-6 + H-11), 7.35 (tt, <sup>3</sup>J<sub>HH</sub> = 6.9, <sup>4</sup>J<sub>HH</sub> = 1.4 Hz, 1H, H-12), 5.36 (s, 1H, H-4), 5.30 (s, 1H, H-4), 3.75 (q, <sup>3</sup>J<sub>HH</sub> = 6.5 Hz, 1H, H-2), 2.97 (dt, <sup>2</sup>J<sub>HH</sub> = 12.2, <sup>3</sup>J<sub>HH</sub> = 7.4 Hz, 1H, H-13), 2.88 (dt, <sup>2</sup>J<sub>HH</sub> = 12.2, <sup>3</sup>J<sub>HH</sub> = 6.9 Hz, 1H, H-13), 2.34 (dtd<sub>app</sub>, *J* = 14.3, 10.7, 5.4 Hz, 2H, H-14), 1.56 (s, 1H, N-H), 1.27 (d, <sup>3</sup>J<sub>HH</sub> = 6.5 Hz, 3H, H-1).

**<sup>13</sup>C{<sup>1</sup>H} NMR** (130 MHz, CDCl<sub>3</sub>) δ (ppm) = 151.0 (C-3), 140.8 (C-9), 140.5 (C-8), 139.9 (C-5), 128.9 (CH-11), 127.48 (CH-12), 127.44 (CH-6), 127.1 (CH-7 + CH-10), 126.8 (q, <sup>1</sup>J<sub>CF</sub> = 277 Hz, C-15), 113.1 (CH<sub>2</sub>-4), 57.5 (CH-2), 40.3 (q, <sup>3</sup>J<sub>CF</sub> = 2 Hz, CH<sub>2</sub>-13), 34.7 (q, <sup>2</sup>J<sub>CF</sub> = 27 Hz, CH<sub>2</sub>-14), 21.7 (CH<sub>3</sub>-1).

**<sup>19</sup>F{<sup>1</sup>H} NMR** (280 MHz, Toluene-*d*<sub>8</sub>) δ (ppm) = -65.00.

**HRMS** (ESI<sup>+</sup>): calculated [M+H]<sup>+</sup> for C<sub>19</sub>H<sub>20</sub>NF<sub>3</sub><sup>+</sup>: 320.1621; found: 320.1646.

**IR** (neat) ν (cm<sup>-1</sup>): 3030, 2967, 1625, 1601, 1487, 1444, 1373, 1340, 1252, 1113, 1004, 911, 844, 770, 740, 696.

**HPLC**: 75% *ee*, chiral stationary column: OJ-H, mobile phase: hexane/*i*PrOH = 99/1, 1.0 mL/min, 254 nm, 30 °C, *t*<sub>R</sub> (minor) = 29.5 min, *t*<sub>R</sub> (major) = 39.1 min.

[α]<sub>D</sub><sup>20</sup> = -33.96 (*c* 0.25, CH<sub>2</sub>Cl<sub>2</sub>).

### <Chromatogram>

mAU

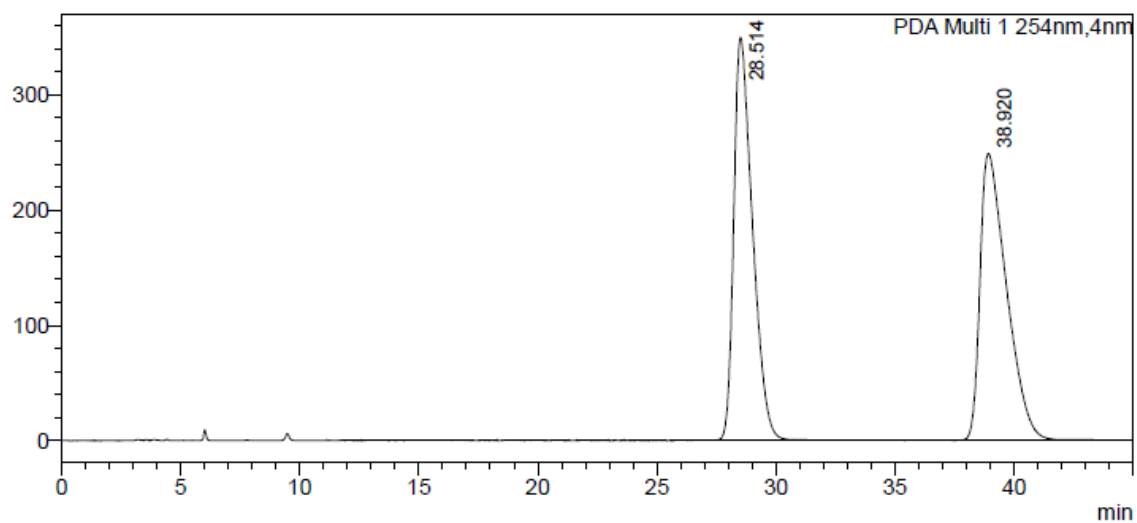

### <Peak Table>

PDA Ch1 254nm

| Peak# | Ret. Time | Area%   |
|-------|-----------|---------|
| 1     | 28.514    | 49.884  |
| 2     | 38.920    | 50.116  |
| Total |           | 100.000 |

### <Chromatogram>

mAU

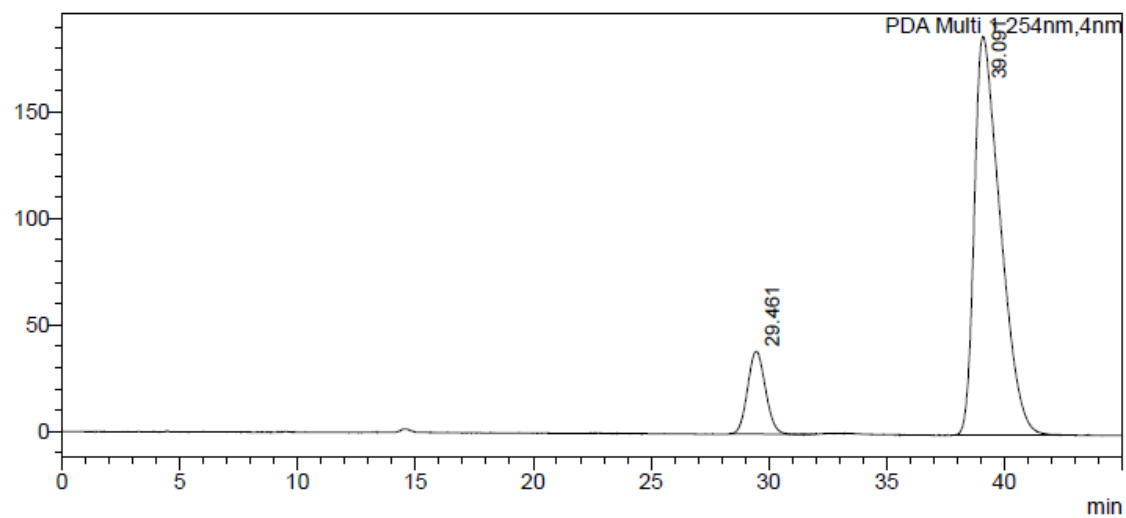

### <Peak Table>

PDA Ch1 254nm

| Peak# | Ret. Time | Area%   |
|-------|-----------|---------|
| 1     | 29.461    | 12.403  |
| 2     | 39.091    | 87.597  |
| Total |           | 100.000 |

**(R)-3-([1,1'-Biphenyl]-4-yl)-N-(pyridin-3-ylmethyl)but-3-en-2-amine 3af**

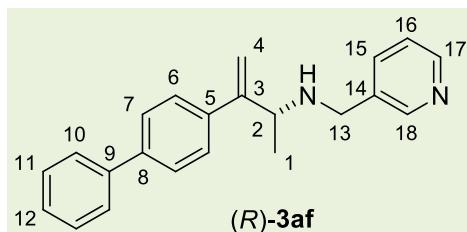

Synthesized at room temperature for 72 h following the general procedure using 4-(buta-1,3-dien-2-yl)-1,1'-biphenyl **1a** (51.6 mg, 0.25 mmol, 1.0 equiv), 3-picolylamine **2f** (114  $\mu$ L, 1.00 mmol, 4.0 equiv), Ni(cod)<sub>2</sub> (3.4 mg, 0.0125 mmol, 5 mol%), (*R,R*)-BenzP\* (4.2 mg, 0.015 mmol, 6 mol%), 2,2,2-trifluoroethanol (19  $\mu$ L, 0.25 mmol, 1.0 equiv) and mesitylene (0.50 mL, 0.5 M). Consumption of **1a**: 94%, conversion of **3af**: 68%, *r.r.* = 7:1. Purification by flash chromatography over silica gel (CH<sub>2</sub>Cl<sub>2</sub>:MeOH = 20:1) led to the desired product as a white solid (64.0 mg, 81% yield, 93% ee).

**<sup>1</sup>H NMR** (400 MHz, CDCl<sub>3</sub>)  $\delta$  (ppm) = 8.58 (d, <sup>4</sup>*J*<sub>HH</sub> = 1.7 Hz, 1H, *H*-18), 8.51 (dd, <sup>3</sup>*J*<sub>HH</sub> = 4.8, <sup>4</sup>*J*<sub>HH</sub> = 1.6 Hz, 1H, *H*-17), 7.67 (dt, <sup>3</sup>*J*<sub>HH</sub> = 7.8, <sup>4</sup>*J*<sub>HH</sub> = 1.9 Hz, 1H, *H*-15), 7.64 – 7.53 (m, 4H, *H*-7+*H*-10), 7.51 – 7.41 (m, 4H, *H*-6+*H*-11), 7.39 – 7.31 (m, 1H, *H*-12), 7.25 (dd, 1H, <sup>3</sup>*J*<sub>HH</sub> = 7.6, 4.8 Hz, 1H, *H*-16), 5.39 (d, <sup>2</sup>*J*<sub>HH</sub> = 1.3 Hz, 1H, *H*-4), 5.35 (s, 1H, *H*-4), 3.90 (d, <sup>2</sup>*J*<sub>HH</sub> = 13.4 Hz, 1H, *H*-13), 3.83 – 3.73 (m, 2H, *H*-2+*H*-13), 1.50 (s, 1H, NH), 1.29 (d, <sup>3</sup>*J*<sub>HH</sub> = 6.6 Hz, 3H, *H*-1).

**<sup>13</sup>C{<sup>1</sup>H} NMR** (100 MHz, CDCl<sub>3</sub>)  $\delta$  (ppm) = 151.3 (C-3), 149.9 (CH-18), 148.6 (CH-17), 140.8 (C-9), 140.5 (C-8), 140.0 (C-5), 136.1 (C-14), 136.0 (CH-15), 128.9 (CH-11), 127.49 (CH-6), 127.45 (CH-12), 127.13 (CH-10), 127.11 (CH-7), 123.5 (CH-16), 113.1 (CH<sub>2</sub>-4), 57.0 (CH-2), 48.8 (CH<sub>2</sub>-13), 21.8 (CH<sub>3</sub>-1).

**m.p.** = 84.1 – 86.4 °C.

**HRMS** (ESI<sup>+</sup>): calculated [M+H]<sup>+</sup> for C<sub>22</sub>H<sub>23</sub>N<sub>2</sub><sup>+</sup>: 315.1856; found: 315.1881.

**IR** (neat)  $\nu$  (cm<sup>-1</sup>): 3291, 3034, 2964, 2927, 2825, 1621, 1579, 1486, 1446, 1423, 1374, 1158, 1128, 1085, 1005, 903, 842, 770, 740, 711, 690.

**HPLC**: 93% ee, chiral stationary column: OJ-H, mobile phase: hexane/*i*PrOH = 85/15, 1.0 mL/min, 254 nm, 30 °C, *t*<sub>R</sub> (minor) = 25.6 min, *t*<sub>R</sub> (major) = 27.8 min.

**[ $\alpha$ ]<sup>20</sup><sub>D</sub>** = +10.7 (c 1.0, CHCl<sub>3</sub>).

### <Chromatogram>

mAU

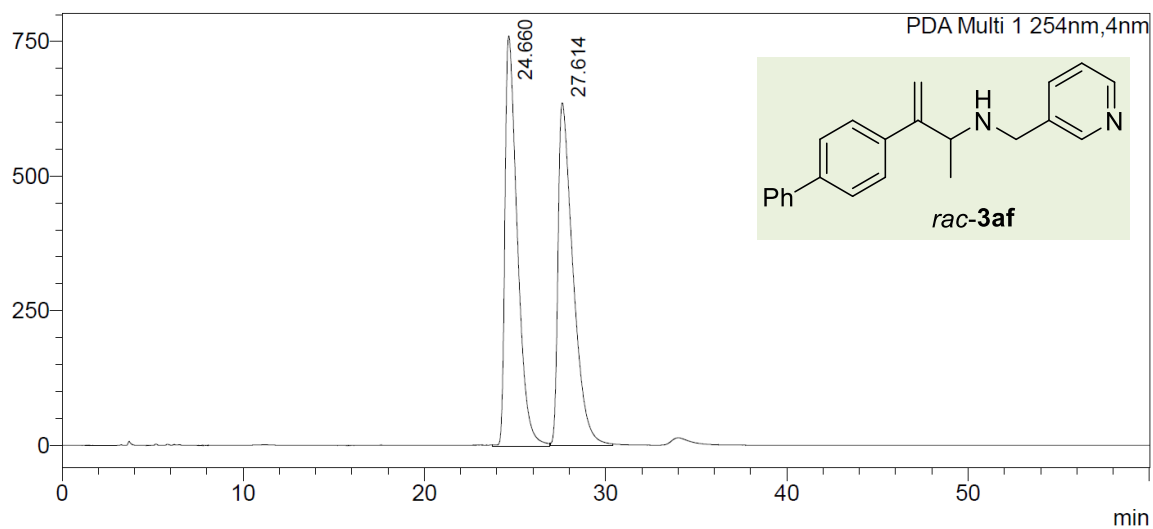

### <Peak Table>

PDA Ch1 254nm

| Peak# | Ret. Time | Area%   |
|-------|-----------|---------|
| 1     | 24.660    | 49.958  |
| 2     | 27.614    | 50.042  |
| Total |           | 100.000 |

### <Chromatogram>

mAU

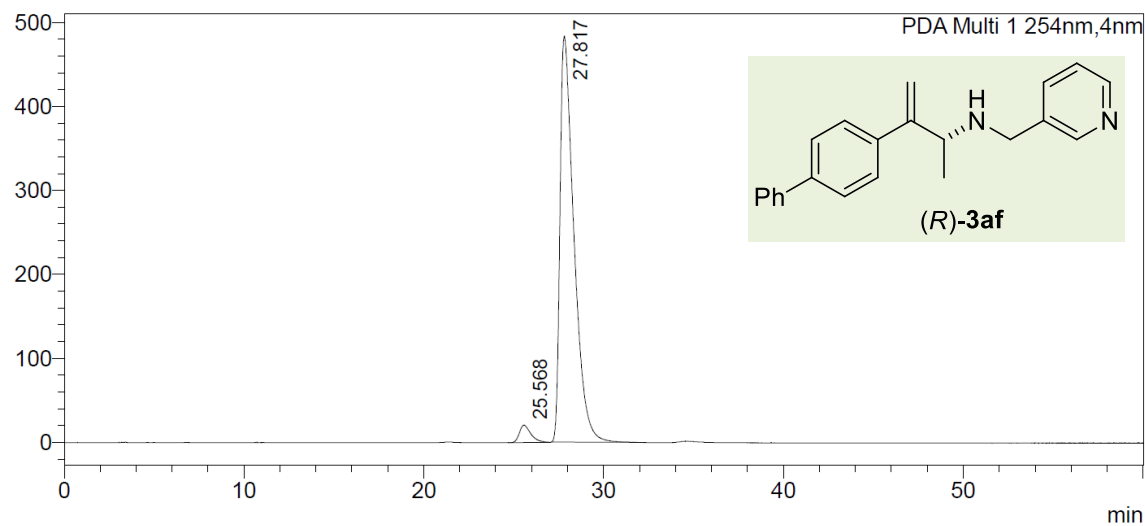

### <Peak Table>

PDA Ch1 254nm

| Peak# | Ret. Time | Area%   |
|-------|-----------|---------|
| 1     | 25.568    | 3.348   |
| 2     | 27.817    | 96.652  |
| Total |           | 100.000 |

**(R)-3-([1,1'-Biphenyl]-4-yl)-N-(furan-2-ylmethyl)but-3-en-2-amine 3ag**

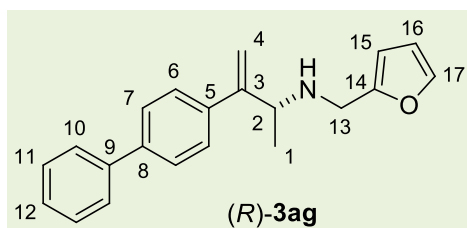

Synthesized at room temperature for 72 h following the general procedure using 4-(buta-1,3-dien-2-yl)-1,1'-biphenyl **1a** (51.6 mg, 0.25 mmol, 1.0 equiv), furfurylamine **2g** (88  $\mu$ L, 1.00 mmol, 4.0 equiv), Ni(cod)<sub>2</sub> (3.4 mg, 0.0125 mmol, 5 mol%), (*R,R*)-BenzP\* (4.2 mg, 0.015 mmol, 6 mol%), 2,2,2-trifluoroethanol (19  $\mu$ L, 0.25 mmol, 1.0 equiv) and mesitylene (0.50 mL, 0.5 M). Consumption of **1a**: 97%, conversion of **3ag**: 80%, *r.r.* = 6:1.

Purification by flash chromatography over silica gel (Pentane:EtOAc = 4:1) led to the desired product as a colorless viscous oil (56.7 mg, 75% yield, 91% ee).

**<sup>1</sup>H NMR** (400 MHz, CDCl<sub>3</sub>)  $\delta$  (ppm) = 7.65 – 7.54 (m, 4H, *H*-7+*H*-10), 7.50 – 7.41 (m, 4H, *H*-6+*H*-11), 7.41 – 7.38 (m, 1H, *H*-17), 7.38 – 7.31 (m, 1H *H*-12), 6.37 – 6.31 (m, 1H, *H*-16), 6.19 (d, <sup>3</sup>*J*<sub>HH</sub> = 3.1 Hz, 1H, *H*-15), 5.38 (s, 1H, *H*-4), 5.35 (s, 1H, *H*-4), 3.89 (d, <sup>2</sup>*J*<sub>HH</sub> = 14.4 Hz, 1H, *H*-13), 3.85 – 3.73 (m, 2H, *H*-2+*H*-13), 1.65 (s, 1H, NH), 1.25 (d, <sup>3</sup>*J*<sub>HH</sub> = 6.5 Hz, 3H, *H*-1).

**<sup>13</sup>C{<sup>1</sup>H} NMR** (100 MHz, CDCl<sub>3</sub>)  $\delta$  (ppm) = 154.3 (C-14), 151.2 (C-3), 141.9 (CH-17), 140.9 (C-9), 140.4 (C-5), 140.2 (C-8), 128.9 (CH-11), 127.5 (CH-6), 127.4 (CH-12), 127.14 (CH-10), 127.07 (CH-7), 113.0 (CH<sub>2</sub>-4), 110.3 (CH-16), 107.0 (CH-15), 56.2 (CH-2), 43.8 (CH<sub>2</sub>-13), 21.7 (CH<sub>3</sub>-1).

**HRMS** (ESI<sup>+</sup>): calculated [M+H]<sup>+</sup> for C<sub>21</sub>H<sub>22</sub>NO<sup>+</sup>: 304.1696; found: 304.1701.

**IR** (neat)  $\nu$  (cm<sup>-1</sup>): 3030, 2965, 2926, 2852, 1810, 1624, 1600, 1505, 1486, 1447, 1401, 1370, 1148, 1074, 1008, 912, 844, 770, 735, 695, 598.

**HPLC**: 91% ee, chiral stationary column: OJ-H, mobile phase: hexane/*i*PrOH = 90/10, 0.50 mL/min, 254 nm, 30 °C, *t*<sub>R</sub> (minor) = 29.1 min, *t*<sub>R</sub> (major) = 30.8 min.

**[ $\alpha$ ]<sup>20</sup><sub>D</sub>** = +11.8 (c 1.0, CHCl<sub>3</sub>).



### <Chromatogram>

mAU

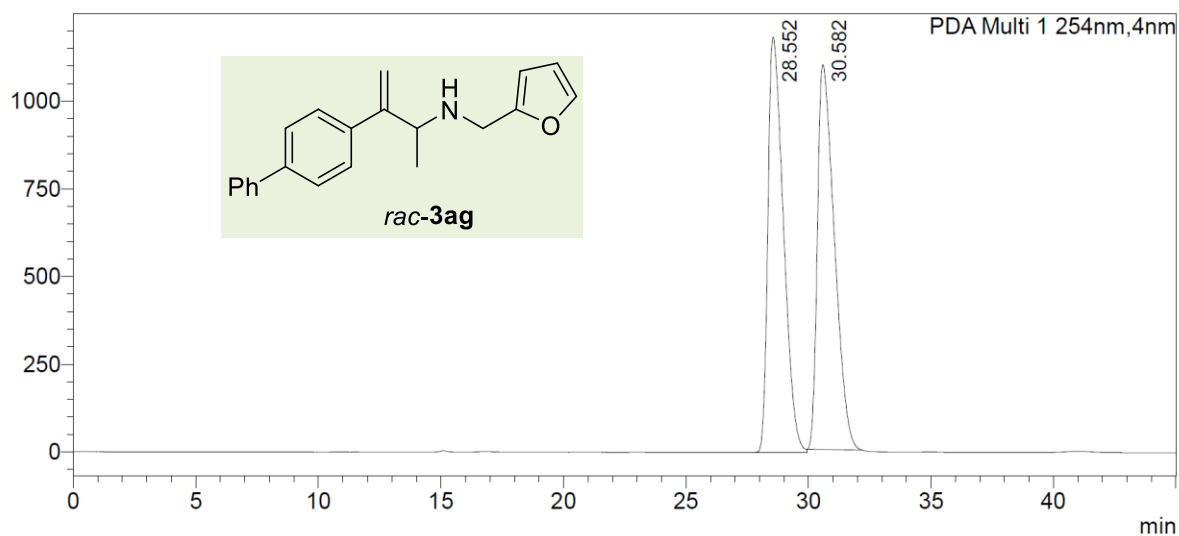

### <Peak Table>

PDA Ch1 254nm

| Peak# | Ret. Time | Area%   |
|-------|-----------|---------|
| 1     | 28.552    | 49.789  |
| 2     | 30.582    | 50.211  |
| Total |           | 100.000 |

### <Chromatogram>

mAU

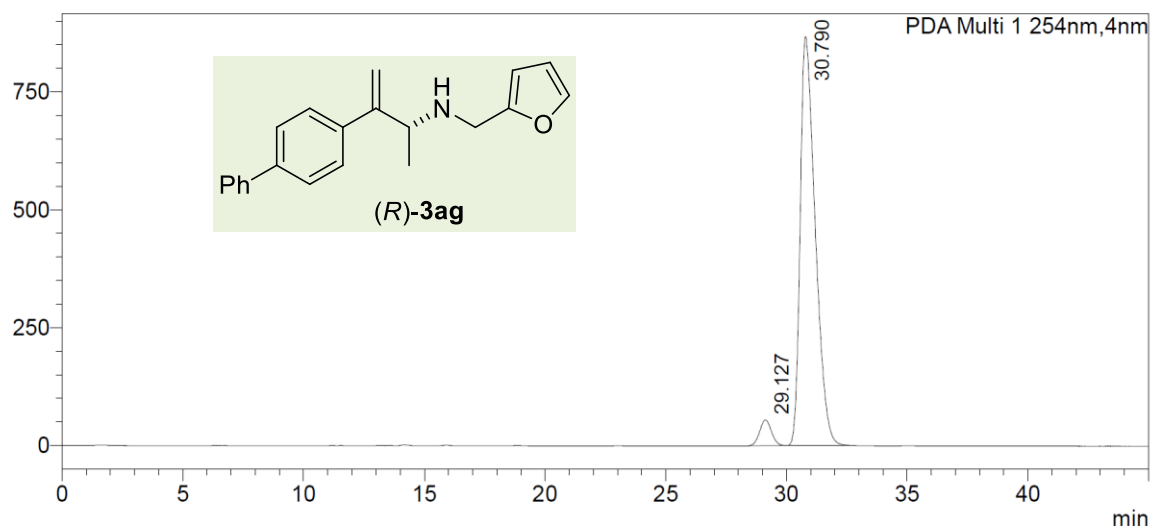

### <Peak Table>

PDA Ch1 254nm

| Peak# | Ret. Time | Area%   |
|-------|-----------|---------|
| 1     | 29.127    | 4.692   |
| 2     | 30.790    | 95.308  |
| Total |           | 100.000 |

**(*R*)-4-(2-((3-([1,1'-Biphenyl]-4-yl)but-3-en-2-yl)amino)ethyl)aniline **3ah****

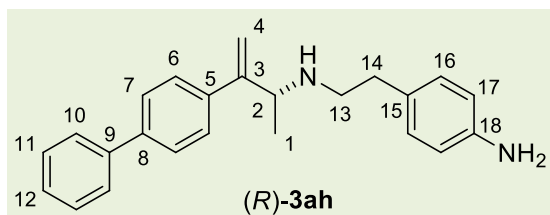

Synthesized at room temperature for 96 h following the general procedure using 4-(buta-1,3-dien-2-yl)-1,1'-biphenyl **1a** (51.6 mg, 0.25 mmol, 1.0 equiv), 4-(2-aminoethyl)aniline **2h** (136 mg, 1.00 mmol, 4.0 equiv), Ni(cod)<sub>2</sub> (3.4

mg, 0.0125 mmol, 5 mol%), (*R,R*)-BenzP\* (4.2 mg, 0.015 mmol, 6 mol%), 2,2,2-trifluoroethanol (19  $\mu$ L, 0.25 mmol, 1.0 equiv) and mesitylene (0.50 mL, 0.5 M). Consumption of **1a**: 99%, conversion of **3ah**: 74%, *r.r.* = 8:1. Purification by flash chromatography over silica gel (Pentane:EtOAc = 1:2, with 0.2% Et<sub>3</sub>N) led to the desired product as a yellow solid (60.6 mg, 71% yield, 87% ee).

**<sup>1</sup>H NMR** (400 MHz, CDCl<sub>3</sub>)  $\delta$  (ppm) = 7.64 – 7.59 (m, 2H, *H*-10), 7.56 – 7.51 (m, 2H, *H*-7), 7.48 – 7.42 (m, 2H, *H*-11), 7.42 – 7.38 (m, 2H, *H*-6), 7.38 – 7.33 (m, 1H, *H*-12), 6.99 (d, <sup>3</sup>*J*<sub>HH</sub> = 8.3 Hz, 2H, *H*-16), 6.68 – 6.54 (m, 2H, *H*-17), 5.29 (d, <sup>2</sup>*J*<sub>HH</sub> = 1.3 Hz, 1H, *H*-4), 5.20 (s, 1H, *H*-4), 3.72 (q, <sup>3</sup>*J*<sub>HH</sub> = 6.5 Hz, 1H, *H*-2), 3.53 (s, 2H, NH<sub>2</sub>), 2.94 – 2.81 (m, 2H, *H*-13), 2.79 – 2.64 (m, 2H, *H*-14), 1.37 (s, 1H, NH), 1.22 (d, <sup>3</sup>*J*<sub>HH</sub> = 6.6 Hz, 3H, *H*-1).

**<sup>13</sup>C{<sup>1</sup>H} NMR** (100 MHz, CDCl<sub>3</sub>)  $\delta$  (ppm) = 151.8 (C-3), 144.7 (C-18), 140.9 (C-9), 140.3 (C-5), 140.2 (C-8), 130.2 (C-15), 129.6 (CH-16), 128.9 (CH-11), 127.5 (CH-6), 127.4 (CH-12), 127.1 (CH-10), 127.0 (CH-7), 115.4 (CH-17), 112.6 (CH<sub>2</sub>-4), 57.4 (CH-2), 49.0 (CH<sub>2</sub>-13), 35.7 (CH<sub>2</sub>-14), 21.6 (CH<sub>3</sub>-1).

**m.p.** = 61.9 – 64.0 °C.

**HRMS** (ESI<sup>+</sup>): calculated [M+H]<sup>+</sup> for C<sub>24</sub>H<sub>27</sub>N<sub>2</sub><sup>+</sup>: 343.2169; found: 343.2211.

**IR** (neat)  $\nu$  (cm<sup>-1</sup>): 3452, 3358, 3204, 3028, 2966, 2924, 2845, 1620, 1515, 1486, 1445, 1369, 1272, 1179, 1149, 1122, 1086, 1007, 907, 843, 819, 770, 739, 695.

**HPLC**: 93% ee, chiral stationary column: AD-H, mobile phase: hexane/*i*PrOH = 97/3, 1.0 mL/min, 254 nm, 30 °C, *t*<sub>R</sub> (minor) = 37.0 min, *t*<sub>R</sub> (major) = 39.7 min.

**[ $\alpha$ ]<sup>20</sup><sub>D</sub>** = +0.2 (c 1.0, CHCl<sub>3</sub>).

### <Chromatogram>

mAU

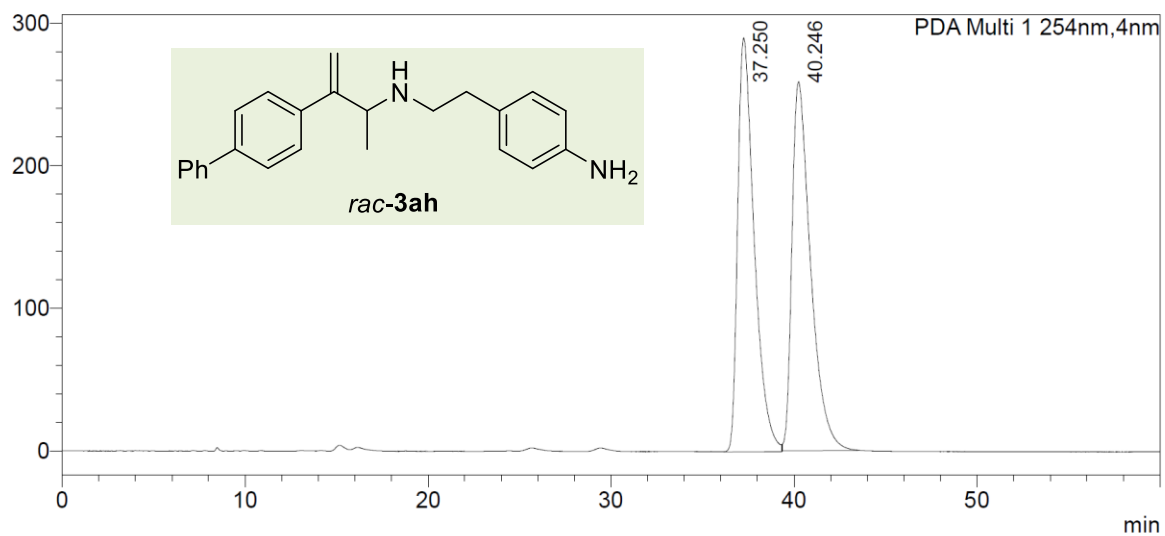

### <Peak Table>

PDA Ch1 254nm

| Peak# | Ret. Time | Area%   |
|-------|-----------|---------|
| 1     | 37.250    | 49.936  |
| 2     | 40.246    | 50.064  |
| Total |           | 100.000 |

### <Chromatogram>

mAU

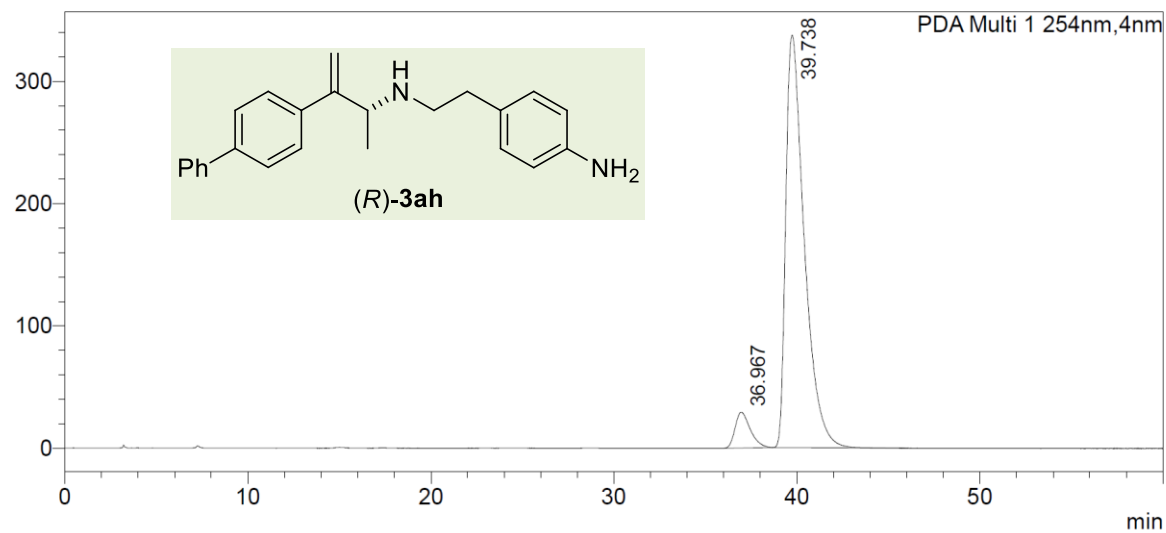

### <Peak Table>

PDA Ch1 254nm

| Peak# | Ret. Time | Area%   |
|-------|-----------|---------|
| 1     | 36.967    | 6.646   |
| 2     | 39.738    | 93.354  |
| Total |           | 100.000 |

**(*R*)-*N*-(3-([1,1'-Biphenyl]-4-yl)but-3-en-2-yl)cyclopentanamine 3ai**

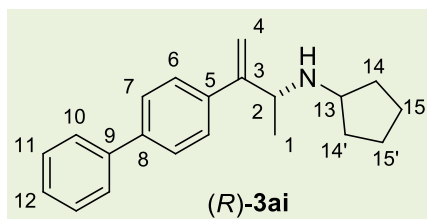

Synthesized at room temperature for 72 h following the general procedure using 4-(buta-1,3-dien-2-yl)-1,1'-biphenyl **1a** (51.6 mg, 0.25 mmol, 1.0 equiv), cyclopentylamine **2i** (99  $\mu$ L, 1.00 mmol, 4.0 equiv), Ni(cod)<sub>2</sub> (3.4 mg, 0.0125 mmol, 5 mol%), (*R,R*)-BenzP\* (4.2 mg, 0.015 mmol, 6 mol%), 2,2,2-trifluoroethanol (19  $\mu$ L, 0.25 mmol, 1.0 equiv) and mesitylene (0.50 mL, 0.5 M). Consumption of **1a**: >99%, conversion of **3ai**: 75%, *r.r.* = 4:1.

Purification by flash chromatography over silica gel (pentane:EtOAc = 1:1) led to the desired product as a yellow viscous oil (55.7 mg, 76% yield, 92% ee).

**<sup>1</sup>H NMR** (400 MHz, CDCl<sub>3</sub>)  $\delta$  (ppm) = 7.64 – 7.54 (m, 4H, *H*-7+*H*-10), 7.50 – 7.41 (m, 4H, *H*-6+*H*-11), 7.38 – 7.31 (m, 1H, *H*-12), 5.32 (s, 1H, *H*-4), 5.30 (s, 1H, *H*-4), 3.80 (q, <sup>3</sup>*J*<sub>HH</sub> = 6.5 Hz, 1H, *H*-2), 3.23 (p, <sup>3</sup>*J*<sub>HH</sub> = 7.0 Hz, 1H, *H*-13), 1.95 – 1.83 (m, 2H, *H*-14), 1.76 – 1.64 (m, 2H, *H*-15), 1.58 – 1.47 (m, 2H, *H*-15), 1.41 – 1.25 (m, 3H, *NH*+*H*-14), 1.24 (d, <sup>3</sup>*J*<sub>HH</sub> = 6.6 Hz, 3H, *H*-1).

**<sup>13</sup>C{<sup>1</sup>H} NMR** (100 MHz, CDCl<sub>3</sub>)  $\delta$  (ppm) = 152.1 (C-3), 140.9 (C-9), 140.4 (C-5), 140.3 (C-8), 128.9 (CH-11), 127.5 (CH-6), 127.4 (CH-12), 127.1 (CH-10), 127.0 (CH-7), 112.6 (CH<sub>2</sub>-4), 57.2 (CH-13), 55.9 (CH-2), 33.7 (CH<sub>2</sub>-14), 33.4 (CH<sub>2</sub>-14), 24.2 (CH<sub>2</sub>-15), 24.0 (CH<sub>2</sub>-15), 22.3 (CH<sub>3</sub>-1).

**HRMS** (ESI<sup>+</sup>): calculated [M+H]<sup>+</sup> for C<sub>21</sub>H<sub>26</sub>N<sup>+</sup>: 292.2060; found: 296.2106.

**IR** (neat)  $\nu$  (cm<sup>-1</sup>): 3030, 2953, 2865, 1625, 1601, 1486, 1447, 1367, 1148, 1084, 1007, 906, 841, 769, 739, 695.

**HPLC**: 92% ee, chiral stationary column: OJ-H, mobile phase: hexane/*i*PrOH = 97/3, 1.0 mL/min, 254 nm, 30 °C, *t*<sub>R</sub> (minor) = 7.2 min, *t*<sub>R</sub> (major) = 8.2 min.

**[ $\alpha$ ]<sup>20</sup><sub>D</sub>** = +1.0 (c 1.0, CHCl<sub>3</sub>).

### <Chromatogram>

mAU

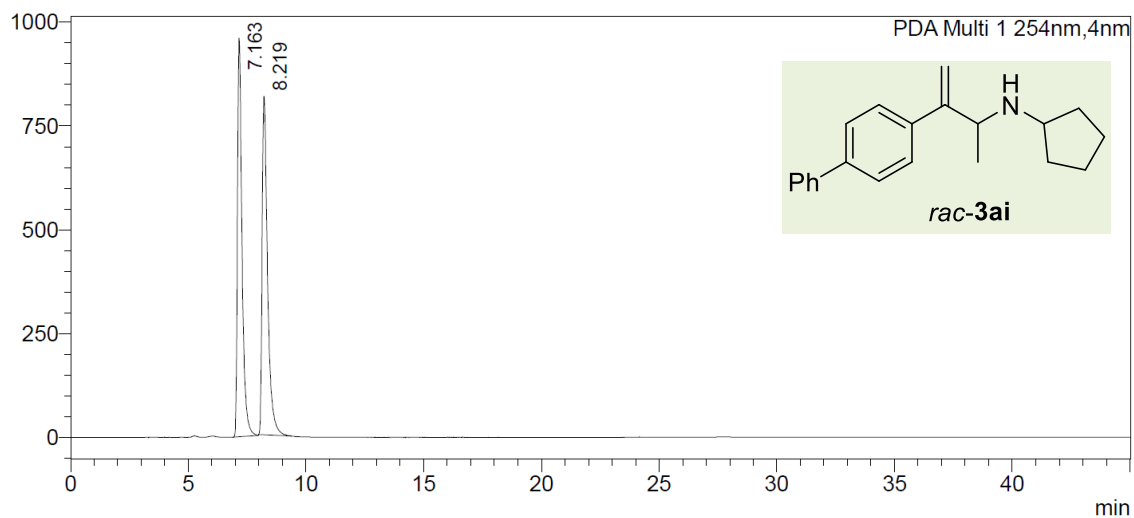

### <Peak Table>

PDA Ch1 254nm

| Peak# | Ret. Time | Area%   |
|-------|-----------|---------|
| 1     | 7.163     | 49.906  |
| 2     | 8.219     | 50.094  |
| Total |           | 100.000 |

### <Chromatogram>

mAU

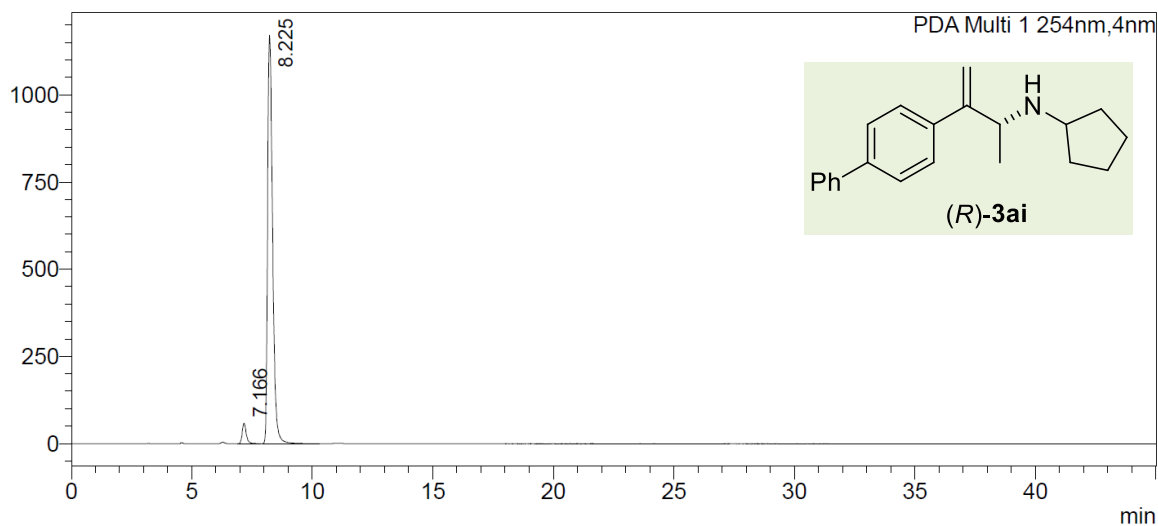

### <Peak Table>

PDA Ch1 254nm

| Peak# | Ret. Time | Area%   |
|-------|-----------|---------|
| 1     | 7.166     | 3.866   |
| 2     | 8.225     | 96.134  |
| Total |           | 100.000 |

**(R)-N-(3-([1,1'-Biphenyl]-4-yl)but-3-en-2-yl)cyclohexanamine **3aj****

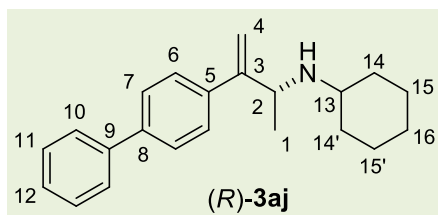

Synthesized at room temperature for 96 h following the general procedure using 4-(buta-1,3-dien-2-yl)-1,1'-biphenyl **1a** (51.6 mg, 0.25 mmol, 1.0 equiv), cyclohexylamine **2j** (114  $\mu$ L, 1.00 mmol, 4.0 equiv), Ni(cod)<sub>2</sub> (3.4 mg, 0.0125 mmol, 5 mol%), (*R,R*)-BenzP\* (4.2 mg, 0.015 mmol, 6 mol%), 2,2,2-trifluoroethanol (19  $\mu$ L, 0.25 mmol, 1.0 equiv) and mesitylene (0.50 mL, 0.5 M). Consumption of **1a**: 94%, conversion of **3aj**: 68%, *r.r.* = 3:1.

Purification by flash chromatography over silica gel (pentane:EtOAc = 2:1) led to the desired product as a colorless viscous oil (50.2 mg, 66% yield, 92% ee).

**<sup>1</sup>H NMR** (400 MHz, CDCl<sub>3</sub>)  $\delta$  (ppm) = 7.66 – 7.54 (m, 4H, *H*-7+*H*-10), 7.50 – 7.40 (m, 4H, *H*-6+*H*-11), 7.39 – 7.30 (m, 1H, *H*-12), 5.31 (d, <sup>2</sup>*J*<sub>HH</sub> = 0.8 Hz, 1H, *H*-4), 5.26 (s, 1H, *H*-4), 3.92 (q, <sup>3</sup>*J*<sub>HH</sub> = 6.5 Hz, 1H, *H*-2), 2.65 – 2.51 (m, 1H, *H*-13), 2.05 – 1.93 (m, 1H, *H*-14), 1.89 – 1.79 (m, 1H, *H*-14), 1.78 – 1.67 (m, 2H, *H*-15+*H*-15), 1.66 – 1.56 (m, 1H, *H*-16), 1.32 – 1.04 (m, 6H, *NH*+*H*-14+*H*-14'+*H*-15+*H*-15'+*H*-16), 1.22 (d, <sup>3</sup>*J*<sub>HH</sub> = 6.6 Hz, 3H, *H*-1).

**<sup>13</sup>C{<sup>1</sup>H} NMR** (100 MHz, CDCl<sub>3</sub>)  $\delta$  (ppm) = 152.2 (C-3), 140.9 (C-9), 140.4 (C-5), 140.2 (C-8), 128.9 (CH-11), 127.5 (CH-6), 127.4 (CH-12), 127.1 (CH-10), 127.0 (CH-7), 112.5 (CH<sub>2</sub>-4), 53.81 (CH-2 or CH-13), 53.77 (CH-13 or CH-2), 34.4 (CH<sub>2</sub>-14), 33.7 (CH<sub>2</sub>-14), 26.3 (CH<sub>2</sub>-16), 25.5 (CH<sub>2</sub>-15), 25.2 (CH<sub>2</sub>-15), 22.5 (CH<sub>3</sub>-1).

**HRMS** (ESI<sup>+</sup>): calculated [M+H]<sup>+</sup> for C<sub>22</sub>H<sub>28</sub>N<sup>+</sup>: 306.2217; found: 306.2249.

**IR** (neat)  $\nu$  (cm<sup>-1</sup>): 2924, 2851, 1601, 1486, 1447, 1368, 1276, 1261, 1132, 1084, 1007, 906, 842, 765, 749, 695.

**HPLC**: 92% ee, chiral stationary column: OJ-H, mobile phase: hexane/*i*PrOH = 97/3, 1.0 mL/min, 254 nm, 30 °C, *t*<sub>R</sub> (minor) = 6.4 min, *t*<sub>R</sub> (major) = 7.7 min.

**[ $\alpha$ ]<sup>20</sup><sub>D</sub>** = -5.6 (c 1.0, CHCl<sub>3</sub>).

### <Chromatogram>

mAU

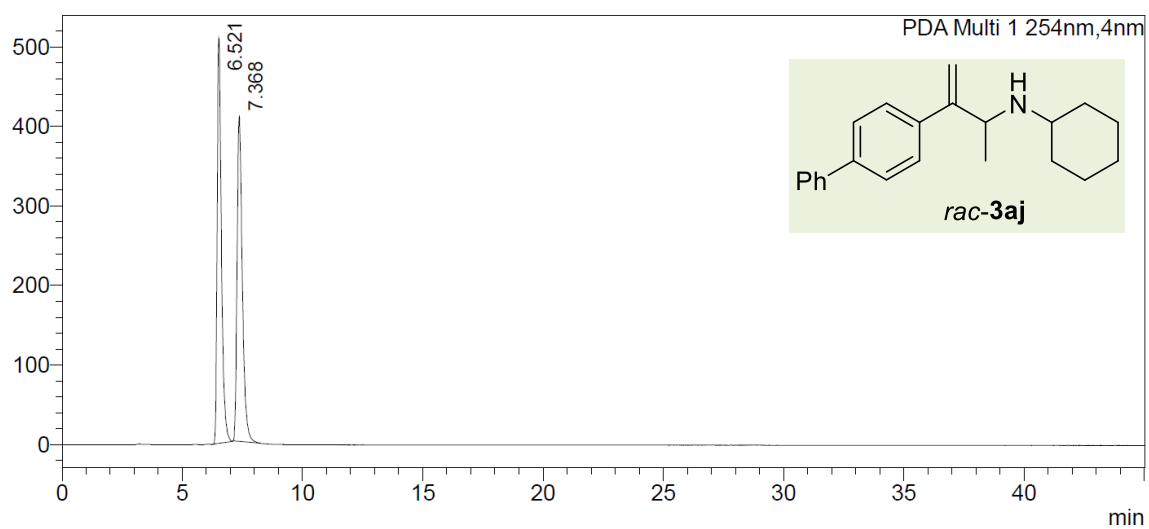

### <Peak Table>

PDA Ch1 254nm

| Peak# | Ret. Time | Area%   |
|-------|-----------|---------|
| 1     | 6.521     | 50.047  |
| 2     | 7.368     | 49.953  |
| Total |           | 100.000 |

### <Chromatogram>

mAU

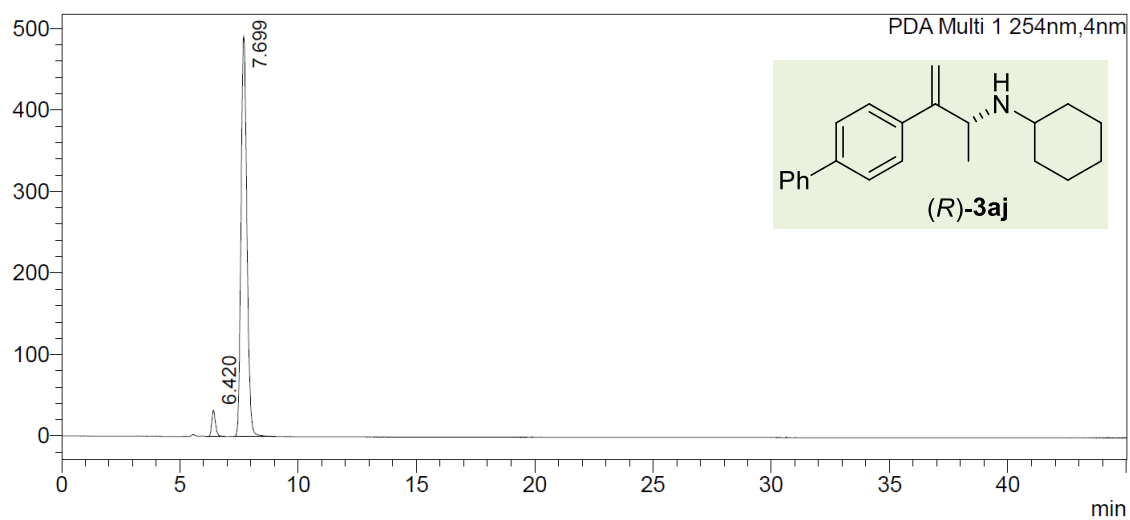

### <Peak Table>

PDA Ch1 254nm

| Peak# | Ret. Time | Area%   |
|-------|-----------|---------|
| 1     | 6.420     | 3.964   |
| 2     | 7.699     | 96.036  |
| Total |           | 100.000 |

### 3-([1,1'-Biphenyl]-4-yl)-N-((S)-1-phenylethyl)but-3-en-2-amine **3ak+3al**

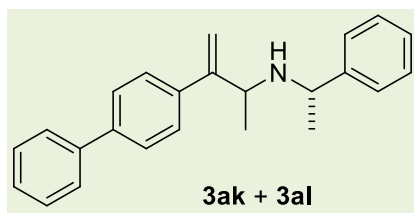

Synthesized at room temperature for 24 h following the general racemic procedure using 4-(buta-1,3-dien-2-yl)-1,1'-biphenyl **1a** (20.6 mg, 0.10 mmol, 1.0 equiv), (S)-1-phenylethylamine **2k** (52  $\mu$ L, 1.00 mmol, 4.0 equiv), Ni(cod)<sub>2</sub> (1.4 mg, 0.005 mmol, 5 mol%), H,H-Cy-Phox (1.7 mg, 0.005 mmol, 5 mol%), 2,2,2-trifluoroethanol (7.5  $\mu$ L, 0.10 mmol, 1.0 equiv) and mesitylene (0.2 mL, 0.5 M). Consumption of **1a**: >99%, conversion of **3ak+3al**: 86%, *r.r.* > 19:1, *d.r.* = 1.05:1. Purification by flash chromatography over silica gel (Pentane:EtOAc = 6:1) led to the desired product as a colorless viscous oil. *Diastereomeric ratio (d.r.)* was calculated by integration of non isochronic signals of <sup>1</sup>H NMR of crude reaction mixture ( $\delta$  = 3.60 ppm and 3.40 ppm).

### (R)-3-([1,1'-Biphenyl]-4-yl)-N-((S)-1-phenylethyl)but-3-en-2-amine **3ak**

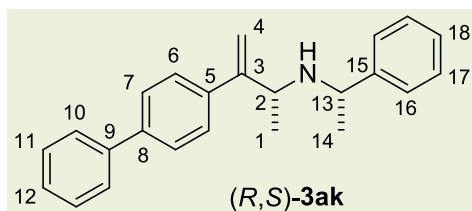

Synthesized at room temperature for 144 h following the general procedure using 4-(buta-1,3-dien-2-yl)-1,1'-biphenyl **1a** (51.6 mg, 0.25 mmol, 1.0 equiv), (S)-1-phenylethylamine **2k** (129  $\mu$ L, 1.00 mmol, 4.0 equiv), Ni(cod)<sub>2</sub> (3.4 mg, 0.0125 mmol, 5 mol%), (R,R)-BenzP\* (4.2 mg, 0.015 mmol, 6 mol%), 2,2,2-trifluoroethanol (19  $\mu$ L, 0.25 mmol, 1.0 equiv) and mesitylene (0.50 mL, 0.5 M). Consumption of **1a**: 94%, conversion of **3ak**: 61%, *r.r.* = 3:1, *d.r.* = 19:1. Purification by flash chromatography over silica gel (Pentane:EtOAc = 6:1) led to the desired product as a colorless viscous oil (49.4 mg, 60% yield, 19:1 *d.r.*).

<sup>1</sup>H NMR (400 MHz, CDCl<sub>3</sub>)  $\delta$  (ppm) = 7.56 – 7.49 (m, 2H, *H*-10), 7.47 – 7.41 (m, 2H, *H*-7), 7.40 – 7.33 (m, 2H, *H*-11), 7.30 – 7.16 (m, 8H, *H*-6+*H*-12+*H*-16+*H*-17+*H*-18), 5.24 (d, <sup>2</sup>*J*<sub>HH</sub> = 1.0 Hz, 1H, *H*-4), 5.21 (d, <sup>2</sup>*J*<sub>HH</sub> = 1.0 Hz, 1H, *H*-4), 3.88 (q, <sup>3</sup>*J*<sub>HH</sub> = 6.6 Hz, 1H, *H*-13), 3.60 (q, <sup>3</sup>*J*<sub>HH</sub> = 6.3 Hz, 1H, *H*-2), 1.41 (s, 1H, *NH*), 1.30 (d, <sup>3</sup>*J*<sub>HH</sub> = 6.6 Hz, 3H, *H*-14), 1.18 (d, <sup>3</sup>*J*<sub>HH</sub> = 6.5 Hz, 3H, *H*-1).

<sup>13</sup>C{<sup>1</sup>H} NMR (100 MHz, CDCl<sub>3</sub>)  $\delta$  (ppm) = 152.4 (C-3), 145.8 (C-15), 140.9 (C-9), 140.29 (C-5), 140.26 (C-8), 128.9 (CH-11), 128.6 (CH-17), 127.5 (CH-6), 127.4 (CH-12), 127.1 (CH-10), 127.05 (CH-18), 126.99 (CH-7), 126.8 (CH-16), 112.5 (CH<sub>2</sub>-4), 55.0 (CH-13), 53.5 (CH-2), 24.0 (CH<sub>3</sub>-14), 20.7 (CH<sub>3</sub>-1).

HRMS (ESI<sup>+</sup>): calculated [M+H]<sup>+</sup> for C<sub>24</sub>H<sub>26</sub>N<sup>+</sup>: 328.2060; found: 328.2081.

IR (neat)  $\nu$  (cm<sup>-1</sup>): 3060, 3028, 2966, 2926, 2864, 1624, 1601, 1487, 1449, 1369, 1130, 1076, 1007, 907, 843, 766, 740, 697.

[ $\alpha$ ]<sub>D</sub><sup>20</sup> = +23.5 (c 1.0, CHCl<sub>3</sub>).



**(*R*)-3-([1,1'-Biphenyl]-4-yl)-N-((*R*)-1-phenylethyl)but-3-en-2-amine **3aI****

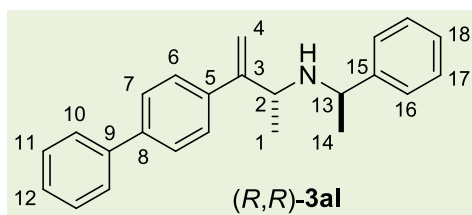

Synthesized at room temperature for 144 h following the general procedure using 4-(buta-1,3-dien-2-yl)-1,1'-biphenyl **1a** (51.6 mg, 0.25 mmol, 1.0 equiv), (*R*)-1-phenylethylamine **2I** (129  $\mu$ L, 1.00 mmol, 4.0 equiv), Ni(cod)<sub>2</sub> (3.4 mg, 0.0125 mmol, 5 mol%), (*R,R*)-

BenzP\* (4.2 mg, 0.015 mmol, 6 mol%), 2,2,2-trifluoroethanol (19  $\mu$ L, 0.25 mmol, 1.0 equiv) and mesitylene (0.50 mL, 0.5 M). Consumption of **1a**: 84%, conversion of **3aI**: 56%, *r.r.* = 3:1, *d.r.* = 17:1. Purification by flash chromatography over silica gel (Pentane:EtOAc = 8:1) led to the desired product as a colorless viscous oil (44.2 mg, 54% yield, 17:1 *d.r.*).

**<sup>1</sup>H NMR** (400 MHz, CDCl<sub>3</sub>)  $\delta$  (ppm) = 7.57 – 7.49 (m, 2H, *H*-10), 7.48 – 7.41 (m, 2H, *H*-7), 7.40 – 7.33 (m, 2H, *H*-11), 7.31 – 7.15 (m, 8H, *H*-6+*H*-12+*H*-16+*H*-17+*H*-18), 5.24 (d, <sup>2</sup>*J*<sub>HH</sub> = 0.8 Hz, 1H, *H*-4), 5.13 (s, 1H, *H*-4), 3.86 (q, <sup>3</sup>*J*<sub>HH</sub> = 6.6 Hz, 1H, *H*-13), 3.40 (q, <sup>3</sup>*J*<sub>HH</sub> = 6.6 Hz, 1H, *H*-2), 1.44 (s, 1H, *NH*), 1.28 (d, <sup>3</sup>*J*<sub>HH</sub> = 6.7 Hz, 3H, *H*-14), 1.04 (d, <sup>3</sup>*J*<sub>HH</sub> = 6.6 Hz, 3H, *H*-1).

**<sup>13</sup>C{<sup>1</sup>H} NMR** (100 MHz, CDCl<sub>3</sub>)  $\delta$  (ppm) = 151.8 (C-3), 146.2 (C-15), 140.9 (C-9), 140.5 (C-5), 140.2 (C-8), 128.9 (CH-11), 128.6 (CH-17), 127.6 (CH-6), 127.4 (CH-12), 127.1 (CH-10), 127.05 (CH-18), 126.98 (CH-7), 126.9 (CH-16), 112.5 (CH<sub>2</sub>-4), 55.2 (CH-13), 55.0 (CH-2), 25.1 (CH<sub>3</sub>-14), 22.9 (CH<sub>3</sub>-1).

**HRMS** (ESI<sup>+</sup>): calculated [M+H]<sup>+</sup> for C<sub>24</sub>H<sub>26</sub>N<sup>+</sup>: 328.2060; found: 328.2081.

**IR** (neat)  $\nu$  (cm<sup>-1</sup>): 3060, 3028, 2962, 2924, 2864, 1625, 1601, 1487, 1448, 1369, 1133, 1079, 1007, 908, 842, 764, 740, 697.

**[ $\alpha$ ]<sup>20</sup><sub>D</sub>** = +28.8 (*c* 1.0, CHCl<sub>3</sub>).

**(*R*)-1-(3-([1,1'-Biphenyl]-4-yl)but-3-en-2-yl)pyrrolidine 3am**

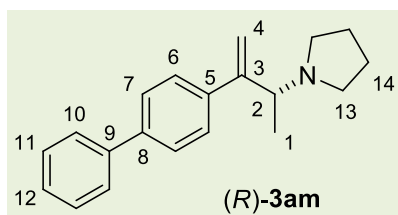

Synthesized at room temperature for 72 h using diphenylphosphinic acid as additive following the general procedure using 4-(buta-1,3-dien-2-yl)-1,1'-biphenyl **1a** (51.6 mg, 0.25 mmol, 1.0 equiv), pyrrolidine **2m** (84  $\mu$ L, 1.00 mmol, 4.0 equiv), Ni(cod)<sub>2</sub> (3.4 mg, 0.0125 mmol, 5 mol%),

(*R,R*)-BenzP\* (4.2 mg, 0.015 mmol, 6 mol%), diphenylphosphinic acid (10.9 mg, 0.05 mmol, 0.20 equiv) and mesitylene (0.50 mL, 0.5 M). Consumption of **1a**: >99%, conversion of **3am**: 67%, *r.r.* = 1.9:1. Purification by flash chromatography over silica gel (Pentane:EtOAc = 2:1) led to the desired product as a colorless oil (44.5 mg, 64% yield, 95% ee).

**<sup>1</sup>H NMR** (400 MHz, CDCl<sub>3</sub>)  $\delta$  (ppm) = 7.67 – 7.59 (m, 4H, *H*-6+*H*-10), 7.58 – 7.53 (m, 2H, *H*-7), 7.48 – 7.39 (m, 2H, *H*-11), 7.34 (t, <sup>3</sup>*J*<sub>HH</sub> = 7.3 Hz, 1H, *H*-12), 5.34 (s, 2H, *H*-4), 3.19 (q, <sup>3</sup>*J*<sub>HH</sub> = 6.5 Hz, 1H, *H*-2), 2.70 – 2.54 (m, 4H, *H*-13), 1.86 – 1.75 (m, 4H, *H*-14), 1.27 (d, <sup>3</sup>*J*<sub>HH</sub> = 6.5 Hz, 3H, *H*-1).

**<sup>13</sup>C{<sup>1</sup>H} NMR** (100 MHz, CDCl<sub>3</sub>)  $\delta$  (ppm) = 151.8 (C-3), 141.1 (C-9), 140.4 (C-5), 140.2 (C-8), 128.9 (CH-11), 127.7 (CH-6), 127.3 (CH-12), 127.1 (CH-10), 126.9 (CH-7), 114.2 (CH<sub>2</sub>-4), 65.9 (CH-2), 52.8 (CH<sub>2</sub>-13), 23.7 (CH<sub>2</sub>-14), 21.0 (CH<sub>3</sub>-1).

**HRMS** (ESI<sup>+</sup>): calculated [M+H]<sup>+</sup> for C<sub>20</sub>H<sub>24</sub>N<sup>+</sup>: 278.1904; found: 278.2004.

**IR** (neat)  $\nu$  (cm<sup>-1</sup>): 3029, 2967, 2927, 2873, 2782, 1678, 1624, 1601, 1486, 1449, 1370, 1314, 1196, 1142, 1076, 1007, 906, 843, 770, 741, 695.

**HPLC**: 95% ee, chiral stationary column: OJ-H, mobile phase: hexane/*i*PrOH = 98/2, 1.0 mL/min, 254 nm, 30 °C, *t*<sub>R</sub> (minor) = 6.7 min, *t*<sub>R</sub> (major) = 7.5 min.

**[ $\alpha$ ]<sup>20</sup><sub>D</sub>** = +49.7 (*c* 1.0, CHCl<sub>3</sub>).

### <Chromatogram>

mAU

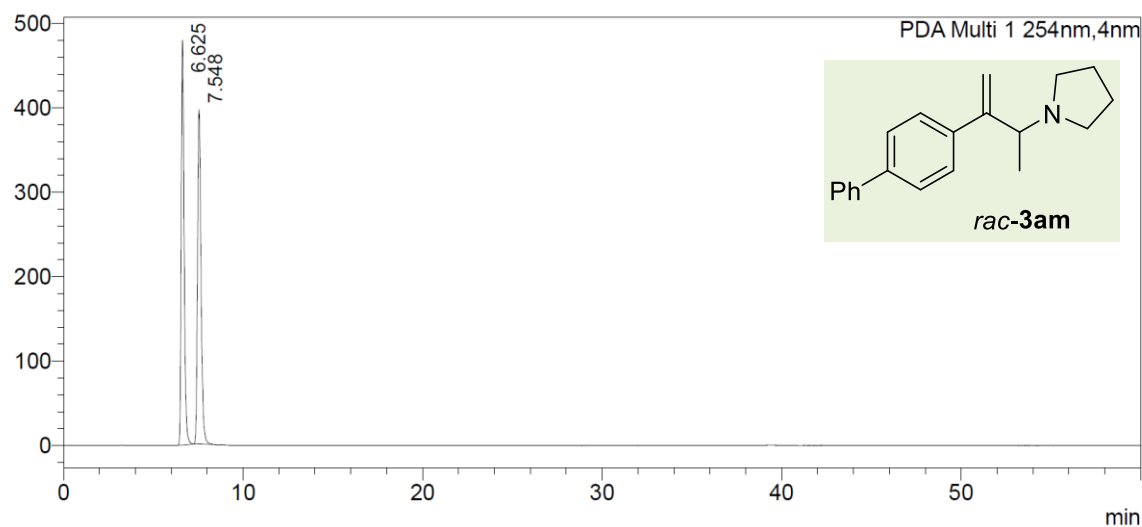

### <Peak Table>

PDA Ch1 254nm

| Peak# | Ret. Time | Area%   |
|-------|-----------|---------|
| 1     | 6.625     | 49.956  |
| 2     | 7.548     | 50.044  |
| Total |           | 100.000 |

### <Chromatogram>

mAU

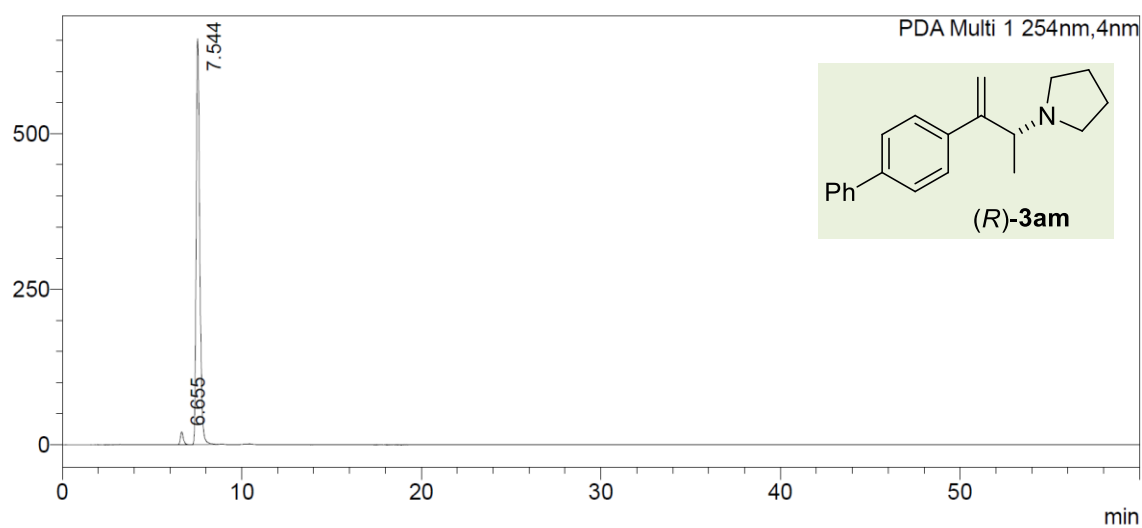

### <Peak Table>

PDA Ch1 254nm

| Peak# | Ret. Time | Area%   |
|-------|-----------|---------|
| 1     | 6.655     | 2.543   |
| 2     | 7.544     | 97.457  |
| Total |           | 100.000 |

**(*R*)-1-(3-([1,1'-Biphenyl]-4-yl)but-3-en-2-yl)piperidine 3an**

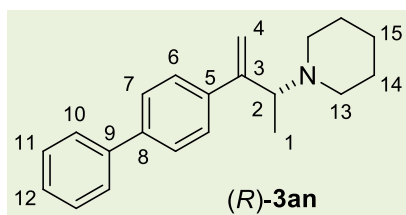

Synthesized at room temperature for 72 h using diphenylphosphinic acid as additive following the general procedure using 4-(buta-1,3-dien-2-yl)-1,1'-biphenyl **1a** (51.6 mg, 0.25 mmol, 1.0 equiv), piperidine **2n** (99  $\mu$ L, 1.00 mmol, 4.0 equiv), Ni(cod)<sub>2</sub> (3.4 mg, 0.0125 mmol, 5 mol%),

(*R,R*)-BenzP\* (4.2 mg, 0.015 mmol, 6 mol%), diphenylphosphinic acid (10.9 mg, 0.05 mmol, 0.2 equiv) and mesitylene (0.50 mL, 0.5 M). Consumption of **1a**: >99%, conversion of **3an**: 50%, *r.r.* = 1.0:1. Purification by flash chromatography over silica gel (Pentane:EtOAc = 6:1) led to the desired product as a colorless viscous oil (34.9 mg, 48% yield, >95% ee).

**<sup>1</sup>H NMR** (400 MHz, CDCl<sub>3</sub>)  $\delta$  (ppm) = 7.68 – 7.58 (m, 4H, *H*-6+*H*-10), 7.58 – 7.51 (m, 2H, *H*-7), 7.48 – 7.40 (m, 2H, *H*-11), 7.34 (t, <sup>3</sup>*J*<sub>HH</sub> = 7.3 Hz, 1H, *H*-12), 5.39 (s, 1H, *H*-4), 5.25 (s, 1H, *H*-4), 3.39 (q, <sup>3</sup>*J*<sub>HH</sub> = 6.6 Hz, 1H, *H*-2), 2.66 – 2.35 (m, 4H, *H*-13), 1.62 – 1.49 (m, 4H, *H*-14), 1.48 – 1.39 (m, 2H, *H*-15), 1.21 (d, <sup>3</sup>*J*<sub>HH</sub> = 6.6 Hz, 3H, *H*-1).

**<sup>13</sup>C{<sup>1</sup>H} NMR** (100 MHz, CDCl<sub>3</sub>)  $\delta$  (ppm) = 150.8 (C-3), 141.1 (C-5+C-9), 140.0 (C-8), 128.9 (CH-11), 127.7 (CH-6), 127.3 (CH-12), 127.1 (CH-10), 126.8 (CH-7), 114.0 (CH<sub>2</sub>-4), 64.6 (CH-2), 51.3 (CH<sub>2</sub>-13), 26.6 (CH<sub>2</sub>-14), 25.0 (CH<sub>2</sub>-15), 16.4 (CH<sub>3</sub>-1).

**HRMS** (ESI<sup>+</sup>): calculated [M+H]<sup>+</sup> for C<sub>21</sub>H<sub>26</sub>N<sup>+</sup>: 292.2060; found: 292.2176.

**IR** (neat)  $\nu$  (cm<sup>-1</sup>): 3032, 2929, 2852, 2795, 2751, 1622, 1601, 1486, 1445, 1373, 1321, 1153, 1116, 1036, 1007, 947, 905, 842, 768, 739, 695.

**SFC**: >95% ee, chiral stationary phase: AD column, gradient elution from 30% to 40% MeOH (12 min), 3 ml/min, 210 nm, *t*<sub>R</sub> (minor) = 5.2 min, *t*<sub>R</sub> (major) = 5.8 min.

**[ $\alpha$ ]<sup>20</sup><sub>D</sub>** = +38.6 (*c* 1.0, CHCl<sub>3</sub>).

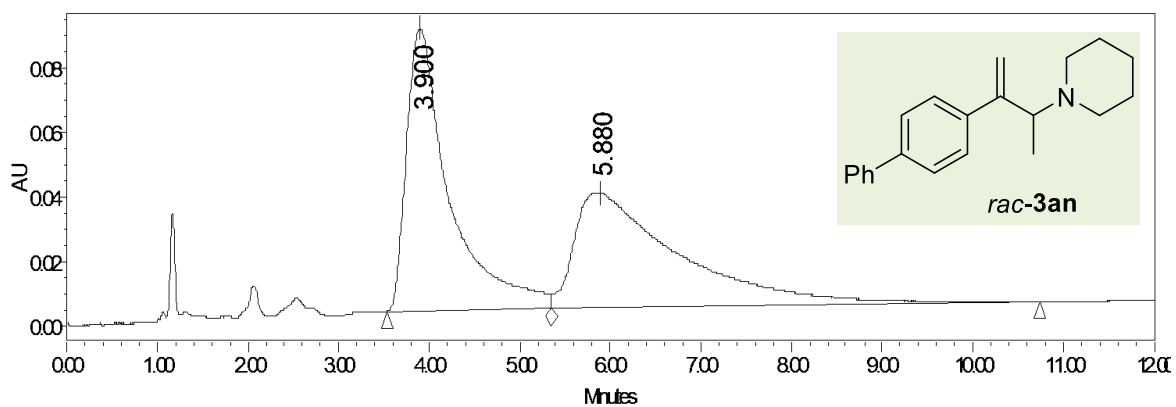

|   | Retention Time | Area    | % Area |
|---|----------------|---------|--------|
| 1 | 3.900          | 2873903 | 49.78  |
| 2 | 5.880          | 2899812 | 50.22  |

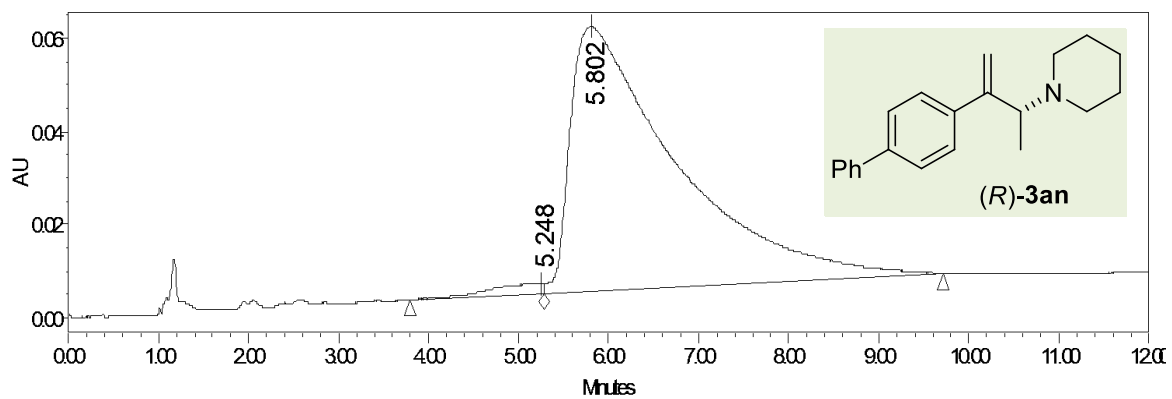

|   | Retention Time | Area    | % Area |
|---|----------------|---------|--------|
| 1 | 5.248          | 84592   | 1.79   |
| 2 | 5.802          | 4644243 | 98.21  |

**(*R*)-4-(3-([1,1'-Biphenyl]-4-yl)but-3-en-2-yl)morpholine **3ao****

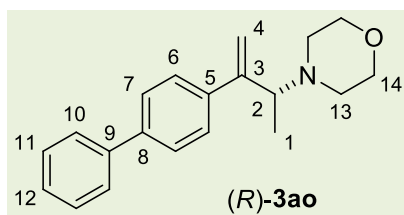

Synthesized at room temperature for 24 h using diphenylphosphinic acid as additive following the general procedure using 4-(buta-1,3-dien-2-yl)-1,1'-biphenyl **1a** (51.6 mg, 0.25 mmol, 1.0 equiv), morpholine **2o** (88  $\mu$ L, 1.00 mmol, 4.0 equiv), Ni(cod)<sub>2</sub> (3.4 mg, 0.0125 mmol, 5

mol%), (*R,R*)-BenzP\* (4.2 mg, 0.015 mmol, 6 mol%), diphenylphosphinic acid (10.9 mg, 0.05 mmol, 0.2 equiv) and mesitylene (0.50 mL, 0.5 M). Consumption of **1a**: >99%, conversion of **3ao**: 56%, *r.r.* = 1.2:1. Purification by flash chromatography over silica gel (Pentane:EtOAc = 6:1) led to the desired product as a colorless viscous oil (40.2 mg, 55% yield, 95% *ee*).

**<sup>1</sup>H NMR** (400 MHz, CDCl<sub>3</sub>)  $\delta$  (ppm) = 7.70 – 7.62 (m, 4H, *H*-6+*H*-10), 7.62 – 7.56 (m, 2H, *H*-7), 7.51 – 7.43 (m, 2H, *H*-11), 7.41 – 7.34 (m, 1H, *H*-12), 5.45 (d, <sup>2</sup>*J*<sub>HH</sub> = 1.2 Hz, 1H, *H*-4), 5.31 (s, 1H, *H*-4), 3.82 – 3.68 (m, 4H, *H*-14), 3.36 (q, <sup>3</sup>*J*<sub>HH</sub> = 6.5 Hz, 1H, *H*-2), 2.68 – 2.51 (m, 4H, *H*-13), 1.25 (d, <sup>3</sup>*J*<sub>HH</sub> = 6.6 Hz, 3H, *H*-1).

**<sup>13</sup>C{<sup>1</sup>H} NMR** (100 MHz, CDCl<sub>3</sub>)  $\delta$  (ppm) = 149.9 (C-3), 141.0 (C-9), 140.3 (C-5+C-8), 128.9 (CH-11), 127.6 (CH-6), 127.4 (CH-12), 127.1 (CH-10), 126.9 (CH-7), 114.9 (CH<sub>2</sub>-4), 67.5 (CH<sub>2</sub>-14), 65.1 (CH-2), 51.0 (CH<sub>2</sub>-13), 16.8 (CH<sub>3</sub>-1).

**HRMS** (ESI<sup>+</sup>): calculated [M+H]<sup>+</sup> for C<sub>20</sub>H<sub>24</sub>NO<sup>+</sup>: 294.1853; found: 294.1896.

**IR** (neat)  $\nu$  (cm<sup>-1</sup>): 3030, 2958, 2851, 2805, 1623, 1600, 1487, 1449, 1373, 1320, 1142, 1117, 1071, 1008, 955, 911, 845, 771, 741, 697.

**HPLC**: 95% *ee*, chiral stationary column: OJ-H, mobile phase: hexane/*i*PrOH = 95/5, 1.0 mL/min, 254 nm, 30 °C, *t*<sub>R</sub> (minor) = 21.6 min, *t*<sub>R</sub> (major) = 30.9 min.

**[ $\alpha$ ]<sup>20</sup><sub>D</sub>** = +52.4 (c 1.0, CHCl<sub>3</sub>).

### <Chromatogram>

mAU

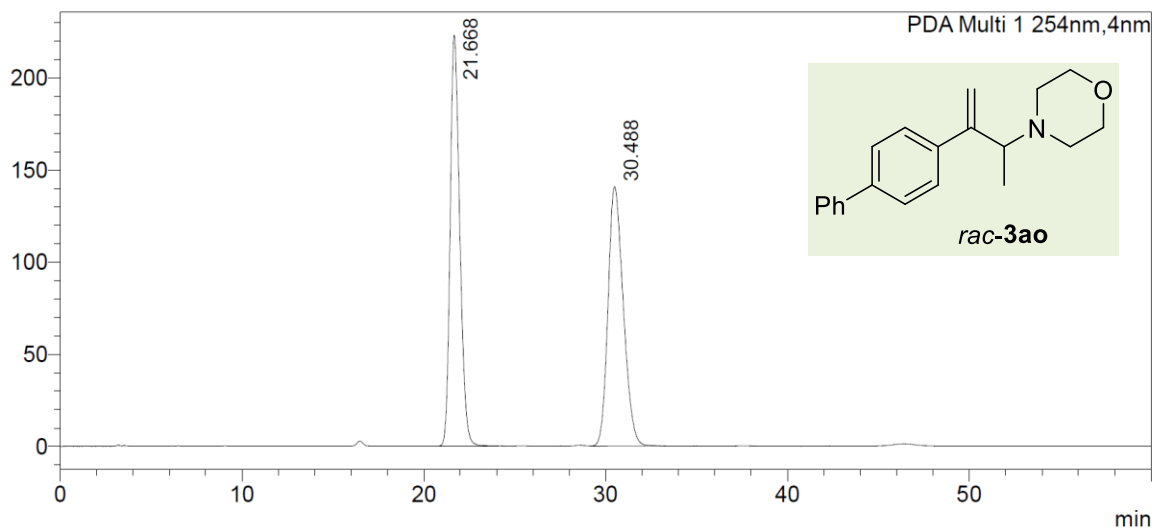

### <Peak Table>

PDA Ch1 254nm

| Peak# | Ret. Time | Area%   |
|-------|-----------|---------|
| 1     | 21.668    | 49.916  |
| 2     | 30.488    | 50.084  |
| Total |           | 100.000 |

### <Chromatogram>

mAU

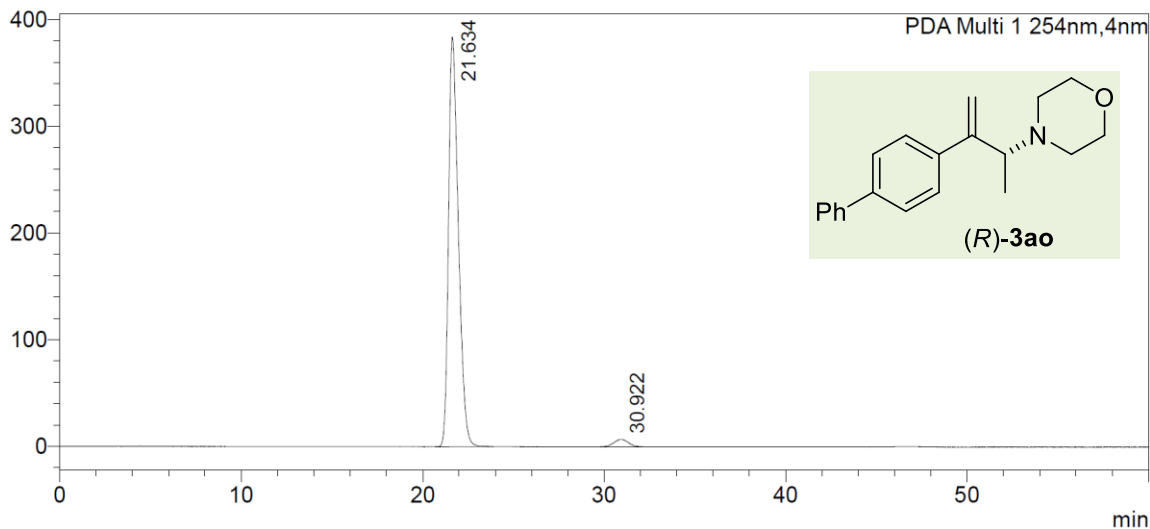

### <Peak Table>

PDA Ch1 254nm

| Peak# | Ret. Time | Area%   |
|-------|-----------|---------|
| 1     | 21.634    | 97.329  |
| 2     | 30.922    | 2.671   |
| Total |           | 100.000 |

**(R)-3-([1,1'-Biphenyl]-4-yl)-N-allylbut-3-en-2-amine 3ap**

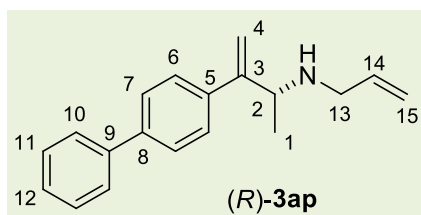

Synthesized at room temperature for 24 h following the general procedure using 4-(buta-1,3-dien-2-yl)-1,1'-biphenyl **1a** (51.6 mg, 0.25 mmol, 1.0 equiv), allylamine **2p** (75  $\mu$ L, 1.00 mmol, 4.0 equiv), Ni(cod)<sub>2</sub> (3.4 mg, 0.0125 mmol, 5 mol%), (*R,R*)-BenzP\* (4.2 mg, 0.015 mmol, 6

mol%), 2,2,2-trifluoroethanol (19  $\mu$ L, 0.25 mmol, 1.0 equiv) and mesitylene (0.50 mL, 0.5 M). Consumption of **1a**: 99%, conversion of **3ap**: 71%, *r.r.* = 8:1. Purification by flash chromatography over silica gel (Pentane:EtOAc = 1:1) led to the desired product as a colorless viscous oil (46.1 mg, 70% yield, 94% *ee*).

**<sup>1</sup>H NMR** (400 MHz, CDCl<sub>3</sub>)  $\delta$  (ppm) = 7.65 – 7.55 (m, 4H, *H*-7+*H*-10), 7.51 – 7.41 (m, 4H, *H*-6+*H*-11), 7.39 – 7.31 (m, 1H, *H*-12), 6.03 – 5.88 (m, 1H, *H*-14), 5.34 (d, <sup>2</sup>*J*<sub>HH</sub> = 1.1 Hz, 1H, *H*-4), 5.29 (s, 1H, *H*-4), 5.21 (dd, <sup>3</sup>*J*<sub>HH</sub> = 17.2, <sup>2</sup>*J*<sub>HH</sub> = 1.6 Hz, 1H, *H*-15), 5.11 (dd, <sup>3</sup>*J*<sub>HH</sub> = 10.4, <sup>2</sup>*J*<sub>HH</sub> = 1.2 Hz, 1H, *H*-15), 3.78 (q, <sup>3</sup>*J*<sub>HH</sub> = 6.5 Hz, 1H, *H*-2), 3.36 (dd, <sup>2</sup>*J*<sub>HH</sub> = 14.0, <sup>3</sup>*J*<sub>HH</sub> = 5.8 Hz, 1H, *H*-13), 3.28 (dd, <sup>2</sup>*J*<sub>HH</sub> = 14.0, <sup>3</sup>*J*<sub>HH</sub> = 6.2 Hz, 1H, *H*-13), 1.36 (s, 1H, *NH*), 1.25 (d, <sup>3</sup>*J*<sub>HH</sub> = 6.6 Hz, 3H, *H*-1).

**<sup>13</sup>C{<sup>1</sup>H} NMR** (100 MHz, CDCl<sub>3</sub>)  $\delta$  (ppm) = 151.7 (C-3), 140.9 (C-9), 140.3 (C-5+C-8), 137.3 (CH-14), 128.9 (CH-11), 127.5 (CH-6), 127.4 (CH-12), 127.13 (CH-10), 127.07 (CH-7), 115.9 (CH<sub>2</sub>-15), 112.7 (CH<sub>2</sub>-4), 56.7 (CH-2), 50.1 (CH<sub>2</sub>-13), 21.8 (CH<sub>3</sub>-1).

**HRMS** (ESI<sup>+</sup>): calculated [M+H]<sup>+</sup> for C<sub>19</sub>H<sub>22</sub>N<sup>+</sup>: 264.1747; found: 264.1752.

**IR** (neat)  $\nu$  (cm<sup>-1</sup>): 3077, 3030, 2970, 2925, 2868, 1642, 1601, 1486, 1447, 1370, 1120, 1078, 1006, 995, 910, 843, 769, 739, 695.

**HPLC**: 94% *ee*, chiral stationary column: OJ-H, mobile phase: hexane/*i*PrOH = 97/3, 1.0 mL/min, 254 nm, 30 °C, *t*<sub>R</sub> (minor) = 8.7 min, *t*<sub>R</sub> (major) = 10.7 min.

**[ $\alpha$ ]<sup>20</sup><sub>D</sub>** = -12.6 (c 1.0, CHCl<sub>3</sub>).



### <Chromatogram>

mAU

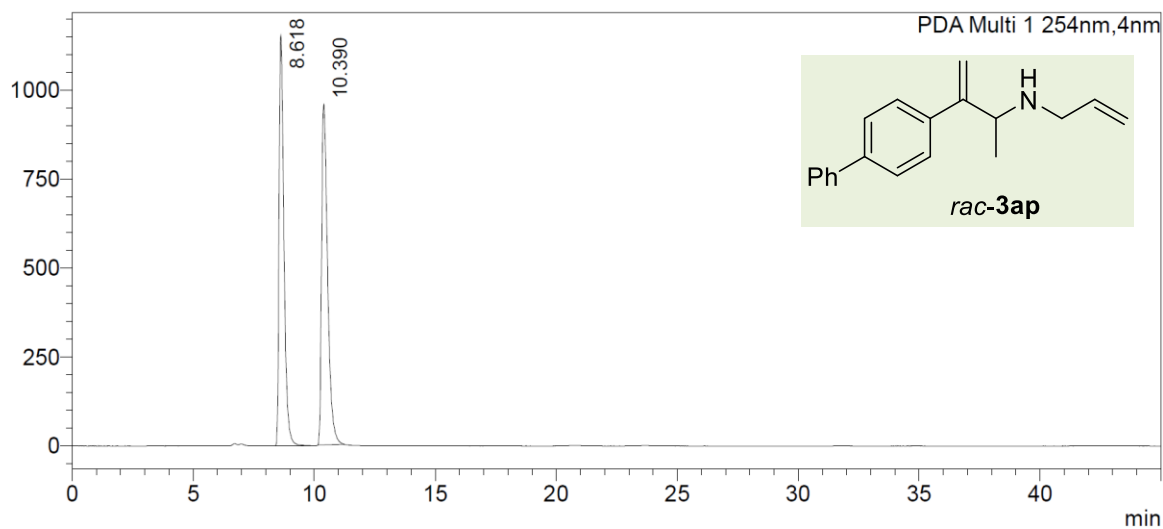

### <Peak Table>

PDA Ch1 254nm

| Peak# | Ret. Time | Area%   |
|-------|-----------|---------|
| 1     | 8.618     | 49.708  |
| 2     | 10.390    | 50.292  |
| Total |           | 100.000 |

### <Chromatogram>

mAU

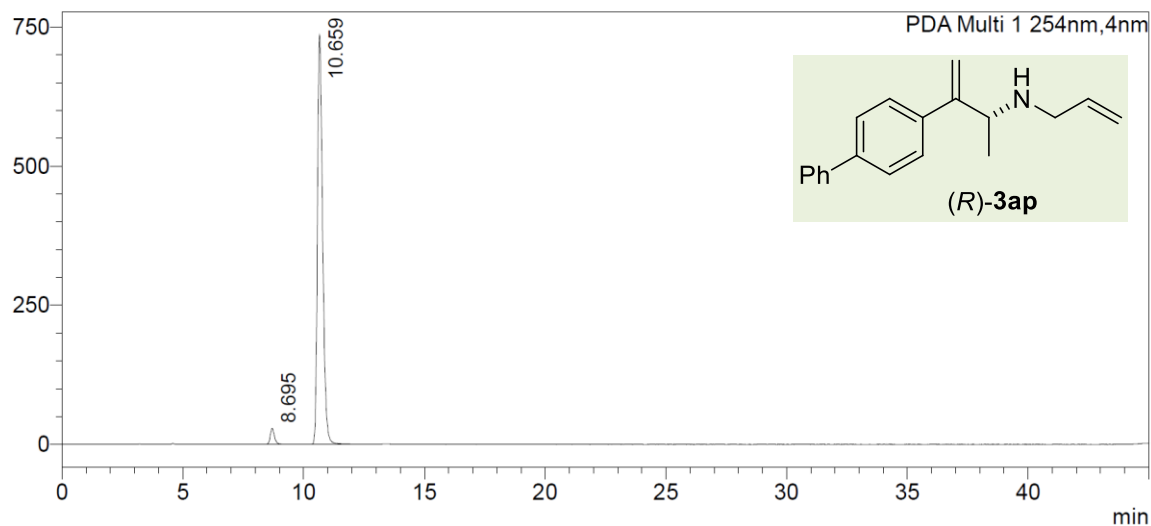

### <Peak Table>

PDA Ch1 254nm

| Peak# | Ret. Time | Area%   |
|-------|-----------|---------|
| 1     | 8.695     | 3.033   |
| 2     | 10.659    | 96.967  |
| Total |           | 100.000 |

## 5. Rh-catalyzed deallylation of **3ap**

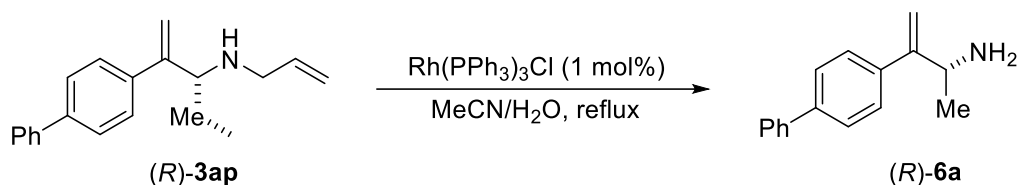

Modification of a reported method,<sup>2</sup> Rh(PPh<sub>3</sub>)<sub>3</sub>Cl (1.8 mg, 0.002 mmol, 1% mol) was added to a solution of (*R*)-**3ap** (52.7 mg, 0.20 mmol, 94% ee, 1.0 equiv) in MeCN/H<sub>2</sub>O (degassed solvent, 2.0 mL, V/V = 85/15) under nitrogen atmosphere, and the mixture was heated at reflux (90 °C) for 7 h. The reaction mixture was cooled to room temperature, filtered over a short pad of silica gel (EtOAc and CH<sub>2</sub>Cl<sub>2</sub> washing, with 5% MeOH) and concentrated *in vacuo* to afford the crude mixture. Consumption of **3ap**: 97%, conversion of **6a**: 81%. Then the residue was purified by silica gel column chromatography (CH<sub>2</sub>Cl<sub>2</sub>:MeOH = 10:1) afforded **6a** (36.3 mg, 81% yield, 94% ee) as a light yellow solid.

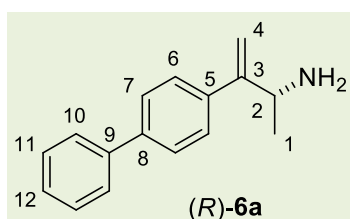

**<sup>1</sup>H NMR** (400 MHz, Methanol-*d*<sub>4</sub>)  $\delta$  (ppm) = 7.64 – 7.58 (m, 4H, *H*-7+*H*-10), 7.48 – 7.40 (m, 4H, *H*-6+*H*-11), 7.35 – 7.30 (m, 1H, *H*-12), 5.34 (s, 1H, *H*-4), 5.31 (s, 1H, *H*-4), 4.13 (q, *J* = 6.7 Hz, 1H, *H*-2), 1.27 (d, *J* = 6.6 Hz, 3H, *H*-1).

**<sup>13</sup>C{<sup>1</sup>H} NMR** (100 MHz, Methanol-*d*<sub>4</sub>)  $\delta$  (ppm) = 151.8 (C-3), 141.9 (C-8), 141.8 (C-9), 140.8 (C-5), 129.9 (CH-11), 128.5 (CH-12), 128.2 (CH-6), 128.1 (CH-7), 127.9 (CH-10), 111.6 (CH<sub>2</sub>-4), 50.6 (CH-2), 22.3 (CH<sub>3</sub>-1).

**m.p.** = 206.0 – 208.5 °C.

**HRMS** (ESI<sup>+</sup>): calculated [M+H]<sup>+</sup> for C<sub>16</sub>H<sub>18</sub>NO<sup>+</sup>: 224.1434; found: 224.1442.

**IR** (neat)  $\nu$  (cm<sup>-1</sup>): 3034, 2975, 2867, 2806, 2709, 2644, 2497, 1620, 1540, 1513, 1487, 1449, 1377, 1261, 1207, 1145, 1116, 1077, 1004, 909, 840, 769, 737, 694.

**HPLC**: 94% ee, chiral stationary column: AD-H, mobile phase: hexane/*i*PrOH = 95/5, 1.0 mL/min, 254 nm, 30 °C, *t*<sub>R</sub> (minor) = 9.9 min, *t*<sub>R</sub> (major) = 11.6 min.

**[ $\alpha$ ]<sup>20</sup><sub>D</sub>** = -60.6 (c 0.05, MeOH).

### <Chromatogram>

mAU

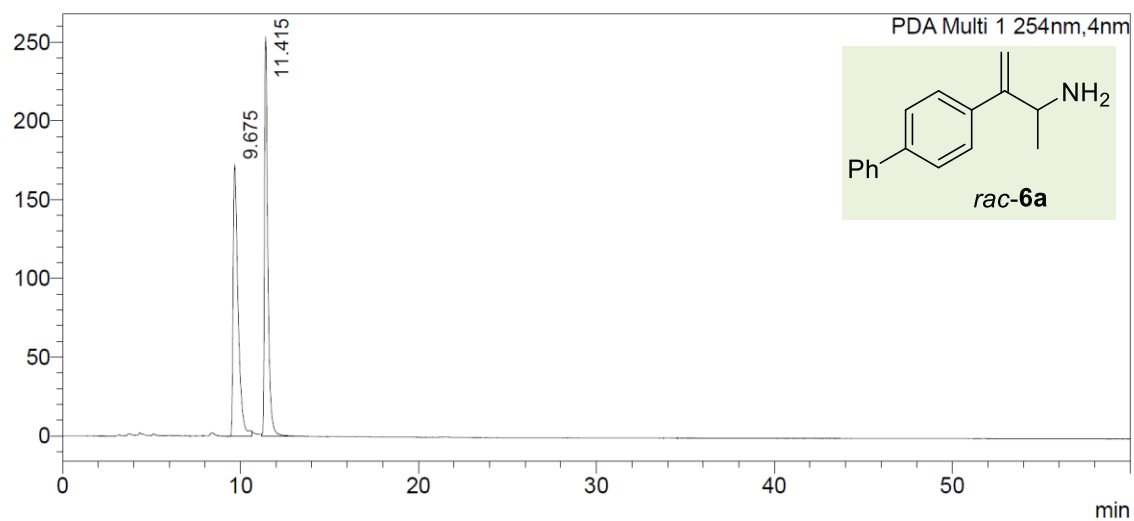

### <Peak Table>

PDA Ch1 254nm

| Peak# | Ret. Time | Area%   |
|-------|-----------|---------|
| 1     | 9.675     | 50.048  |
| 2     | 11.415    | 49.952  |
| Total |           | 100.000 |

### <Chromatogram>

mAU

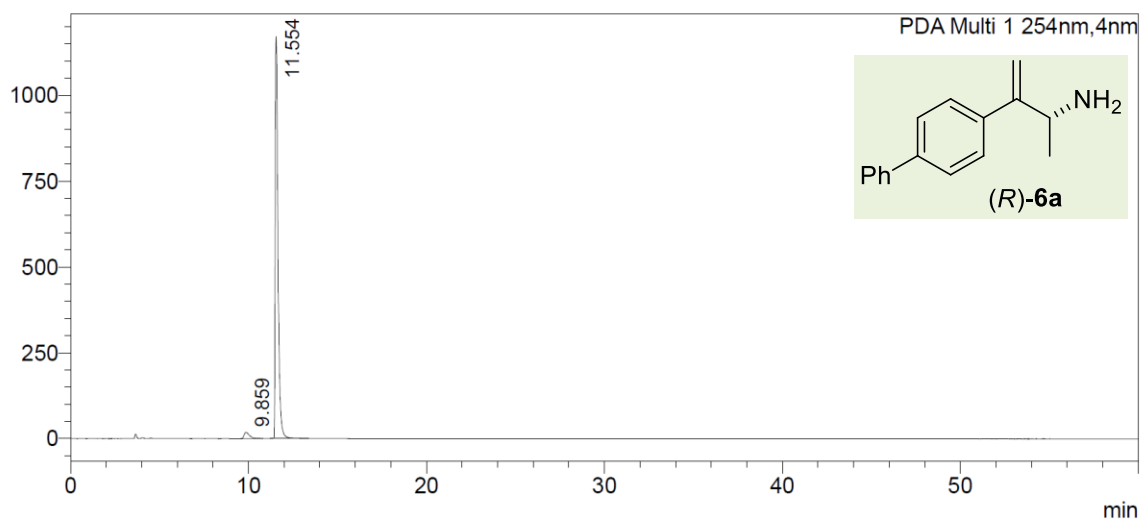

### <Peak Table>

PDA Ch1 254nm

| Peak# | Ret. Time | Area%   |
|-------|-----------|---------|
| 1     | 9.859     | 3.052   |
| 2     | 11.554    | 96.948  |
| Total |           | 100.000 |

## 6. Improved sets of reaction conditions

### 6.1. Reduced Catalyst Loading

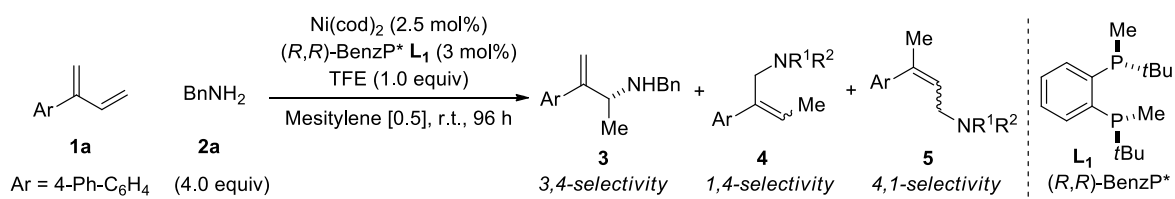

Performed at room temperature for 96 h following the general procedure using 4-(buta-1,3-dien-2-yl)-1,1'-biphenyl **1a** (103 mg, 0.50 mmol, 1.0 equiv), benzylamine **2a** (219  $\mu$ L, 2.0 mmol, 4.0 equiv), Ni(cod)<sub>2</sub> (3.4 mg, 0.0125 mmol, 2.5 mol%), (*R,R*)-BenzP\* (4.2 mg, 0.015 mmol, 3.0 mol%), 2,2,2-trifluoroethanol (38  $\mu$ L, 0.50 mmol, 1.0 equiv) and mesitylene (1.0 mL, 0.50 M). Consumption of **1a**: >99%, conversion of **3aa**: 84%, *r.r.* = 6:1. Purification by flash chromatography over silica gel (pentane:EtOAc = 5:1) led to the desired product as a yellow solid (120.8 mg, 77% yield, 92% ee).

### 6.2. Reduced Amine Loading

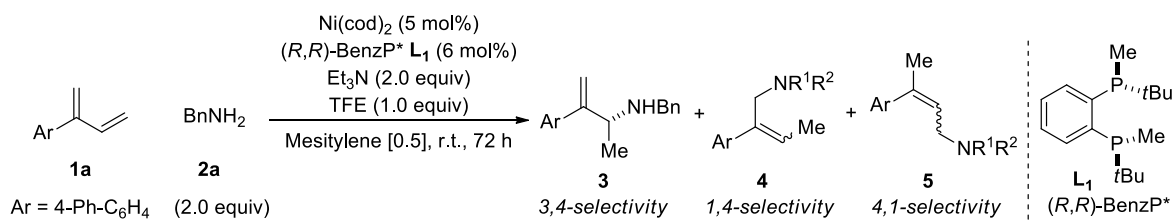

In a N<sub>2</sub>-filled glovebox, Ni(cod)<sub>2</sub> (3.4 mg, 0.0125 mmol, 5 mol%) and (*R,R*)-BenzP\* **L1** (4.2 mg, 0.015 mmol, 6 mol%) were charged in a 5 mL Schlenk tube and dissolved in anhydrous mesitylene (0.50 mL, 0.50 M). After stirring at room temperature for 10 min, the diene **1a** (51.6 mg, 0.25 mmol, 1.0 equiv), BnNH<sub>2</sub> **2a** (55  $\mu$ L, 0.50 mmol, 4.0 equiv), Et<sub>3</sub>N (28  $\mu$ L, 0.50 mmol, 4.0 equiv) and TFE (19  $\mu$ L, 0.25 mmol, 1.0 equiv) were added sequentially. The tube was sealed, taken out of the glovebox and the reaction mixture was stirred at room temperature for 72 h. The reaction mixture was filtered over a short pad of silica gel, washed with ethyl acetate (10 mL) and concentrated under vacuum to afford the crude mixture. The conversion and isomeric ratio were determined by <sup>1</sup>H NMR analysis of the crude reaction mixture using CH<sub>2</sub>Br<sub>2</sub> as an internal standard. Consumption of **1a**: 85%, conversion of **3ap**: 75%, *r.r.* = 8:1. Purification by flash chromatography over silica gel (Pentane:EtOAc = 5:1) led to the desired product as a colorless oil (56.0 mg, 72% yield, 92% ee).

## 7. Supporting Organometallics

### 7.1. NMR Monitoring

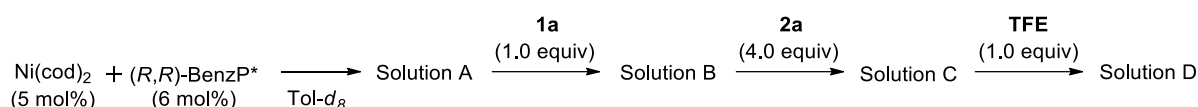

In a N<sub>2</sub>-filled glovebox, a stock solution of Ni(cod)<sub>2</sub> (6.9 mg, 0.025 mmol) and (R,R)BenzP\* (8.5 mg, 0.030 mmol) in toluene-*d*<sub>8</sub> (1.0 mL) was stirred for 5 min, and 0.40 mL of the resulting pale orange solution was introduced in a J-Young NMR tube (solution A). <sup>1</sup>H and <sup>31</sup>P{<sup>1</sup>H} NMR of this solution were immediately recorded. In another J-Young tube was weighted 4-(buta-1,3-dien-2-yl)-1,1'-biphenyl **1a** (41.3 mg, 0.20 mmol, 1.0 equiv), to which was added 0.40 mL of the Ni(cod)<sub>2</sub>/(R,R)BenzP\* stock solution A, which resulted in an immediate change of color from pale orange to dark orange (solution B). <sup>1</sup>H and <sup>31</sup>P{<sup>1</sup>H} NMR of this solution were immediately recorded. The J-Young tube containing solution B was brought back into the glovebox, and neat BnNH<sub>2</sub> **2a** (86.0 mg, 0.80 mmol, 4.0 equiv) was added to the tube (solution C). <sup>1</sup>H and <sup>31</sup>P{<sup>1</sup>H} NMR of this solution were immediately recorded. The J-Young tube containing solution C was brought back into the glove-box, and neat 2,2,2-trifluoroethanol (20.0 mg, 0.20 mmol, 1.0 equiv) was added to the tube, which resulted in a slight change of color from dark orange to pale orange (solution D). <sup>1</sup>H, <sup>19</sup>F{<sup>1</sup>H} and <sup>31</sup>P{<sup>1</sup>H} NMR of this solution were immediately recorded, and the evolution of the reaction mixture was monitored over 56 h.

$$\text{Ni(cod)}_2 + (R,R)\text{BenzP}^*$$

$$^1\text{H NMR (400 MHz, Toluene-}d_8\text{)}$$
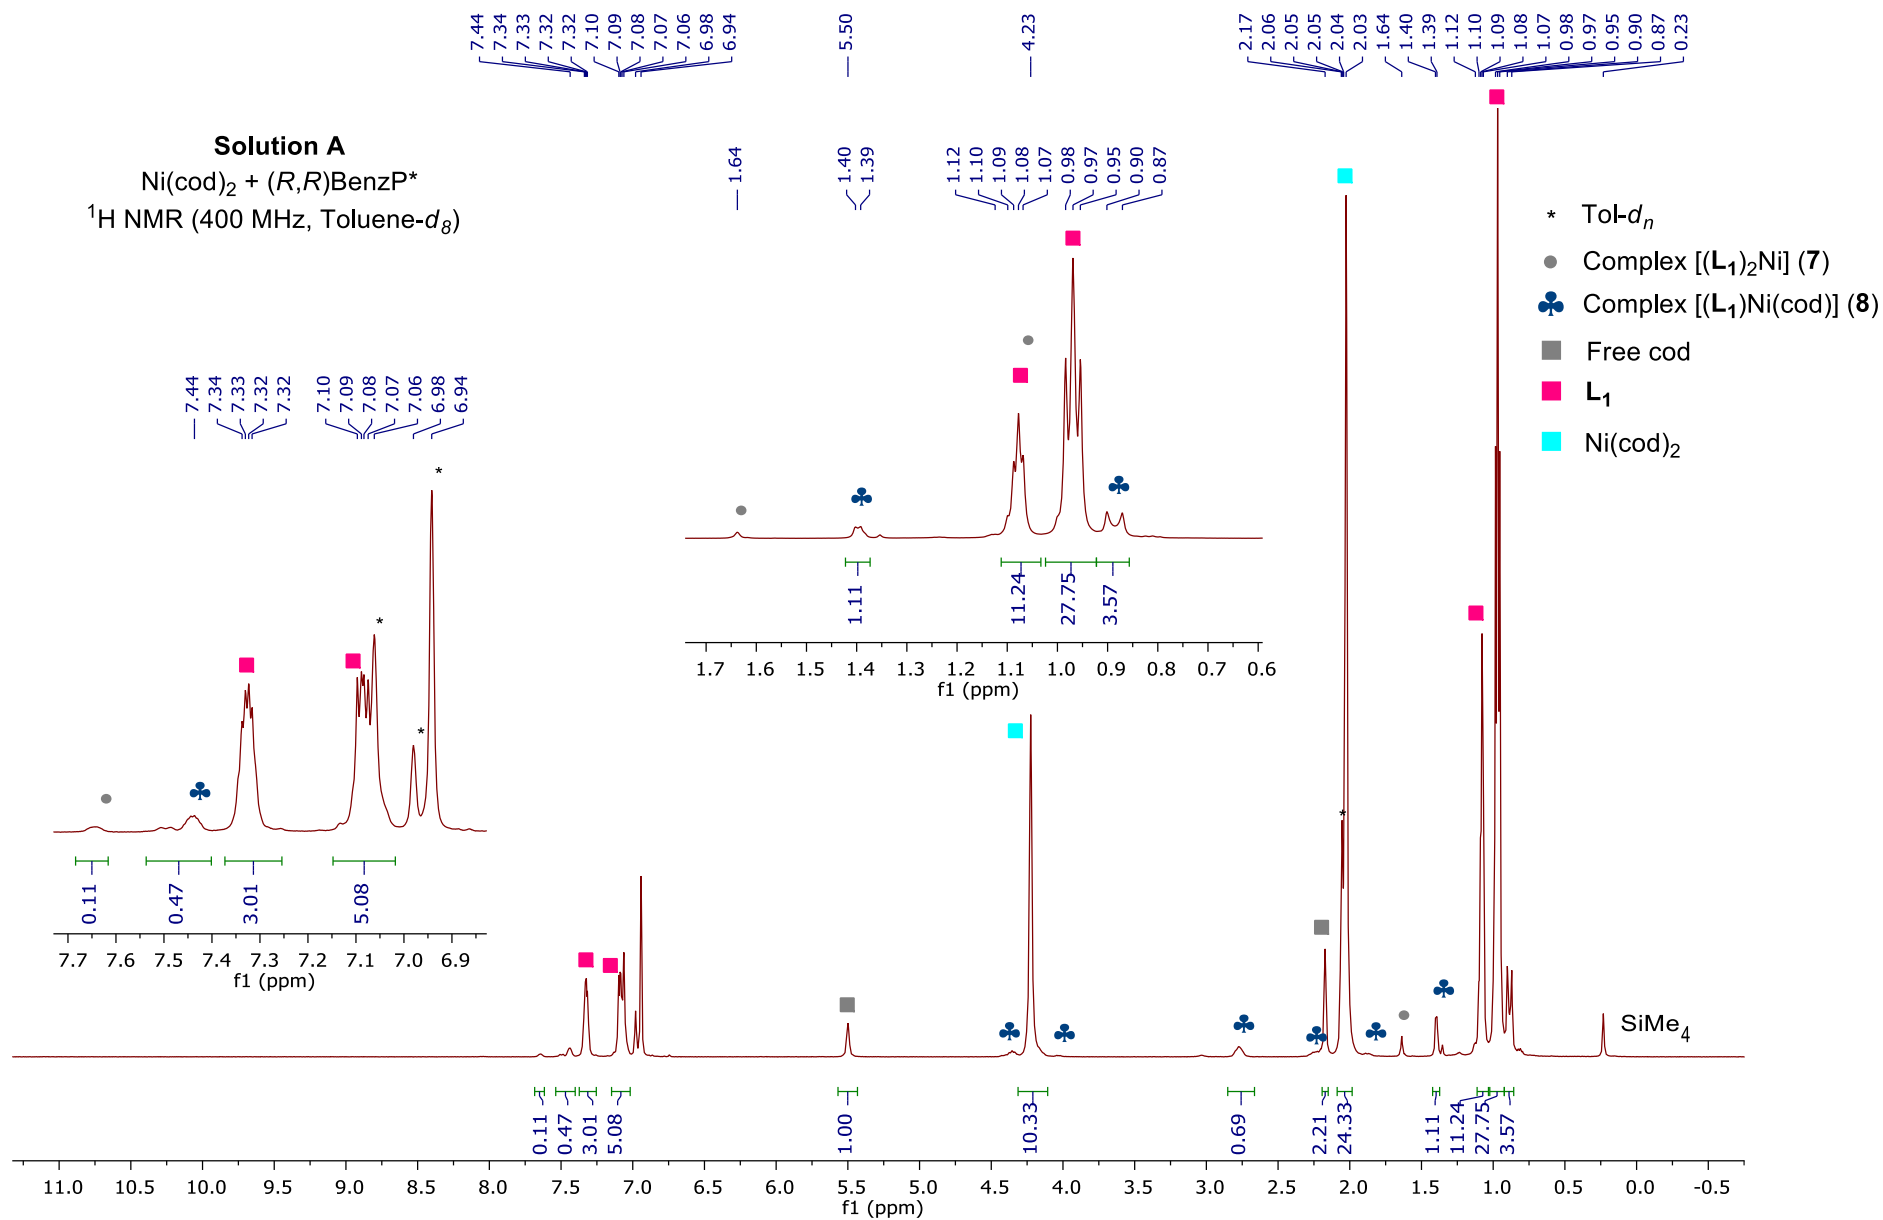

# **Solution A**

Ni(cod)<sub>2</sub> + (*R,R*)BenzP\*

<sup>31</sup>P{<sup>1</sup>H} NMR (160 MHz, Toluene-*d*<sub>8</sub>)

- Complex [(L<sub>1</sub>)<sub>2</sub>Ni] (7)
- ♣ Complex [(L<sub>1</sub>)Ni(cod)] (8)
- L<sub>1</sub>
- L<sub>1</sub> monophosphine oxide

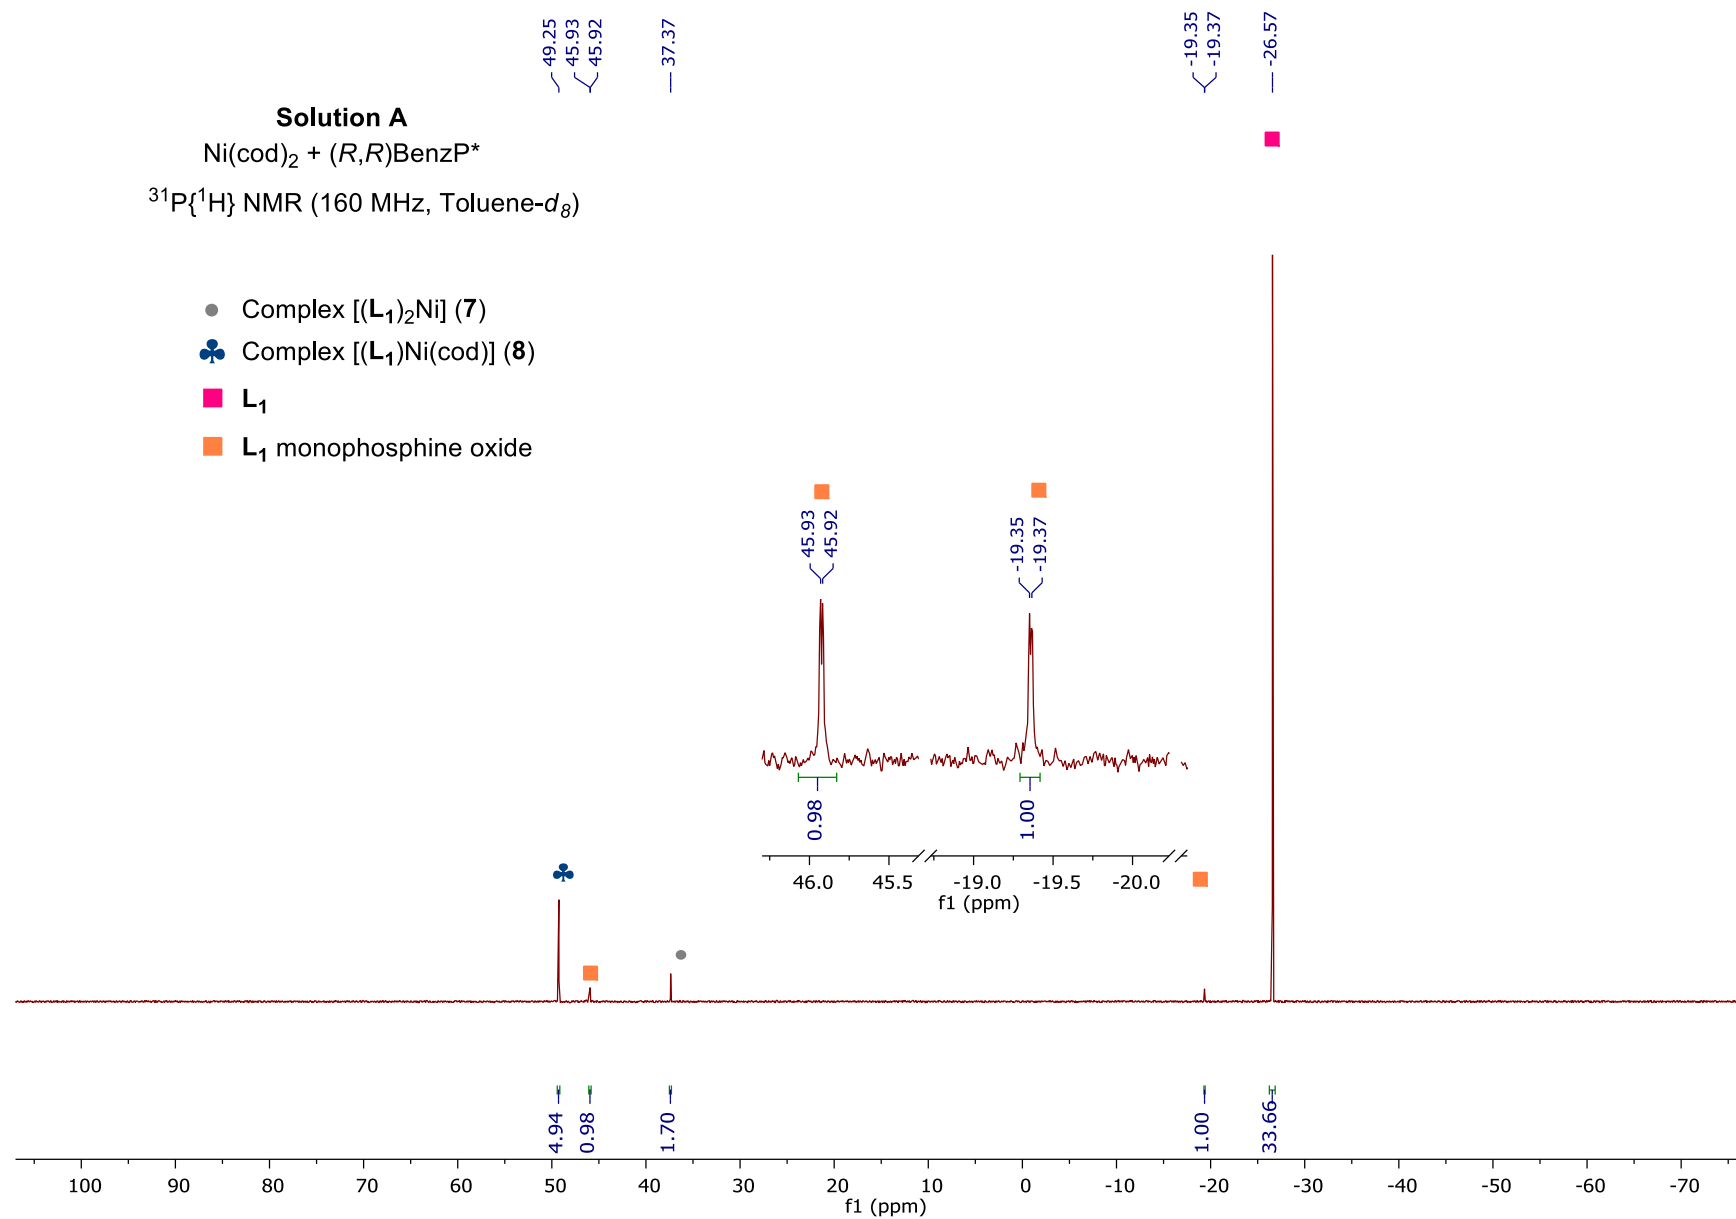

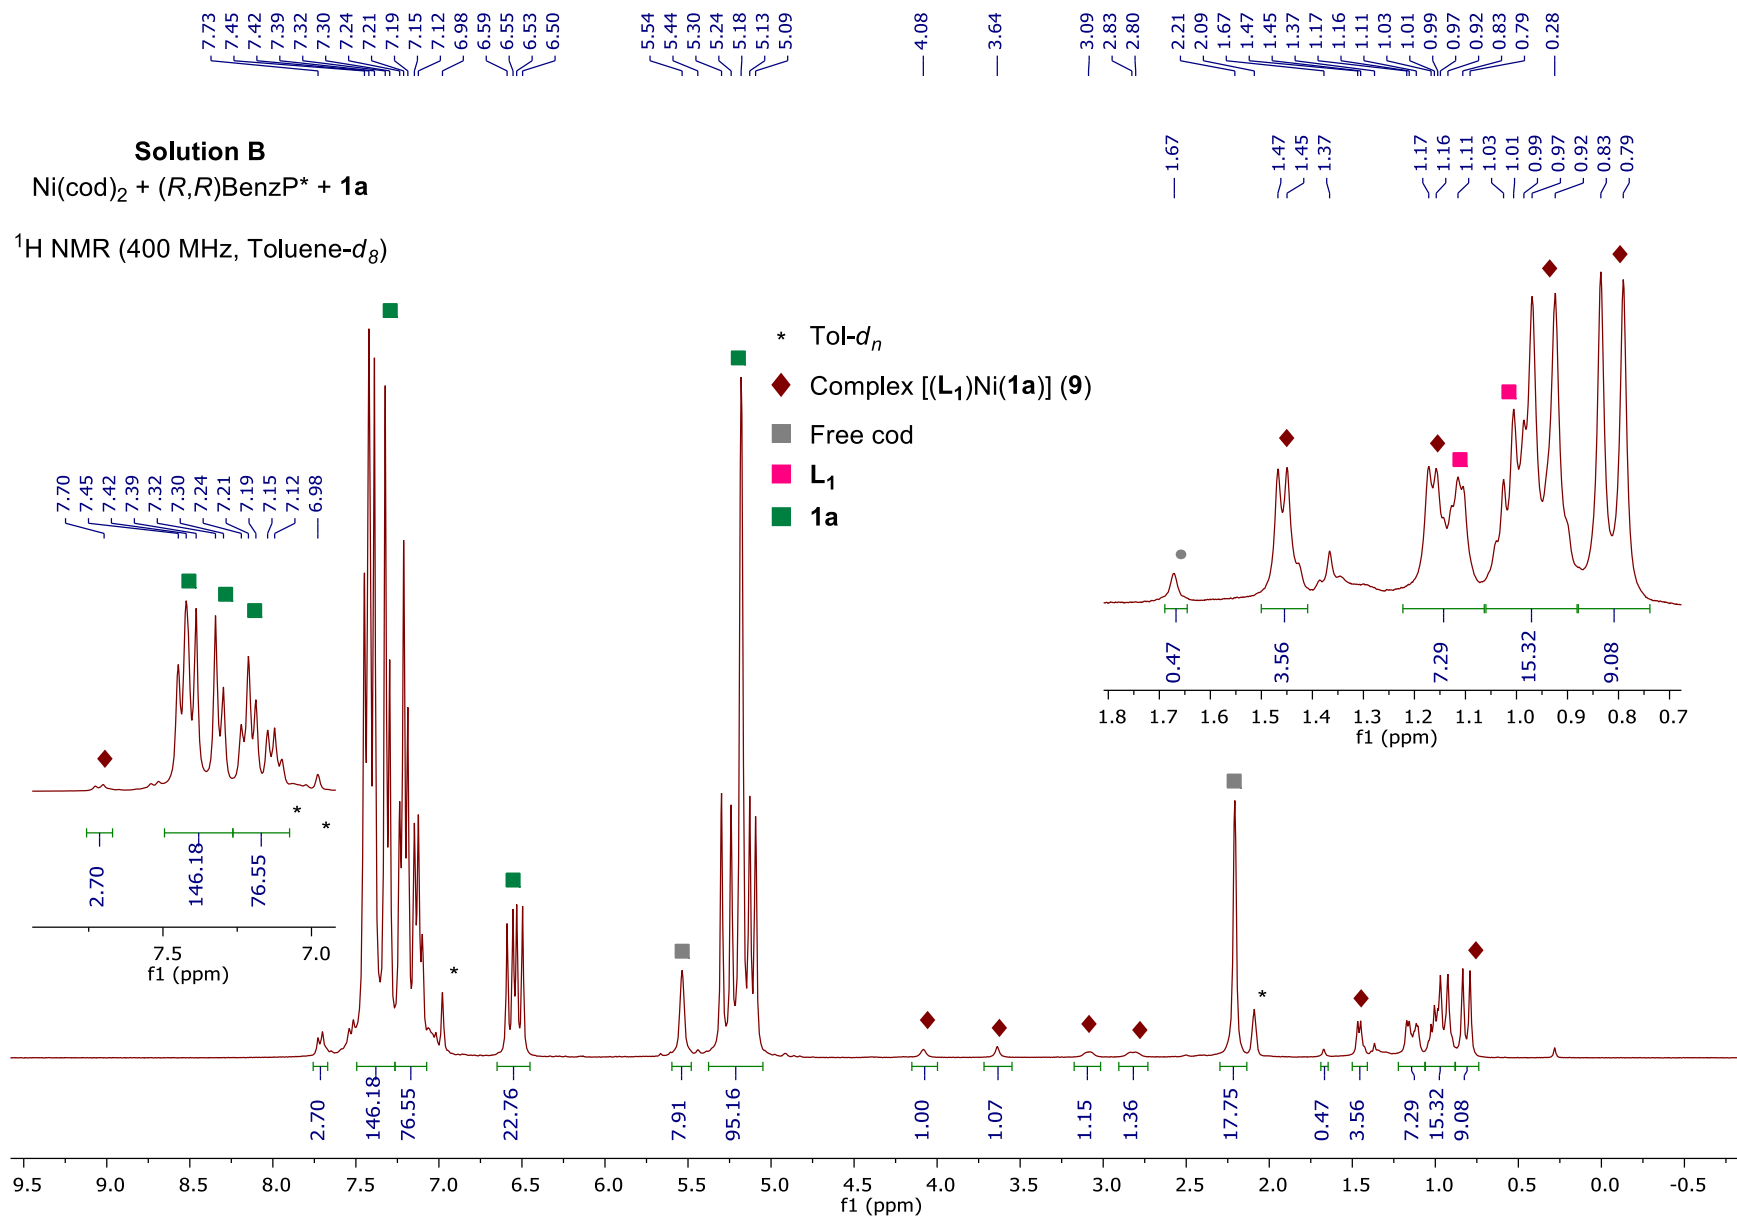



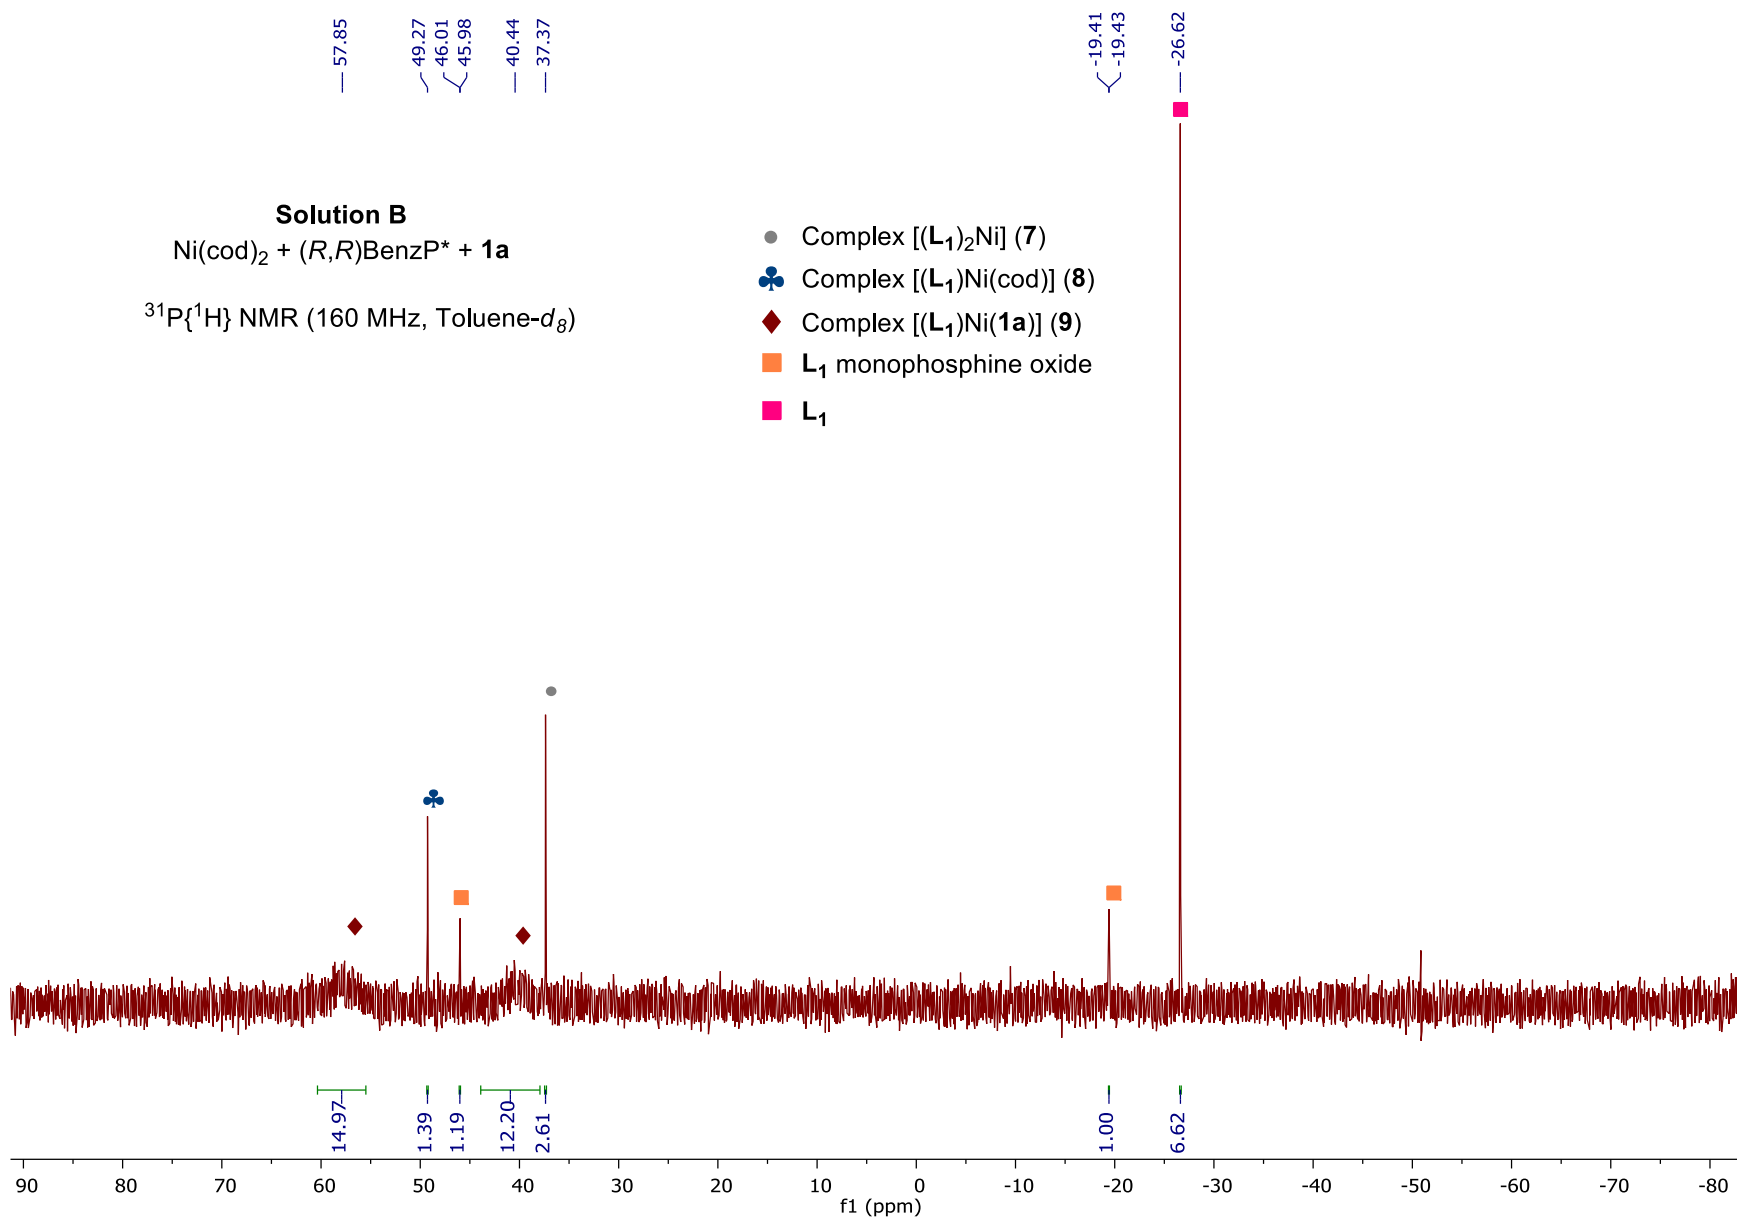

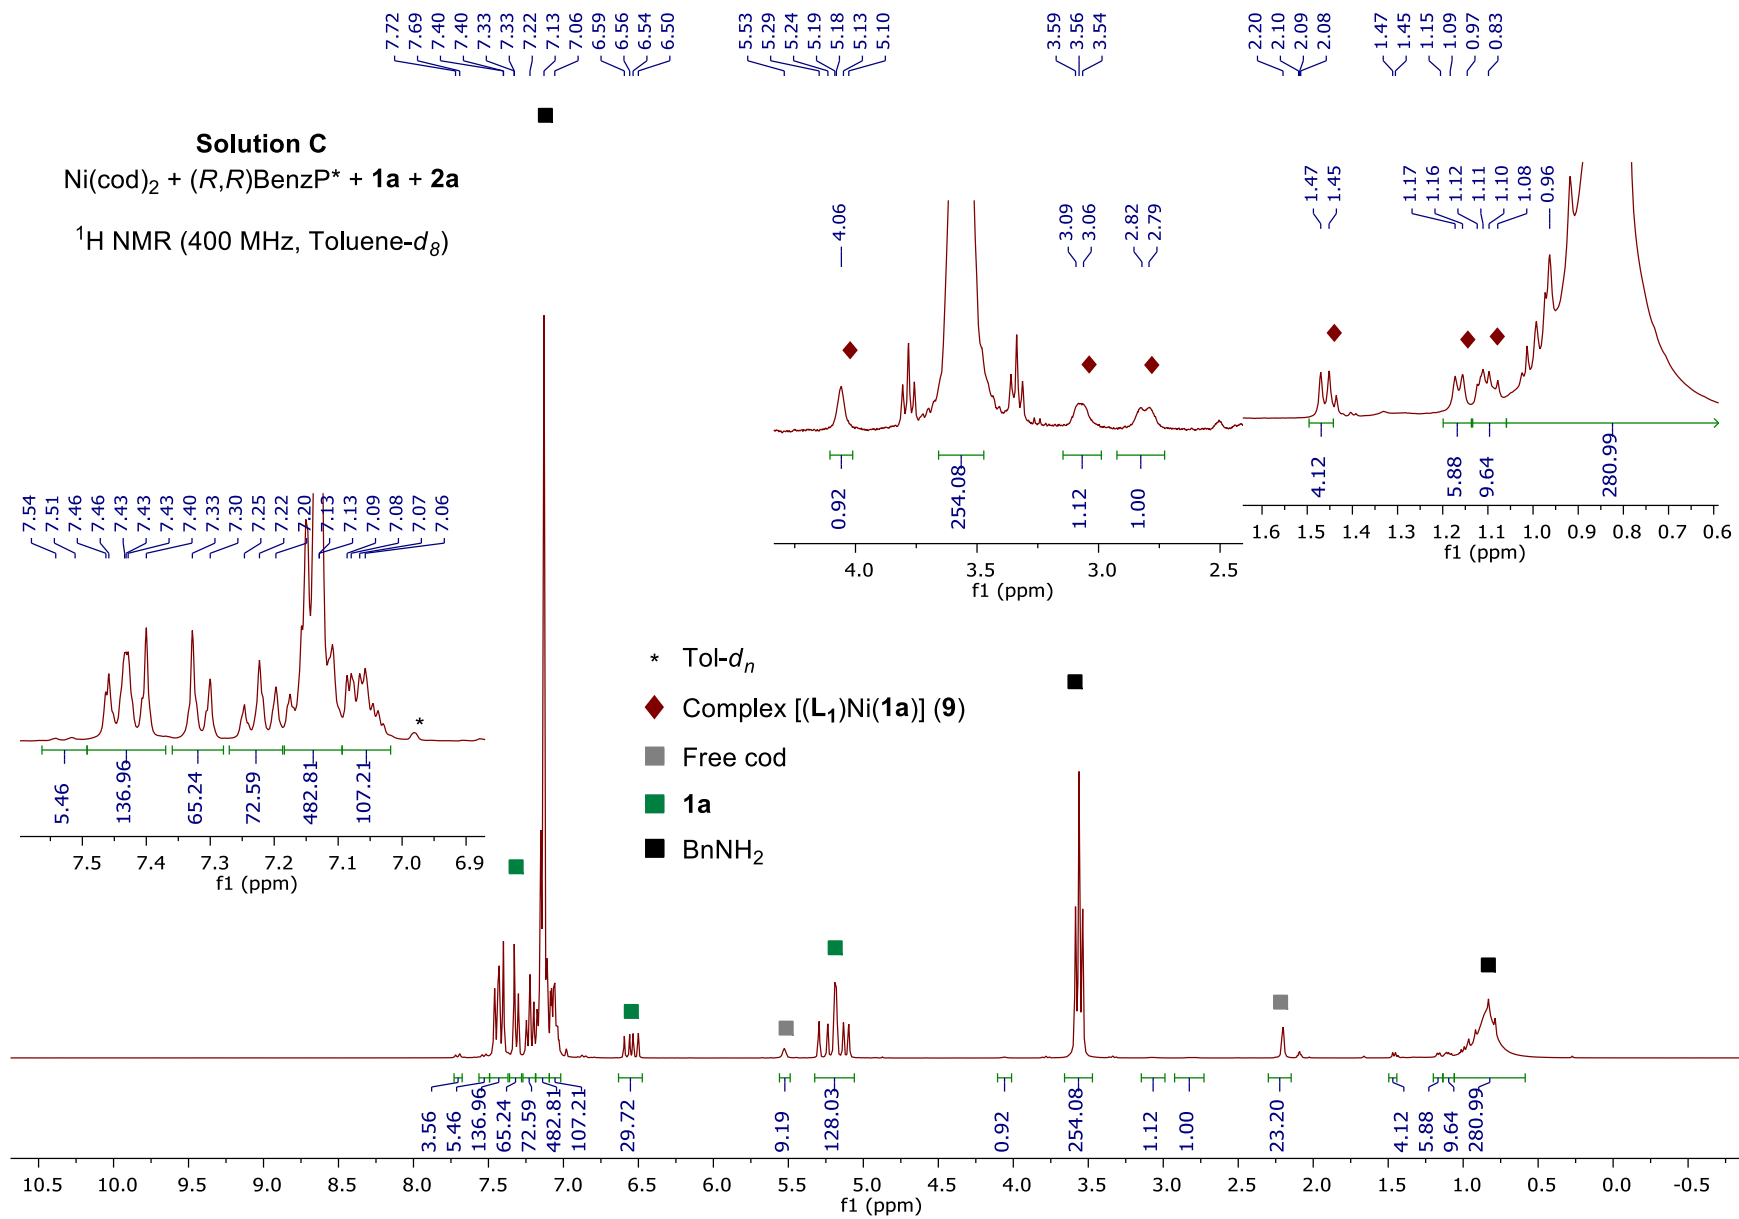

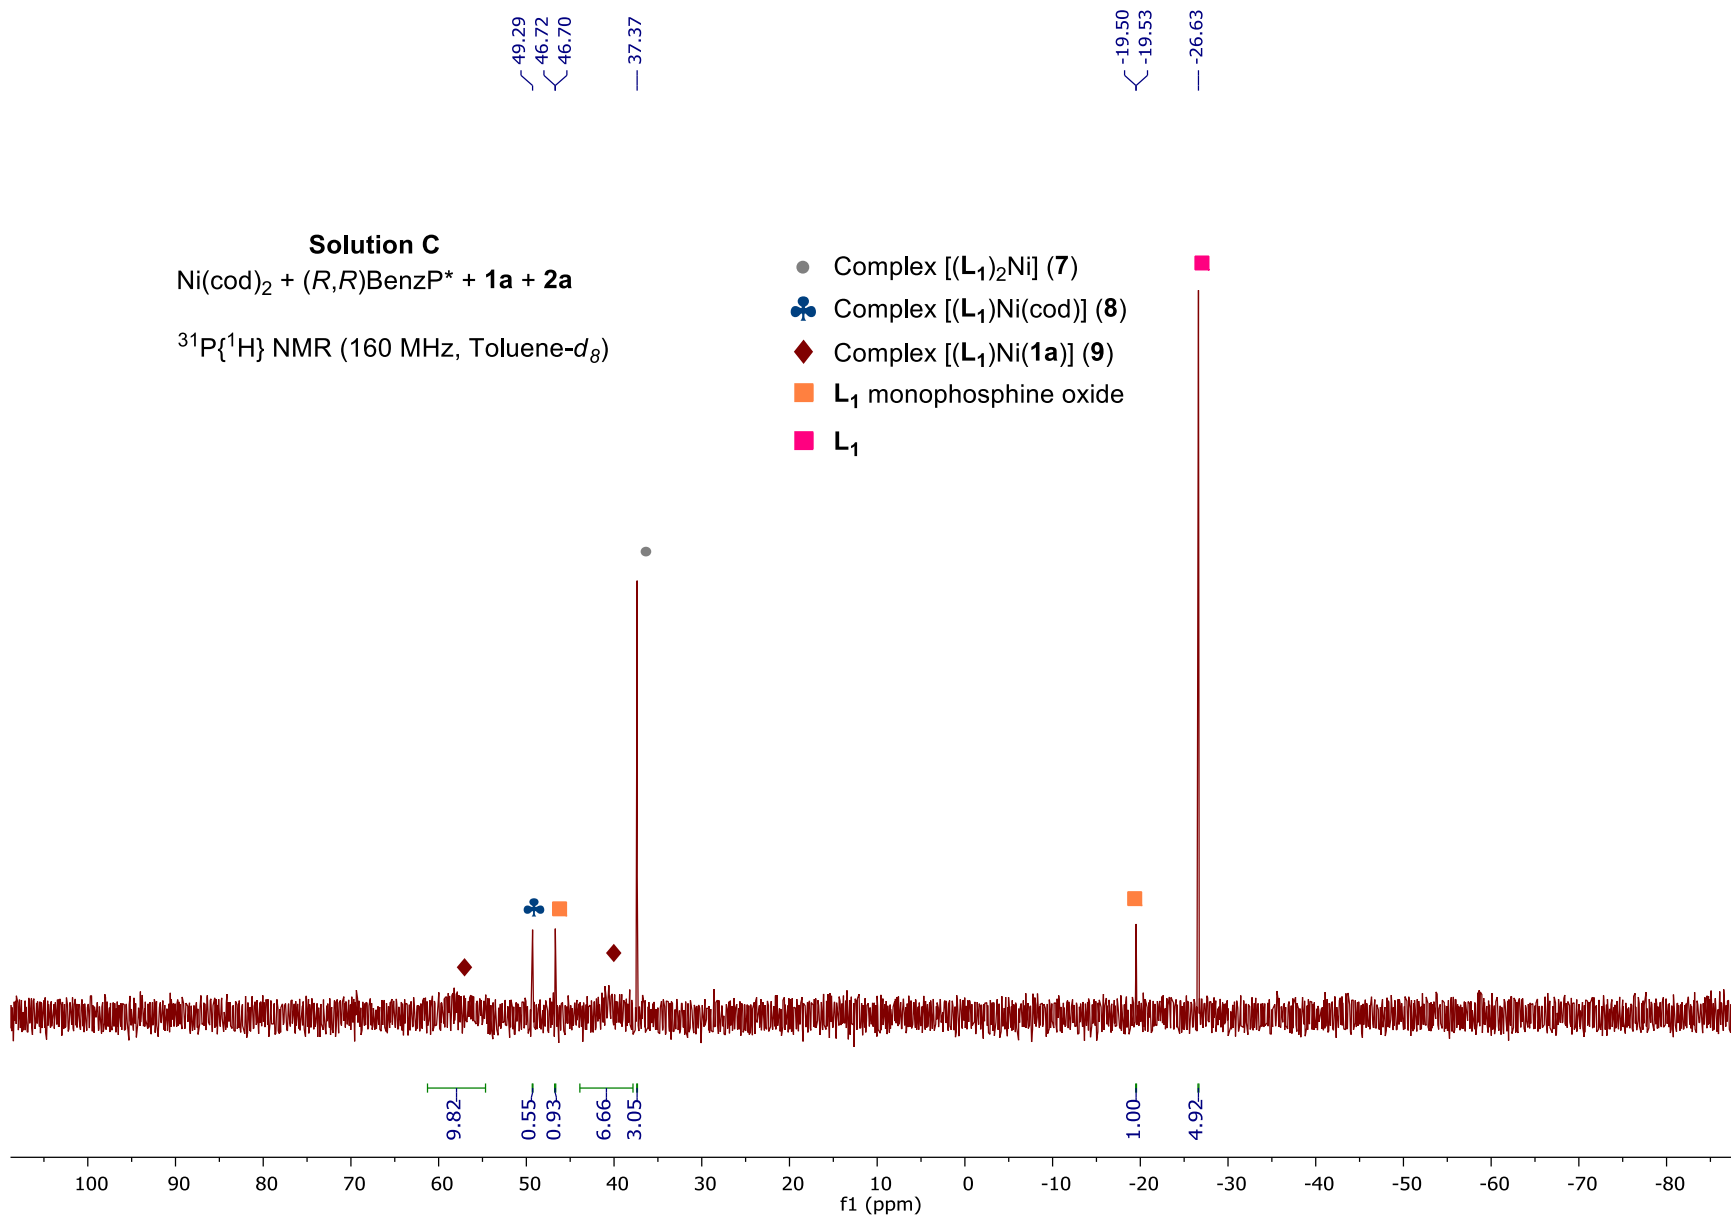

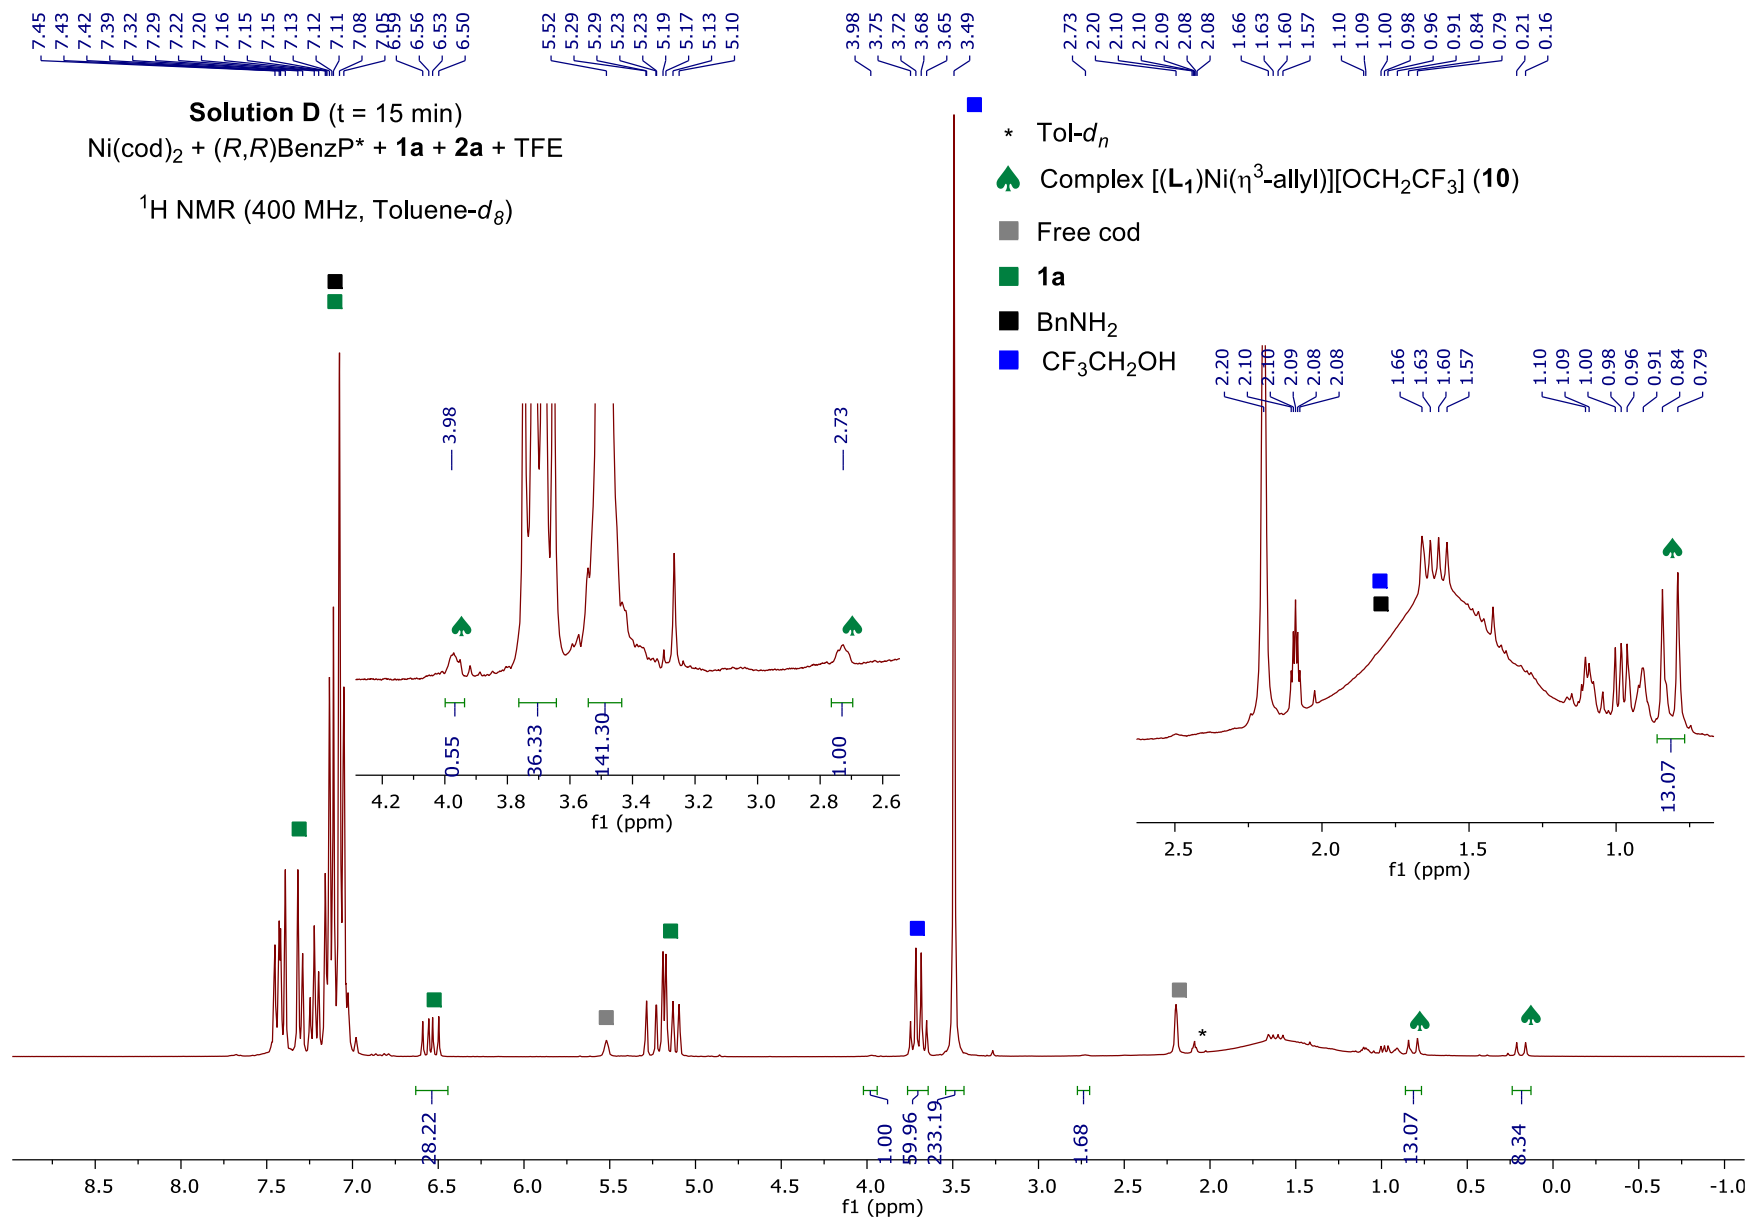

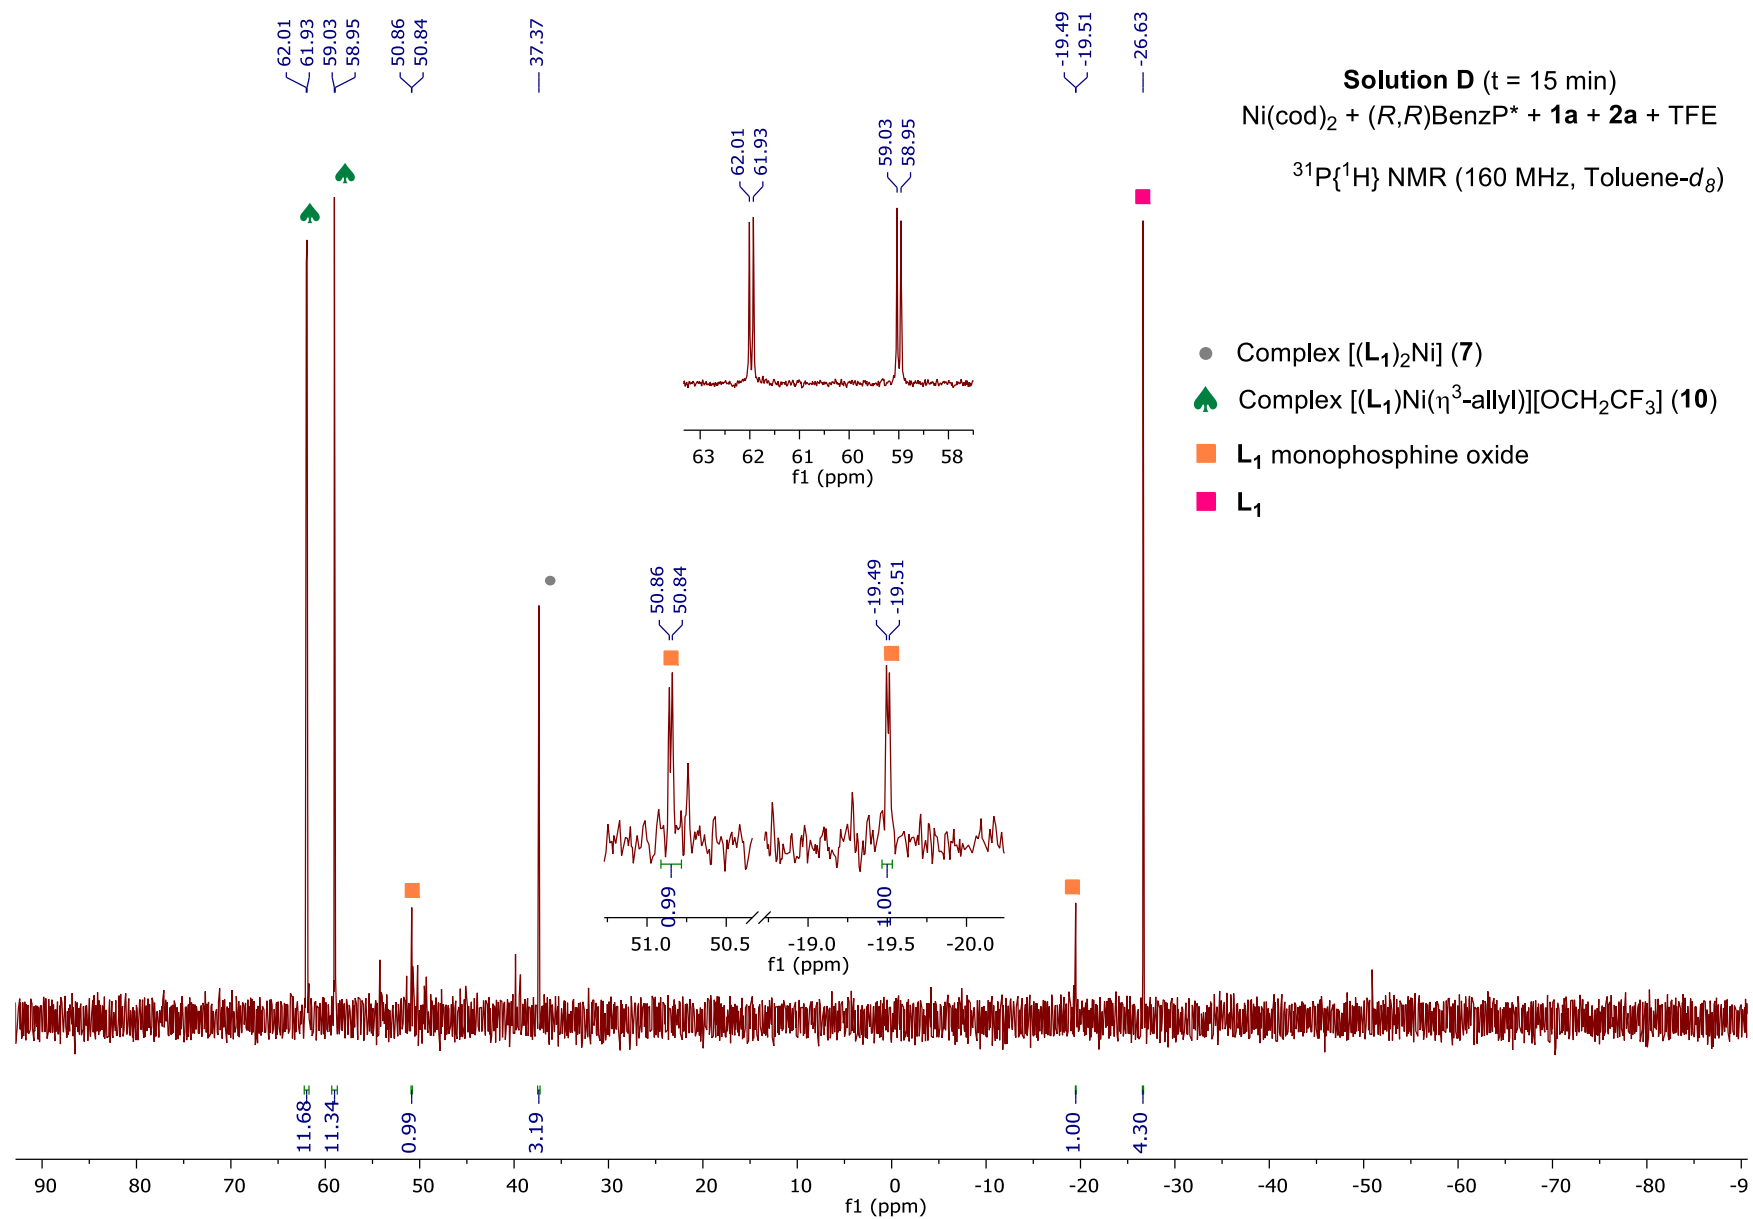

**Solution D** (t = 15 min)

Ni(cod)<sub>2</sub> + (*R,R*)BenzP\* + **1a** + **2a** + TFE

<sup>19</sup>F{<sup>1</sup>H} NMR (280 MHz, Toluene-*d*<sub>8</sub>)

♠ Complex [(**L**<sub>1</sub>)Ni(η<sup>3</sup>-allyl)][OCH<sub>2</sub>CF<sub>3</sub>] (**10**)

■ CF<sub>3</sub>CH<sub>2</sub>OH

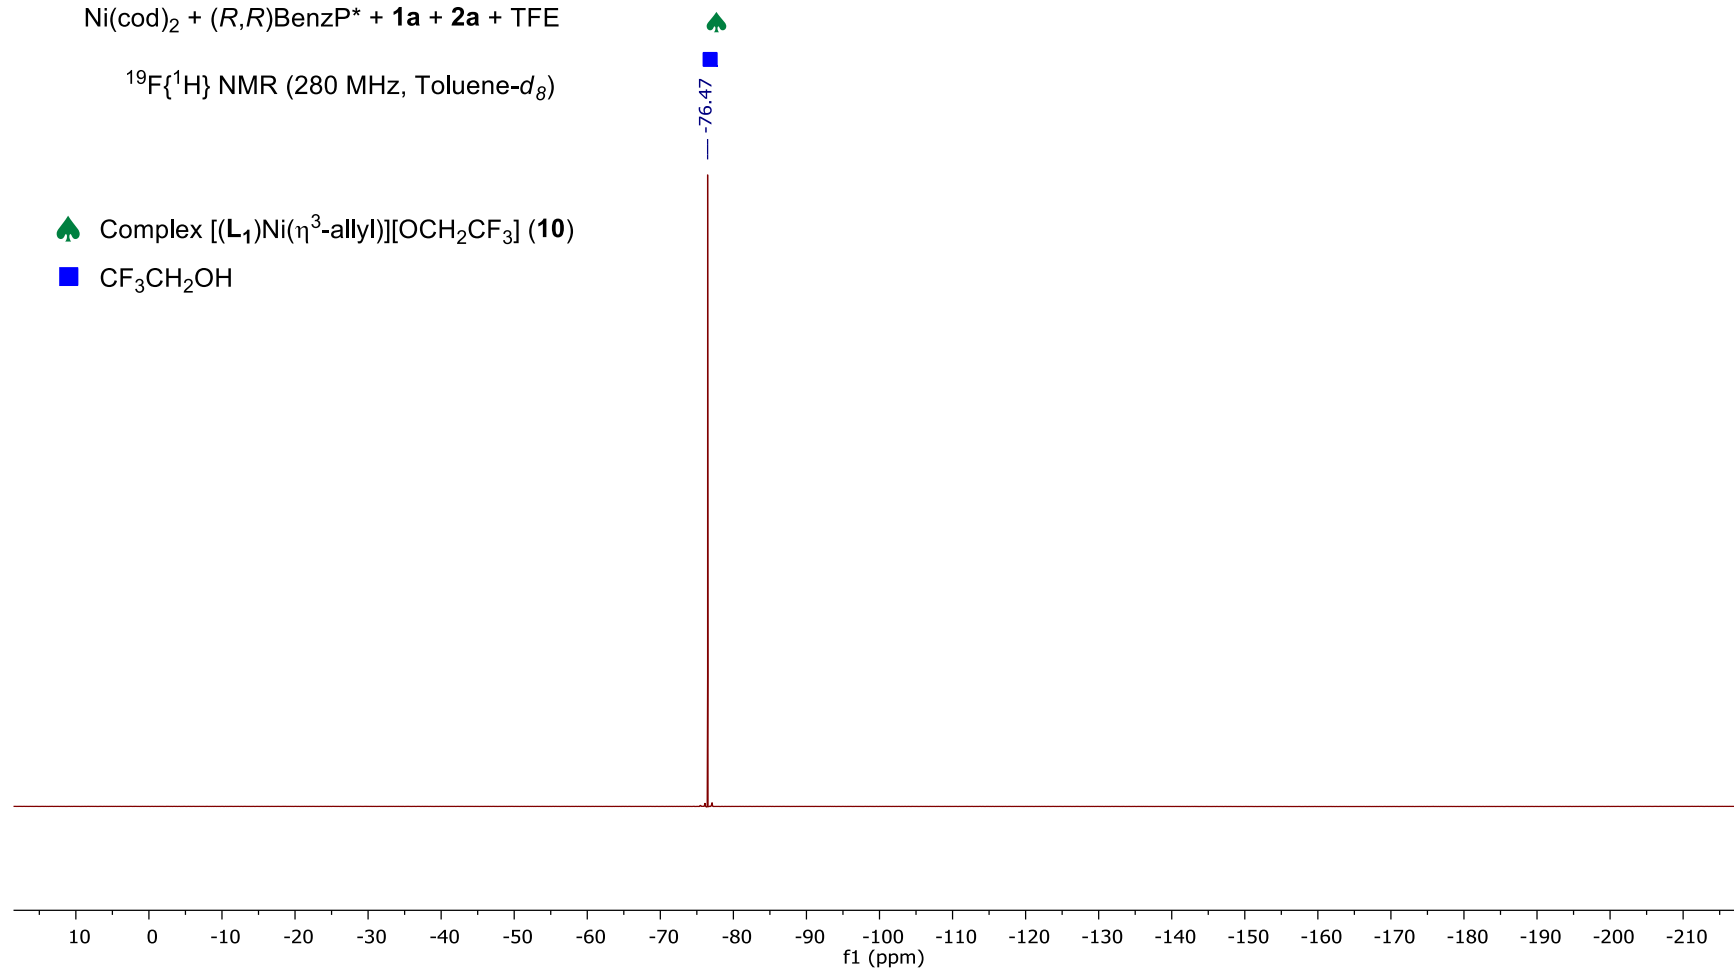

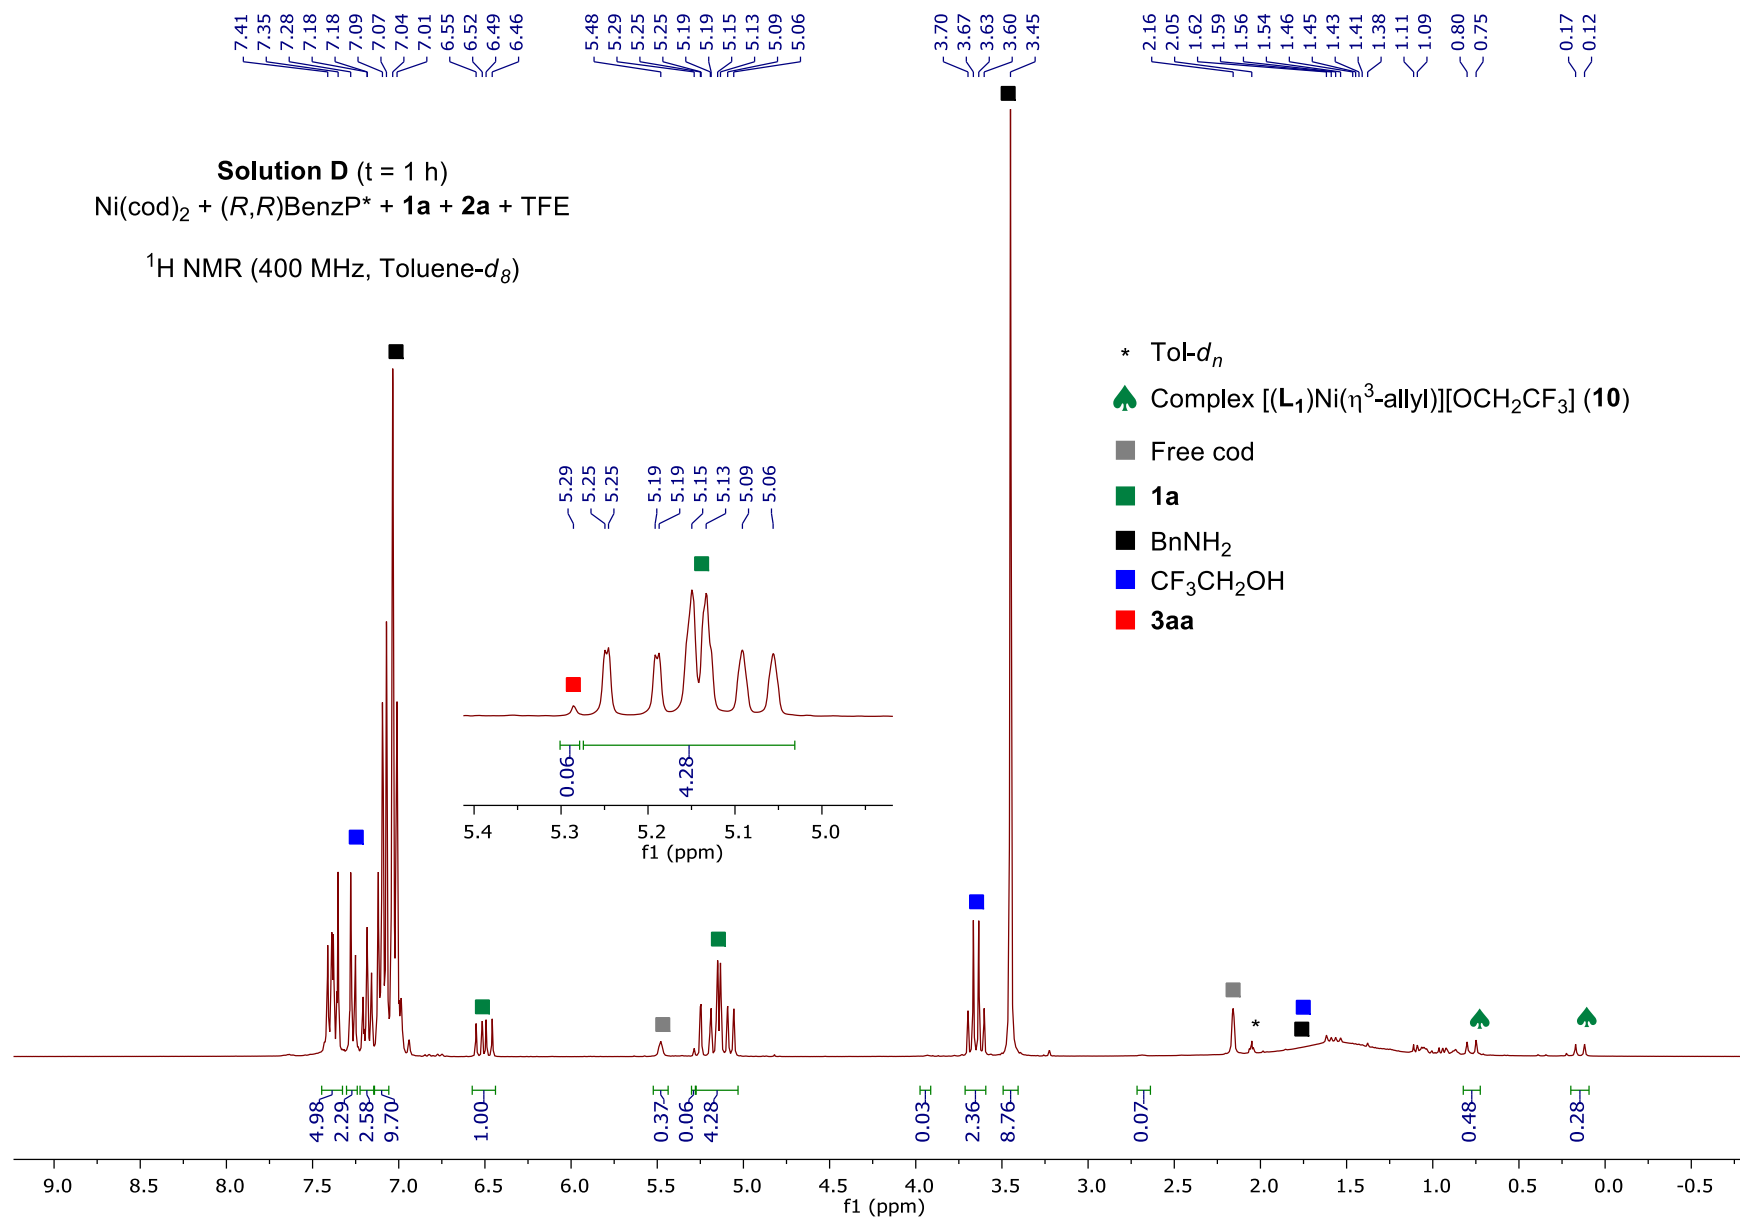

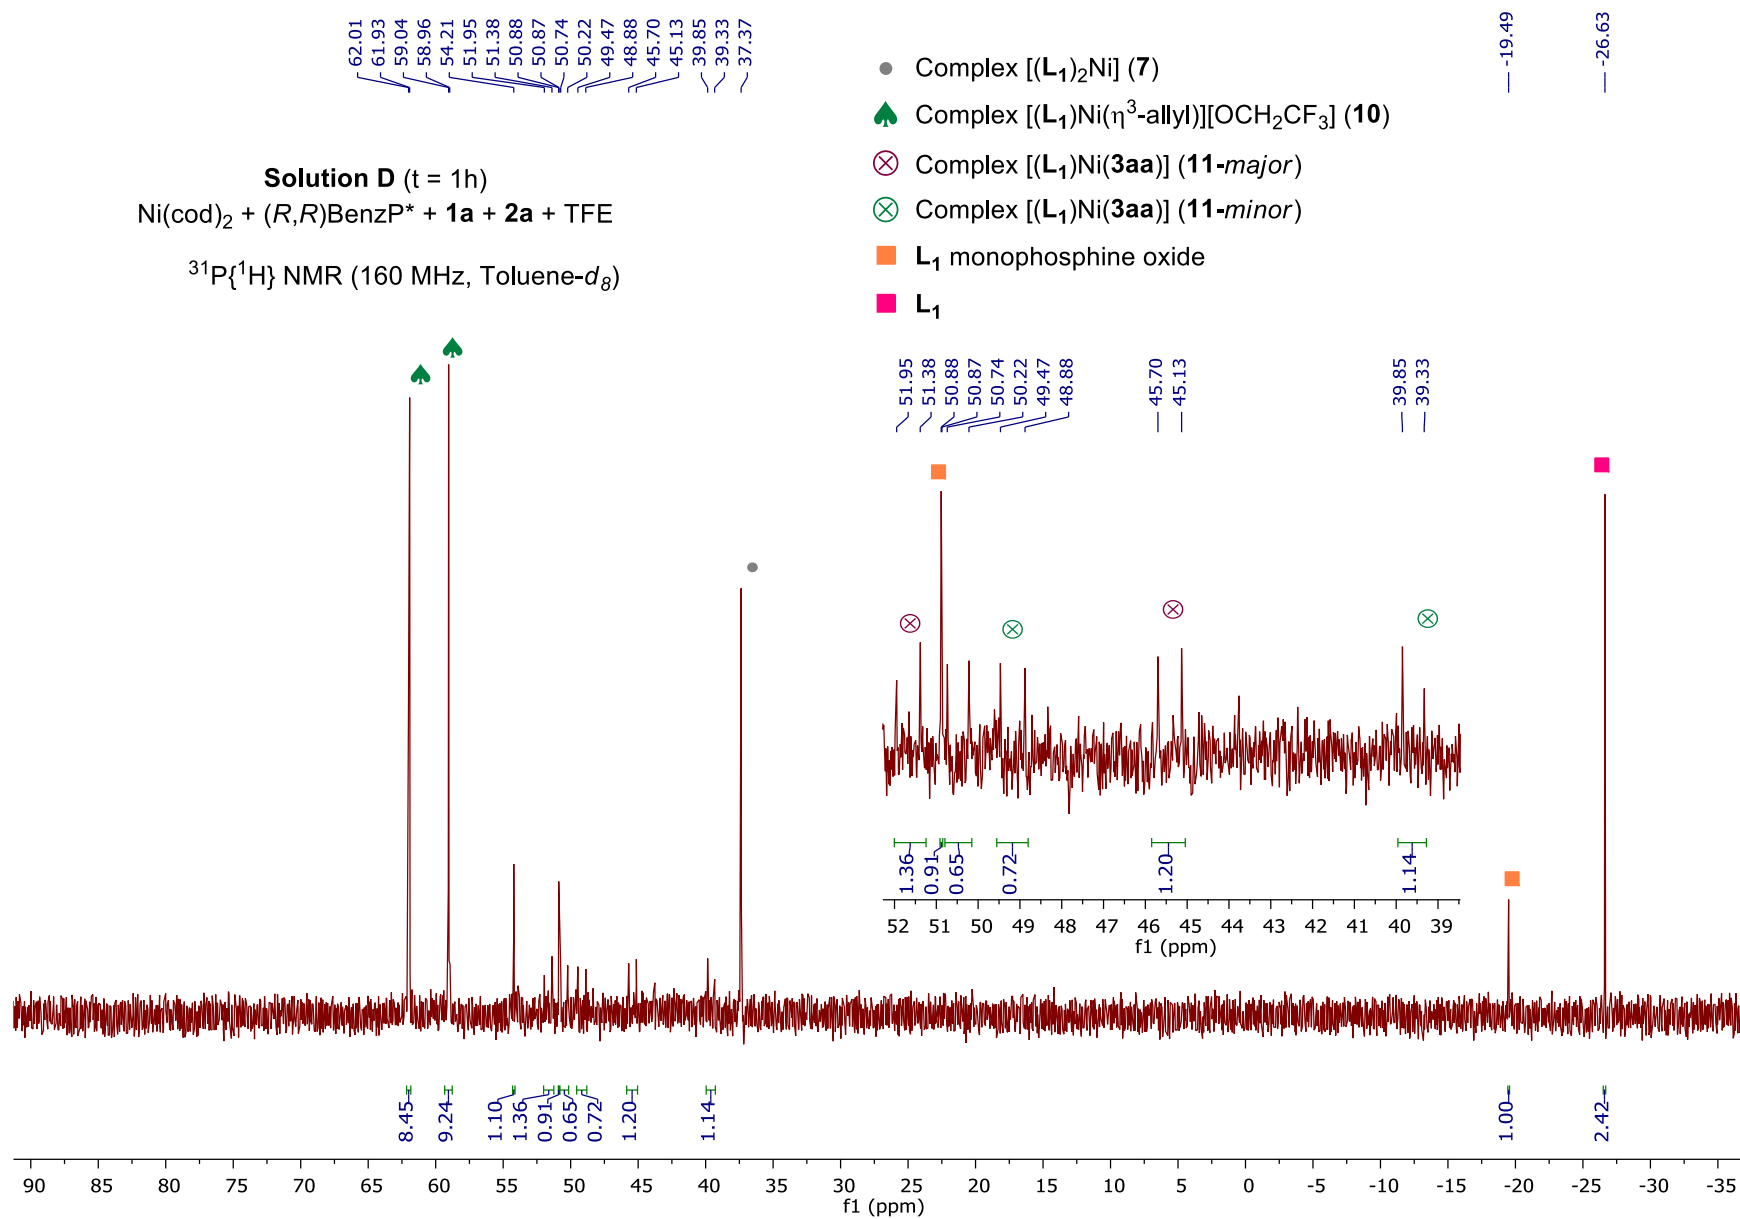



**Solution D** (t = 1 h)

$\text{Ni}(\text{cod})_2 + (R,R)\text{BenzP}^* + \mathbf{1a} + \mathbf{2a} + \text{TFE}$

$^{19}\text{F}\{^1\text{H}\}$  NMR (280 MHz, Toluene- $d_8$ )

♠ Complex  $[(\text{L}_1)\text{Ni}(\eta^3\text{-allyl})][\text{OCH}_2\text{CF}_3]$  (**10**)

■  $\text{CF}_3\text{CH}_2\text{OH}$

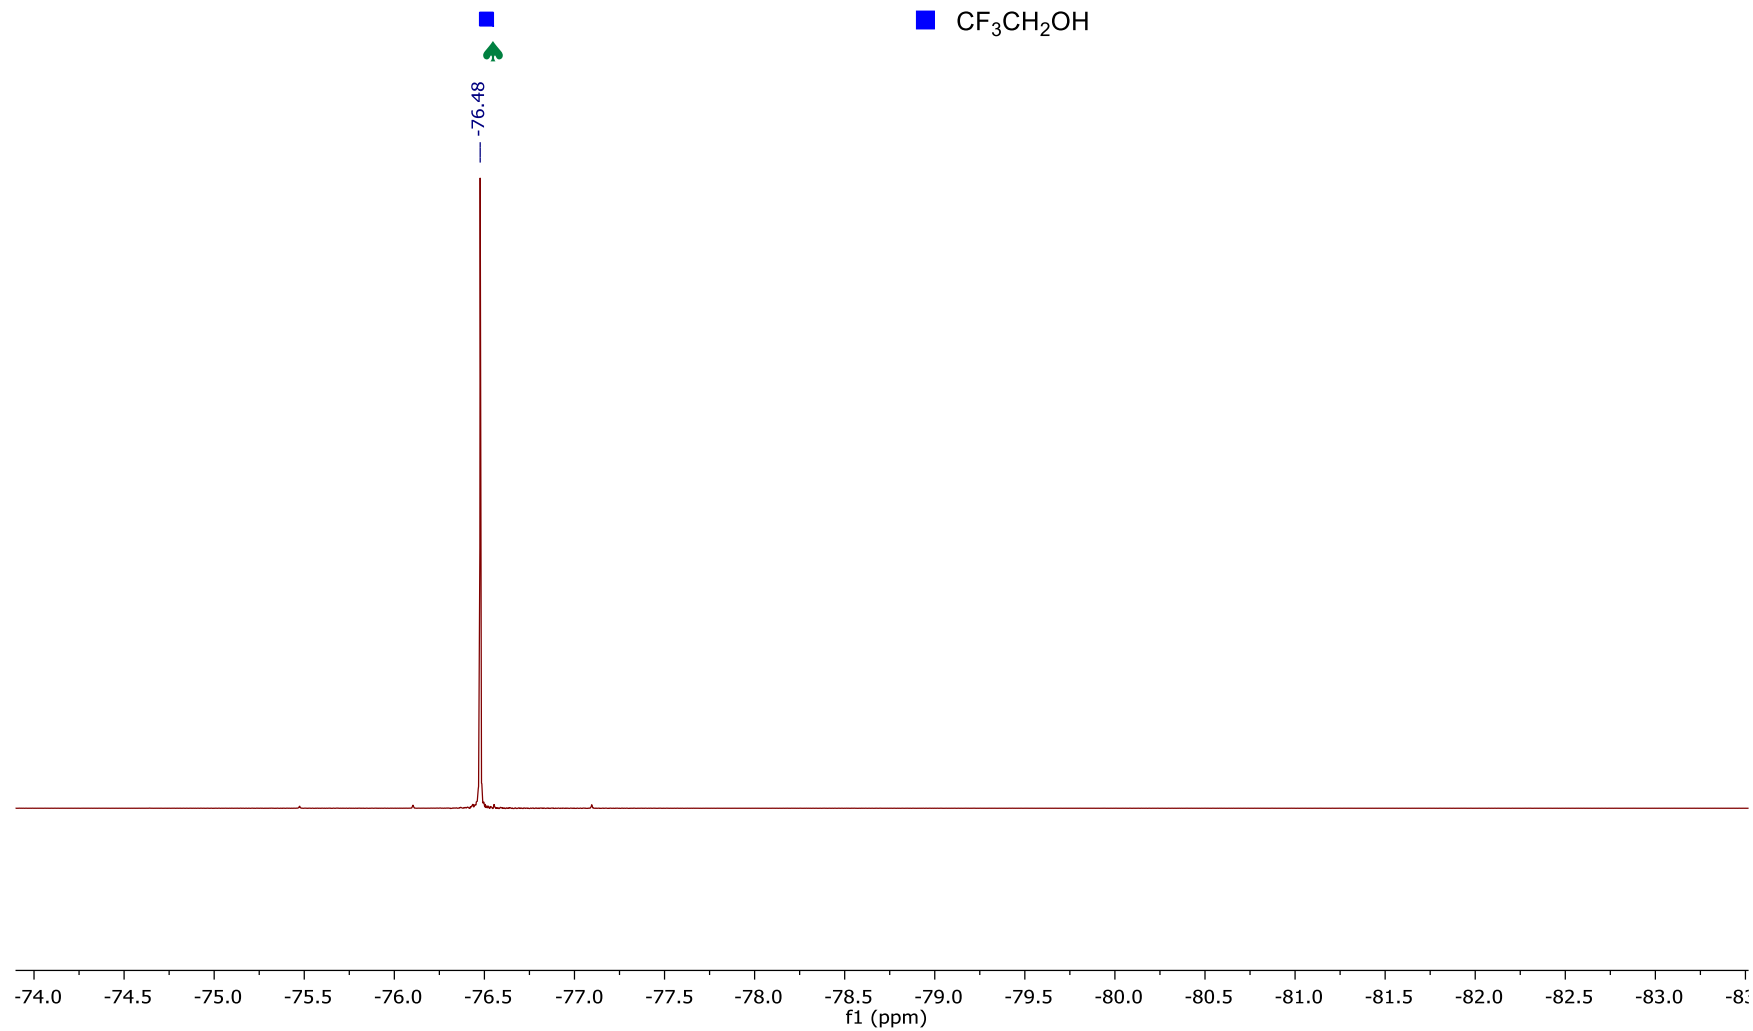

**Solution D** (t = 3 to 56 h)  
 $\text{Ni(cod)}_2 + (R,R)\text{BenzP}^* + \mathbf{1a} + \mathbf{2a} + \text{TFE}$

$^1\text{H}$  NMR (400 MHz, Toluene- $d_8$ )

Time = 56 h

Time = 46 h

Time = 32 h

Time = 22 h

Time = 14 h

Time = 3 h

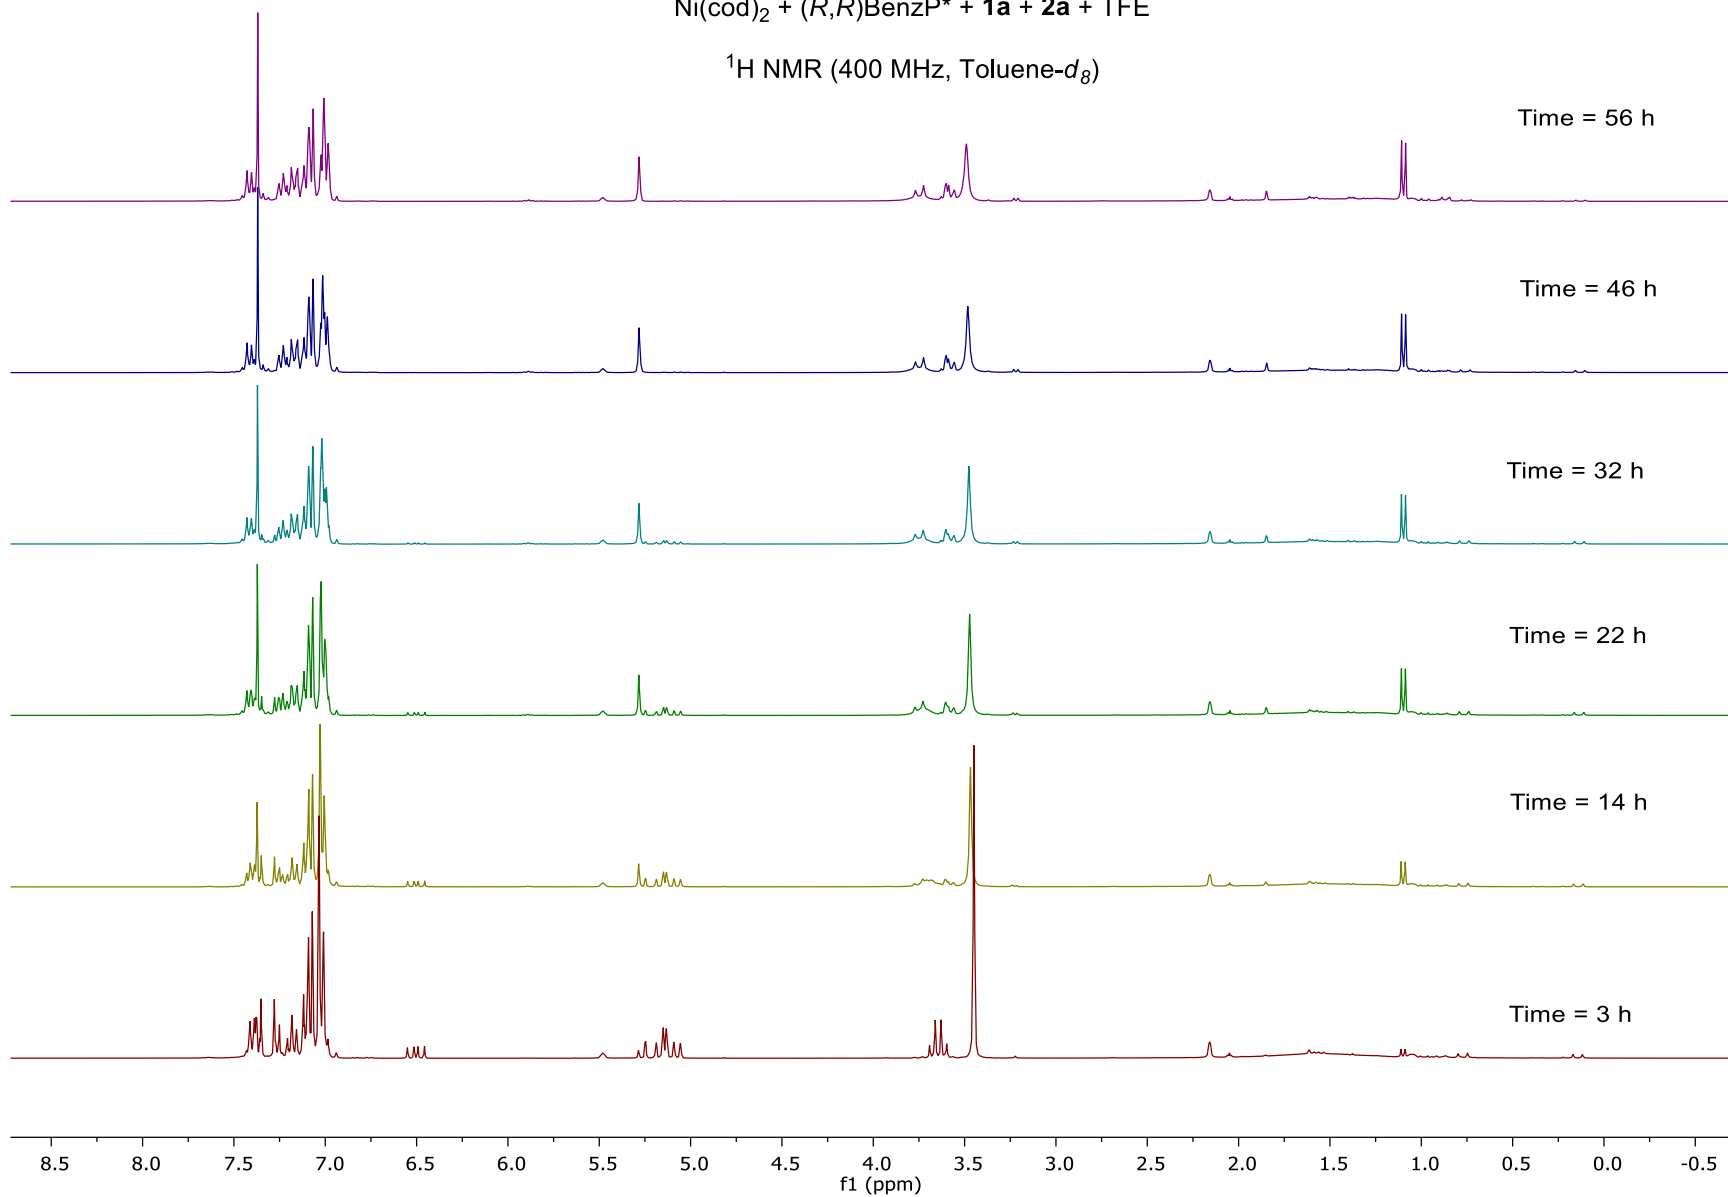

S70

**Solution D** (t = 3 to 56 h)  
 $\text{Ni(cod)}_2 + (R,R)\text{BenzP}^* + \mathbf{1a} + \mathbf{2a} + \text{TFE}$

$^{31}\text{P}$  NMR (160 MHz, Toluene- $d_8$ )

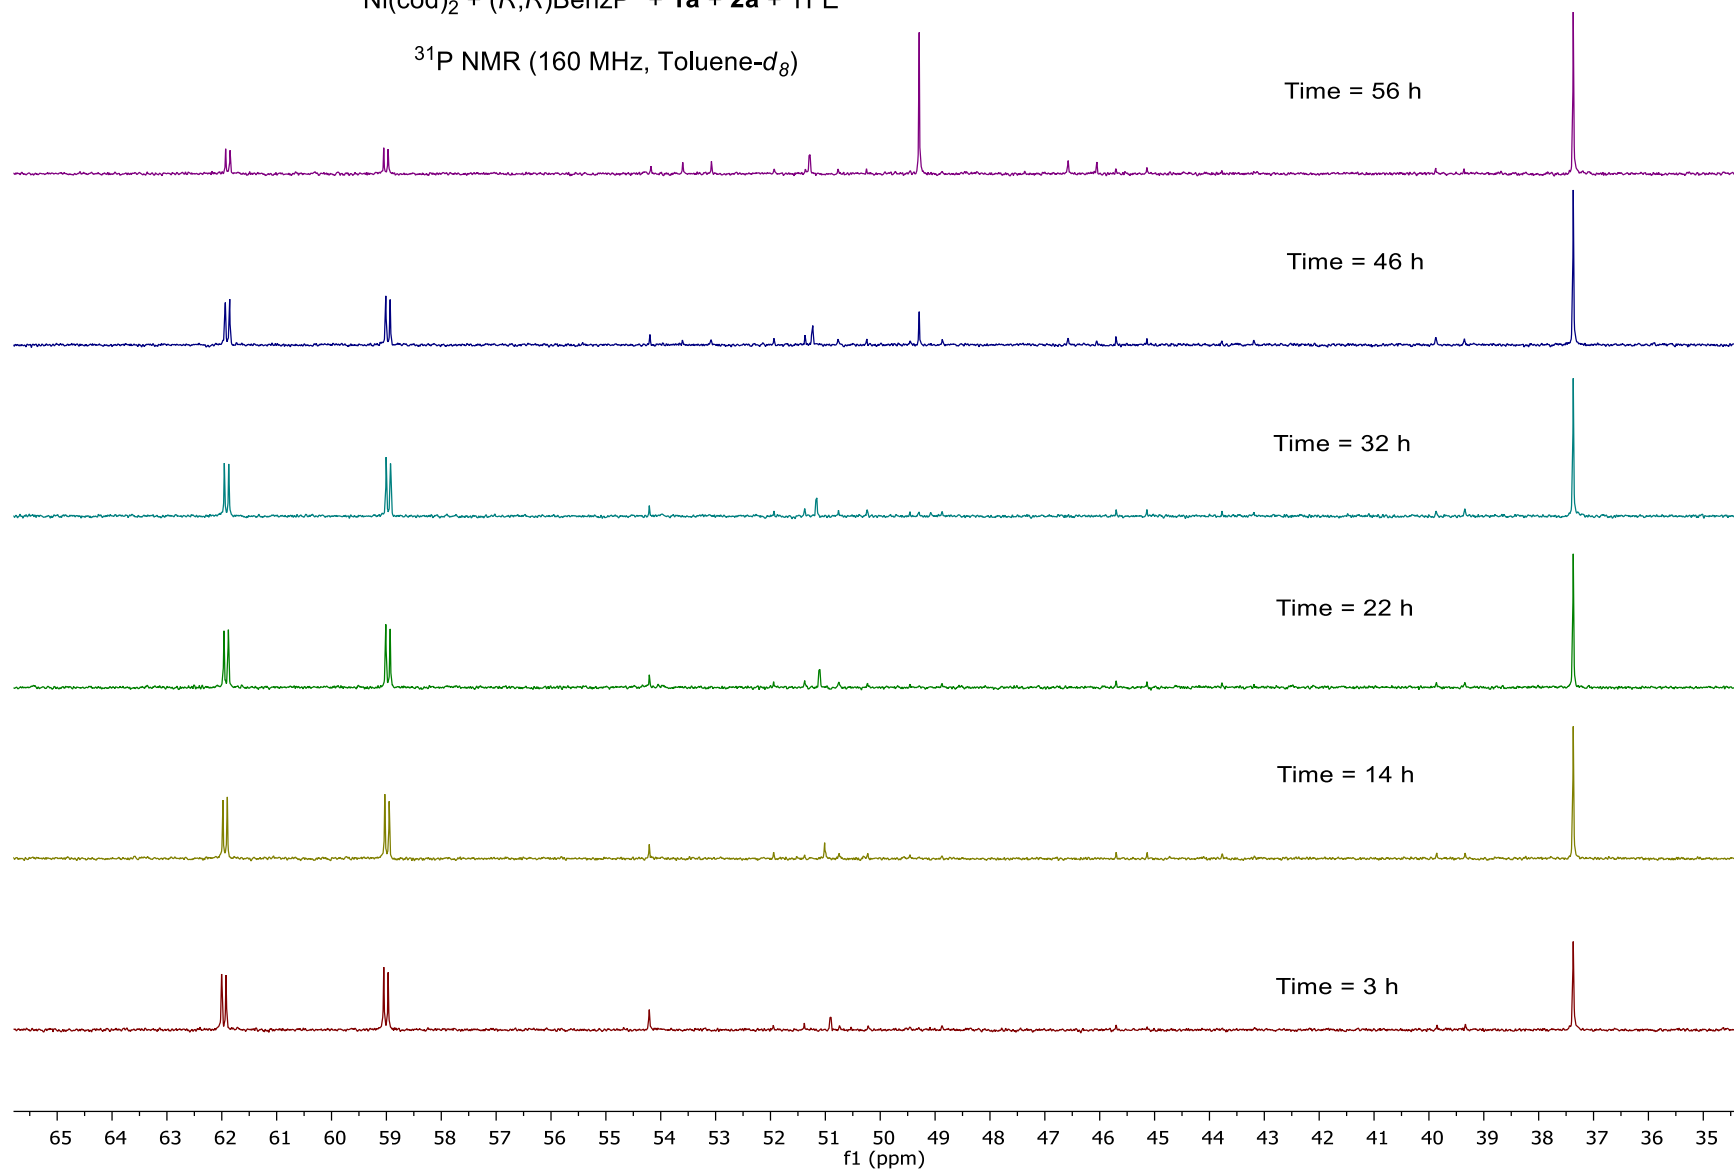

## 7.2. Synthesis of $[(L_1)_2Ni]$ (7)

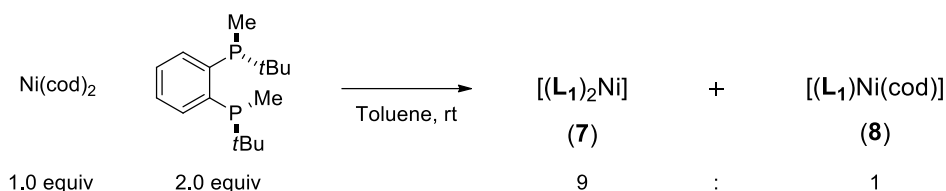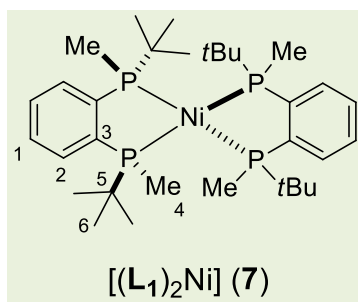

In a  $N_2$ -filled glovebox, a solution of  $Ni(cod)_2$  (13.8 mg, 0.05 mmol, 1.0 equiv) and  $(R,R)\text{-BenzP}^* L_1$  (28.2 mg, 0.10 mmol, 2.0 equiv) in toluene (1.0 mL) was stirred for 2 h, then subjected to vacuum for 1 h. The resulting red-orange oil was dissolved in toluene (1.0 mL), and subjected to three supplementary cycles of stirring (1 h)/vacuum (1 h)/dissolution (toluene, 1.0 mL), leading to a mixture of homoleptic complex  $[(L_1)_2Ni]$  (7) and  $[(L_1)Ni(cod)]$  (8) (red-orange oil, 33 mg, 9:1 ratio in favor of 7).

$^1H$  NMR (500 MHz, Toluene- $d_8$ )  $\delta$  (ppm) = 7.71 – 7.64 (m, 2H, H-1), 7.12 – 7.07 (m, 2H, H-2), 1.68 (s, 6H, H-4), 1.14 – 1.09 (m, 9H, H-6).

$^{13}C\{^1H\}$  NMR (130 MHz, Toluene- $d_8$ )  $\delta$  (ppm) = 149.9 – 148.9 (m, C-3), 129.3 ( $p_{app}$ ,  $J_{PC}$  = 3 Hz, CH-2), 127.1 (CH-1), 32.2 ( $p_{app}$ ,  $J_{PC}$  = 7 Hz, C-5), 28.9 ( $p_{app}$ ,  $J_{PC}$  = 3 Hz, CH<sub>3</sub>-6), 15.8 ( $p_{app}$ ,  $J_{PC}$  = 8 Hz, CH<sub>3</sub>-4).

$^{31}P\{^1H\}$  NMR (160 MHz, Toluene- $d_8$ )  $\delta$  (ppm) = 37.37.

## 7.3. Synthesis of $[(L_1)Ni(cod)]$ (8)

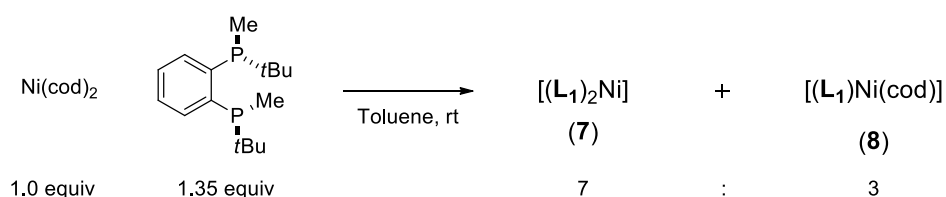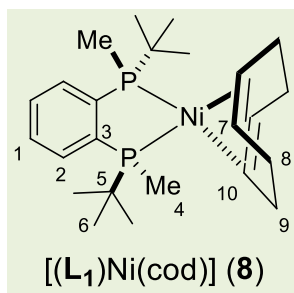

In a  $N_2$ -filled glovebox, a solution of  $Ni(cod)_2$  (6.9 mg, 0.025 mmol, 1.0 equiv) and  $(R,R)\text{-BenzP}^* L_1$  (7.8 mg, 0.0275 mmol, 1.1 equiv) in toluene (1.0 mL) was stirred for 2 h, then subjected to vacuum for 1 h. The resulting red-orange oil was dissolved in toluene (1.0 mL), and subjected to three supplementary cycles of stirring (1 h)/vacuum (1 h)/dissolution (toluene, 1.0 mL). Additional amounts of  $(R,R)\text{-BenzP}^*$  (1.5 mg, 0.0053 mmol, 0.25 equiv) were then added, followed by toluene (1.0 mL) and the reaction mixture was subjected to three cycles of stirring (1 h)/vacuum



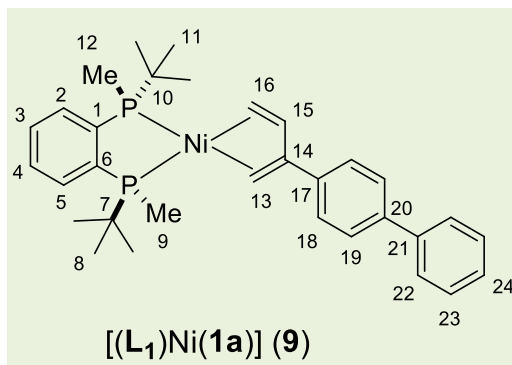

**$^{13}C\{^1H\}$  NMR** (130 MHz, Toluene- $d_8$ )  $\delta$  (ppm) = 147.6 – 145.8 (C-1 or C-6), 144.4 (C-Ar), 141.8 (C-Ar), 138.3 (C-Ar), 130.6 (d,  $^1J_{PC}$  = 11 Hz, CH-2 or CH-5), 130.1 (d,  $^1J_{PC}$  = 11 Hz, CH-2 or CH-5), 129.2 (CH-Ar), 128.9 (CH-Ar), 128.4 (CH-Ar), 127.6– 127.1 (m, CH-Ar), 127.1 (CH-Ar), 127.0 (CH-Ar), 126.9 (CH-Ar), 126.5 (CH-Ar), 32.7 – 32.2 (m, C-7 or C-10), 31.9 (dd,  $^1J_{PC}$  = 16,  $^4J_{PC}$  = 4 Hz, C-7 or C-10), 27.4 ( $t_{app}$ ,  $J_{PC}$  = 7 Hz, CH<sub>3</sub>-8 and CH<sub>3</sub>-11), 9.9 (CH<sub>3</sub>-9 or CH<sub>3</sub>-12), 7.1 (CH<sub>3</sub>-9 or CH<sub>3</sub>-12).

**$^{31}P\{^1H\}$  NMR** (160 MHz, Toluene- $d_8$ )  $\delta$  (ppm) = 57.91(broad), 40.44 (broad).

### 7.5. Synthesis of $[(L_1)Ni(\eta^3\text{-allyl})][OCH_2CF_3]$ (10)

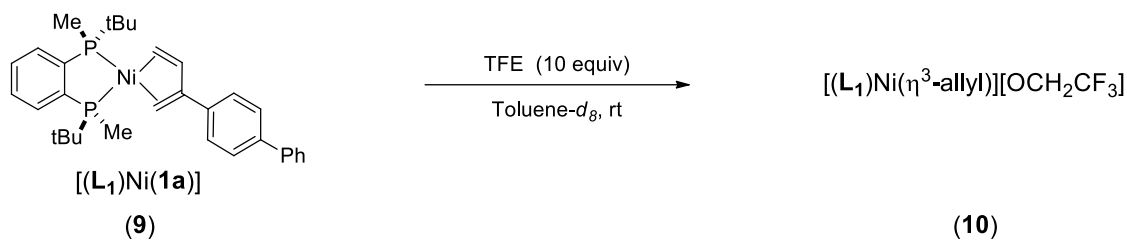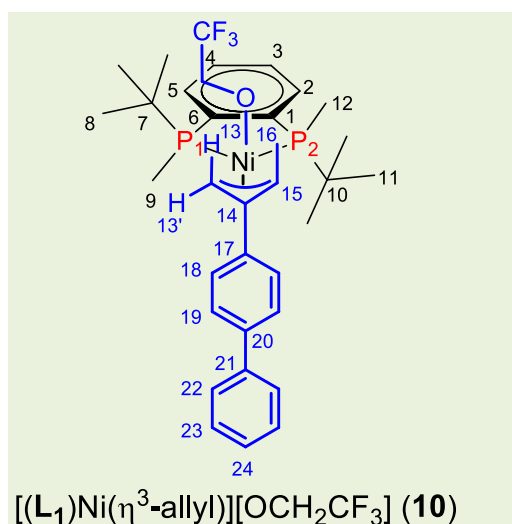

In a N<sub>2</sub>-filled glovebox, a 2 mL vial was charged with complex  $[(L_1)Ni(1a)]$  (9) (5.5 mg, 0.010 mmol, 1.0 equiv), followed by toluene- $d_8$  (0.60 mL). To the resulting orange solution was added a 1.0 M solution of CF<sub>3</sub>CH<sub>2</sub>OH in toluene- $d_8$  (0.10 mL, 0.10 mmol, 10.0 equiv). The solution immediately changed color to pale orange/yellow. 0.40 mL of this solution was introduced in a J-Young tube and analyzed by NMR.

*Due to the reversible nature of the reaction, the complex  $[(L_1)Ni(\eta^3\text{-allyl})][OCH_2CF_3]$  (10) could only be observed in solution. Indeed, in vacuum concentration of this solution resulted in quantitative regeneration of the starting complex  $[(L_1)Ni(1a)]$  (9).*

**$^1H$  NMR** (500 MHz, Toluene- $d_8$ )  $\delta$  (ppm) = 7.49 – 7.31 (m, 8H, H-Ar), 7.23 (t,  $^3J_{HH}$  = 7.7 Hz, 2H, H-Ar), 7.16 – 7.12 (m, 1H, H-24), 7.11 – 7.09 (m, 2H, H-18), 5.43 – 5.20 (m, 1H, H-15), 3.90 – 3.86 (m, 1H, H-13'), 2.72 – 2.67 (m, 1H, H-13), 1.54 (d,  $^2J_{PH}$  = 8.5 Hz, 3H, H-9), 1.50

(d,  $^2J_{\text{PH}} = 8.5$  Hz, 3H, H-12), 0.90 – 0.86 (m, 3H, H-16), 0.80 (d,  $^3J_{\text{PH}} = 15.6$  Hz, 9H, H-8), 0.16 (d,  $^3J_{\text{PH}} = 15.6$  Hz, 9H, H-11).

$^{13}\text{C}\{^1\text{H}\}$  NMR (130 MHz, Toluene- $d_8$ )  $\delta$  (ppm) = 143.3 (C-20), 139.8 (C-21), 139.5 – 138.5 (m, C-1 and C-6), 137.1 (C-17), 132.3 – 131.9 (CH-2 or CH-5), 131.8 (d,  $^2J_{\text{PP}} = 14$  Hz, CH-2 or CH-5), 129.3 (CH-22), 128.4 (CH-24), 127.6 (CH-3 or CH-4), 127.2 (CH-3 or CH-4), 123.1 (C-14), 76.7 (d,  $^2J_{\text{PP}} = 15$  Hz, CH-15), 55.2 (dd,  $^2J_{\text{PP}} = 19$ , 3 Hz, CH<sub>2</sub>-13), 32.9 (d,  $^2J_{\text{PP}} = 14$  Hz, C-7 or C-10), 32.7 (d,  $^1J_{\text{PP}} = 13$  Hz, C-7 or C-10), 26.9 (d,  $^2J_{\text{PP}} = 5$  Hz, CH<sub>3</sub>-8), 25.9 (d,  $^2J_{\text{PP}} = 5$  Hz, CH<sub>3</sub>-11), 14.8 (CH<sub>3</sub>-16), 7.7 (d,  $^1J_{\text{PP}} = 25$  Hz, CH<sub>3</sub>-9), 5.3 (d,  $^1J_{\text{PP}} = 24$  Hz, CH<sub>3</sub>-12).

$^{31}\text{P}\{^1\text{H}\}$  NMR (160 MHz, Toluene- $d_8$ )  $\delta$  (ppm) = 61.51 (d,  $^3J_{\text{PP}} = 9.7$  Hz, P-1), 58.58 (d,  $^3J_{\text{PP}} = 9.7$  Hz, P-2).

$^{19}\text{F}\{^1\text{H}\}$  NMR (280 MHz, Toluene- $d_8$ )  $\delta$  (ppm) = -76.87.

## 7.6. Synthesis of $[(\text{L}_1)\text{Ni}(\mathbf{3aa})]$ (**11**)

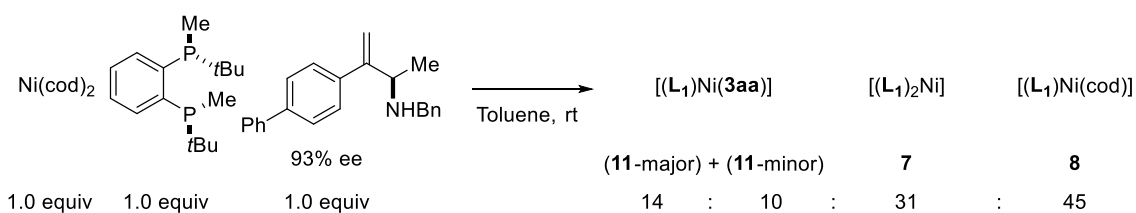

In a  $\text{N}_2$ -filled glovebox, to a solution of  $\text{Ni}(\text{cod})_2$  (8.8 mg, 0.032 mmol, 1.0 equiv) and  $(R,R)\text{BenzP}^* \text{L}_1$  (9.0 mg, 0.032 mmol, 1.0 equiv) in toluene (0.50 mL) was added  $\mathbf{3aa}$  (10.0 mg, 0.032 mmol, 1.0 equiv, 93% ee). The resulting solution was stirred for 1.0 h, then subjected to high vacuum for 1 h. The resulting red-orange oil was dissolved in toluene (1.0 mL), and subjected to ten supplementary cycles of stirring (1 h)/vacuum (1 h)/dissolution (toluene, 1.0 mL), leading to a mixture of two product-bound complexes  $[(\text{L}_1)\text{Ni}(\mathbf{3aa})]$  (**11-major**) and  $[(\text{L}_1)\text{Ni}(\mathbf{3aa})]$  (**11-minor**), along with  $[(\text{L}_1)_2\text{Ni}]$  (**7**) and  $[(\text{L}_1)\text{Ni}(\text{cod})]$  (**8**) (red-orange oil, 18.0 mg, ratio **11-major**/**11-minor**/**7**/**8**=14:10:31:45).

*Due to the complexity of mixture, it was not possible to fully attribute the  $^1\text{H}$  and  $^{13}\text{C}$  NMR peaks present in the spectrum. Nevertheless, we are confident that the observed peaks and correlations for **11-major** are consistent with a  $[(\text{L}_1)\text{Ni}(\mathbf{3aa})]$  complex bound through the olefin  $\pi$ -system of  $\mathbf{3aa}$ . Whether the nitrogen is bound or not is unclear. Only the peaks that could be attributed with confidence to this complex are reported. Due to numerous overlaps, we were not able to perform such an analysis for **11-minor**, and the corresponding peaks are not reported.*

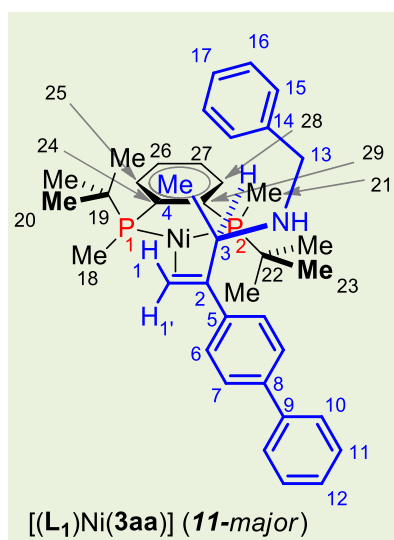

**<sup>1</sup>H NMR** (500 MHz, Toluene-*d*<sub>8</sub>)  $\delta$  (ppm) = 4.31 – 4.25 (m, 1H, H-3), 4.07 – 4.02 (m, 1H, H-13), 3.89 – 3.84 (m, 1H, H-13), 3.25 (q<sub>app</sub>,  $J$  = 4.5 Hz, 1H, H-1'), 2.53 (dt<sub>app</sub>,  $J$  = 7.7, 4.1 Hz, 1H, H-1'), 1.65 (d,  $^3J_{HH}$  = 5.8 Hz, 3H, H-4), 1.29 (d,  $^2J_{PH}$  = 4.5 Hz, 3H, H-18), 1.01 (d,  $^3J_{PH}$  = 13.2 Hz, 9H, H-20), 0.78 (d,  $^3J_{PH}$  = 13.5 Hz, 9H, H-23), 0.63 (d,  $^2J_{PH}$  = 5.2 Hz, 3H, H-21).

**<sup>13</sup>C{<sup>1</sup>H} NMR** (130 MHz, Toluene-*d*<sub>8</sub>)  $\delta$  (ppm) = 70.8 – 70.5 (m, C-2), 57.7 – 57.6 (m, CH-3), 49.1 (CH<sub>2</sub>-13), 34.8 (dd,  $^2J_{PP}$  = 22, 2 Hz, CH<sub>2</sub>-1), 27.5 (dd,  $^2J_{PP}$  = 8,  $^4J_{PP}$  = 3 Hz, CH<sub>3</sub>-20), 27.3 (d,  $^2J_{PP}$  = 9 Hz, CH<sub>3</sub>-23), 21.6 (CH<sub>3</sub>-4), 7.9 (dd,  $^1J_{PP}$  = 11,  $^4J_{PP}$  = 8 Hz, CH<sub>3</sub>-18), 4.7 (dd,  $^1J_{PP}$  = 12,  $^4J_{PP}$  = 5 Hz, CH<sub>3</sub>-21).

**<sup>31</sup>P{<sup>1</sup>H} NMR** (160 MHz, Toluene-*d*<sub>8</sub>)  $\delta$  (ppm) = 51.58 (d,  $^3J_{PP}$  = 69.4 Hz, P-1), 45.33 (d,  $^3J_{PP}$  = 69.4 Hz, P-2).



### 7.7. Reaction of $[(L_1)Ni(\eta^3\text{-allyl})][OCH_2CF_3]$ (**10**) with $BnNH_2$

In a  $N_2$ -filled glovebox, a 2 mL vial was charged with complex  $[(L_1)Ni(\mathbf{1a})]$  (**9**) (5.5 mg, 0.010 mmol, 1.0 equiv), followed by toluene- $d_8$  (0.60 mL). To the resulting orange solution was added a 1.0 M solution of  $CF_3CH_2OH$  in toluene- $d_8$  (0.10 mL, 0.10 mmol, 10.0 equiv). The solution immediately changed color to pale orange/yellow.  $BnNH_2$  (43.0 mg, 0.40 mmol, 40.0 equiv) was then added, and the reaction mixture was stirred for 15 min (solution **E**). 0.40 mL of this solution was introduced in a J-Young tube and analyzed by  $^1H$  and  $^{31}P\{^1H\}$  NMR.

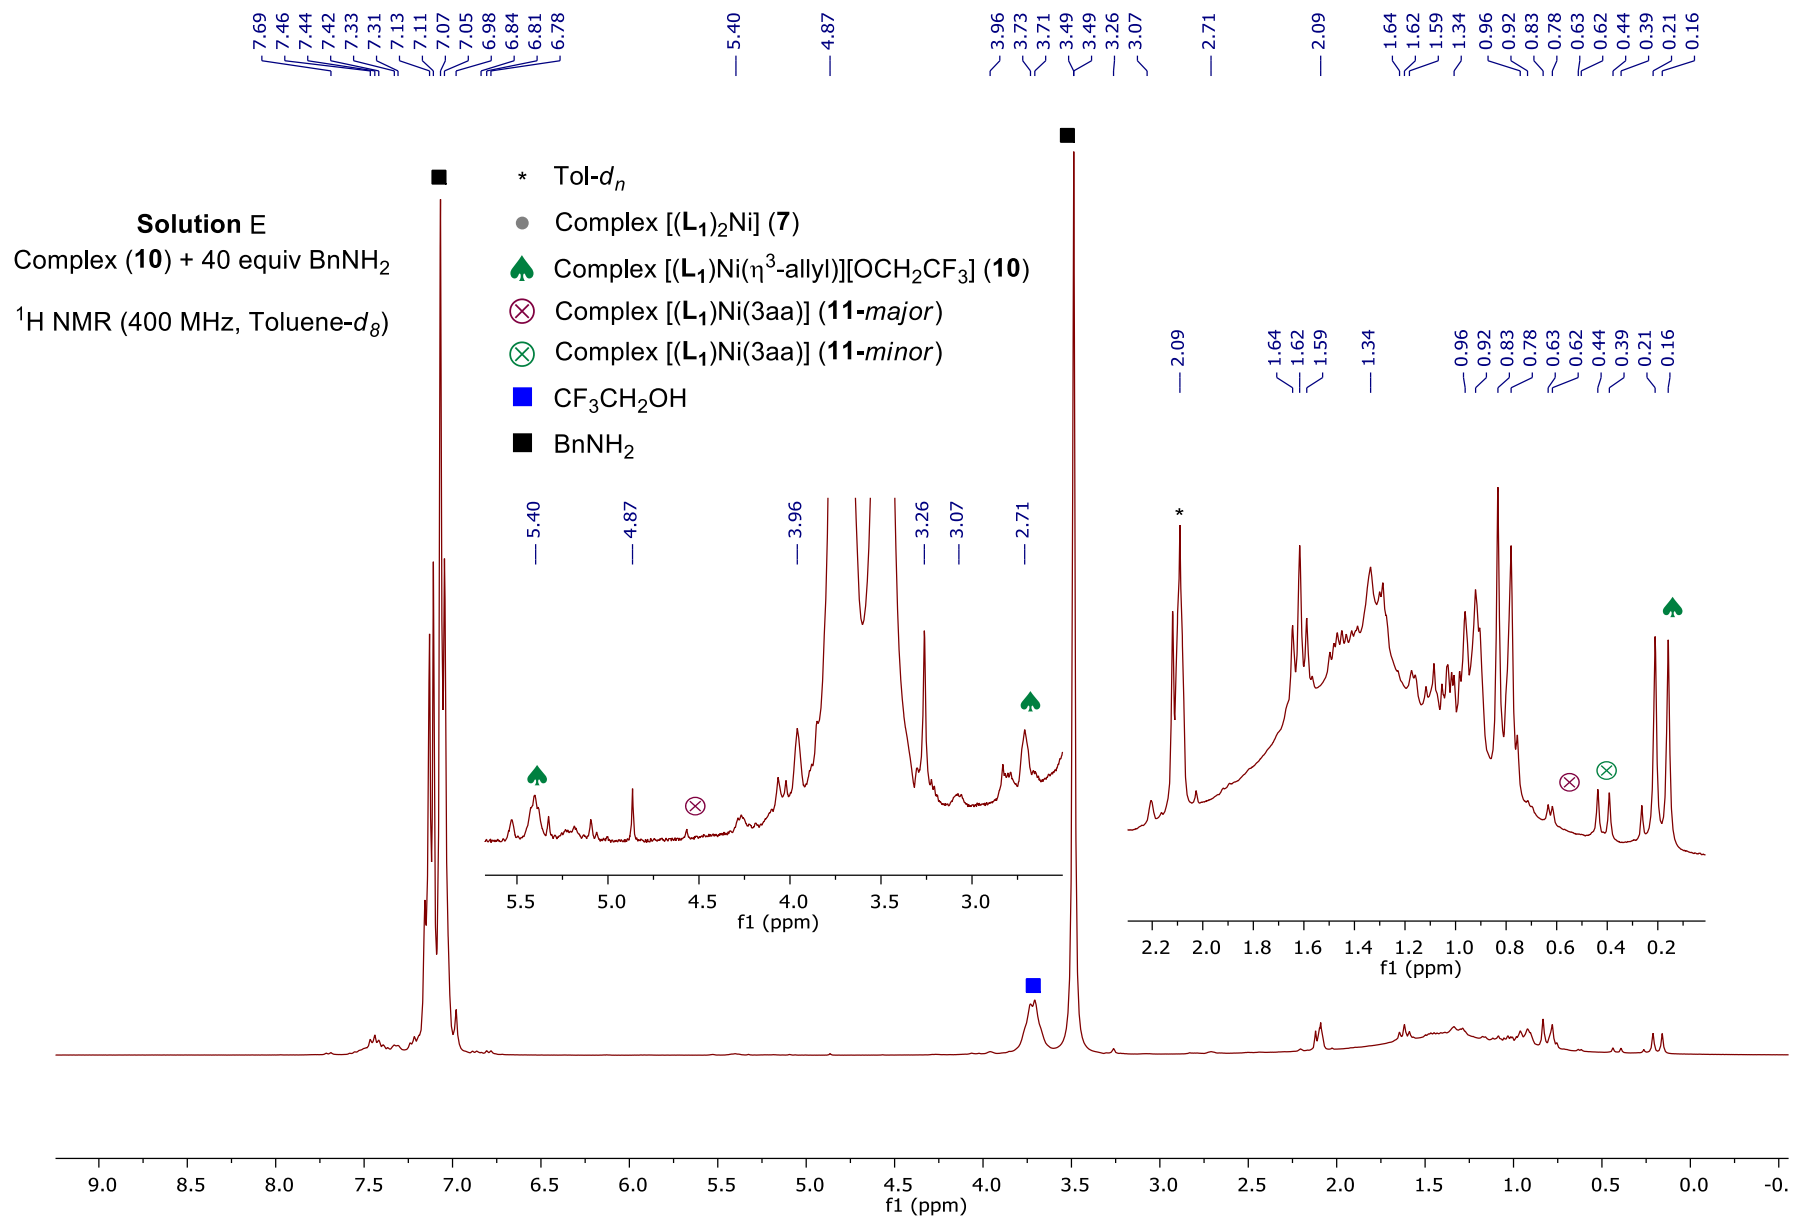

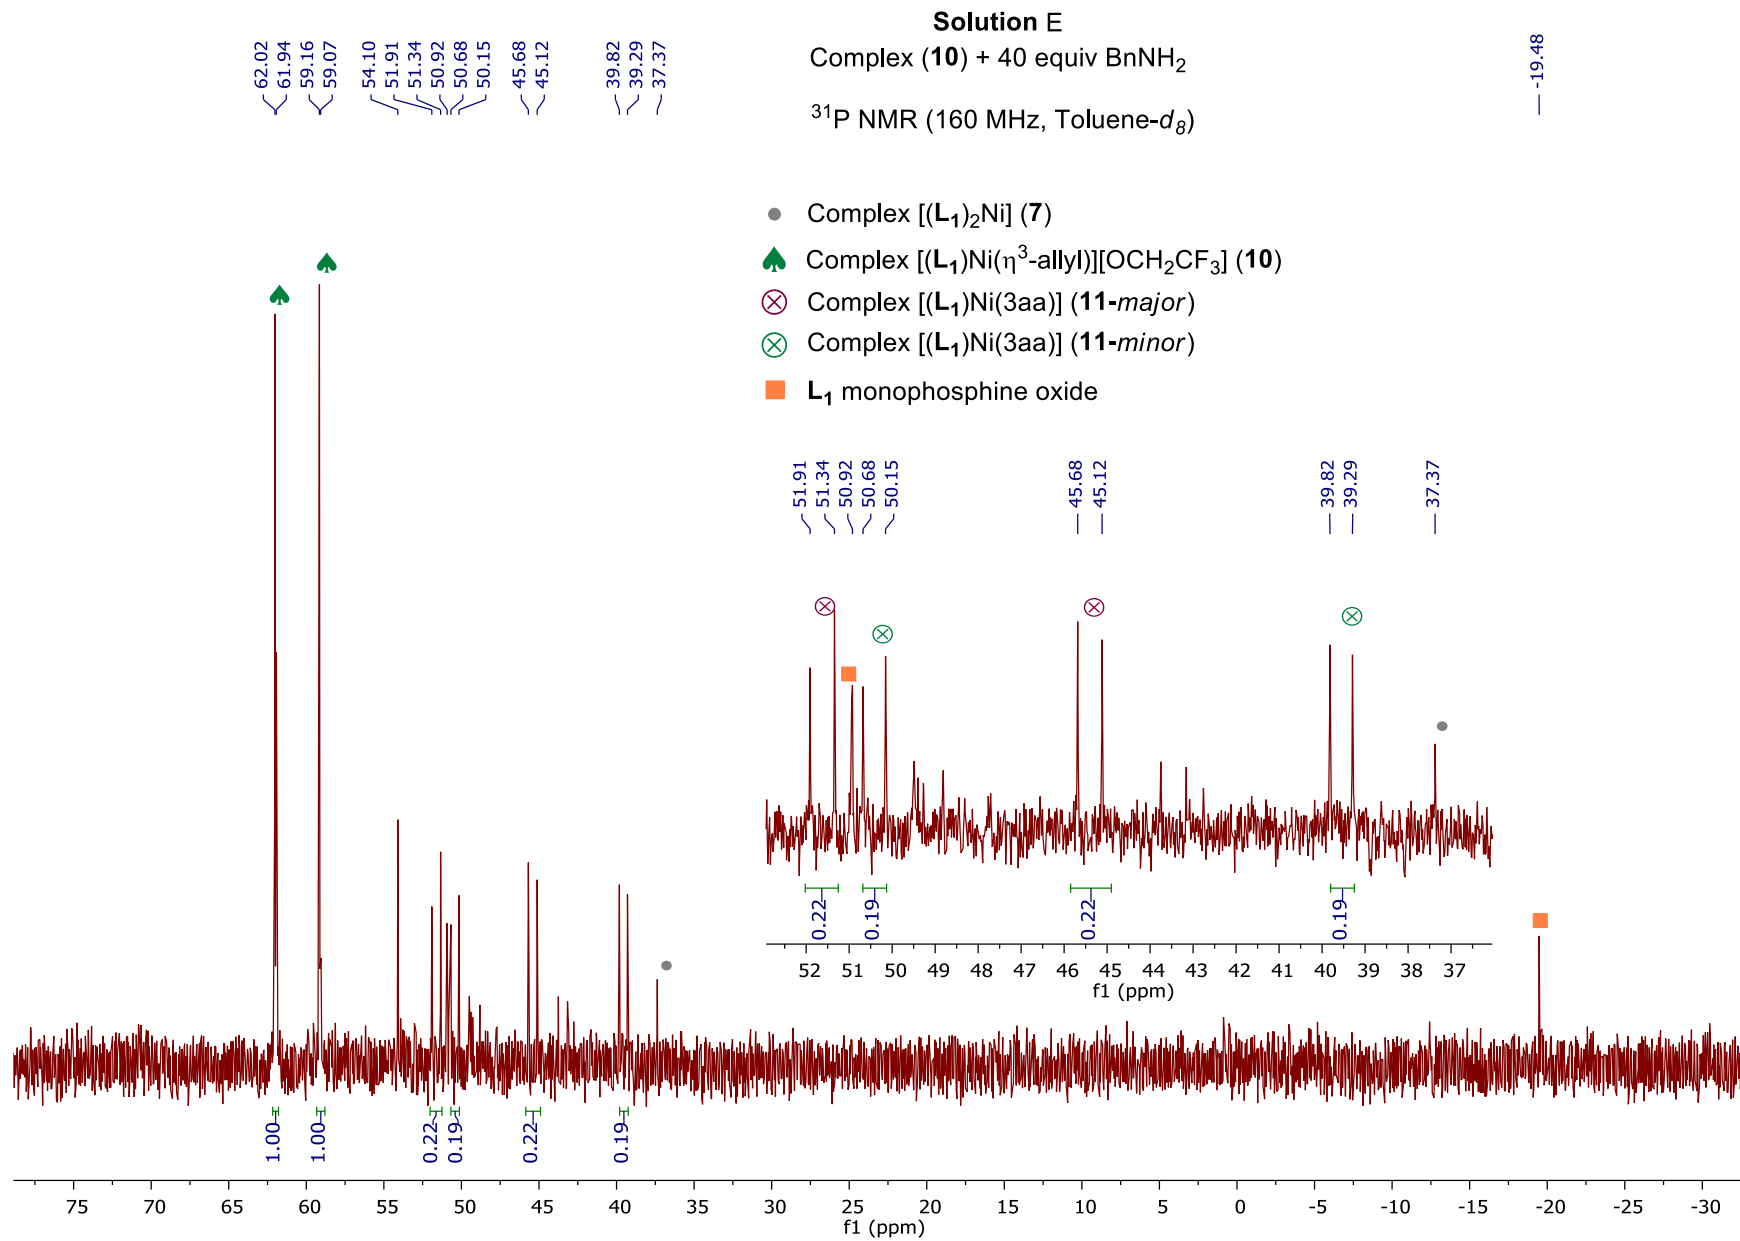

## 8. Amine exchange experiment

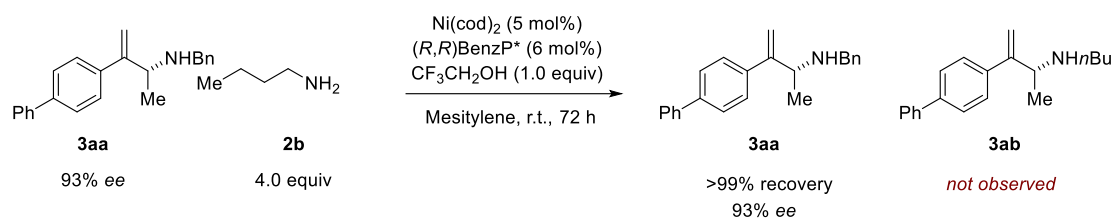

In a  $\text{N}_2$ -filled glovebox,  $\text{Ni(cod)}_2$  (1.4 mg, 0.005 mmol, 5 mol%) and  $(R,R)\text{-BenzP}^*$  **L**<sub>1</sub> (1.7 mg, 0.006 mmol, 6 mol%) were weighted in a 5 mL Schlenk tube, and anhydrous mesitylene (0.20 mL, 0.5 M) was added. After stirring at room temperature for 10 min, allylic amine **3aa** (31.0 mg, 0.10 mmol, 1.0 equiv, 93% ee), *n*BuNH<sub>2</sub> **2b** (40  $\mu\text{L}$ , 0.40 mmol, 4.0 equiv) and TFE (7  $\mu\text{L}$ , 0.10 mmol, 1.0 equiv) were added sequentially. The tube was sealed, taken out of the glovebox and stirred at room temperature for 72 h. The reaction mixture was filtered over a short pad of silica gel, washed with ethyl acetate (10 mL) and concentrated under vacuum to afford the crude mixture. Analysis by  $^1\text{H}$  NMR showed >99% recovery of **3aa** and no traces of product **3ab**.

## 9. Deuterium labeling experiments

### 9.1. Model catalytic hydroamination using TFE-*d*<sub>1</sub> and BnND<sub>2</sub>

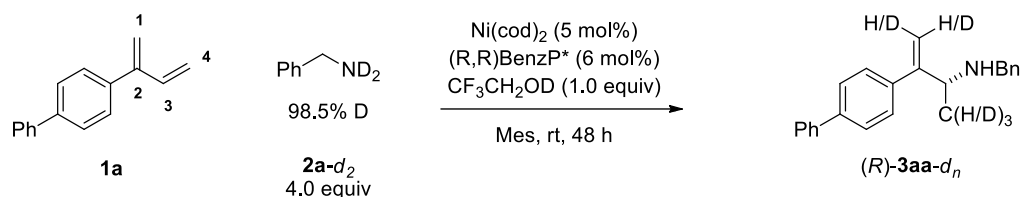

| Diene Cons. | Yield | ee  | Deuterium Incorporation |     |     |
|-------------|-------|-----|-------------------------|-----|-----|
|             |       |     | C1                      | C3  | C4  |
| >95%        | 76%   | 90% | 57.5%                   | <2% | 58% |

In a N<sub>2</sub>-filled glovebox, Ni(cod)<sub>2</sub> (3.4 mg, 0.0125 mmol, 5 mol%) and (*R,R*)-BenzP\* **L**<sub>1</sub> (4.2 mg, 0.015 mmol, 6 mol%) were weighted in a 5 mL Schlenk tube, and anhydrous mesitylene (0.50 mL, 0.5 M) was added. After stirring at room temperature for 10 min, diene **1a** (42.0 mg, 0.25 mmol, 1.0 equiv), TFE-*d*<sub>1</sub> (26.0 mg, 0.25 mmol, 1.0 equiv, 99.5% D) and Bn-ND<sub>2</sub> (110.0 mg, 1.00 mmol, 4.0 equiv, 98.5% D) were added sequentially. The tube was sealed, taken out of the glovebox and stirred at room temperature for 48 h. The reaction mixture was filtered over a short pad of silica gel, washed with ethyl acetate (10 mL) and concentrated under vacuum to afford the crude mixture. Consumption of **1a**: >95%. Purification by flash chromatography over silica gel (pentane:EtOAc = 4:1) led to the desired product **3aa-*d*<sub>n</sub>** as a pale yellow oil (60.0 mg, 76% yield, 90% ee). <sup>1</sup>H NMR analysis showed 58% deuterium integration at C-1 and 58% at C-4. No significant deuterium incorporation at any other position was observed.

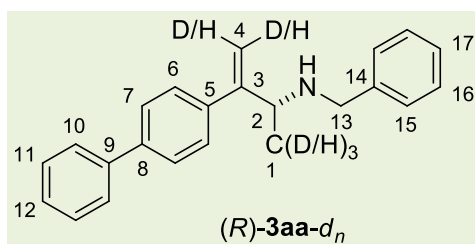

**<sup>1</sup>H NMR** (300 MHz, CDCl<sub>3</sub>) δ (ppm) = 7.67 – 7.56 (m, 4H, H-Ar), 7.53 – 7.43 (m, 4H, H-Ar), 7.42 – 7.29 (m, 6H, H-Ar), 5.42 – 5.34 (m, 0.85H, H-4), 3.92 (d, <sup>2</sup>J<sub>HH</sub> = 13.1 Hz, 1H, H-13), 3.87 – 3.76 (m, 2H, H-2 + H-13), 1.53 (s, 1H, N-H), 1.32 – 1.24 (m, 1.26H, H-1).

**<sup>13</sup>C{<sup>1</sup>H} NMR** (100 MHz, CDCl<sub>3</sub>) δ (ppm) = 152.3 – 150.9 (m, C-3), 141.08 (C-Ar), 141.05 (C-Ar), 140.4 (broad, C-Ar), 128.9 (CH-Ar), 128.6 (CH-Ar), 128.4 (CH-Ar), 127.6 (CH-Ar), 127.4 (CH-Ar), 127.2 (CH-Ar), 127.1 (CH-Ar), 127.0 (CH-Ar), 113.20 – 112.02 (C(H/D)<sub>2</sub>-4), 57.19 – 55.93 (C(H/D)<sub>1</sub>-2), 51.6 (CH<sub>2</sub>-13), 22.0 – 20.9 (m, C(H/D)<sub>3</sub>-1).

**HRMS** (ESI<sup>+</sup>): calculated [M+H]<sup>+</sup> for C<sub>17</sub>H<sub>19</sub>DN<sub>2</sub>O<sup>+</sup>: 315.1942; found: 315.1969; 316.2030; 317.2091; 318.211 (major); 319.2205; 320.2244.

**HPLC**: 90% ee, chiral stationary column: OD-H, mobile phase: hexane/*i*PrOH = 99/1, 1 mL/min, 254 nm, 30 °C, t<sub>R</sub> (major) = 6.83 min, t<sub>R</sub> (minor) = 15.14 min.

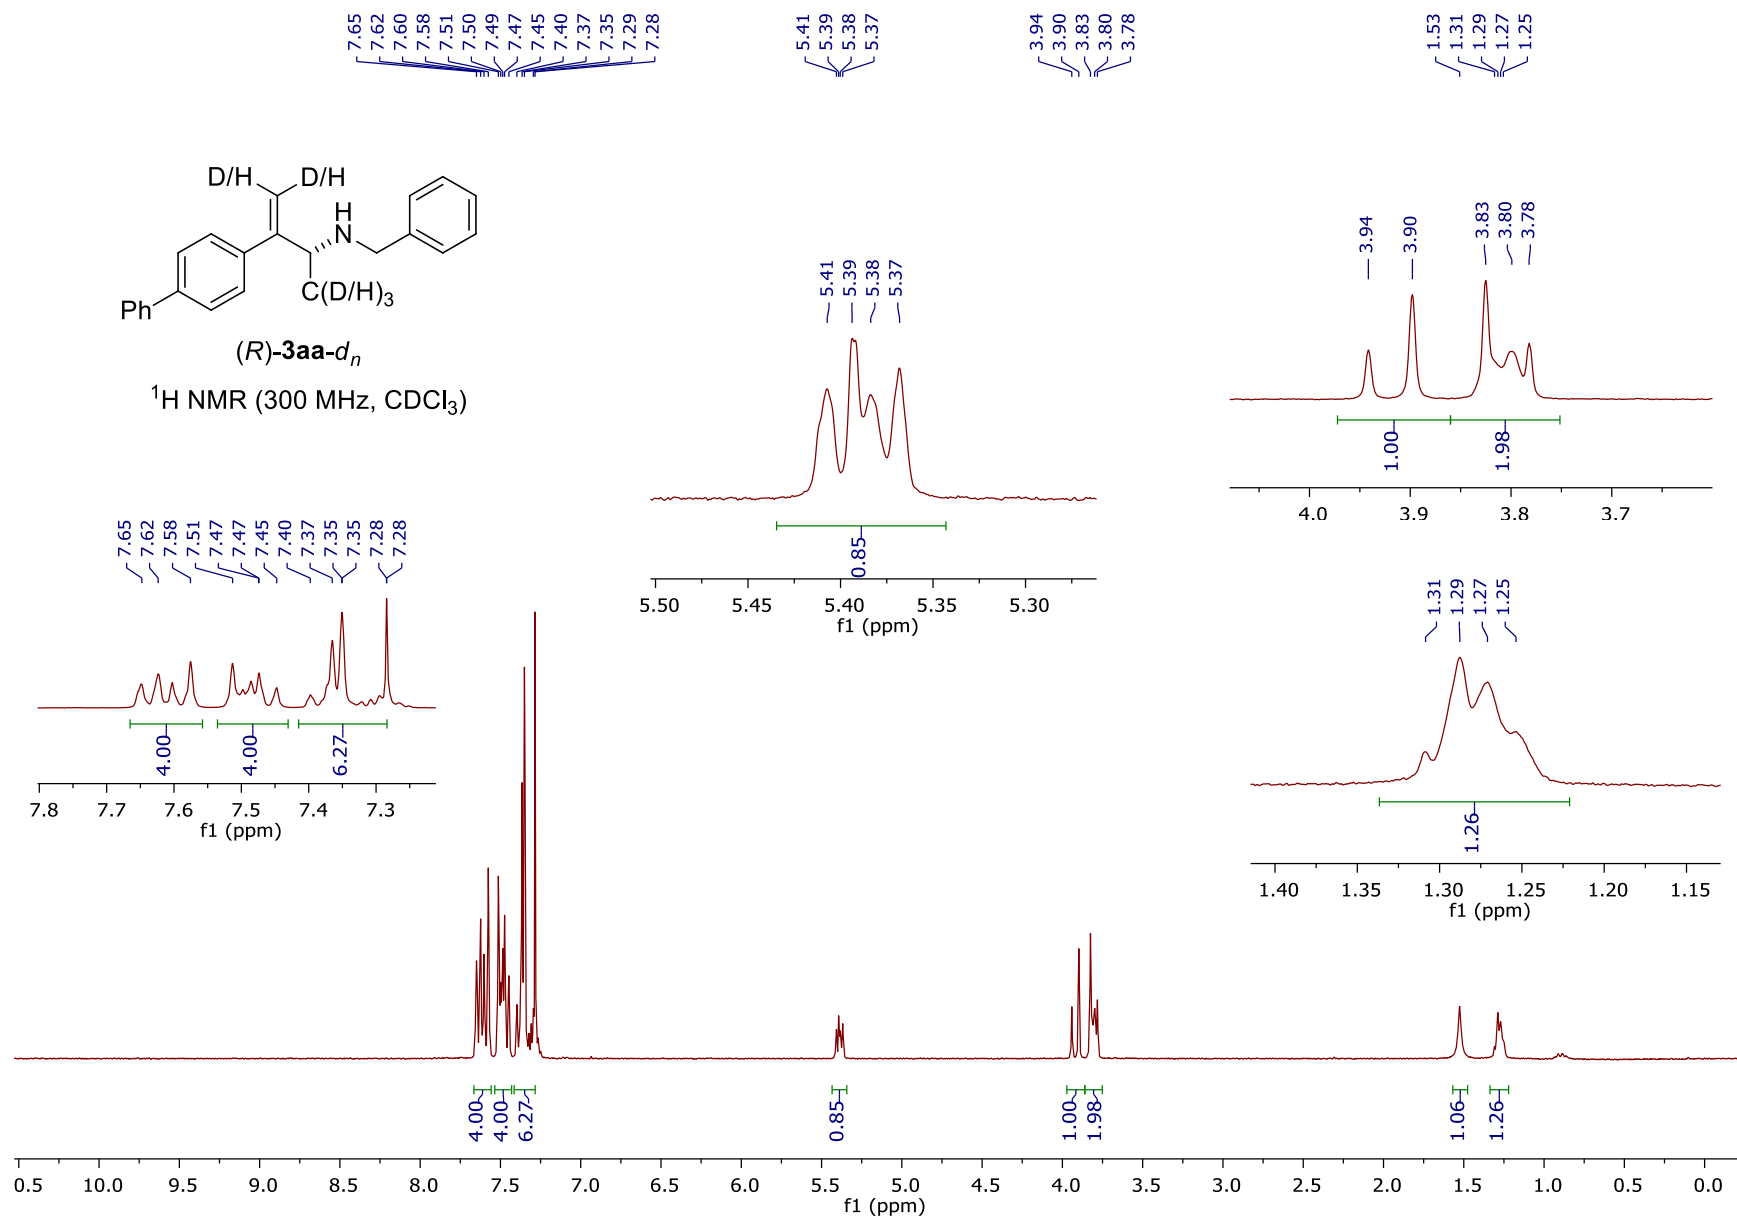

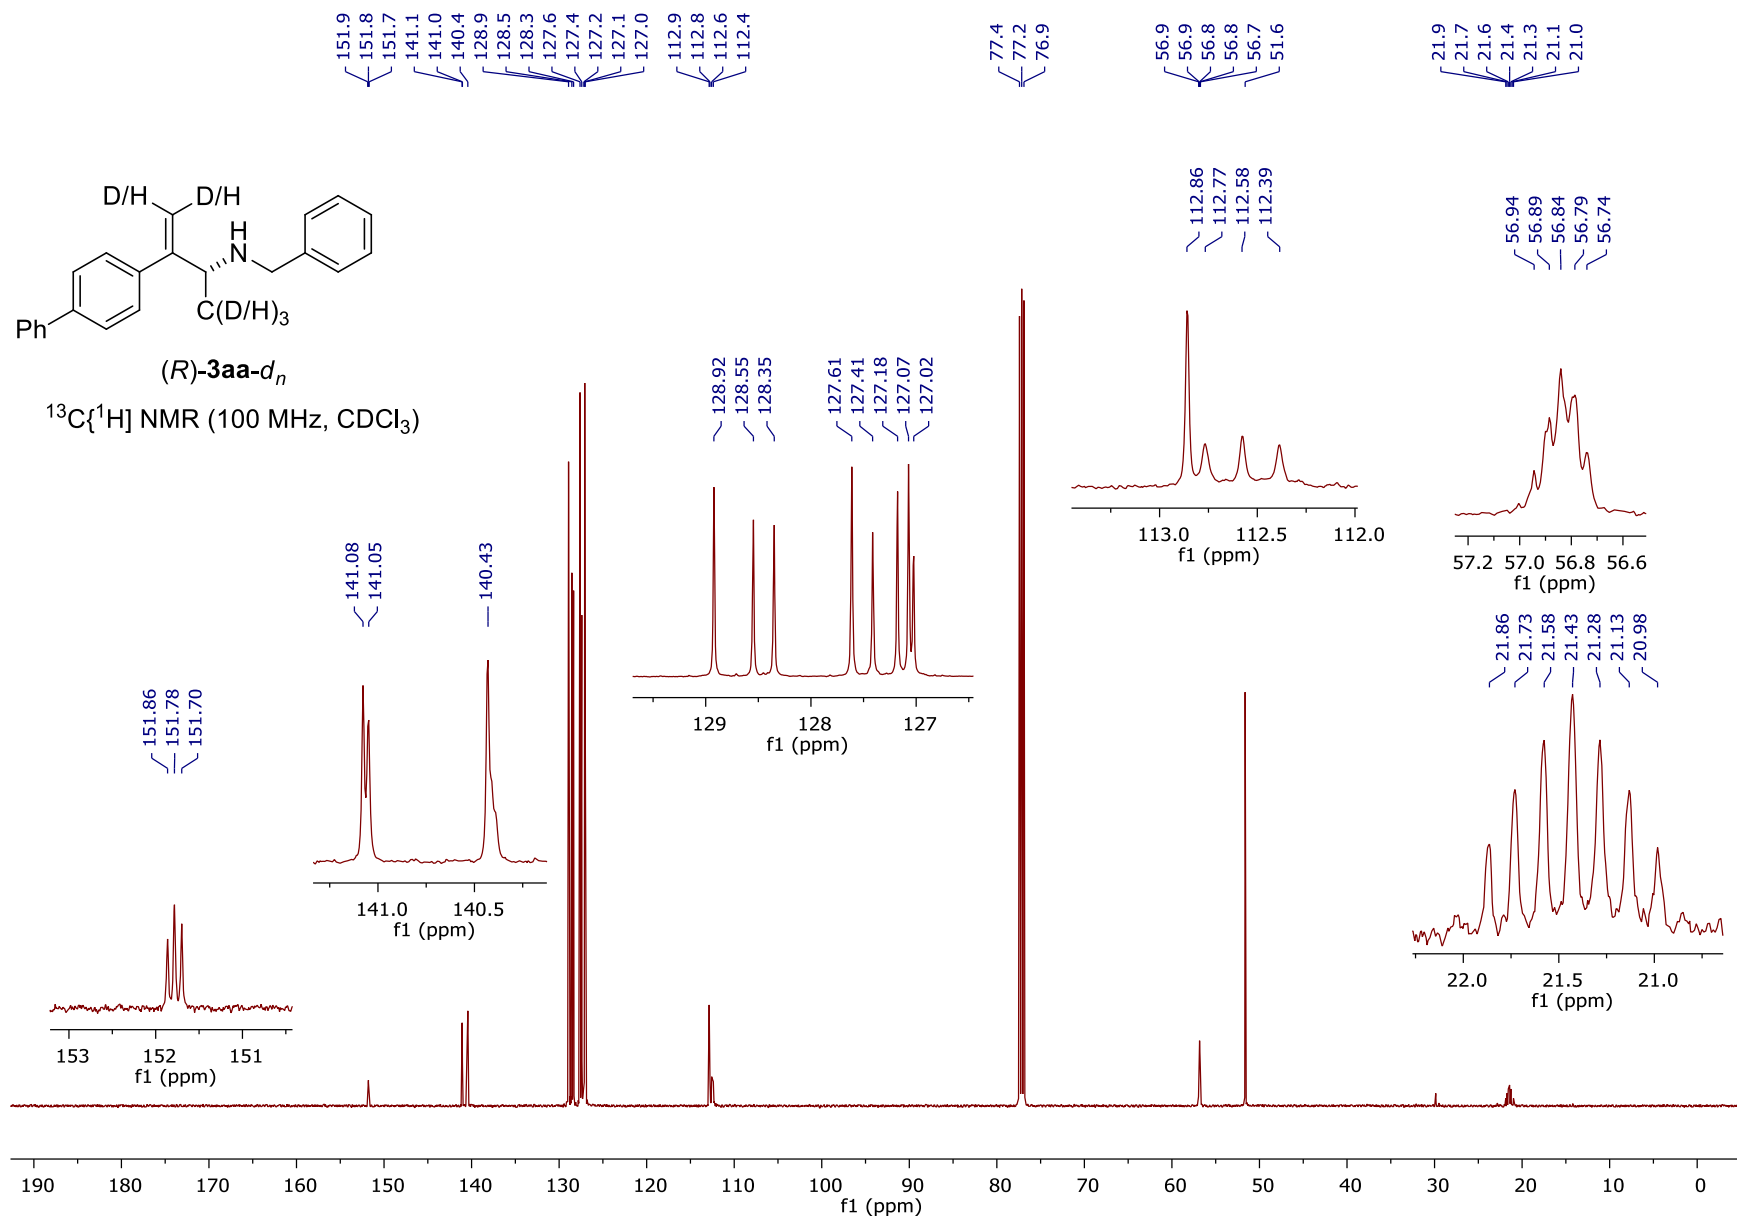

## 9.2. Post-reaction deuterium incorporation experiment

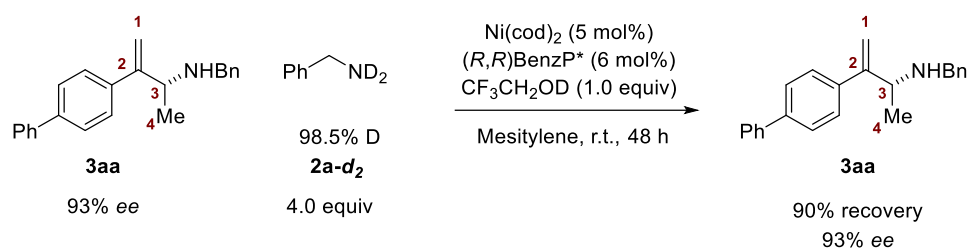

In a N<sub>2</sub>-filled glovebox, Ni(cod)<sub>2</sub> (1.4 mg, 0.005 mmol, 5 mol%) and (R,R)-BenzP\* **L**<sub>1</sub> (1.7 mg, 0.006 mmol, 6 mol%) were weighted in a 5 mL Schlenk tube, and anhydrous mesitylene (0.20 mL, 0.5 M) was added. After stirring at room temperature for 10 min, allylic amine **3aa** (31 mg, 0.10 mmol, 1.0 equiv, 93% ee), TFE-*d*<sub>1</sub> (10.0 mg, 0.10 mmol, 1.0 equiv, 99.5% D) and Bn-ND<sub>2</sub> (44.0 mg, 0.40 mmol, 4.0 equiv, 98.5% D) were added sequentially. The tube was sealed, taken out of the glovebox and stirred at room temperature for 48 h. The reaction mixture was filtered over a short pad of silica gel, washed with ethyl acetate (10 mL) and concentrated under vacuum to afford the crude mixture. Purification by flash chromatography over silica gel (pentane:EtOAc = 4:1) led to the desired product **3aa** as a pale yellow oil (28.0 mg, 90% recovery, 93% ee). <sup>1</sup>H NMR analysis did not show any trace of deuterium incorporation at any position.



### 9.3. Synthesis of 10-*d<sub>n</sub>* using TFE-*d*<sub>1</sub> - <sup>2</sup>H NMR monitoring

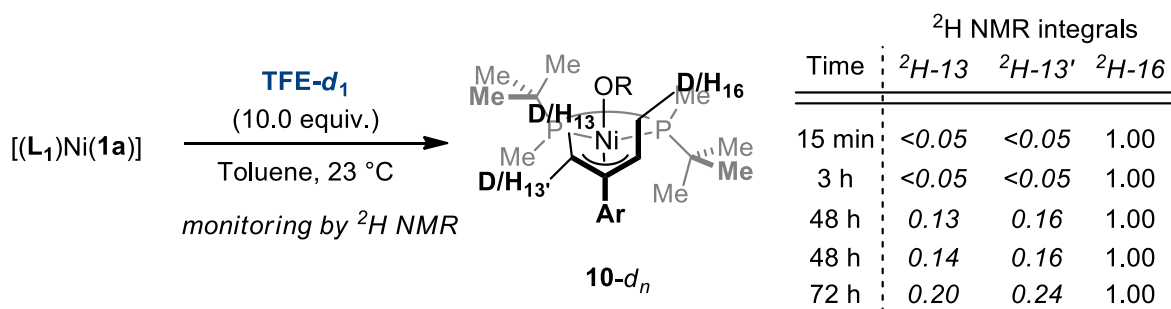

In a N<sub>2</sub>-filled glovebox, a 2 mL vial was charged with complex  $[(L_1)Ni(1a)]$  (**9**) (5.5 mg, 0.010 mmol, 1.0 equiv), followed by toluene (0.60 mL). To the resulting orange solution was added a 1.0 M solution of CF<sub>3</sub>CH<sub>2</sub>OD in toluene (0.10 mL, 0.10 mmol, 10.0 equiv). The color of the solution changed immediately to pale orange/yellow. 0.40 mL of this solution was introduced in a J-Young tube. <sup>2</sup>H NMR monitoring showed very rapid and selective deuterium incorporation at C-4 (D/H-16), and very slow deuterium incorporation at C-1 (D/H-13 and D/H-13').

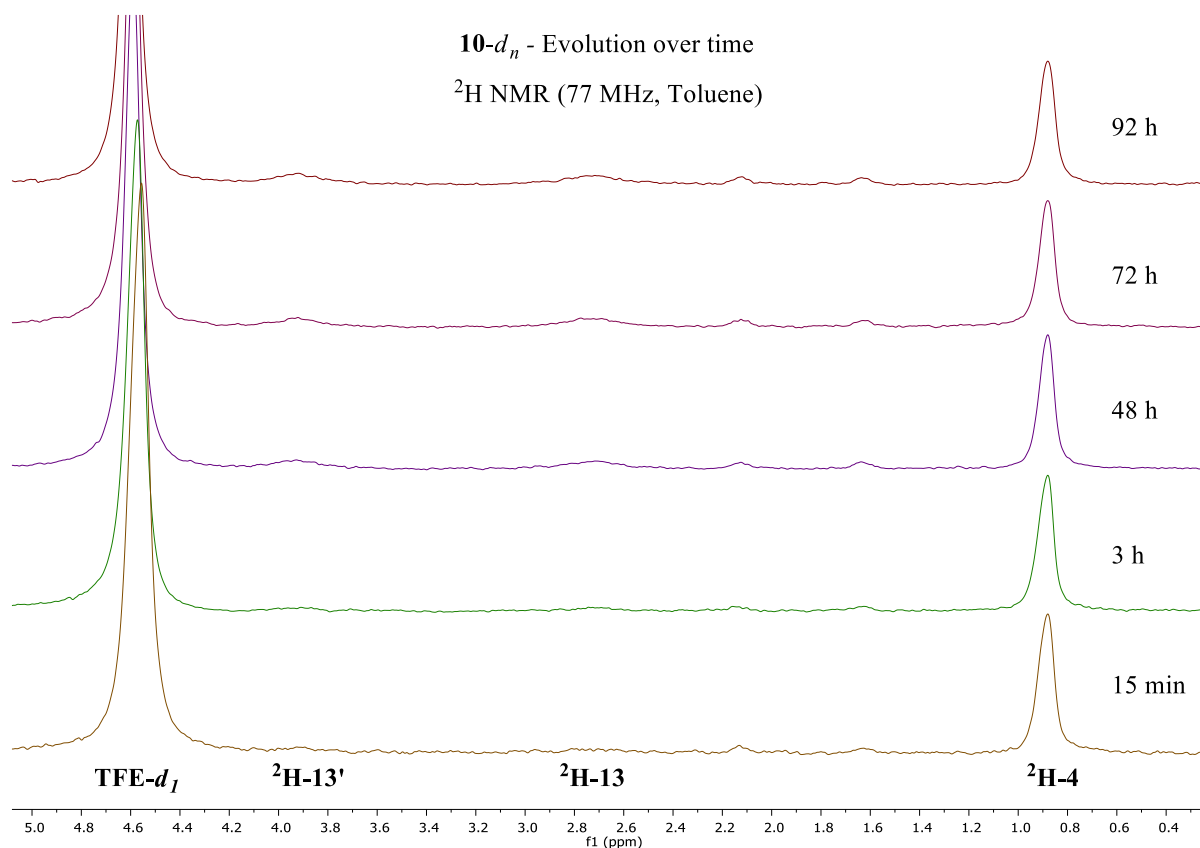

#### 9.4. Synthesis of 10-*d<sub>n</sub>* using TFE-*d*<sub>1</sub> and BnND<sub>2</sub>- <sup>1</sup>H NMR monitoring

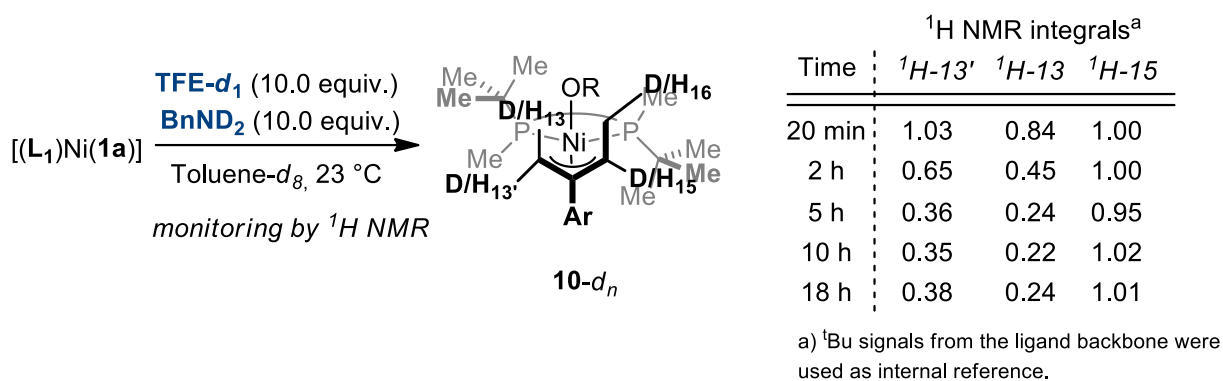

In a N<sub>2</sub>-filled glovebox, a 2 mL vial was charged with complex [(L<sub>1</sub>)Ni(1a)] (**9**) (16.6 mg, 0.030 mmol, 1.0 equiv), followed by toluene-*d*<sub>8</sub> (1.0 mL). To the resulting orange solution was added neat CF<sub>3</sub>CH<sub>2</sub>OD (31.0 mg, 0.303 mmol, 10.0 equiv). The color of the solution changed immediately to pale orange/yellow. 0.40 mL of this solution was introduced in a J-Young tube, followed by BnND<sub>2</sub> (13.0 mg, 0.120 mmol, 10.0 equiv). Deuterium integration at C-1 (D/H-13 and D/H-13') and C-3 (D/H-15) was then monitored by <sup>1</sup>H NMR. Deuterium integration at C-4 (D/H-16) could not be accomplished due to signals overlap.

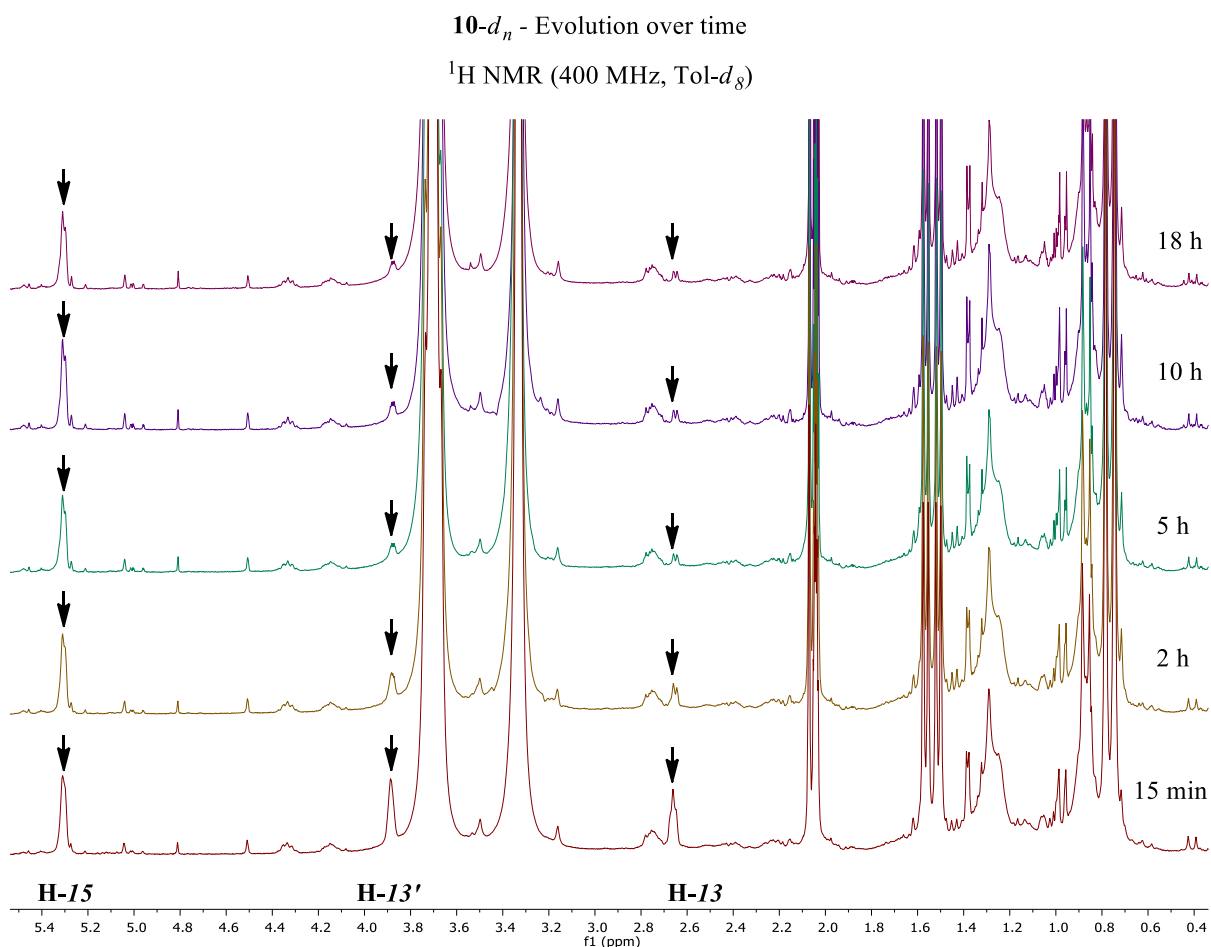

## 10. Kinetic studies

### General:

*In situ*  $^1\text{H}$  NMR monitoring was carried out in J-Young NMR tube using a AMX-500 Bruker Avance spectrometer. The reaction was monitored by following the consumption of substrate **1a** using the allylic proton at C-3. Spectra were collected at 298 K every 1 or 2 hours for the entirety of the experiment (5 scans, 10 seconds T1 relaxation delay). The data were treated using the methods for variable time normalization analysis.<sup>3</sup> Given the absence of by-products containing  $\text{BnNH}_2$ , the concentration of  $\text{BnNH}_2$  **[2a]**<sub>t</sub> for each time *t* was calculated using the following formula:  $[\mathbf{2a}]_t = [\mathbf{2a}]_{t=0} - ([\mathbf{1a}]_{t=0} - [\mathbf{1a}]_t)$ .

### Standard reaction procedure:

In an  $\text{N}_2$ -filled glove-box, a solution of  $\text{Ni}(\text{cod})_2$  (4.1 mg, 0.0150 mmol) and (R,R)BenzP\* **L**<sub>1</sub> (5.1 mg, 0.0181 mmol) in toluene-*d*<sub>8</sub> (0.60 mL) was prepared in a 2 mL vial. After stirring for 5 min, substrate **1a** (61.9 mg, 0.300 mmol) was added, stirring for continued for 30 min, and  $\text{BnNH}_2$  **2a** (128.6 mg, 131  $\mu\text{L}$ , 1.200 mmol) was added. In a J-Young tube equipped with a sealed glass capillary containing an internal standard solution (*p*-methylanisole  $\sim 0.10$  M;  $\text{PPh}_3 \sim 0.01$  M; solvent: toluene-*d*<sub>8</sub>) was introduced 0.49 mL of the resulting stock solution ( $[\text{Ni}(\text{cod})_2] = 0.0205$  M;  $[\mathbf{L}_1] = 0.0248$  M;  $[\mathbf{1a}] = 0.410$  M;  $[\mathbf{2a}] = 1.641$  M).  $^1\text{H}$  NMR of this solution was acquired, allowing for calibration of the  $^1\text{H}$  internal standard peaks (time = 0 s). The J-Young tube was then brought back into an  $\text{N}_2$ -filled glovebox, catalysis was initiated by addition of trifluoroethanol (20.0 mg, 0.200 mmol, 1.0 equiv,  $[\text{TFE}] = 0.410$  M), and the reaction mixture was monitored over time by  $^1\text{H}$  NMR.

### Same excess

This reaction was carried out according to the standard reaction procedure, with the following concentrations:  $[\text{Ni}(\text{cod})_2] = 0.0205$  M;  $[\mathbf{L}_1] = 0.0248$  M;  $[\mathbf{1a}] = 0.250$  M;  $[\mathbf{2a}] = 1.500$  M;  $[\text{TFE}] = 0.410$  M).

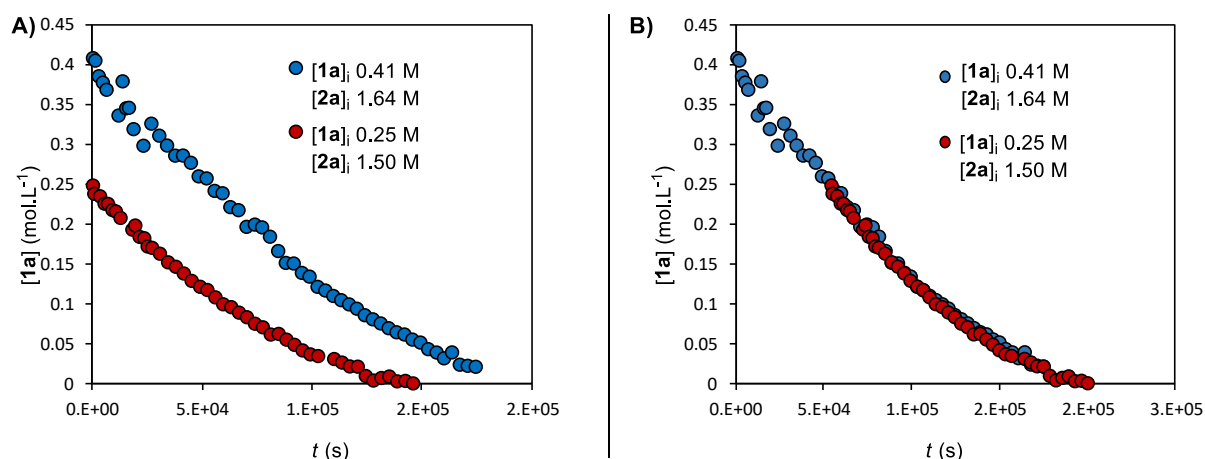

**Figure S3.** A) Reaction time course for "standard conditions" (blue points) and "same excess" experiment (red points). B) Reaction time course for standard and same excess experiments after time adjustment of the "same excess" experiment (red points;  $\Delta t = +53550$  s).

### Order in catalyst

This reaction was carried out according to the standard reaction procedure, with the following concentrations:  $[Ni(cod)_2] = 0.0410$  M;  $[L_1] = 0.0496$  M;  $[1a] = 0.410$  M;  $[2a] = 1.641$  M;  $[TFE] = 0.410$  M).

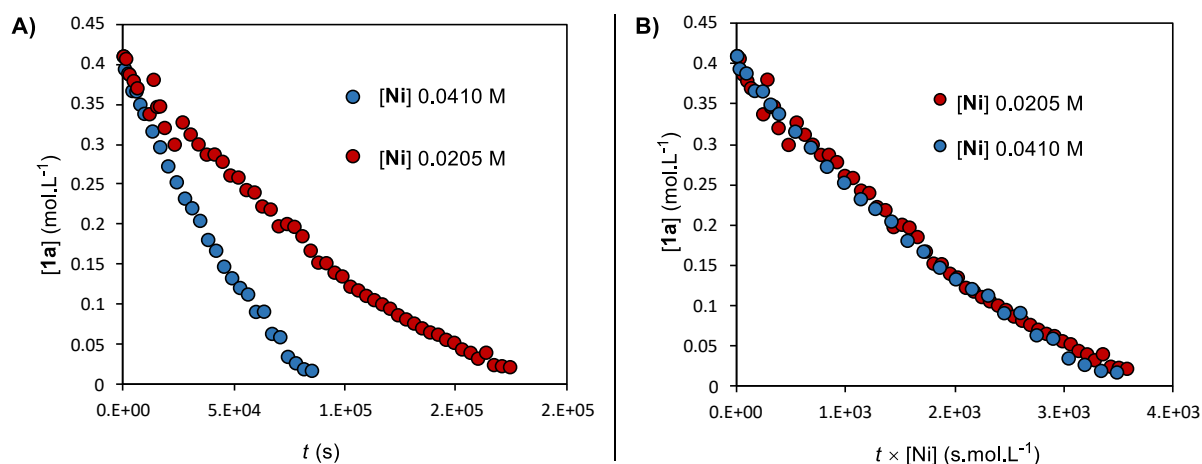

**Figure S-4.** A) Reaction time course for "standard conditions" (red points) and "Order in catalyst" experiment (blue points). B) Reaction time course for standard and "Order in catalyst" experiments after multiplication of the original time axis by the catalyst initial concentration ( $t \times [Ni(cod)_2]$ ).

## Order in diene **1a**

This reaction was carried out according to the standard reaction procedure, with the following concentrations:  $[\text{Ni}(\text{cod})_2] = 0.0205 \text{ M}$ ;  $[\text{L}_1] = 0.0248 \text{ M}$ ;  $[\mathbf{1a}] = 0.615 \text{ M}$ ;  $[\mathbf{2a}] = 1.641 \text{ M}$ ;  $[\text{TFE}] = 0.410 \text{ M}$ ).

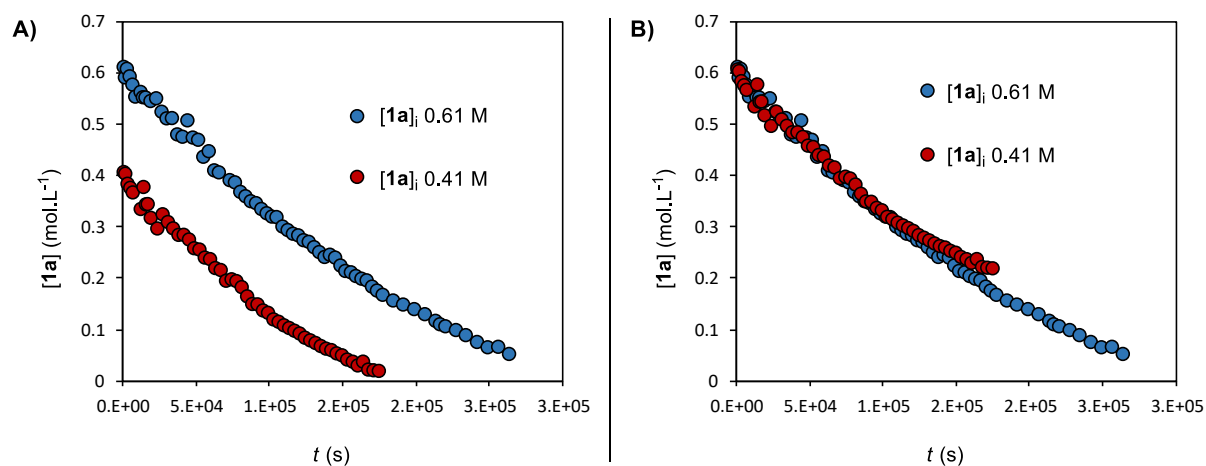

**Figure S-5.** A) Reaction time course for "standard conditions" (red points) and "Order in diene" experiment (blue points). B) Reaction time course for standard and "Order in diene" experiments after upward concentration shift of the "standard conditions" points (red points:  $[\mathbf{1a}] + 0.205 \text{ M}$ ).

## Order in TFE

These reactions were carried out according to the standard reaction procedure, with the following concentrations:

- Red points:  $[\text{Ni}(\text{cod})_2] = 0.0205 \text{ M}$ ;  $[\text{L}_1] = 0.0248 \text{ M}$ ;  $[\mathbf{1a}] = 0.410 \text{ M}$ ;  $[\mathbf{2a}] = 1.641 \text{ M}$ ;  $[\text{TFE}] = 0.290 \text{ M}$ .
- Yellow points:  $[\text{Ni}(\text{cod})_2] = 0.0205 \text{ M}$ ;  $[\text{L}_1] = 0.0248 \text{ M}$ ;  $[\mathbf{1a}] = 0.410 \text{ M}$ ;  $[\mathbf{2a}] = 1.641 \text{ M}$ ;  $[\text{TFE}] = 0.530 \text{ M}$ .

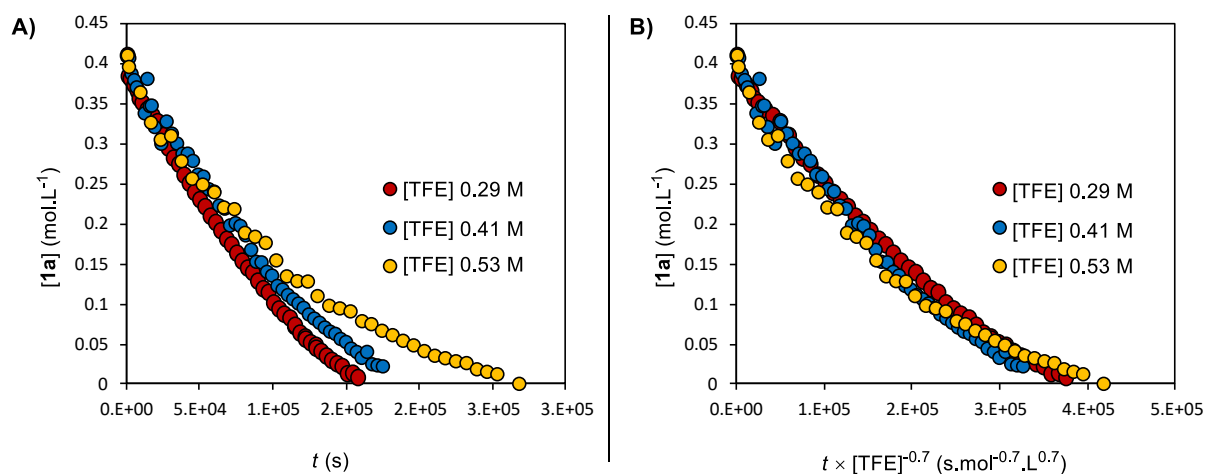

**Figure S-6.** A) Reaction time course for "standard conditions" (red points) and "Order in TFE" experiments (blue and yellow points). B) Reaction time course for standard and "Order in TFE" experiments after multiplication of the original time axis by  $[TFE]^{-0.7}$  (time  $\times [TFE]^{-0.7}$ ).

### Order in BnNH<sub>2</sub> 2a

These reactions were carried out according to the standard reaction procedure, with the following concentrations:

- Red points:  $[Ni(cod)_2] = 0.0205$  M;  $[L_1] = 0.0248$  M;  $[1a] = 0.410$  M;  $[2a] = 1.290$  M;  $[TFE] = 0.410$  M).
- Yellow points:  $[Ni(cod)_2] = 0.0205$  M;  $[L_1] = 0.0248$  M;  $[1a] = 0.410$  M;  $[2a] = 1.961$  M;  $[TFE] = 0.410$  M).

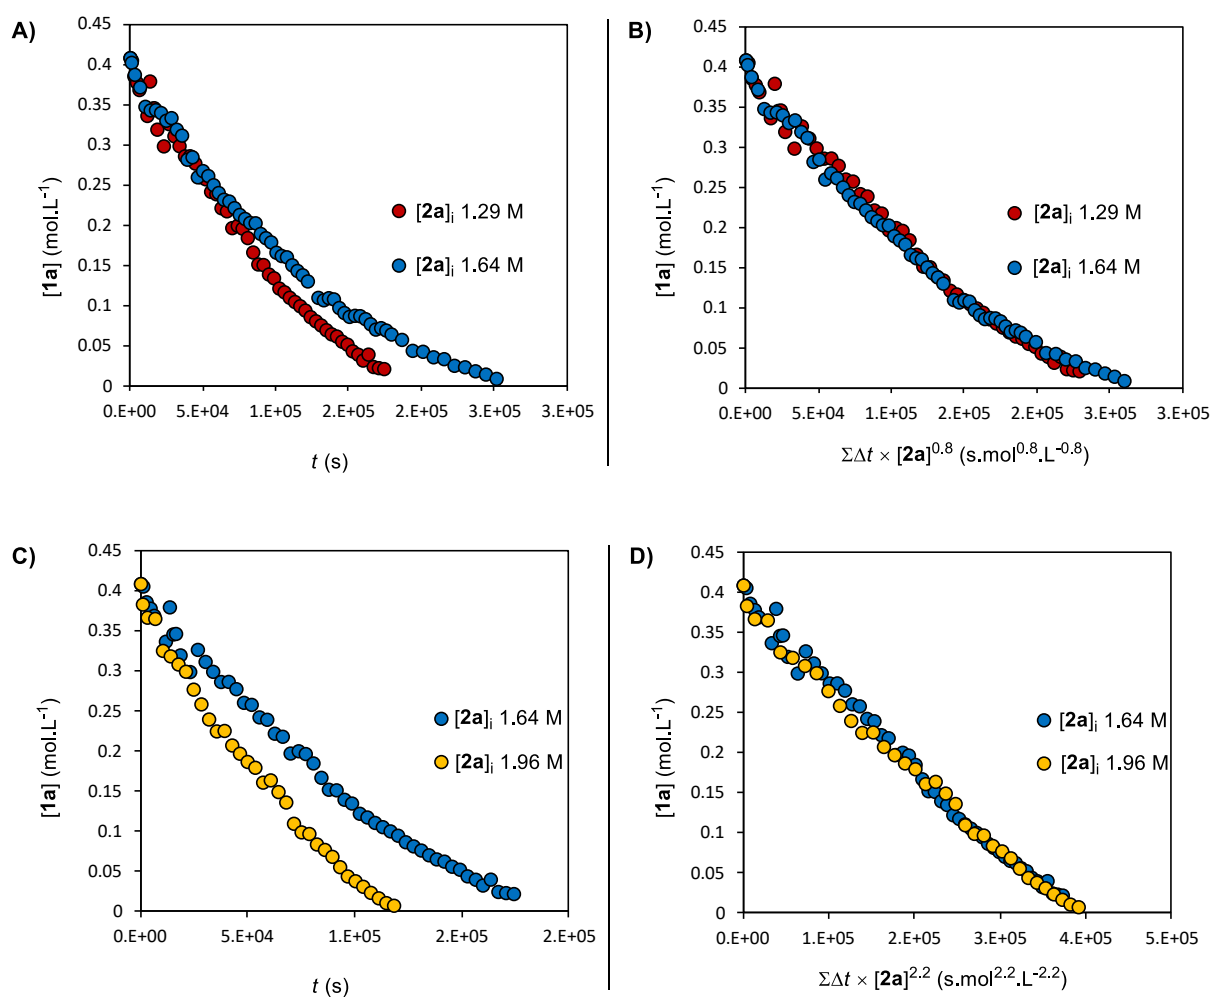

**Figure S-7.** A) and C) Reaction time course for standard conditions (blue points) and "Order in BnNH<sub>2</sub> **2a**" experiments (red and yellow points). B) Reaction time course for standard and "Order in BnNH<sub>2</sub> (1.29 M)" experiments after variable time normalization of the original time axis using  $t_n = \sum_{i=1}^n (t_i - t_{i-1}) \left( \frac{[2a]_i + [2a]_{i-1}}{2} \right)^{0.8}$ . D) Reaction time course for standard and "Order in BnNH<sub>2</sub> **2a** (1.96 M)" experiments after variable time normalization of the original time axis using  $t_n = \sum_{i=1}^n (t_i - t_{i-1}) \left( \frac{[2a]_i + [2a]_{i-1}}{2} \right)^{2.2}$ .

## 11. BnNH<sub>2</sub> NMR titration by TFE

In an N<sub>2</sub>-filled glove-box, BnNH<sub>2</sub> (86 mg, 88  $\mu$ L, 0.80 mmol) and toluene-*d*<sub>8</sub> (0.40 mL) were charged in a J-Young NMR tube equipped with a sealed glass capillary containing an internal standard solution (*p*-methylanisole  $\sim$  0.010 M; solvent: toluene-*d*<sub>8</sub>). <sup>1</sup>H NMR of this solution was recorded, the J-Young tube was brought back into the glovebox. Increasing amounts of trifluoroethanol were then added sequentially, and <sup>1</sup>H NMR spectra were recorded between each point (Figure S-8).

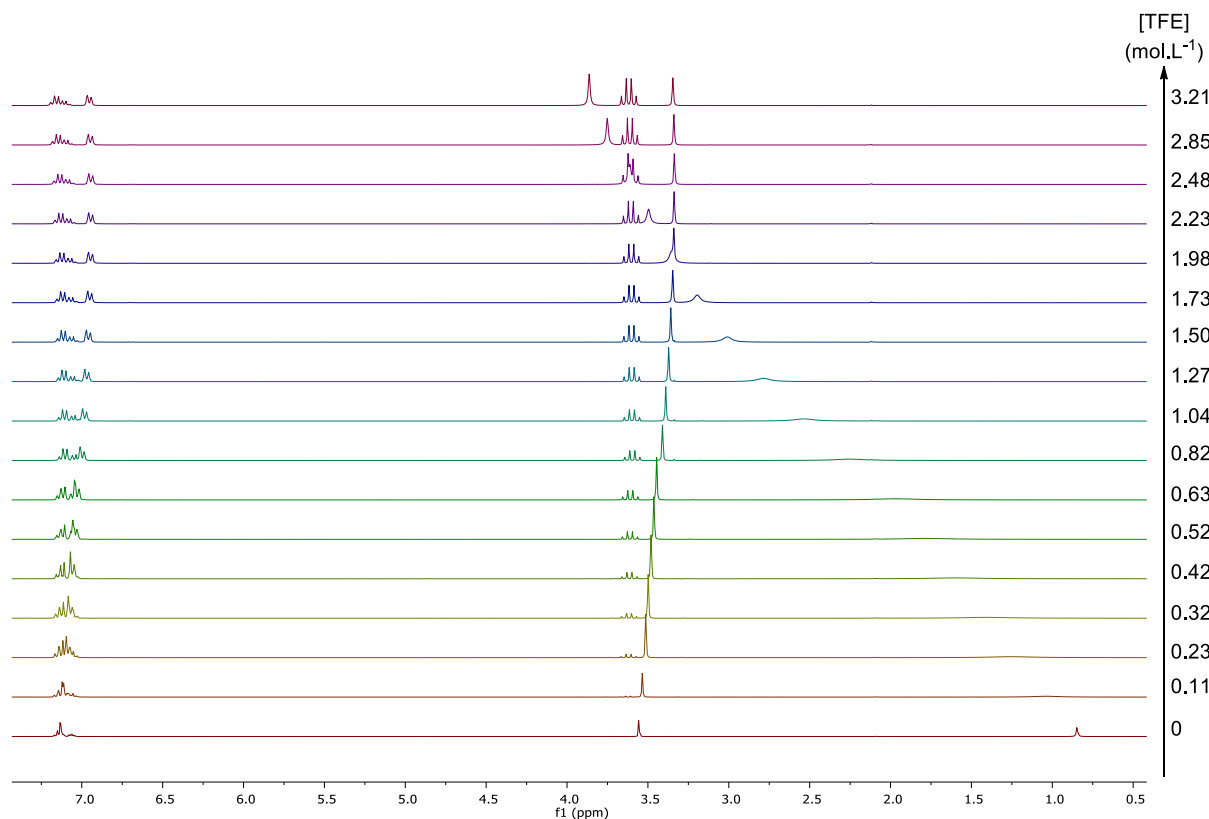

**Figure S-8.** <sup>1</sup>H NMR of [BnNH<sub>2</sub>:TFE] solutions in toluene-*d*<sub>8</sub>.

The  $\Delta\delta$  <sup>1</sup>H NMR shift of the BnNH<sub>2</sub> benzylic protons for each point compared to the initial 1.64 M BnNH<sub>2</sub> solution was then plotted against the TFE concentration (Figure S-9).

These data were fitted to the 1:1, 2:1 or 1:2 binding models proposed by Thodarson *et al.*<sup>4</sup> Good Root Means Square errors were obtained for the 1:2 and 2:1 BnNH<sub>2</sub>:TFE models (RMS = 0.0028 and 0.0024 respectively). Although it is not possible to unequivocally determine which one of these fits is better, a 1:2 fit - where a BnNH<sub>2</sub>:TFE dimer would form first prior to binding of a second equivalent of TFE to the lone pair of the oxygen of the first molecule of alcohol - seems more likely. Indeed, the signal of the benzylic hydrogens are no longer significantly shifting once the concentration in TFE and BnNH<sub>2</sub> are equals.



Subsequently, the signal of the exchangeable protons of benzylamine sharpen until a 1:2 stoichiometry is reached.

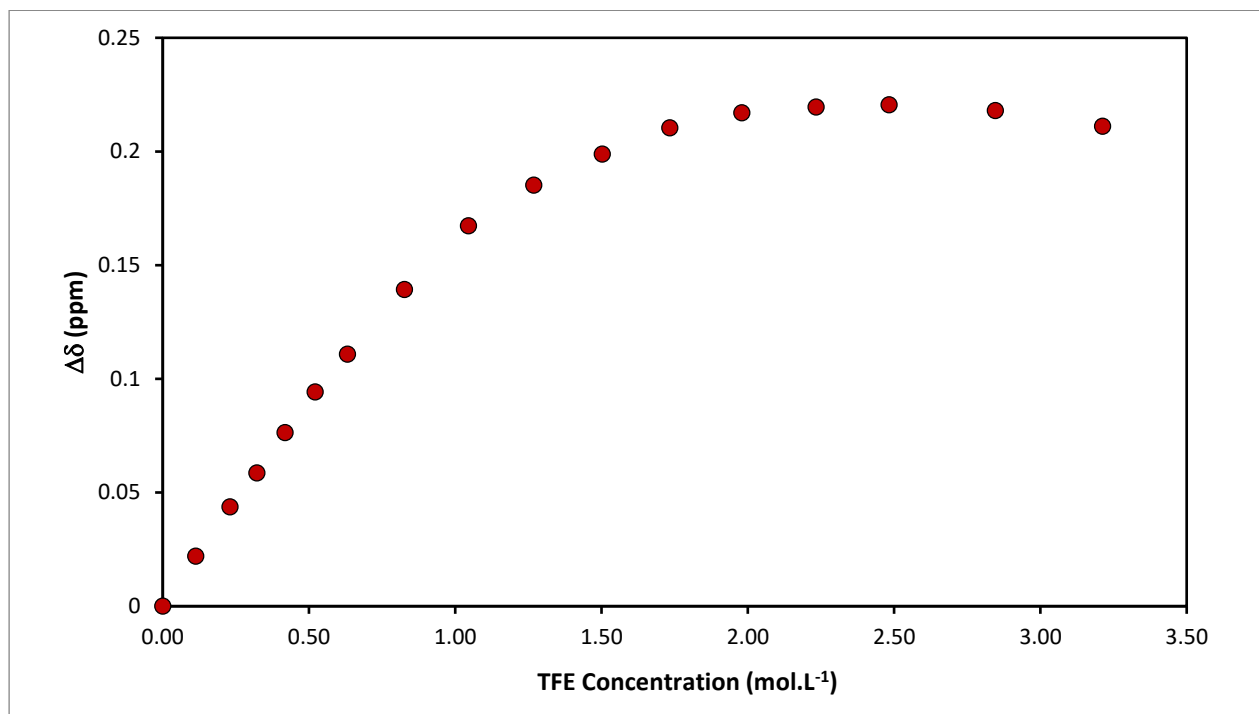

**Figure S-9.** <sup>1</sup>H NMR titration of Benzylic amine by CF<sub>3</sub>CH<sub>2</sub>OH.

## 12. NMR Spectra of organic compounds

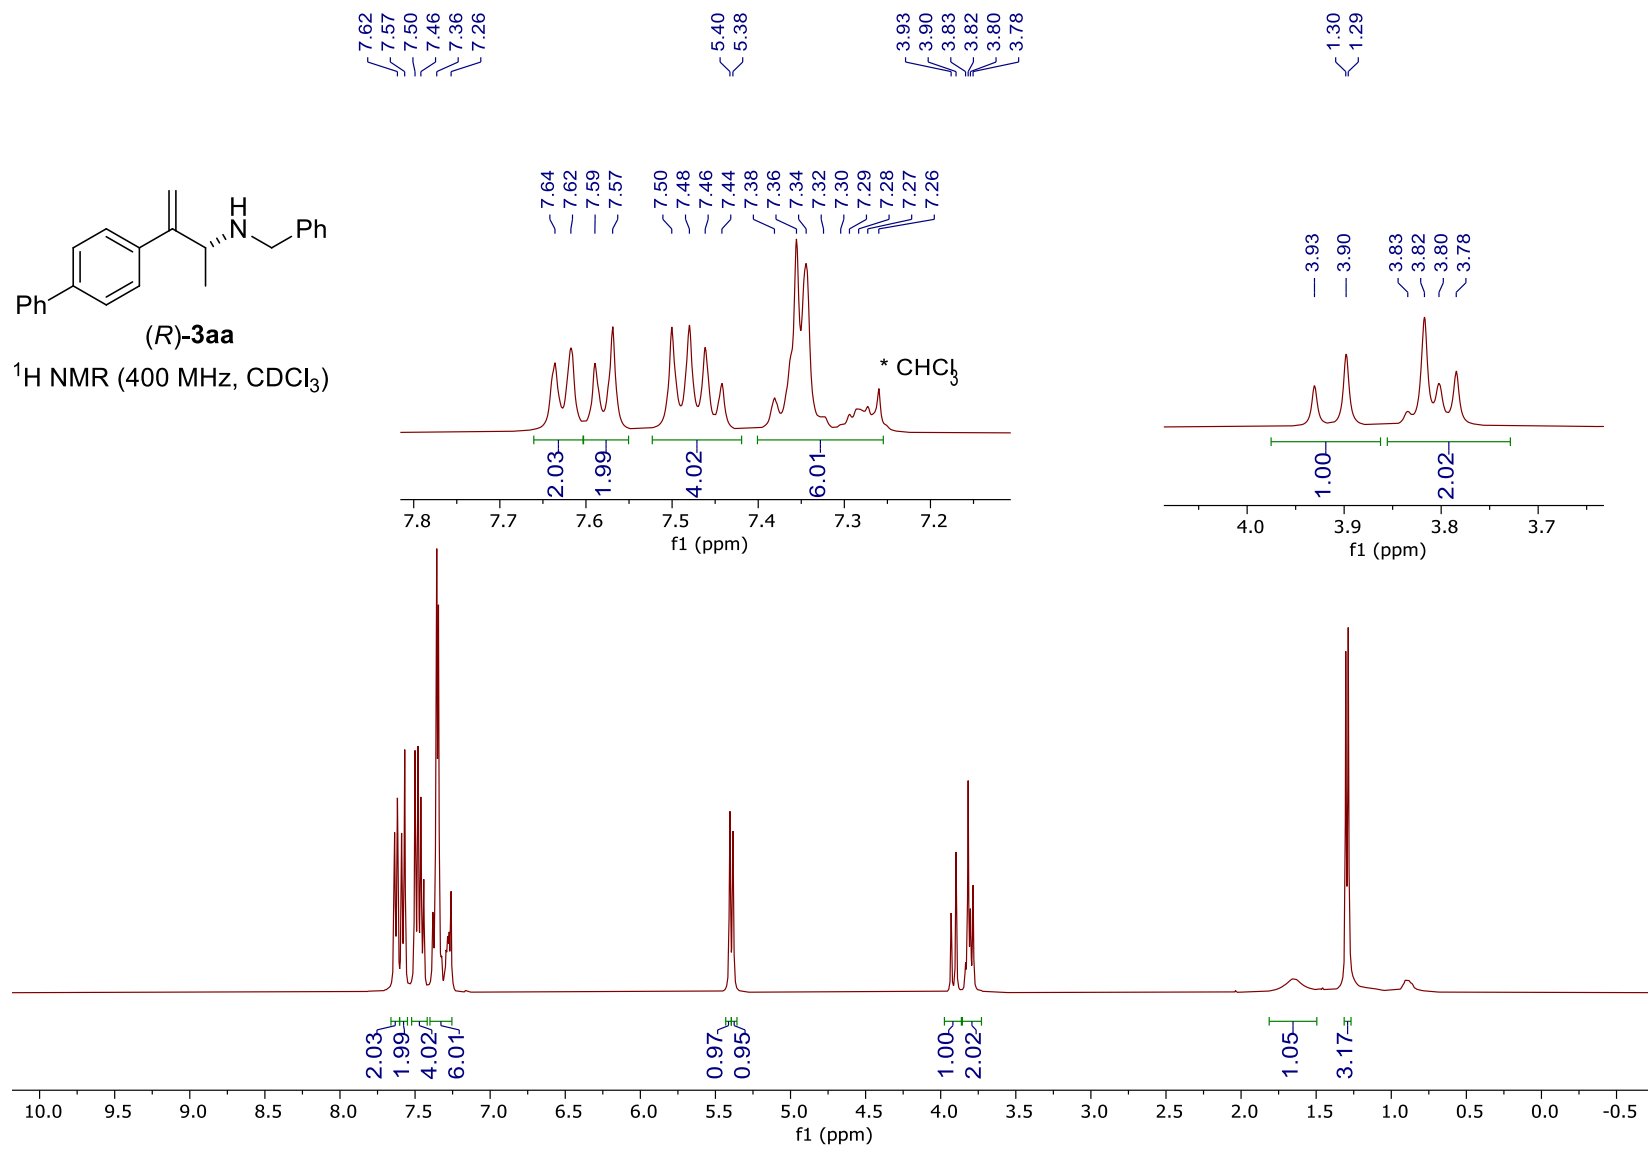

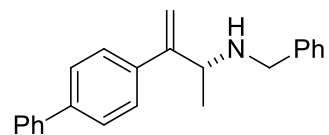

(R)-3aa

$^{13}\text{C}\{^1\text{H}\}$  NMR (100 MHz,  $\text{CDCl}_3$ )

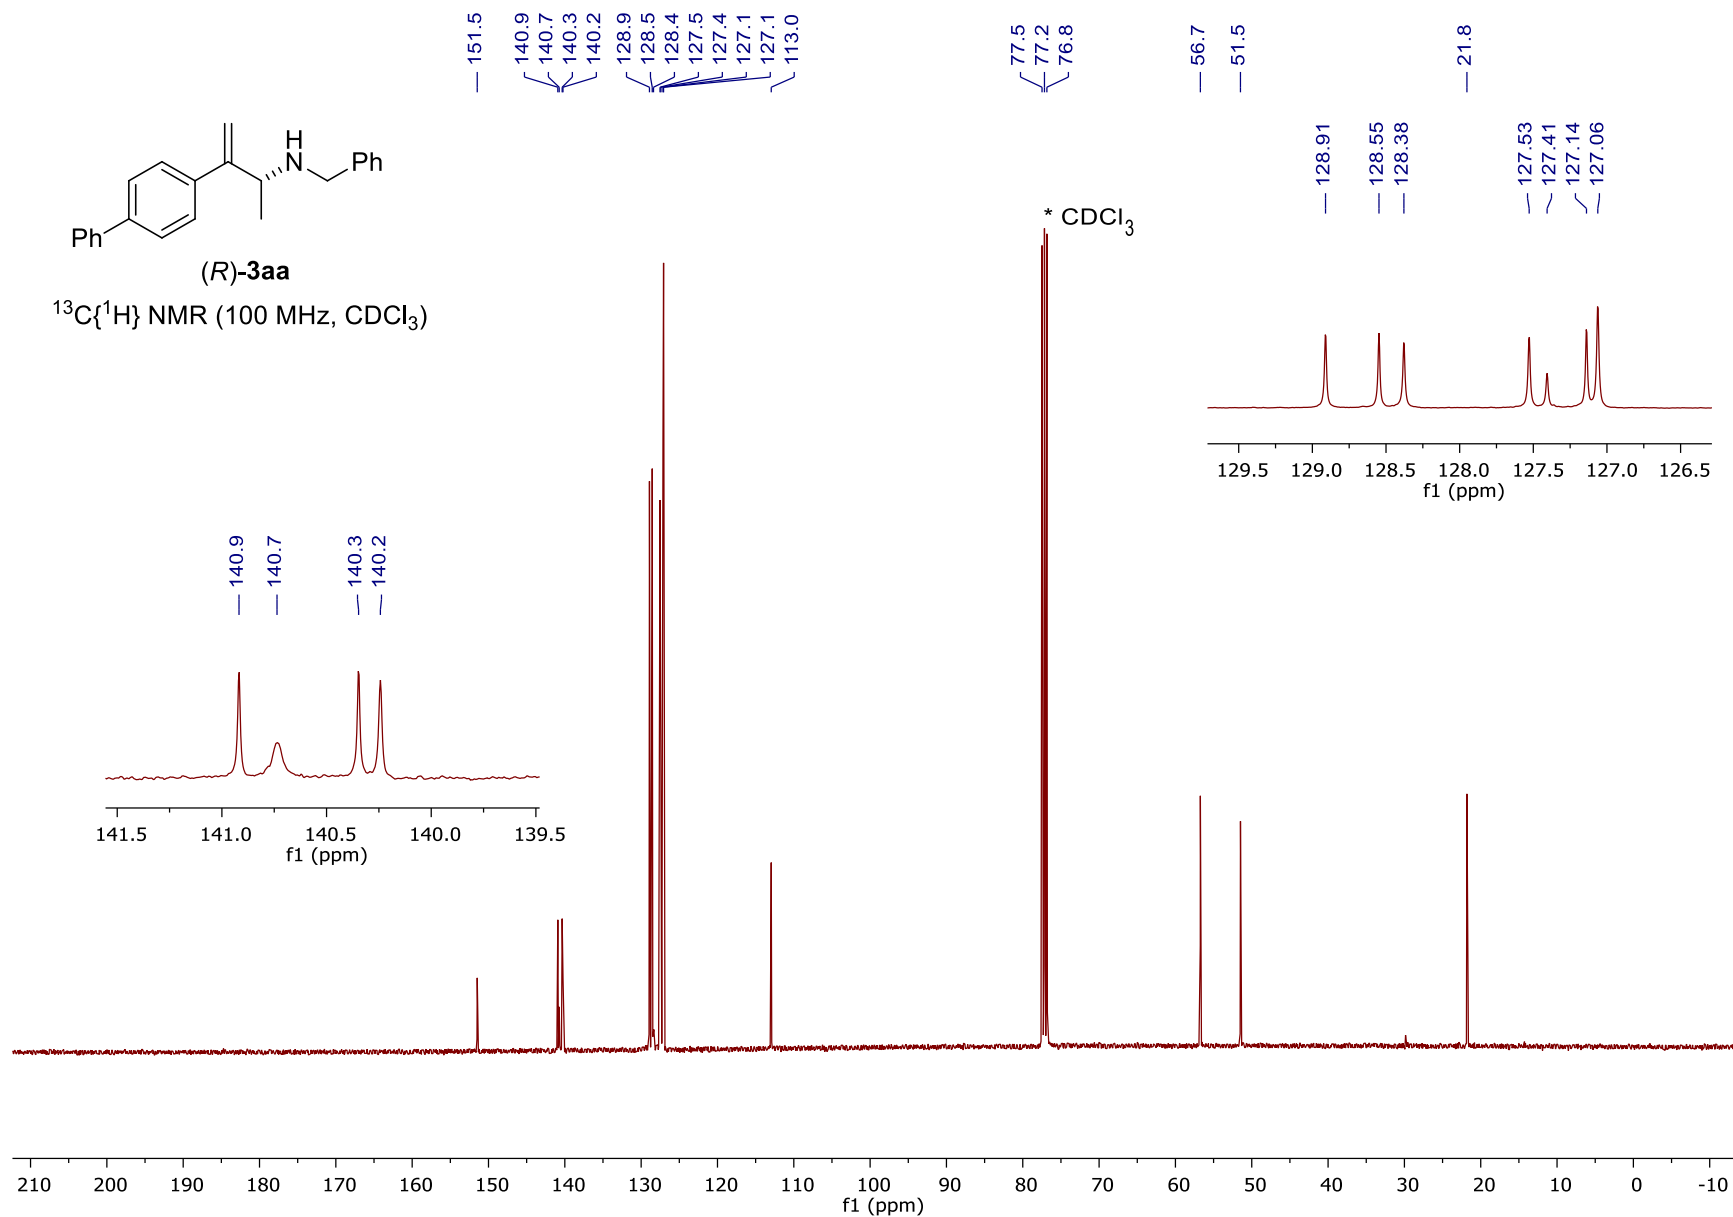

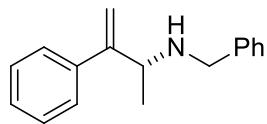

(*R*)-**3ba**

$^1\text{H}$  NMR (400 MHz,  $\text{CDCl}_3$ )

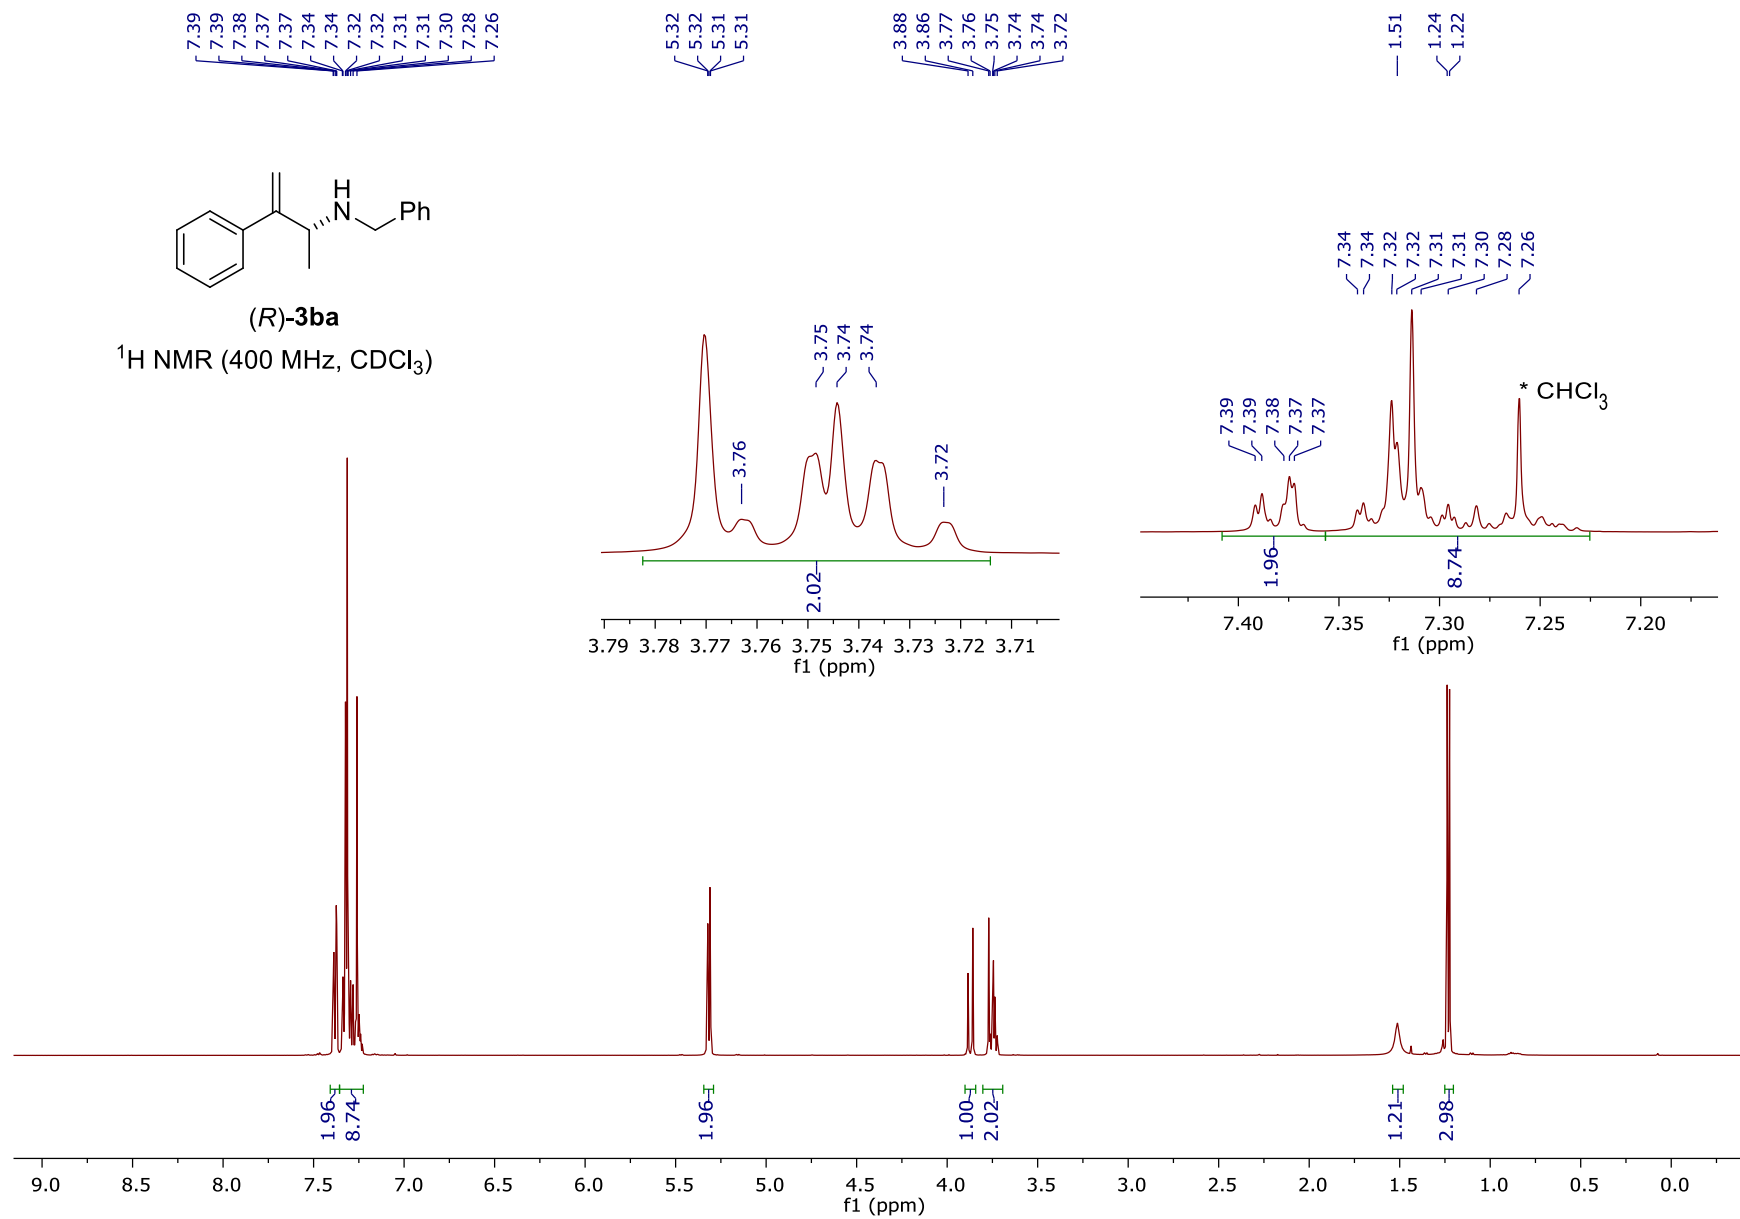

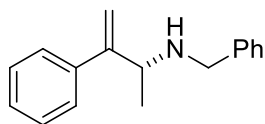

**(R)-3ba**

$^{13}\text{C}\{^1\text{H}\}$  NMR (100 MHz,  $\text{CDCl}_3$ )

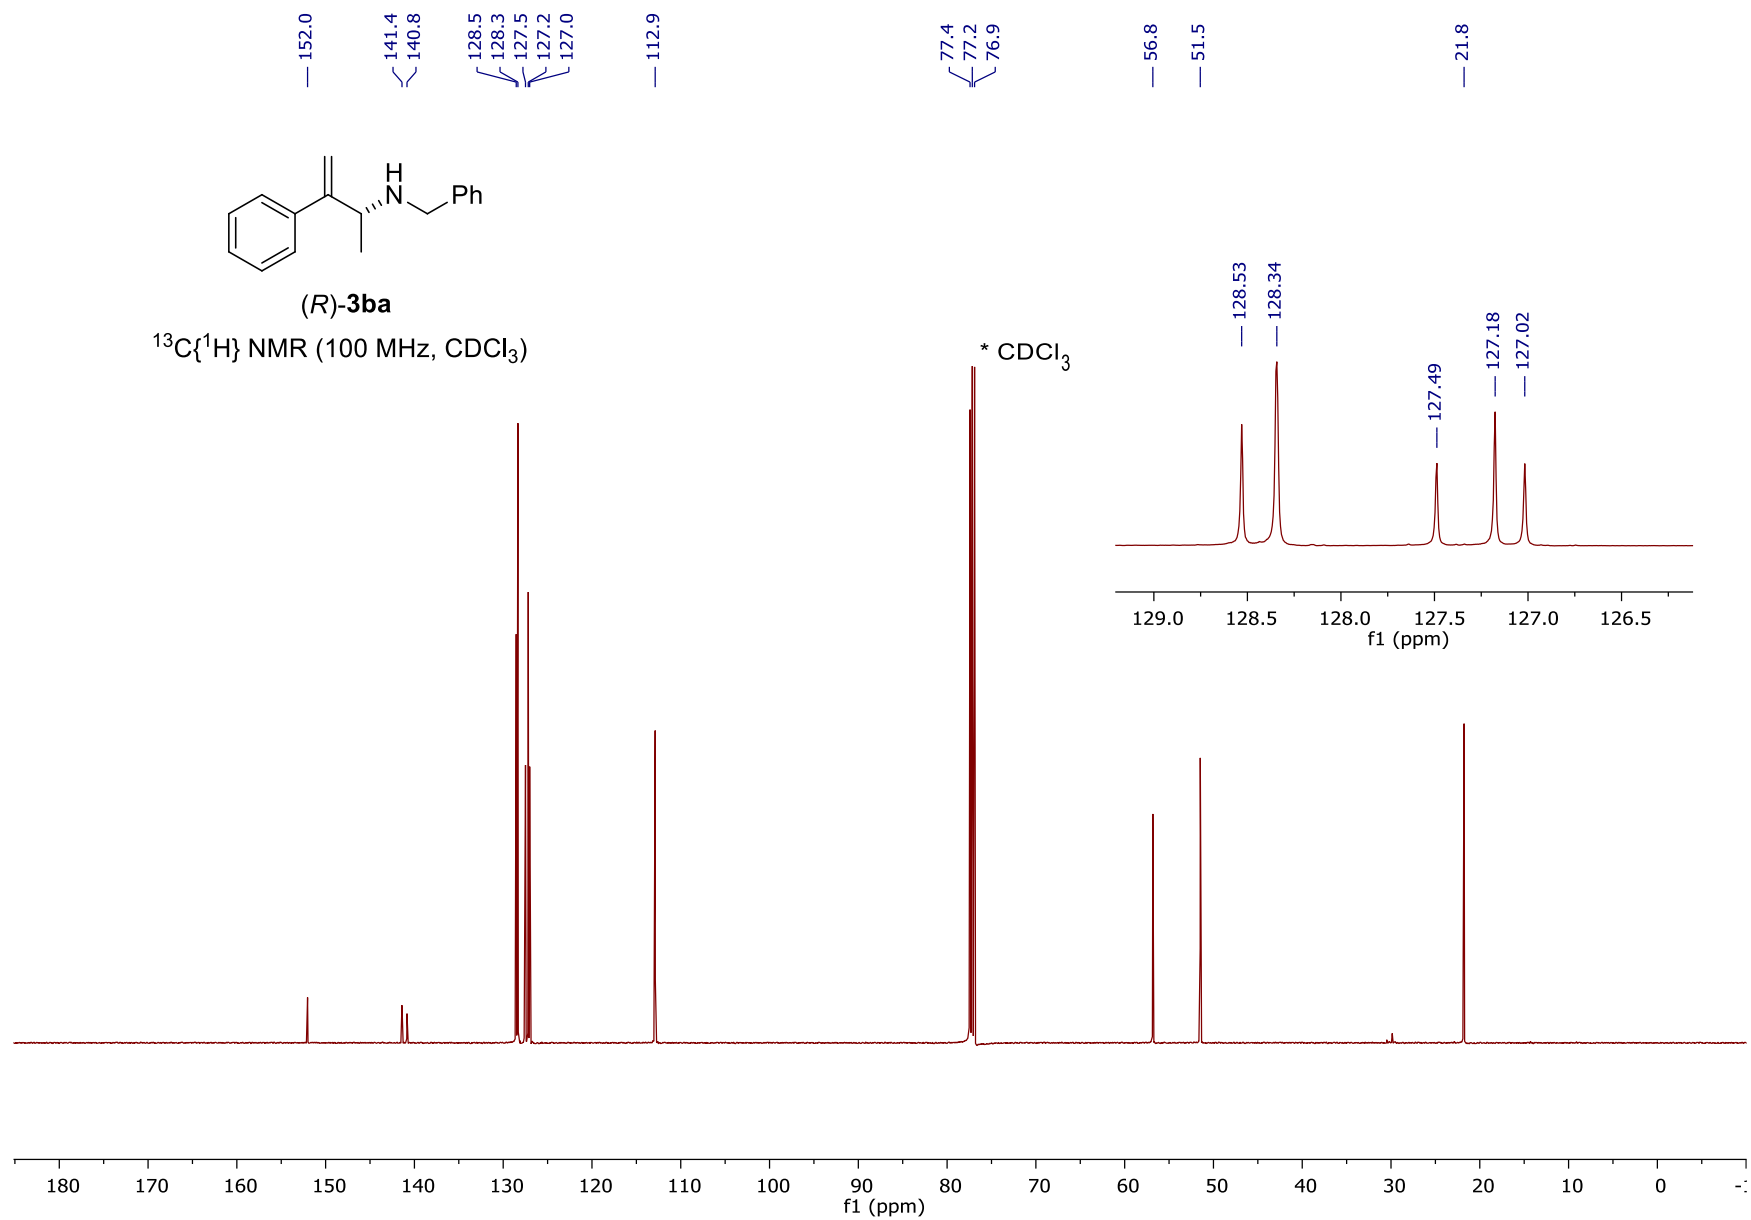

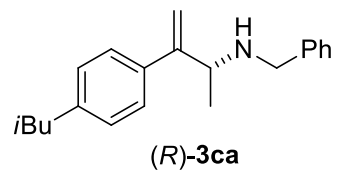

<sup>1</sup>H NMR (400 MHz, CDCl<sub>3</sub>)

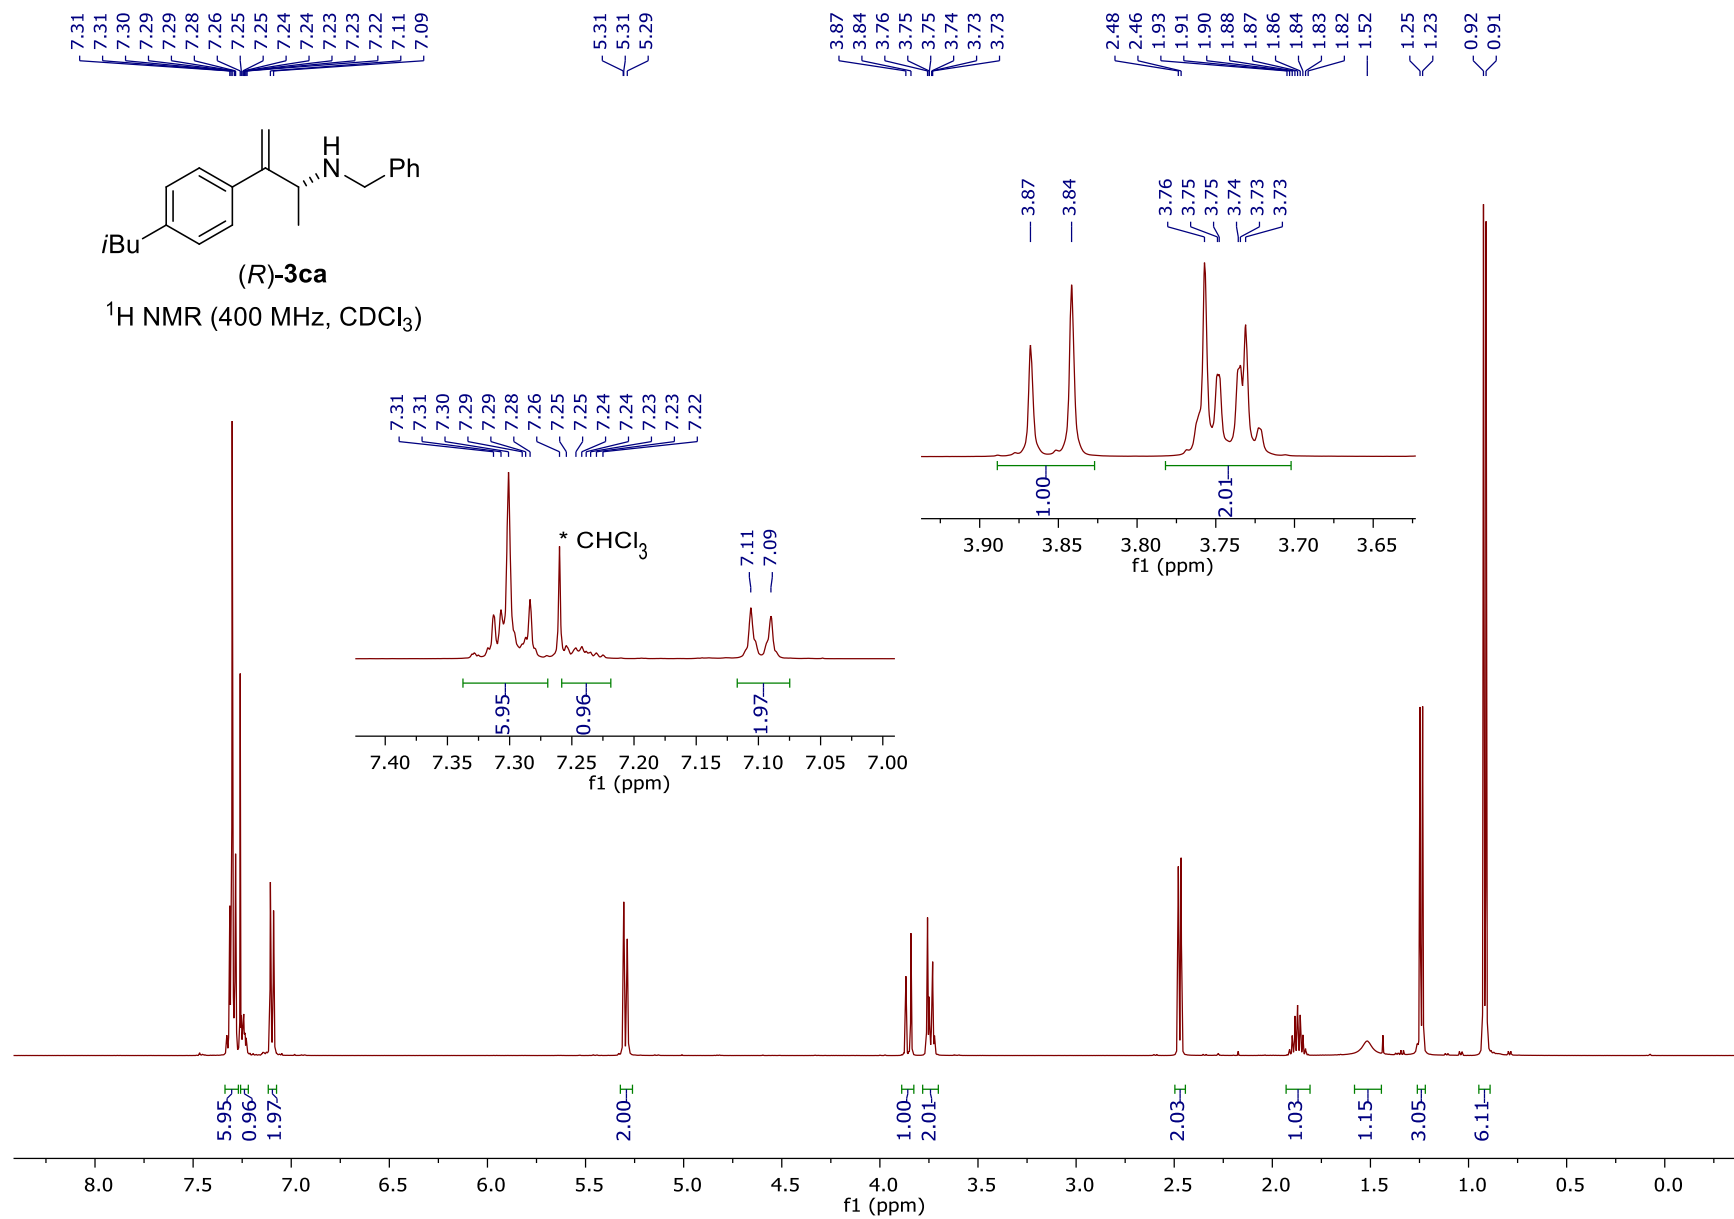

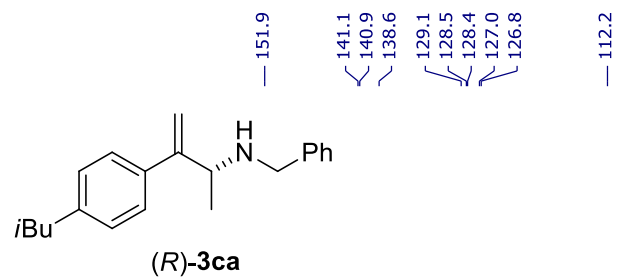

$^{13}\text{C}\{^1\text{H}\}$  NMR (100 MHz,  $\text{CDCl}_3$ )

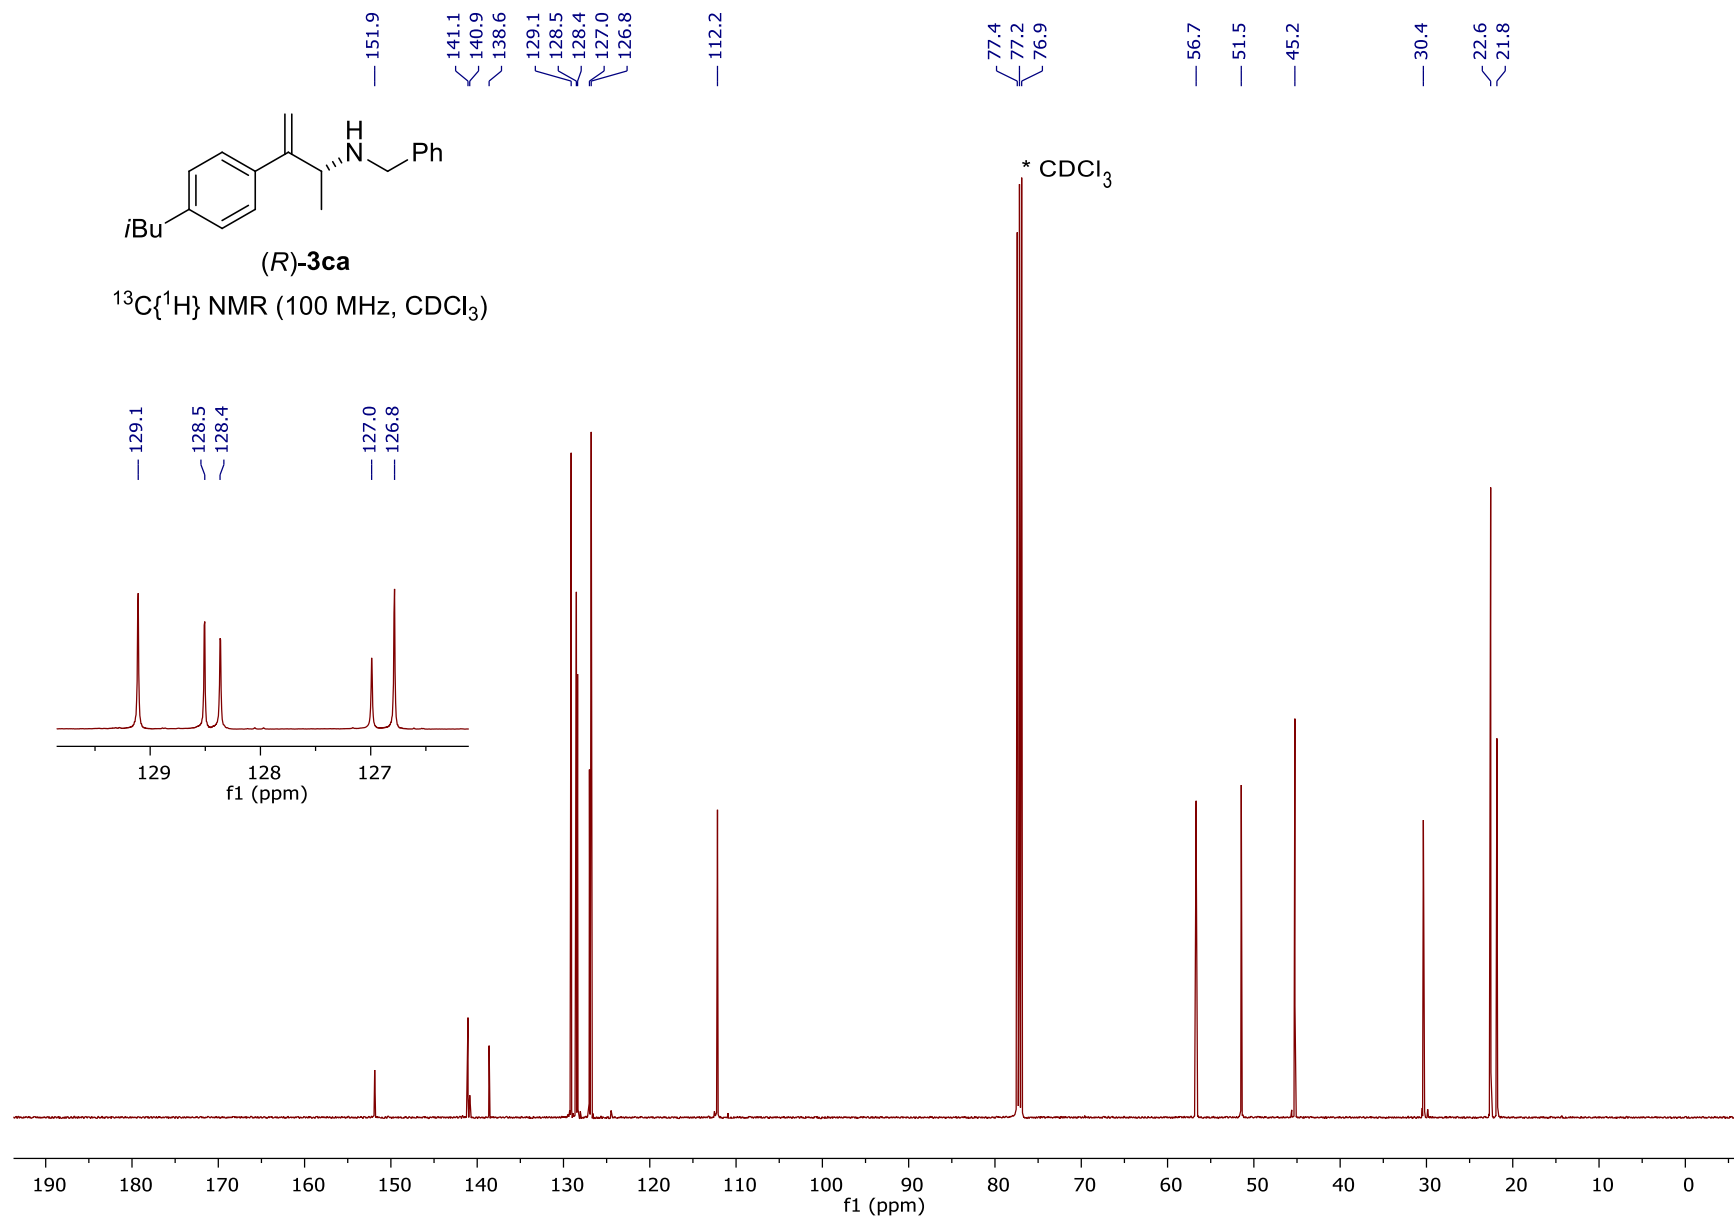



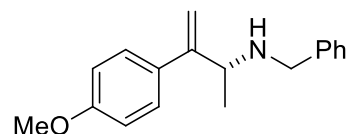

(R)-3da

<sup>1</sup>H NMR (500 MHz, CDCl<sub>3</sub>)

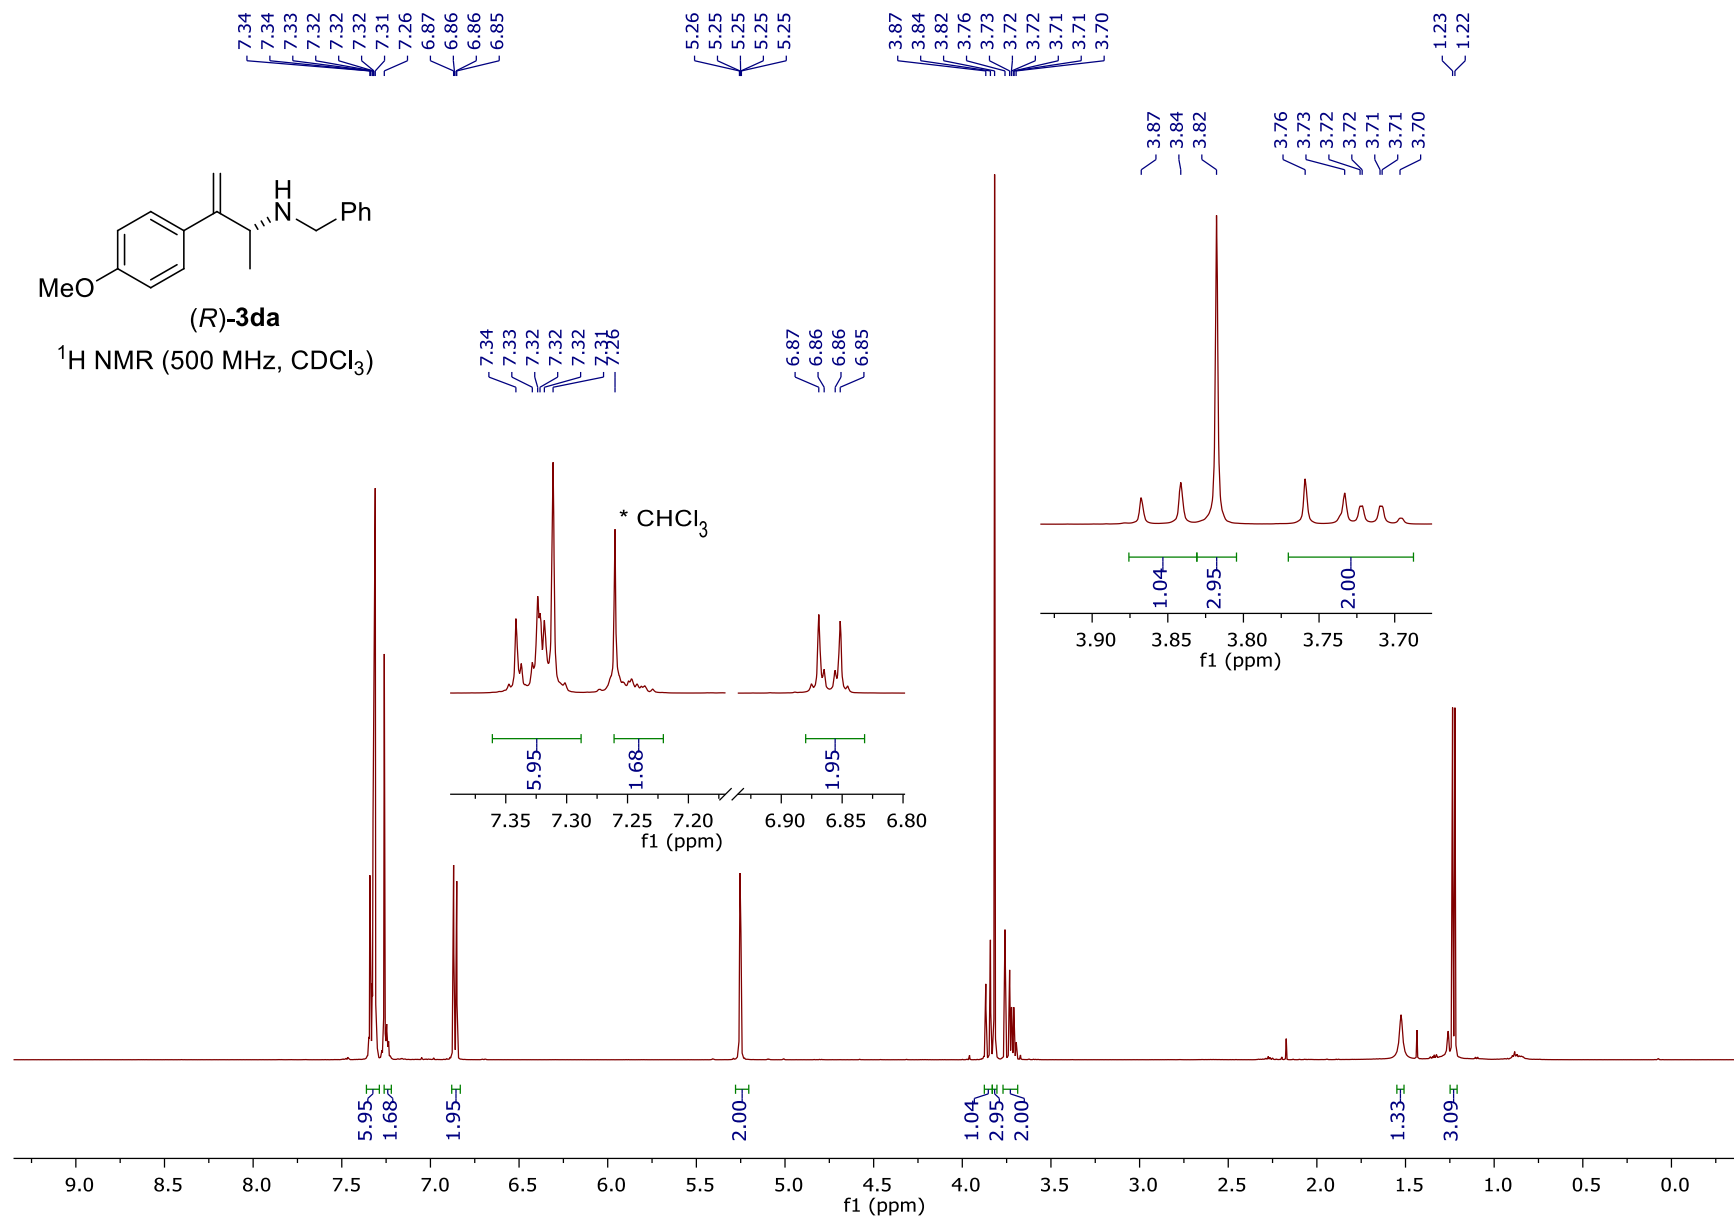

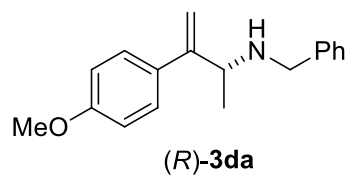

$^{13}\text{C}\{^1\text{H}\}$  NMR (130 MHz,  $\text{CDCl}_3$ )

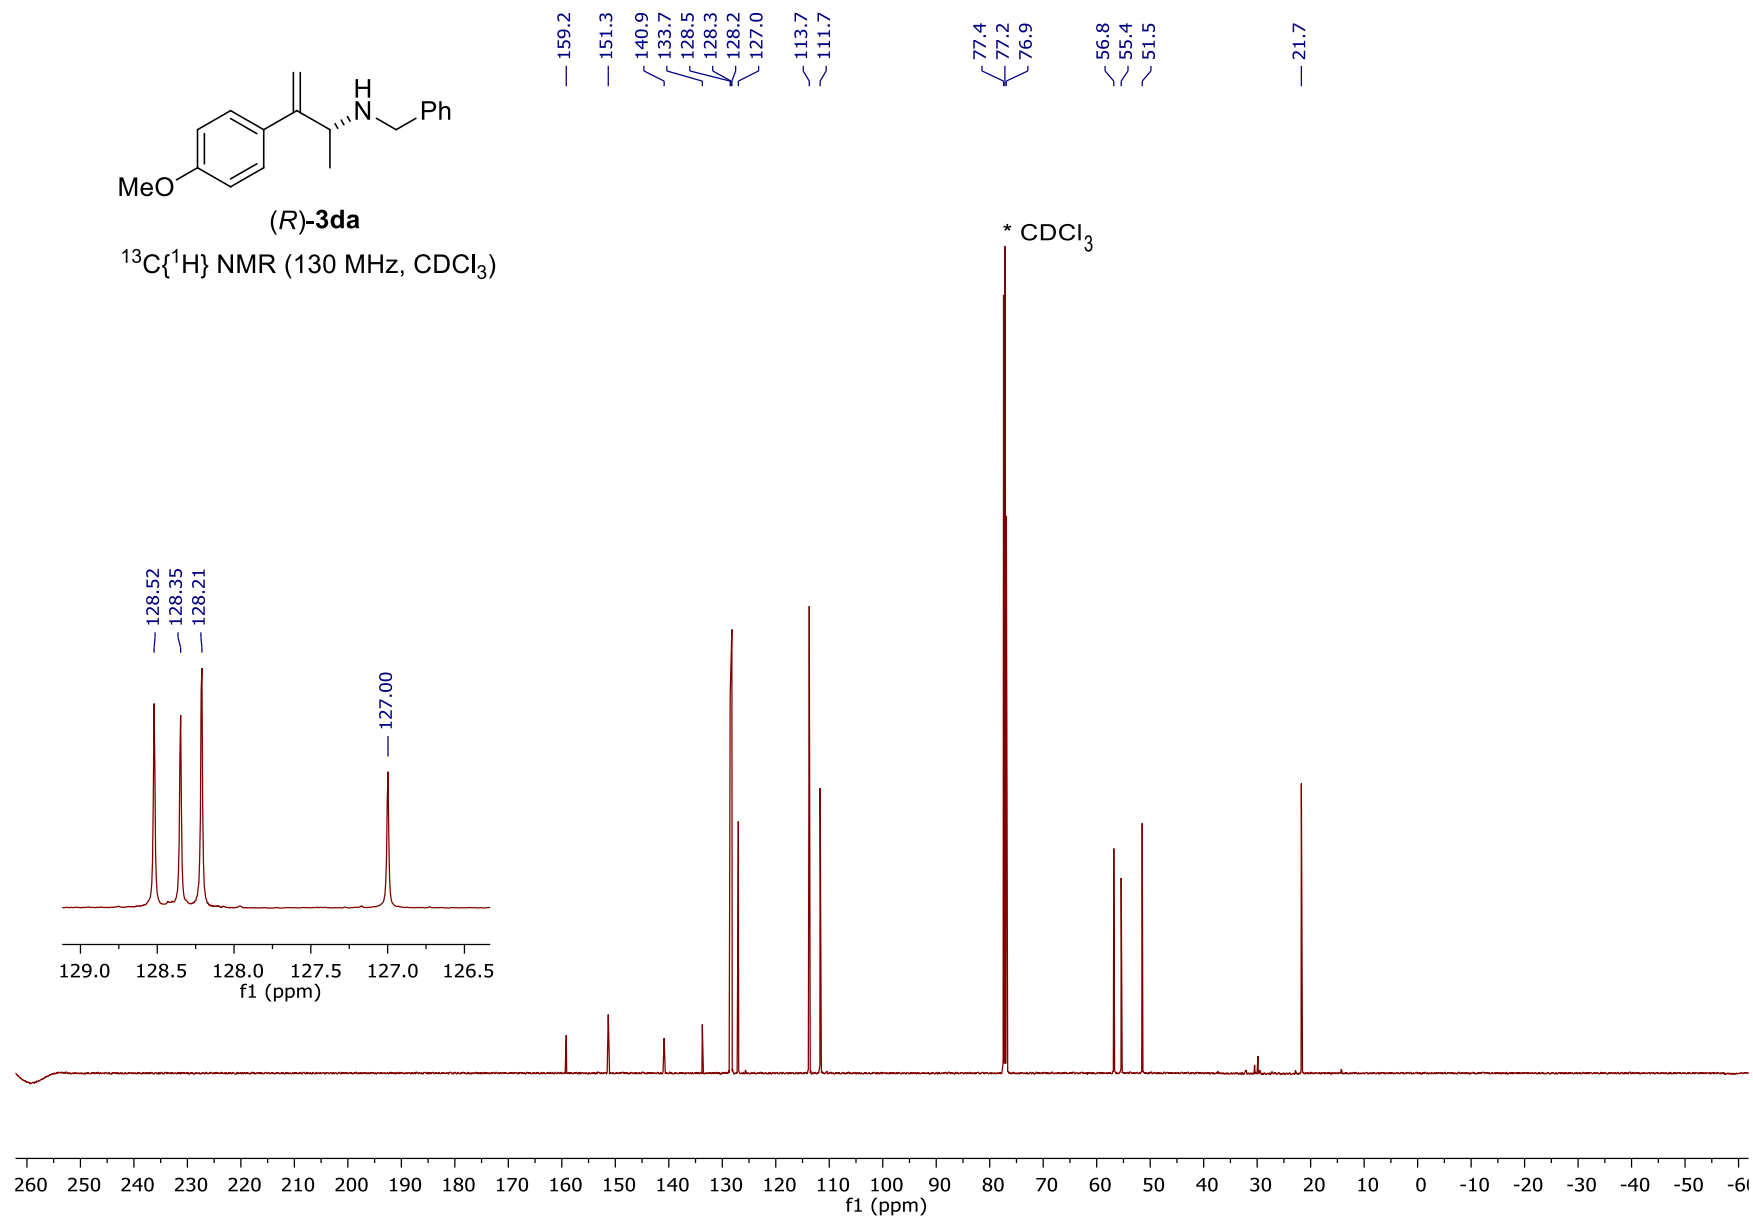

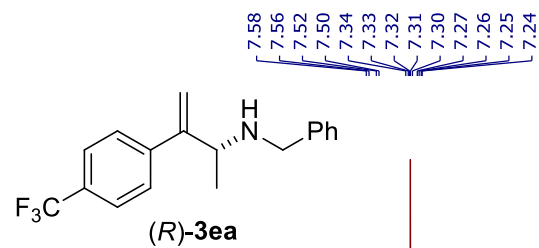

$^1\text{H}$  NMR (500 MHz,  $\text{CDCl}_3$ )

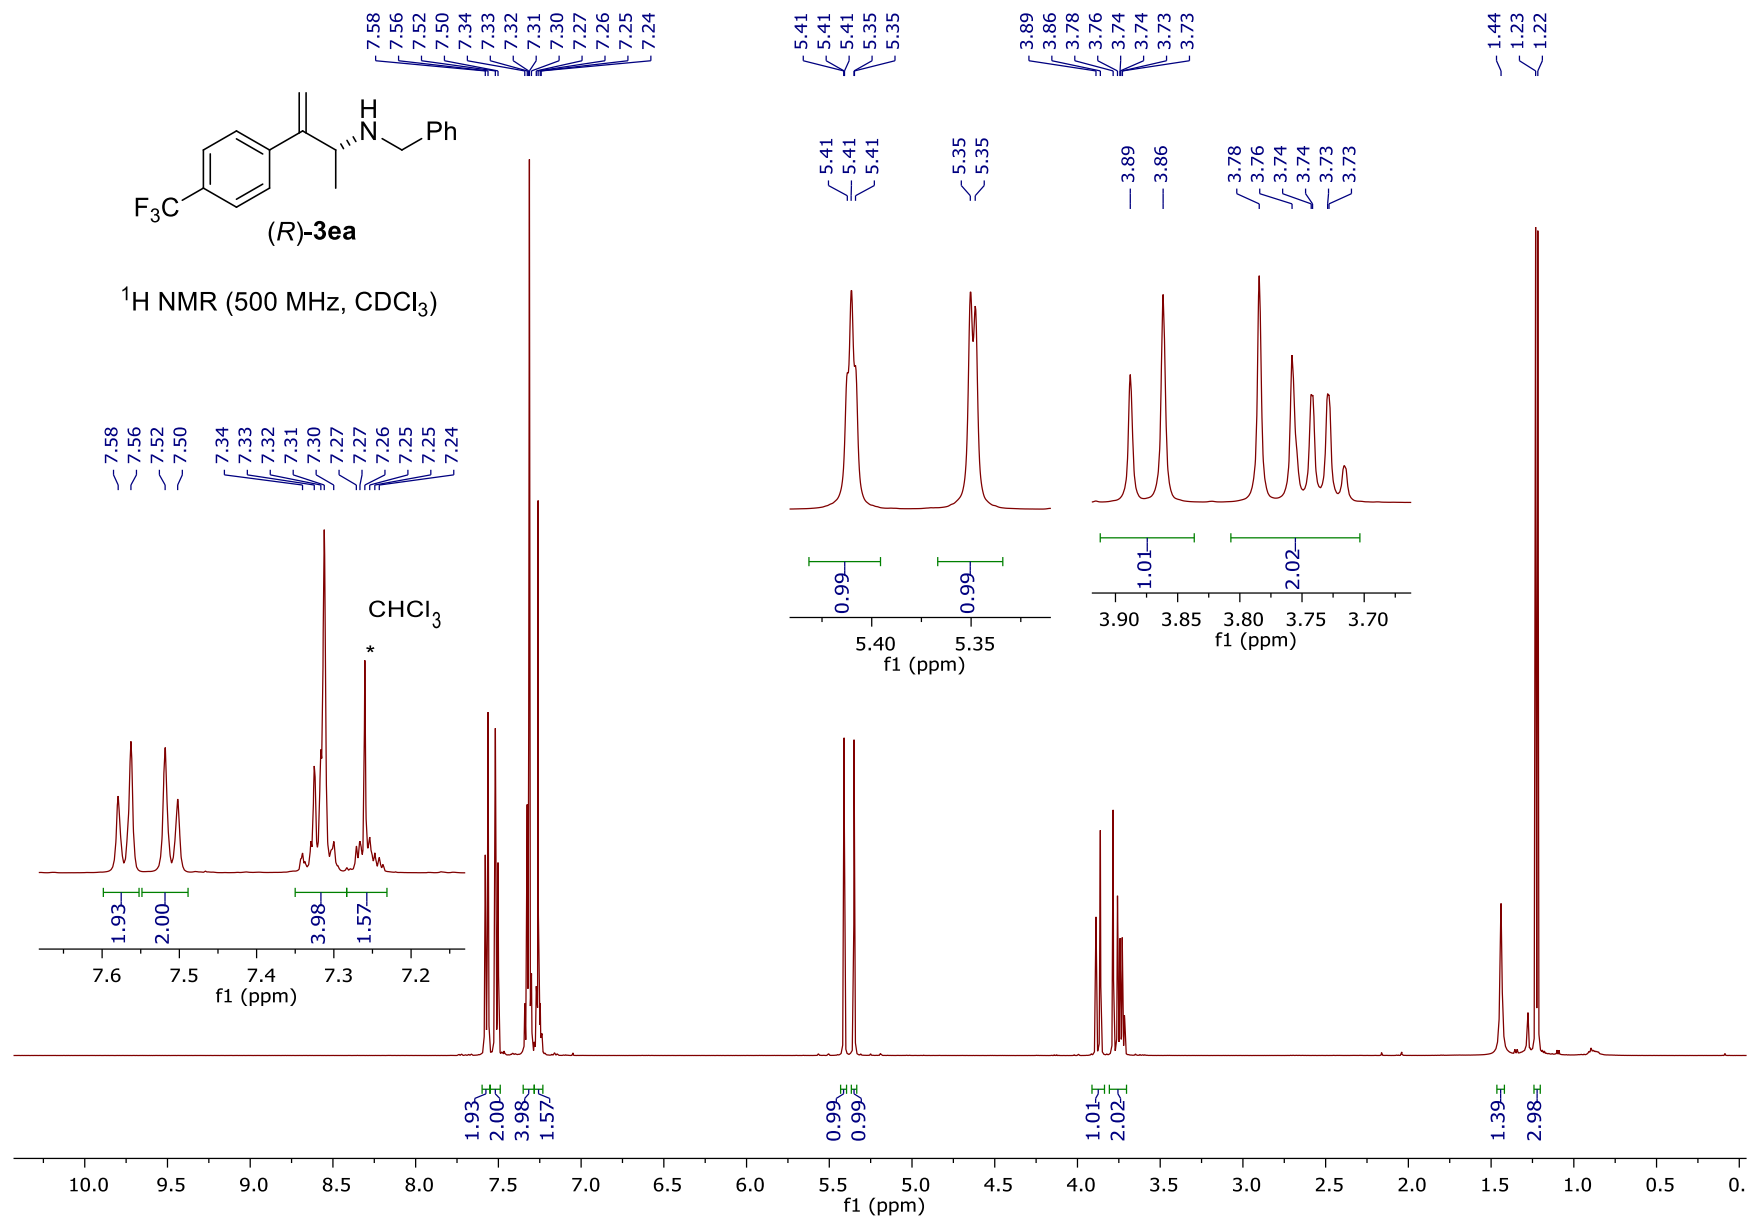

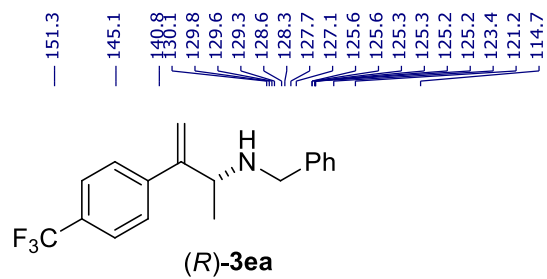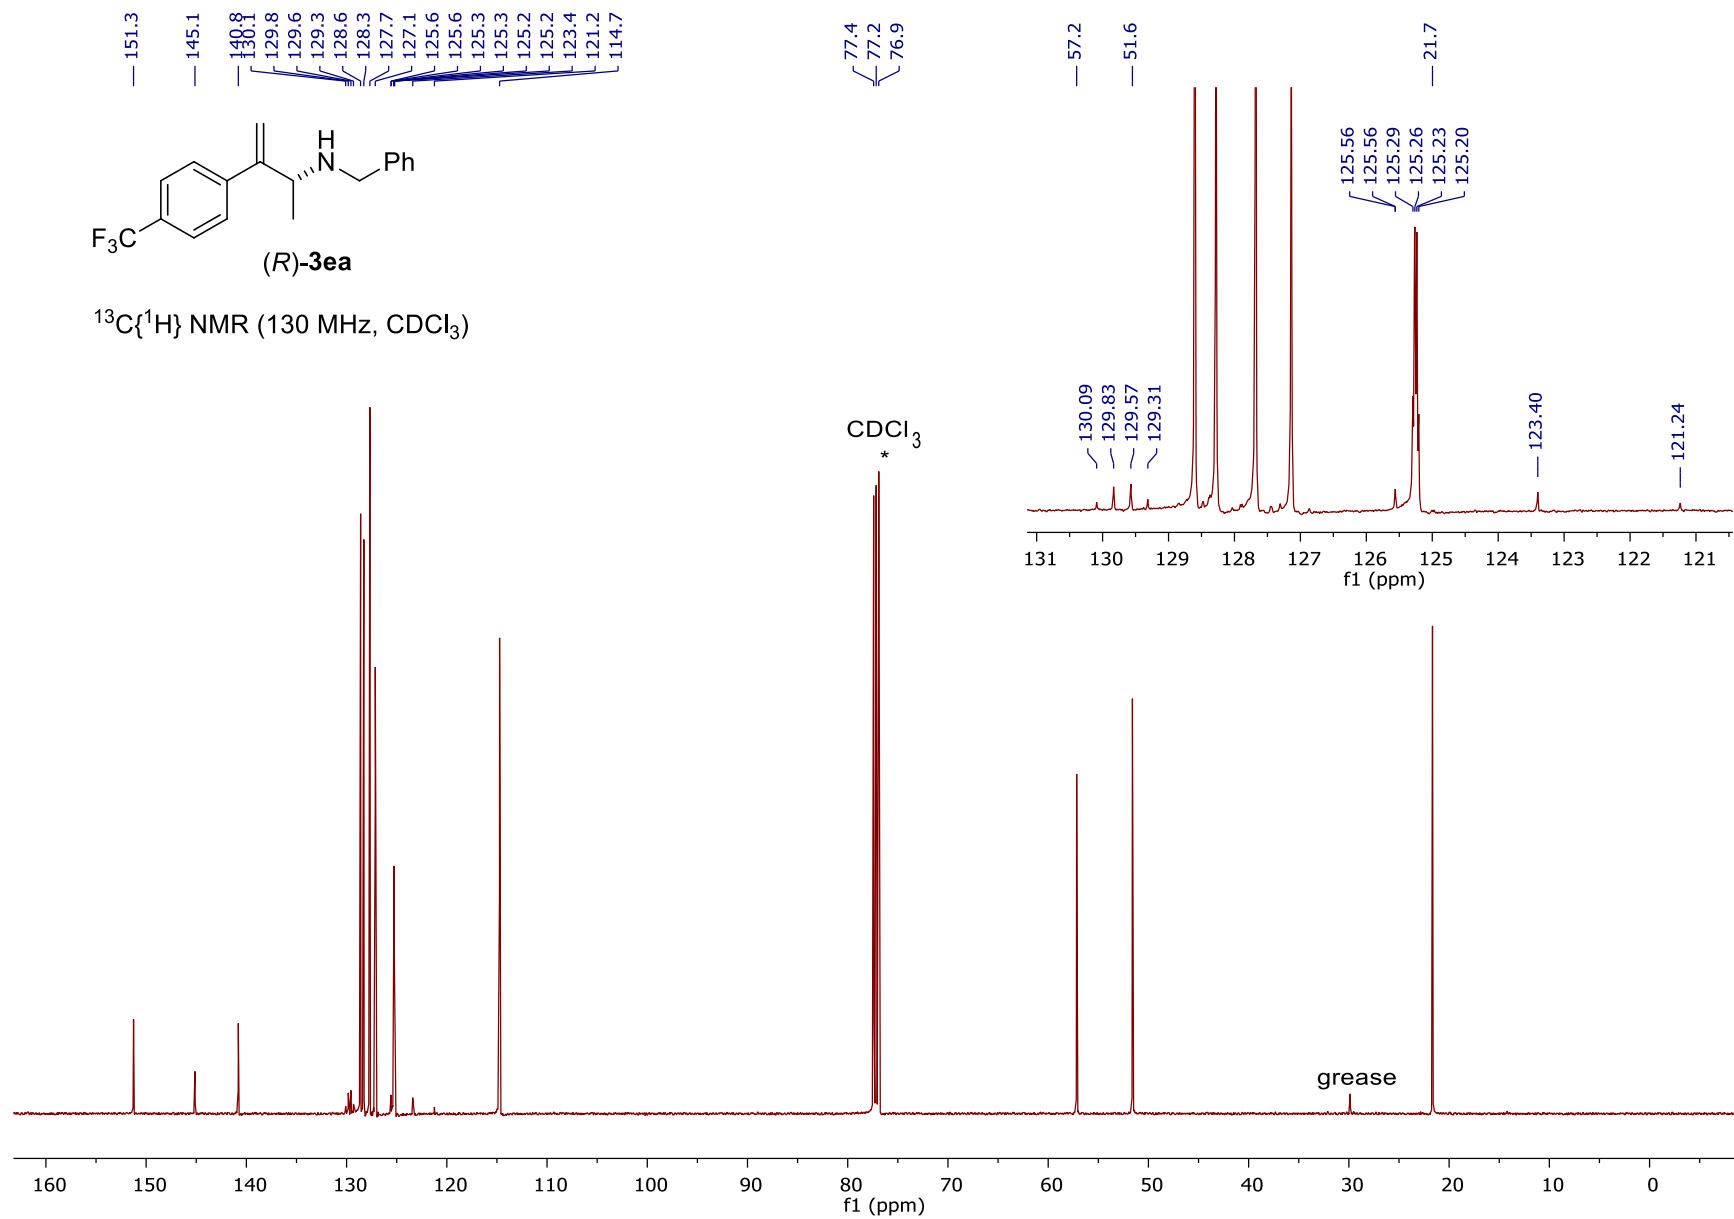

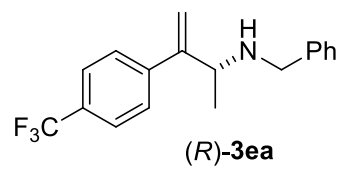

$^{19}\text{F}\{^1\text{H}\}$  NMR (280 MHz,  $\text{CDCl}_3$ )

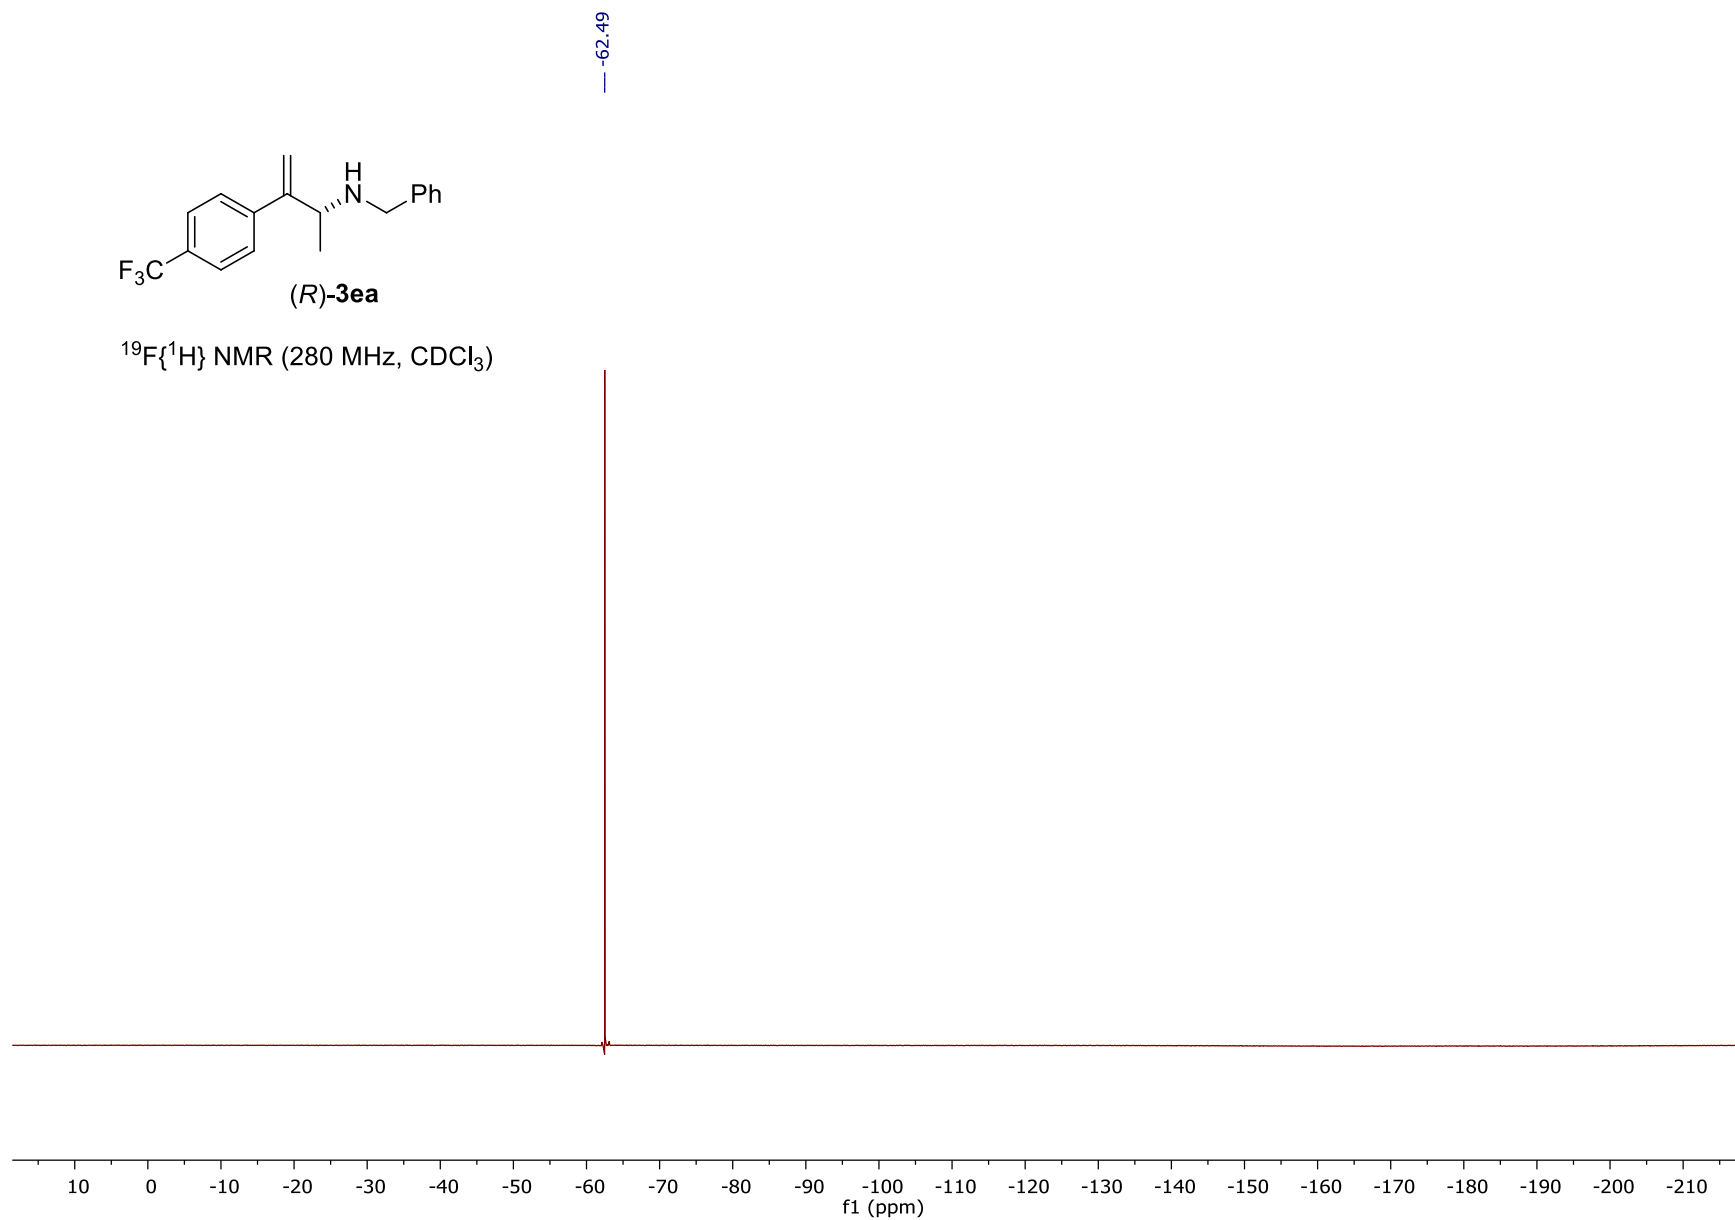

S105

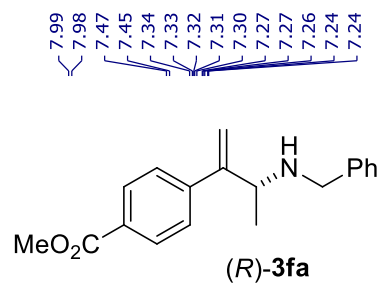

$^1\text{H}$  NMR (500 MHz,  $\text{CDCl}_3$ )

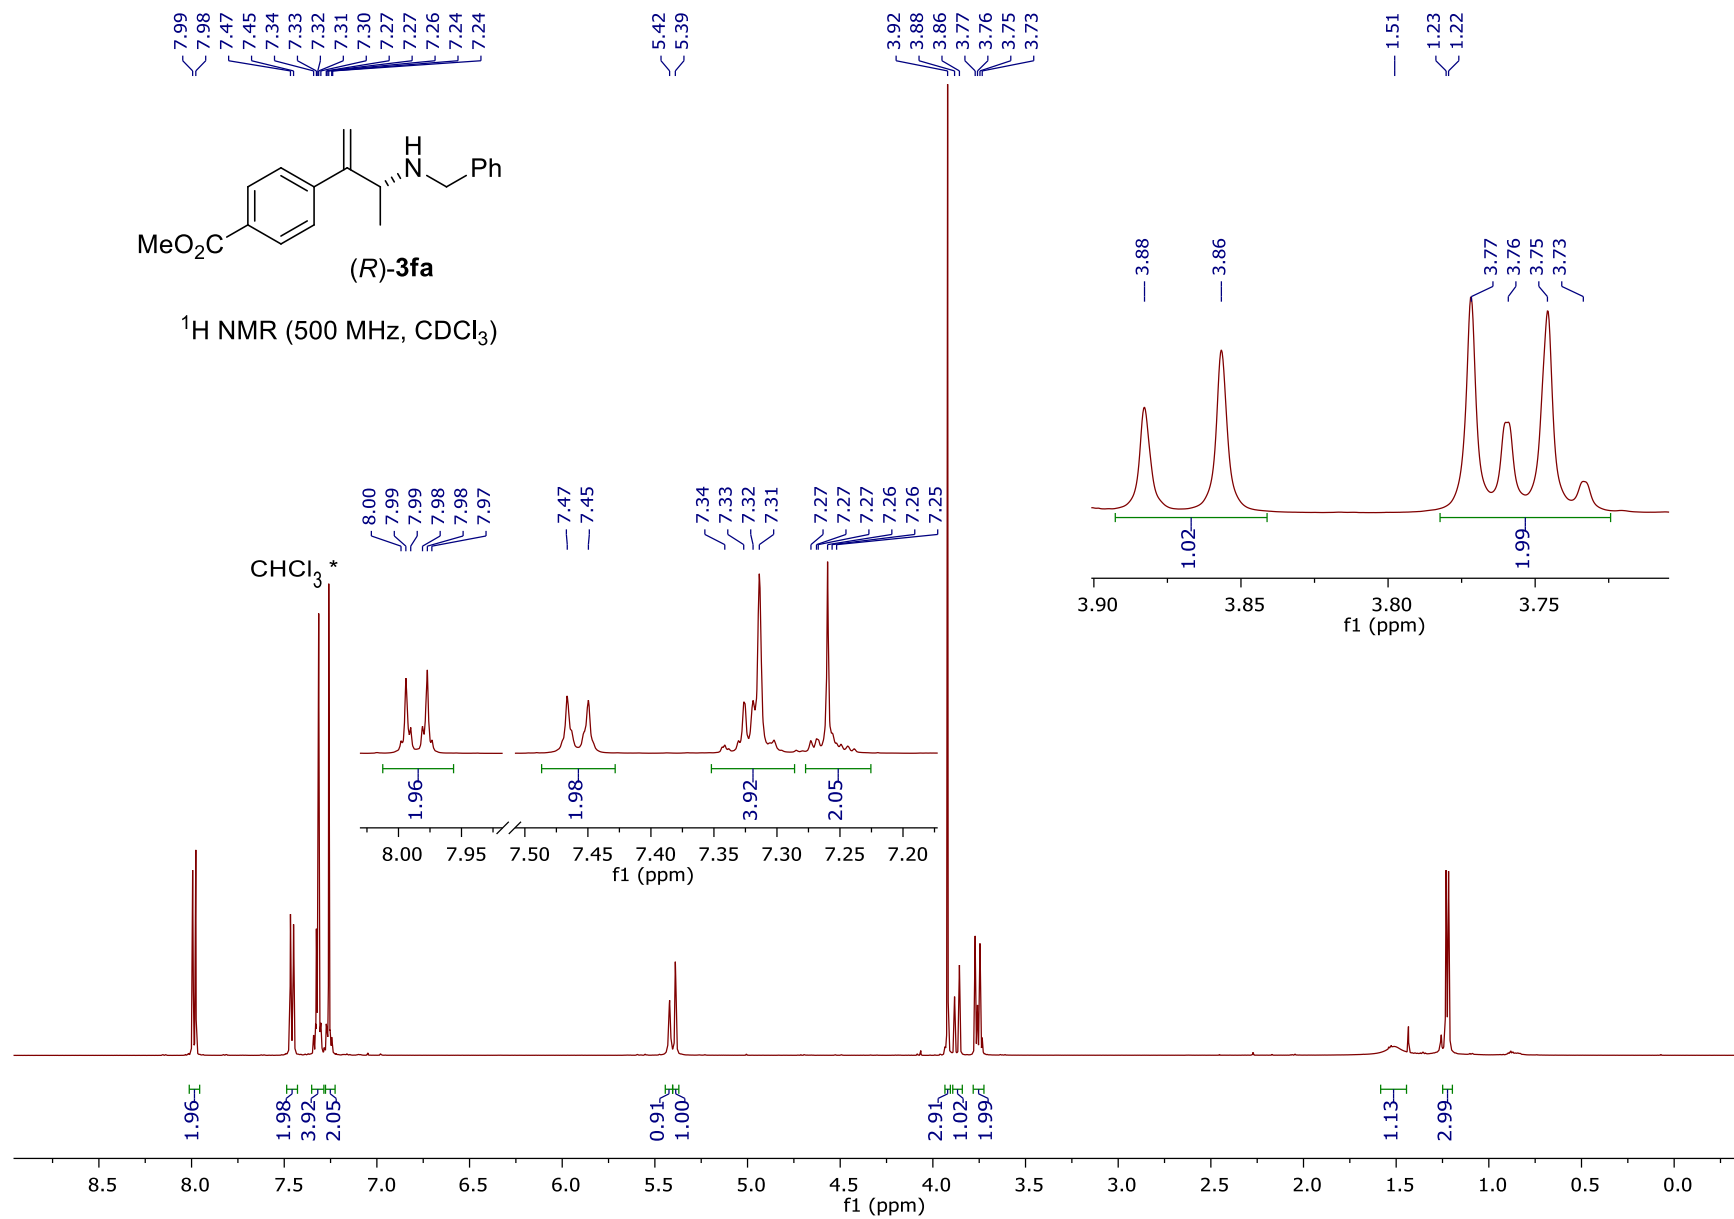

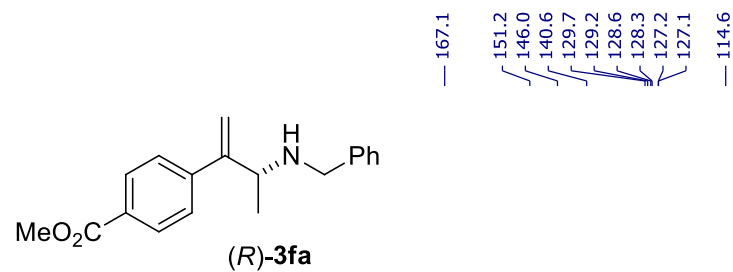

<sup>13</sup>C{<sup>1</sup>H} NMR (130 MHz, CDCl<sub>3</sub>)

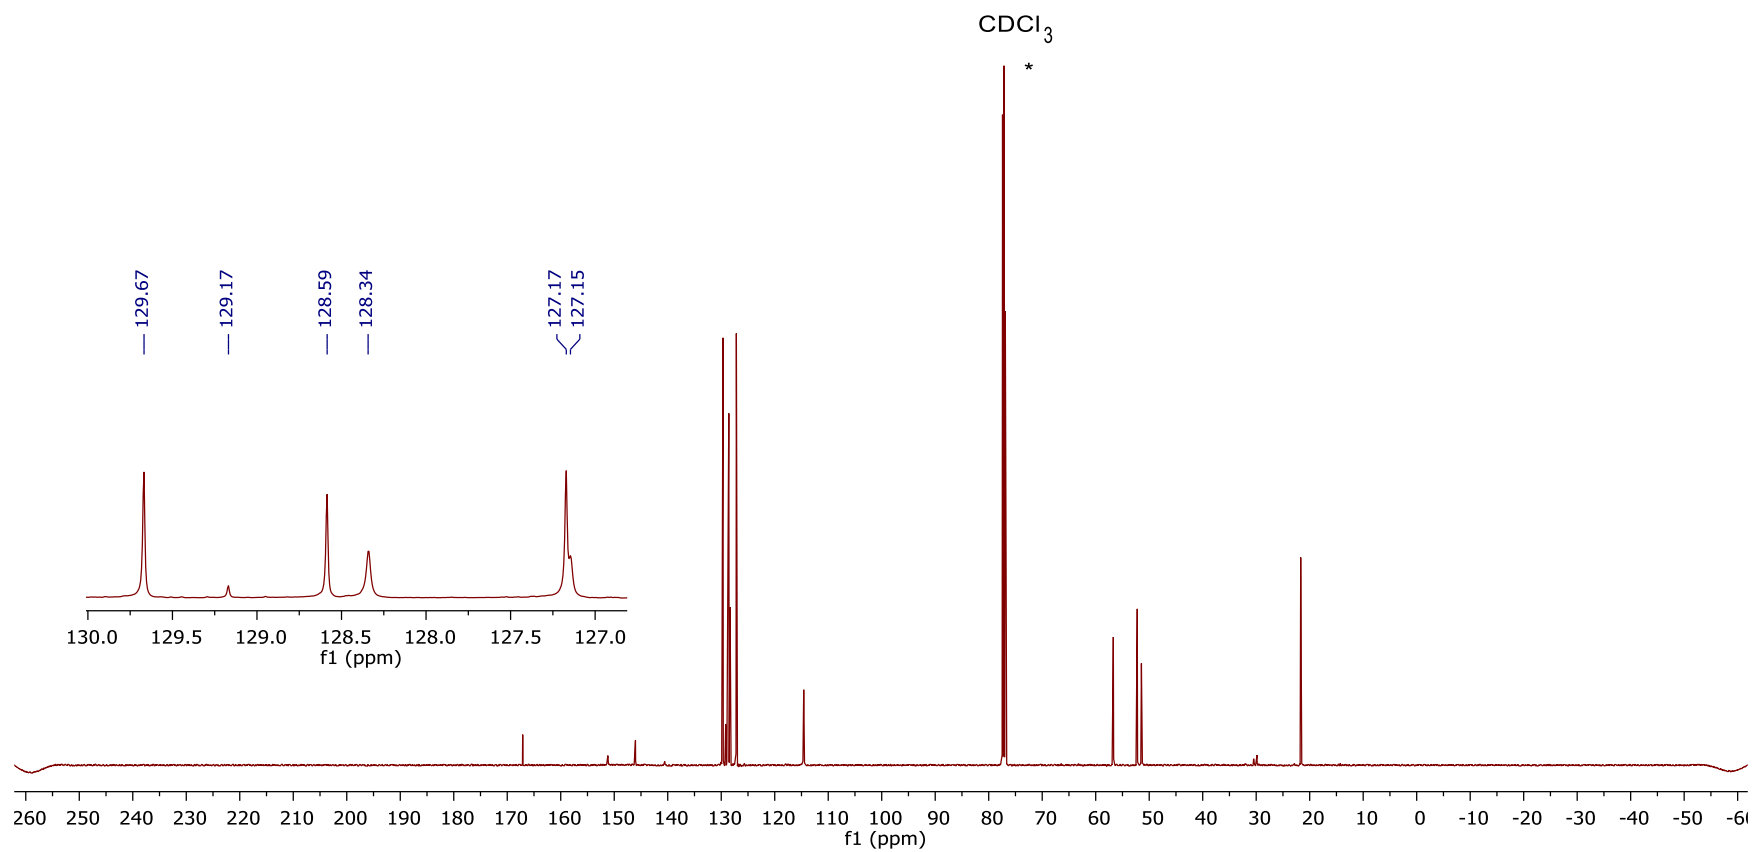

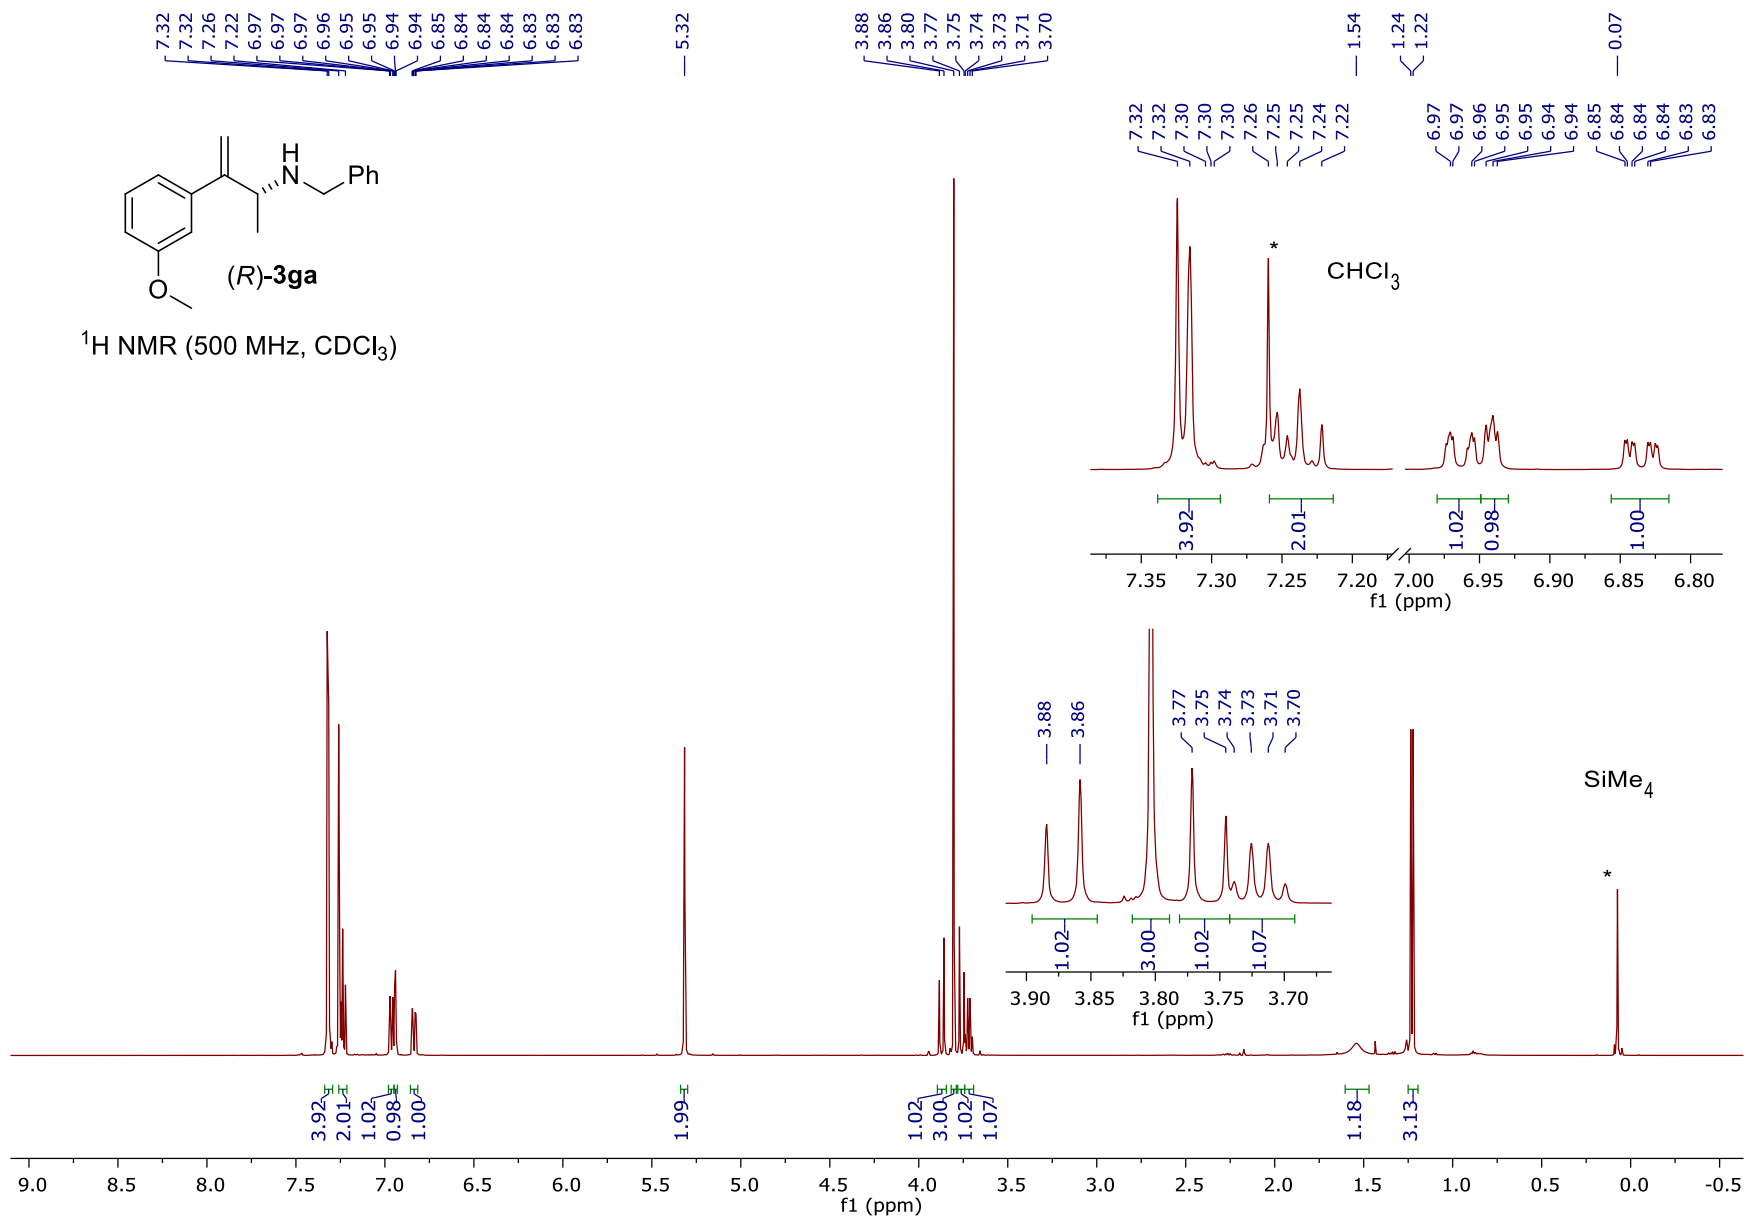



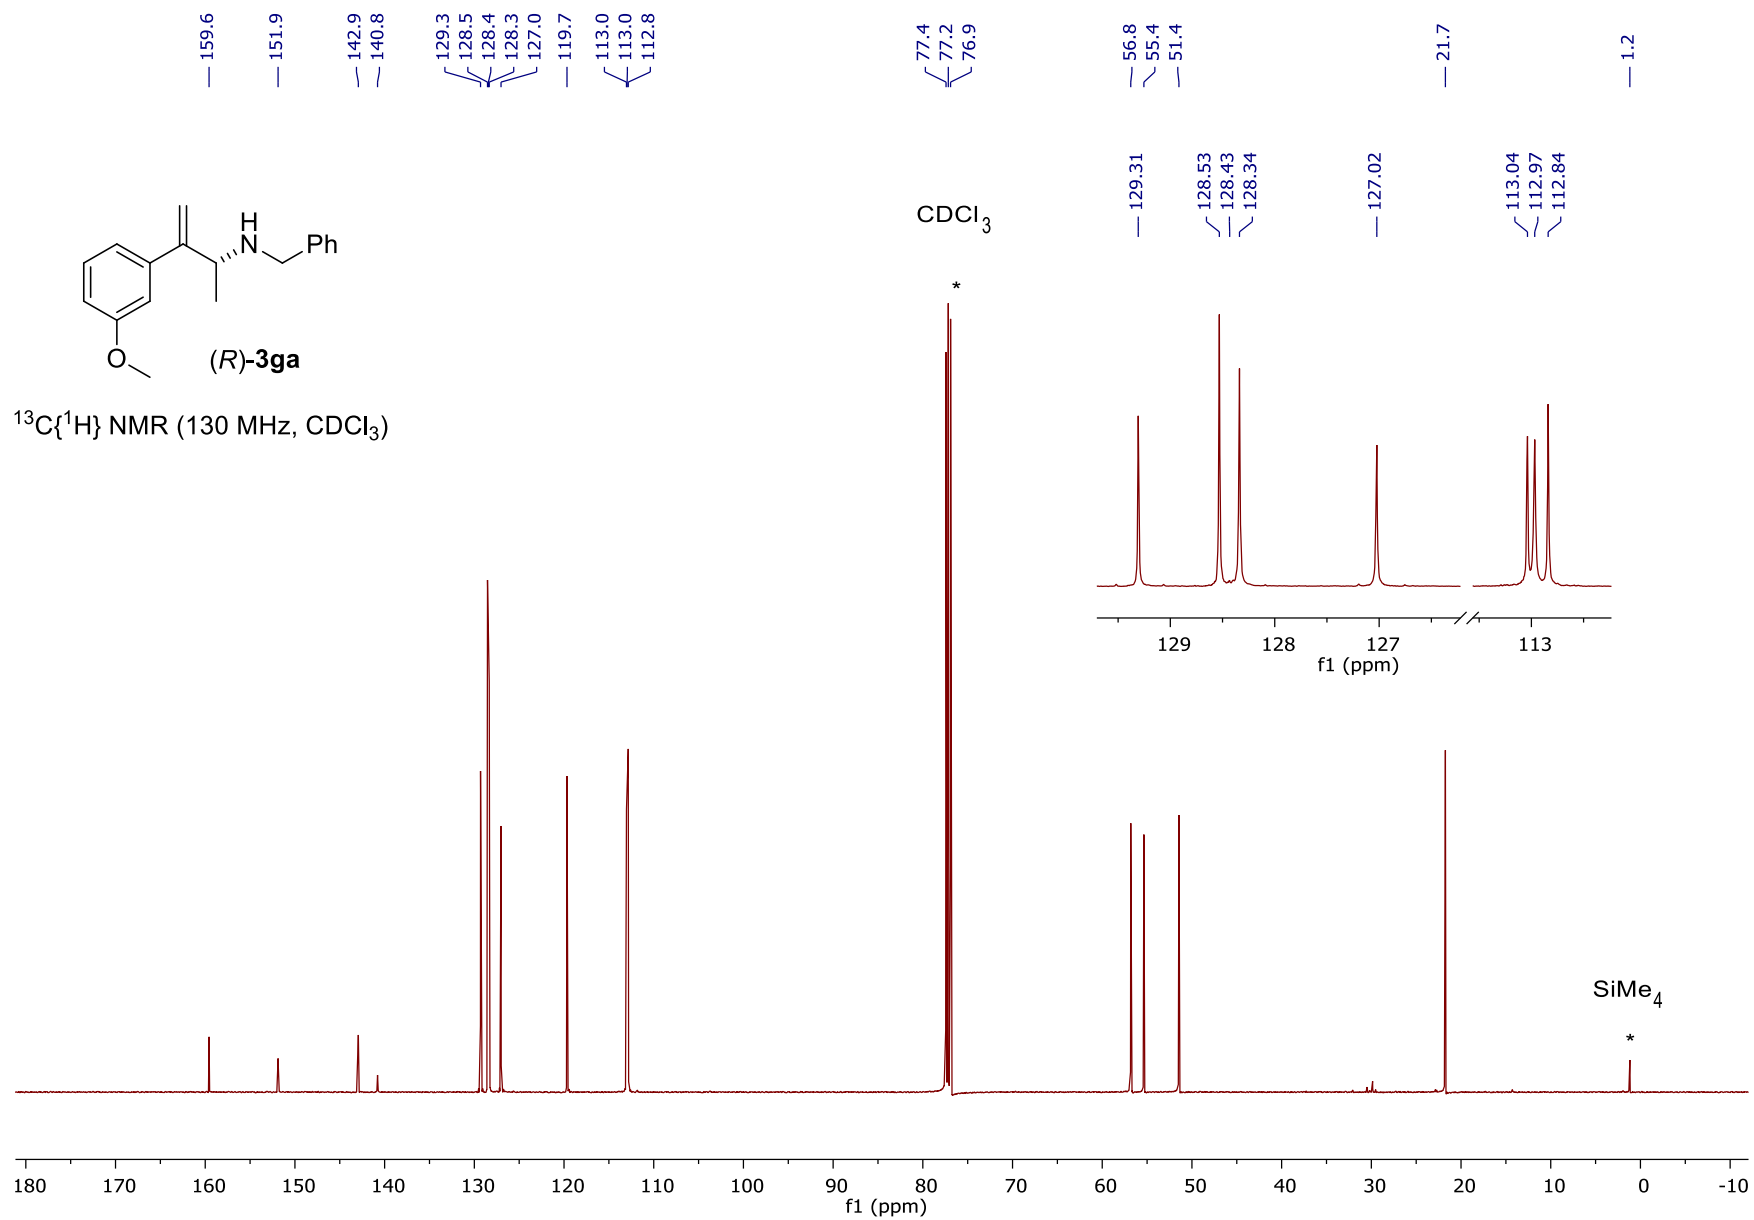

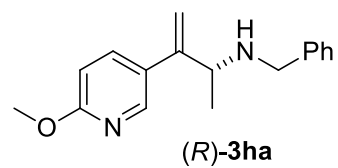

$^1\text{H}$  NMR (500 MHz,  $\text{CDCl}_3$ )

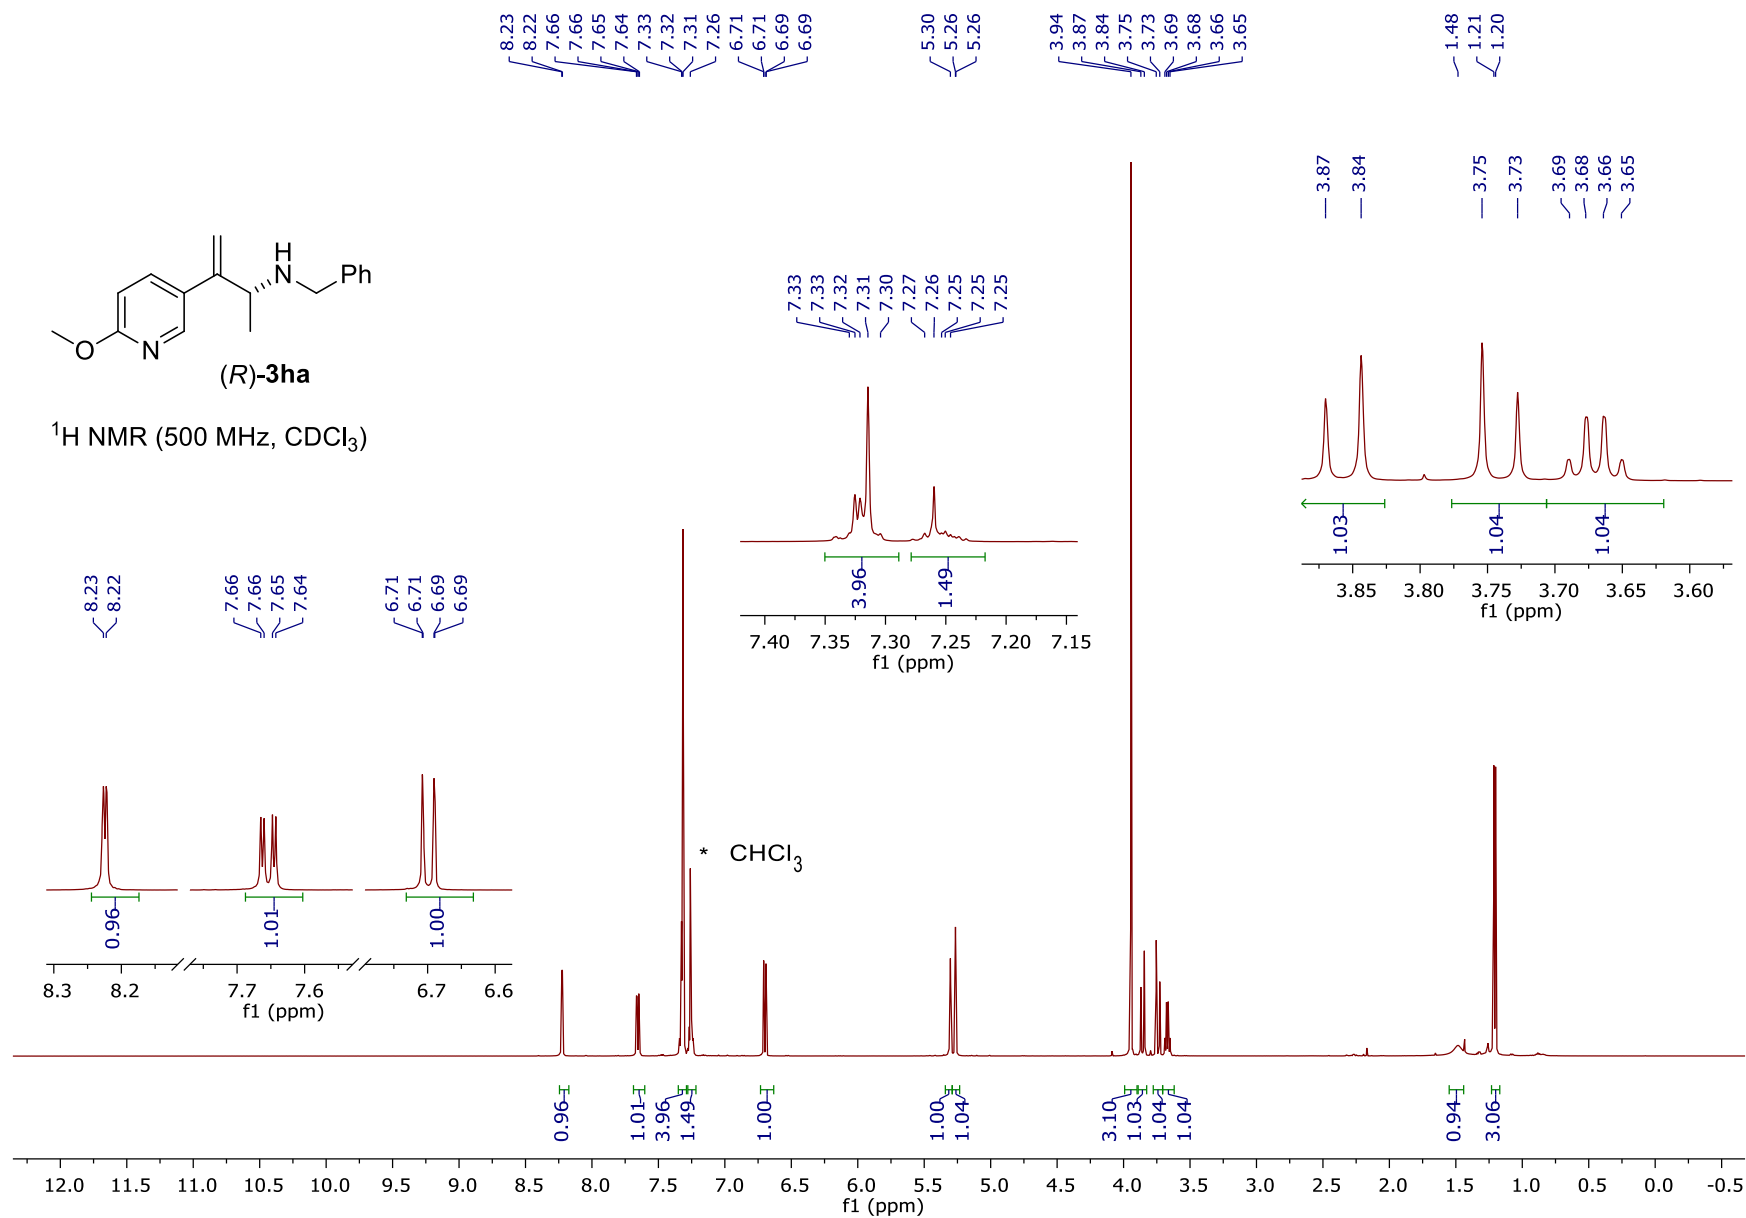

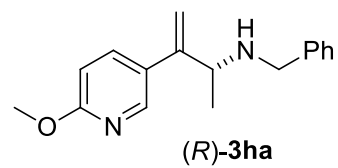

— 163.7

— 148.5

— 145.2

— 140.6

— 137.7

— 129.9

— 128.6

— 128.3

— 127.1

— 113.4

— 110.3

— 77.4

— 77.2

— 76.9

— 57.2

— 53.6

— 51.5

— 21.6

$^{13}\text{C}\{^1\text{H}\}$  NMR (130 MHz,  $\text{CDCl}_3$ )

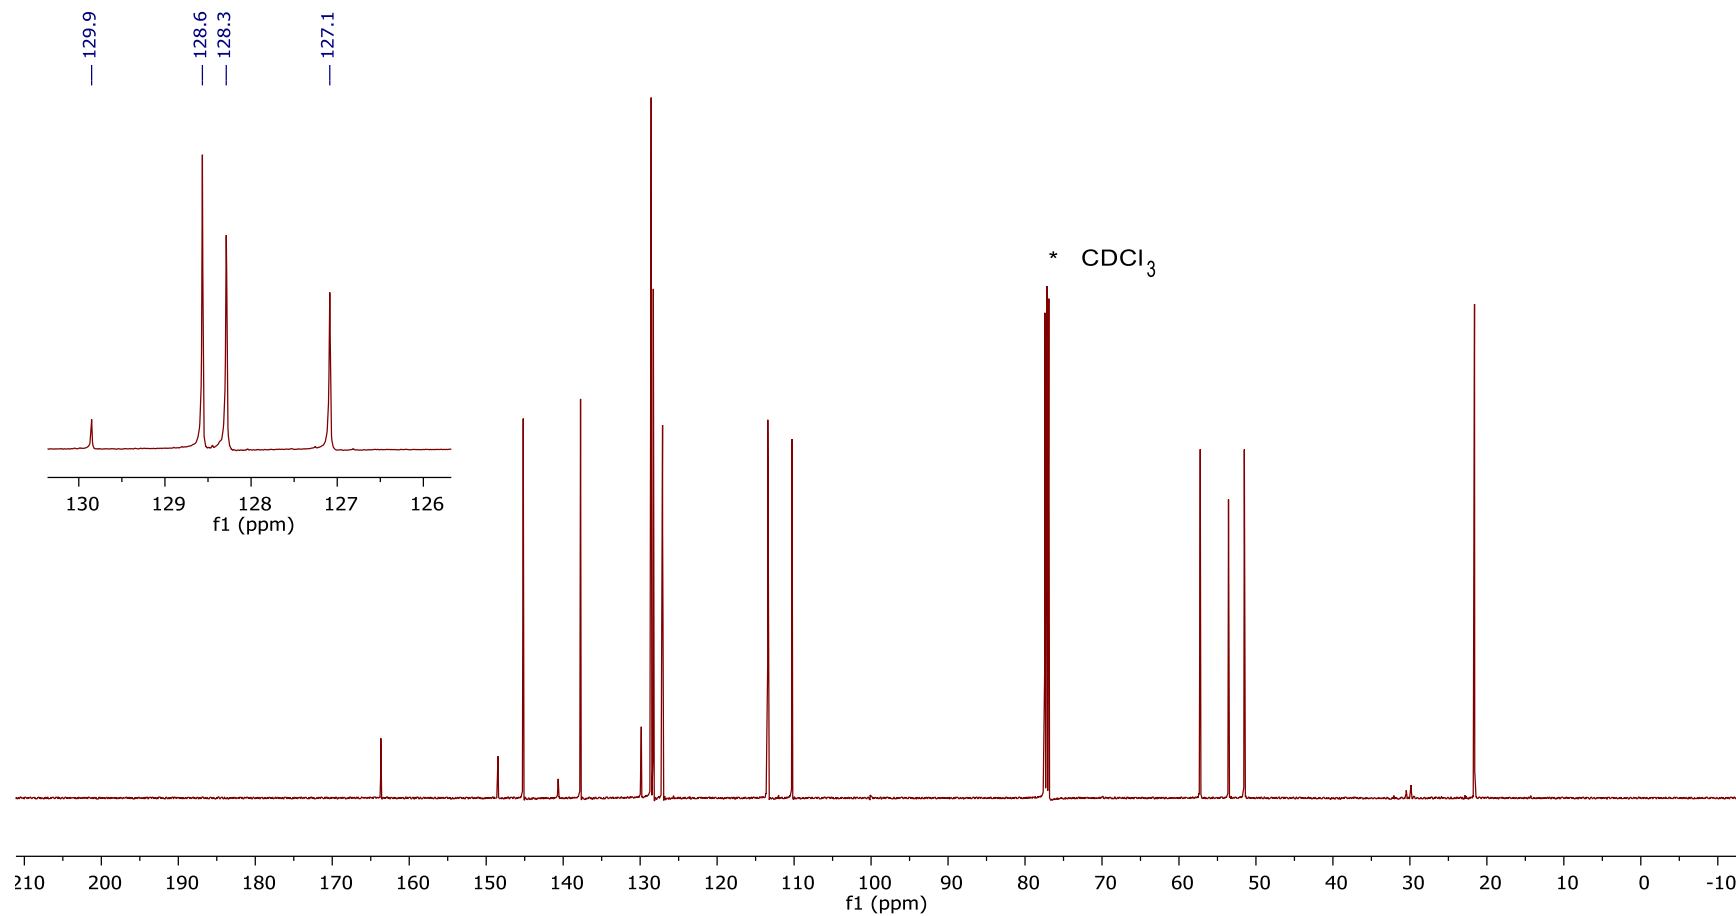

S111

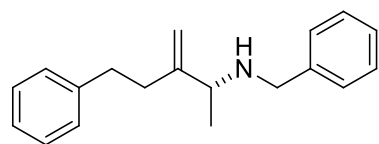

(*R*)-3ia

<sup>1</sup>H NMR (300 MHz, CDCl<sub>3</sub>)

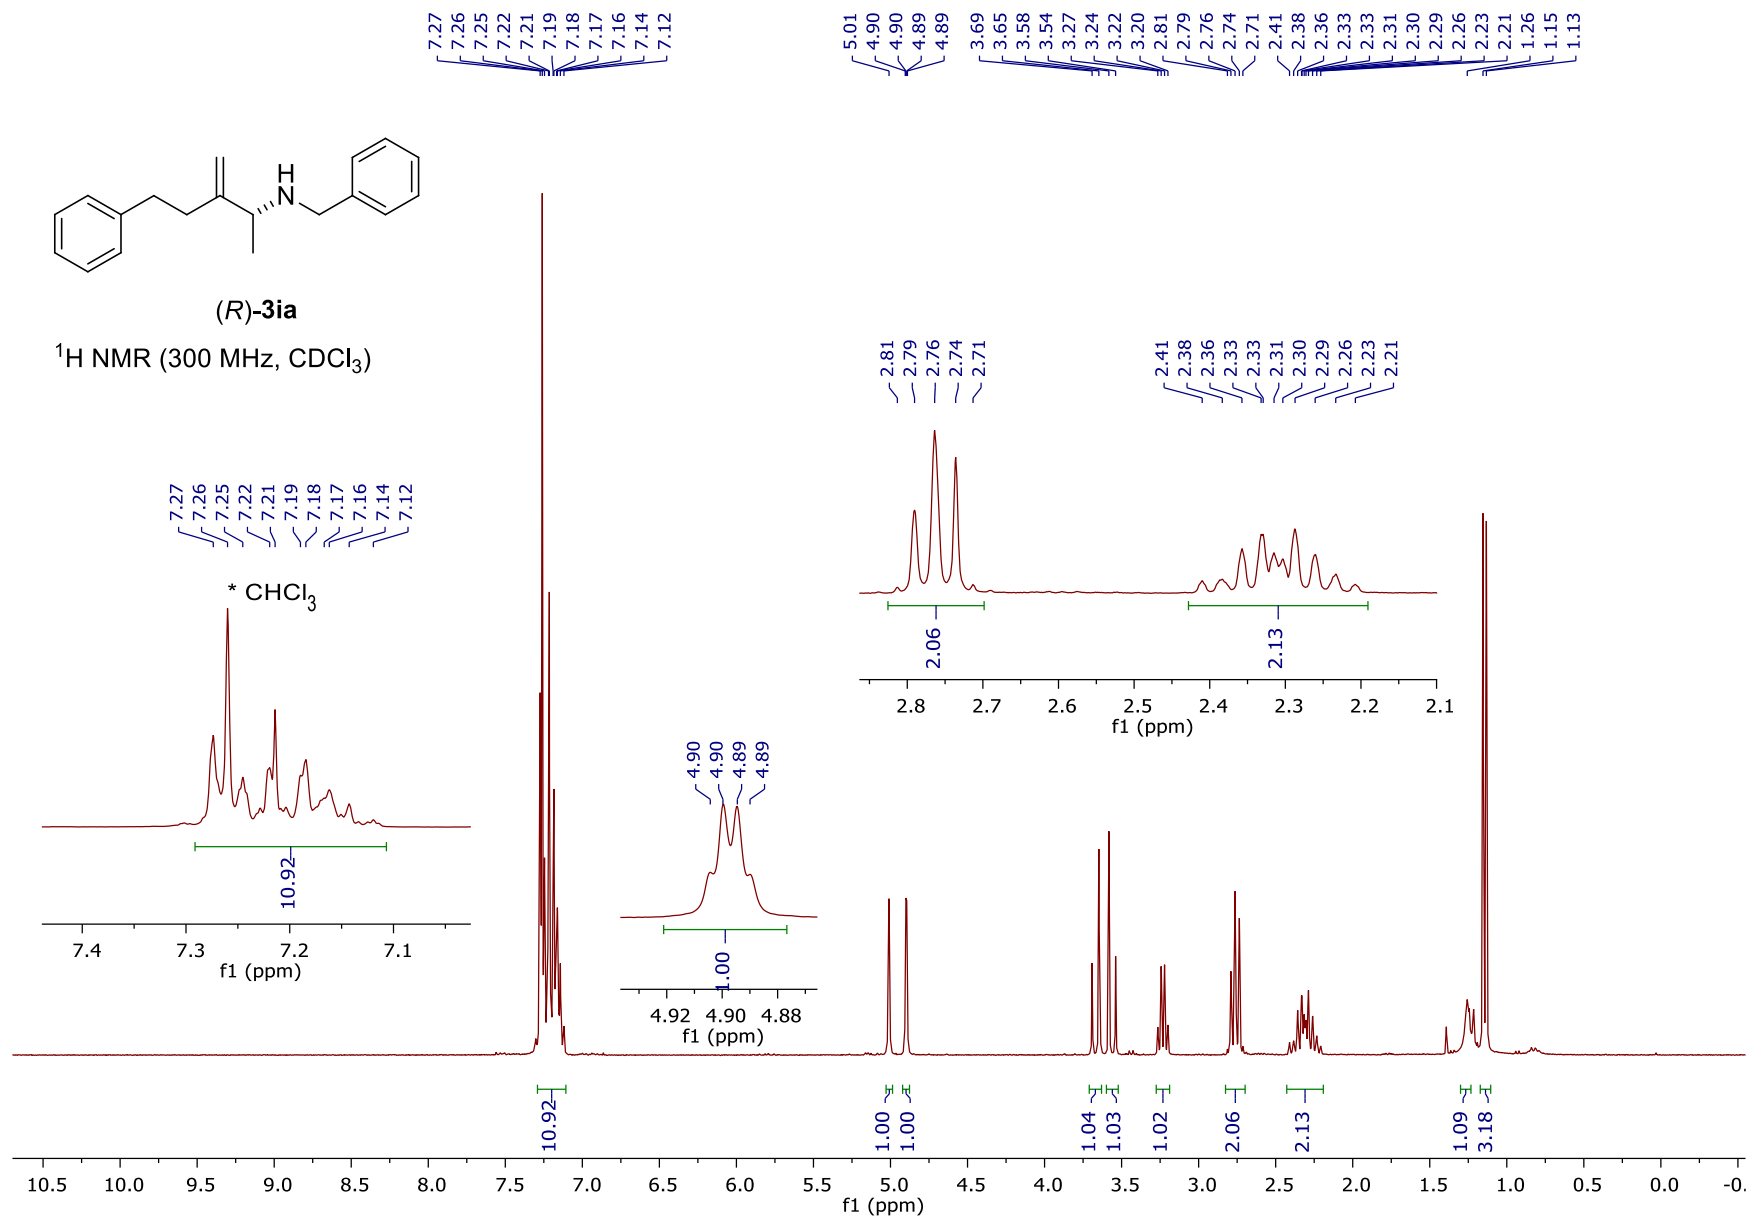

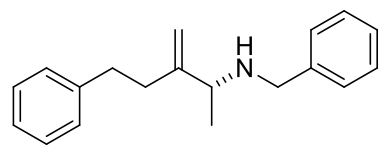

**(R)-3ia**

$^{13}\text{C}\{^1\text{H}\}$  NMR (75 MHz,  $\text{CDCl}_3$ )

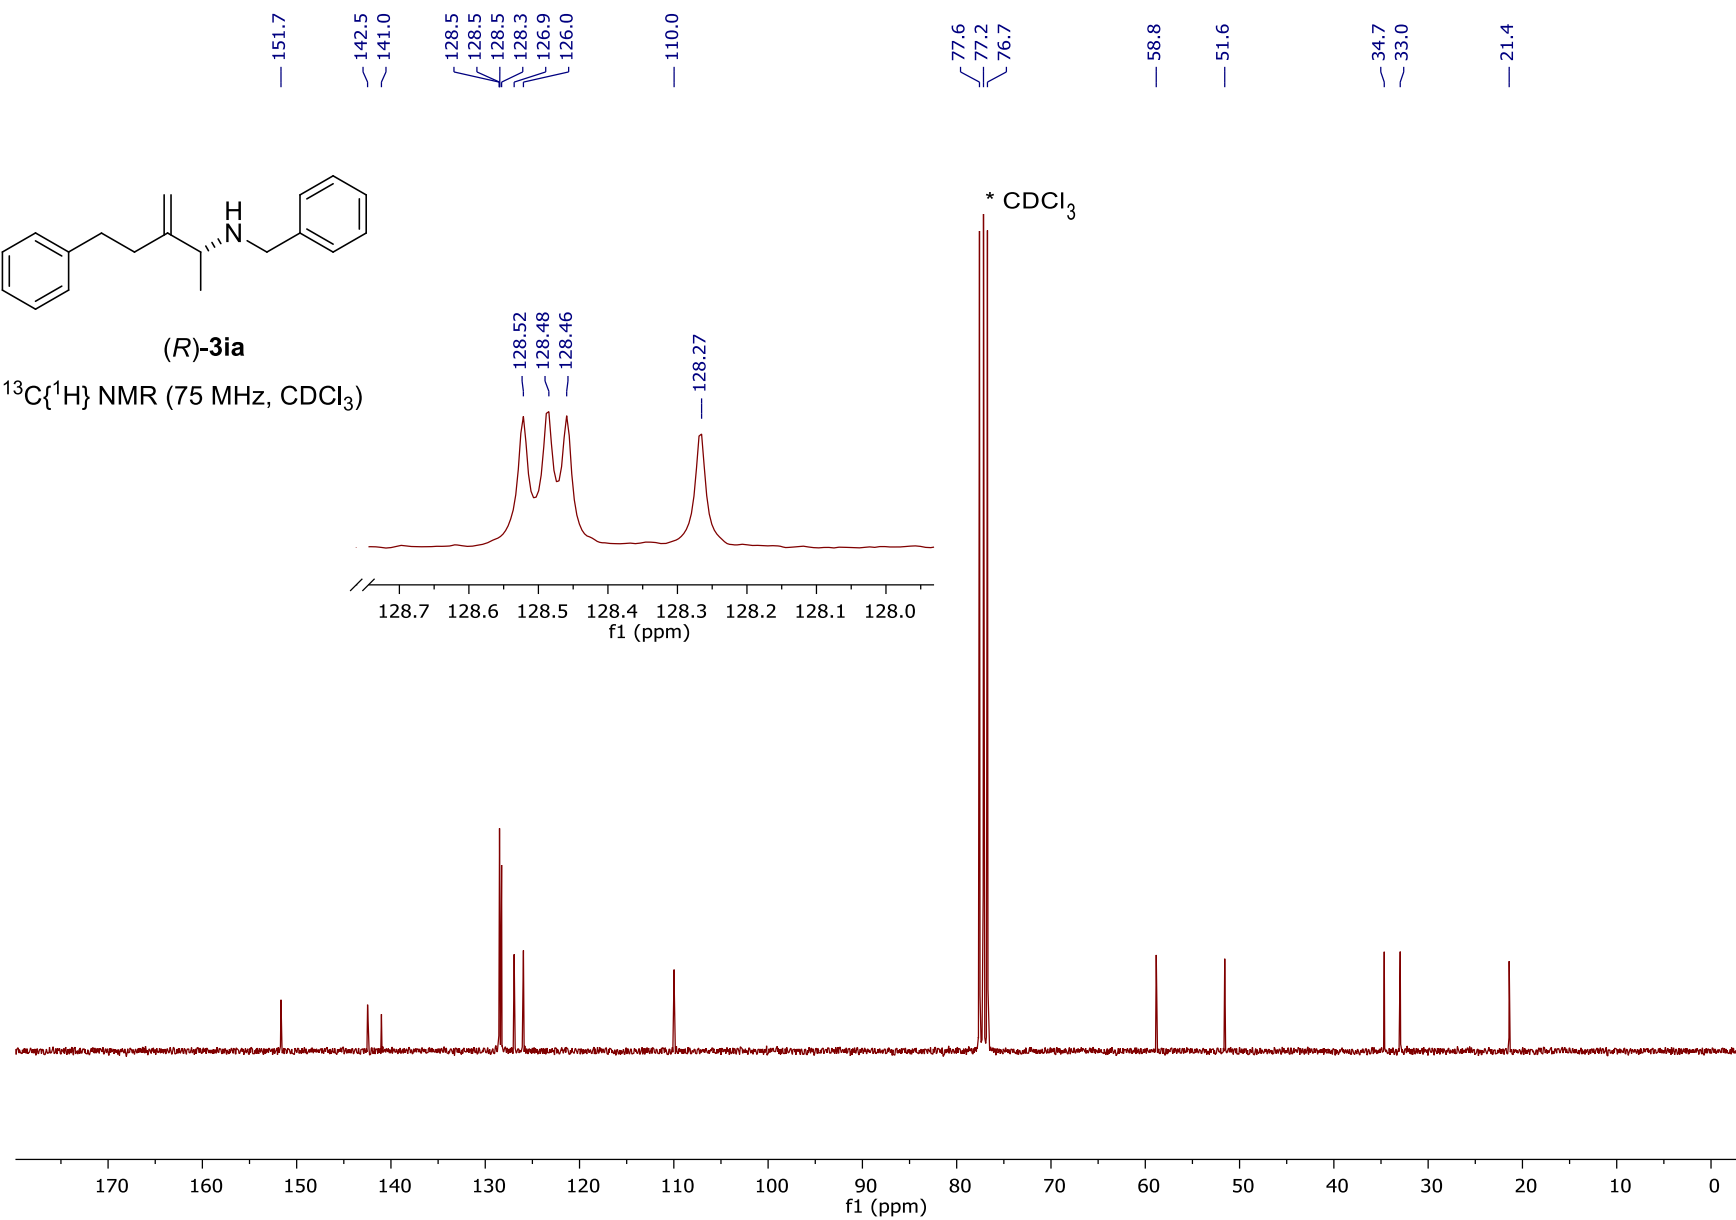

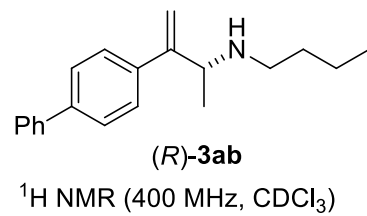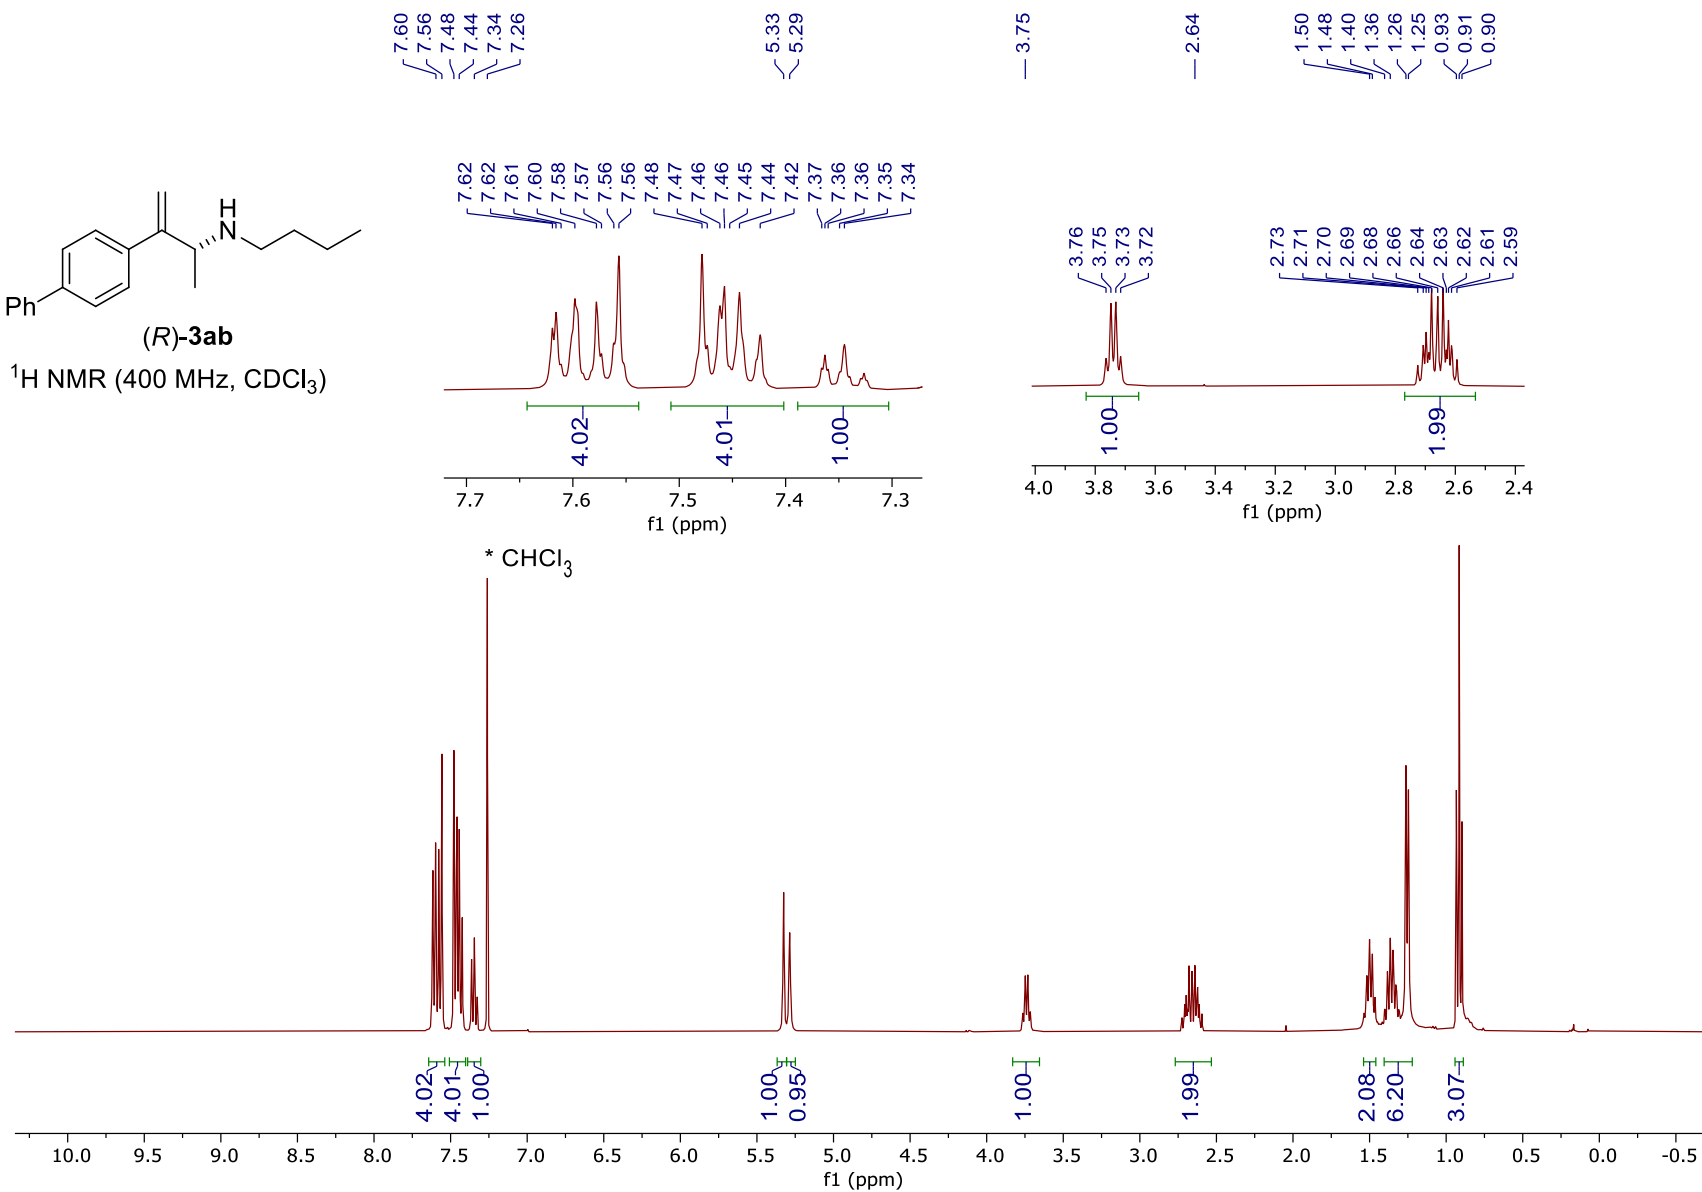

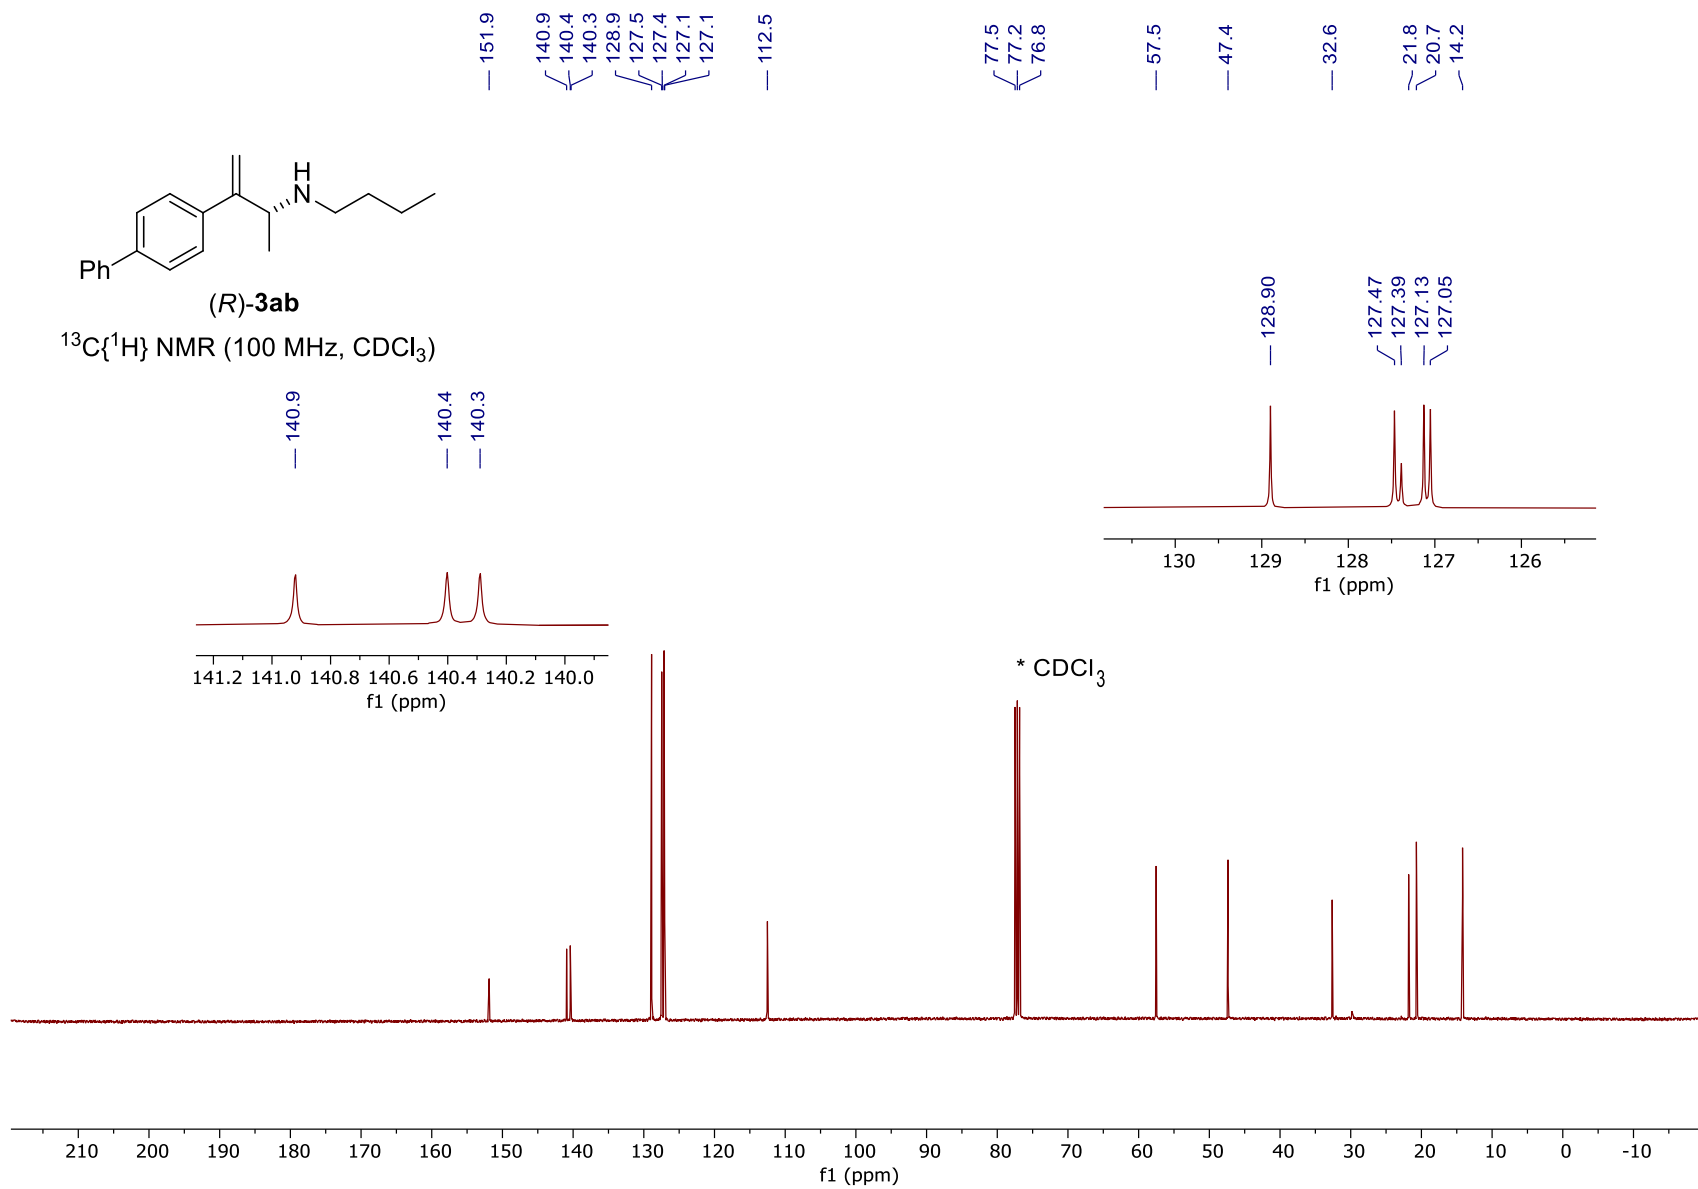

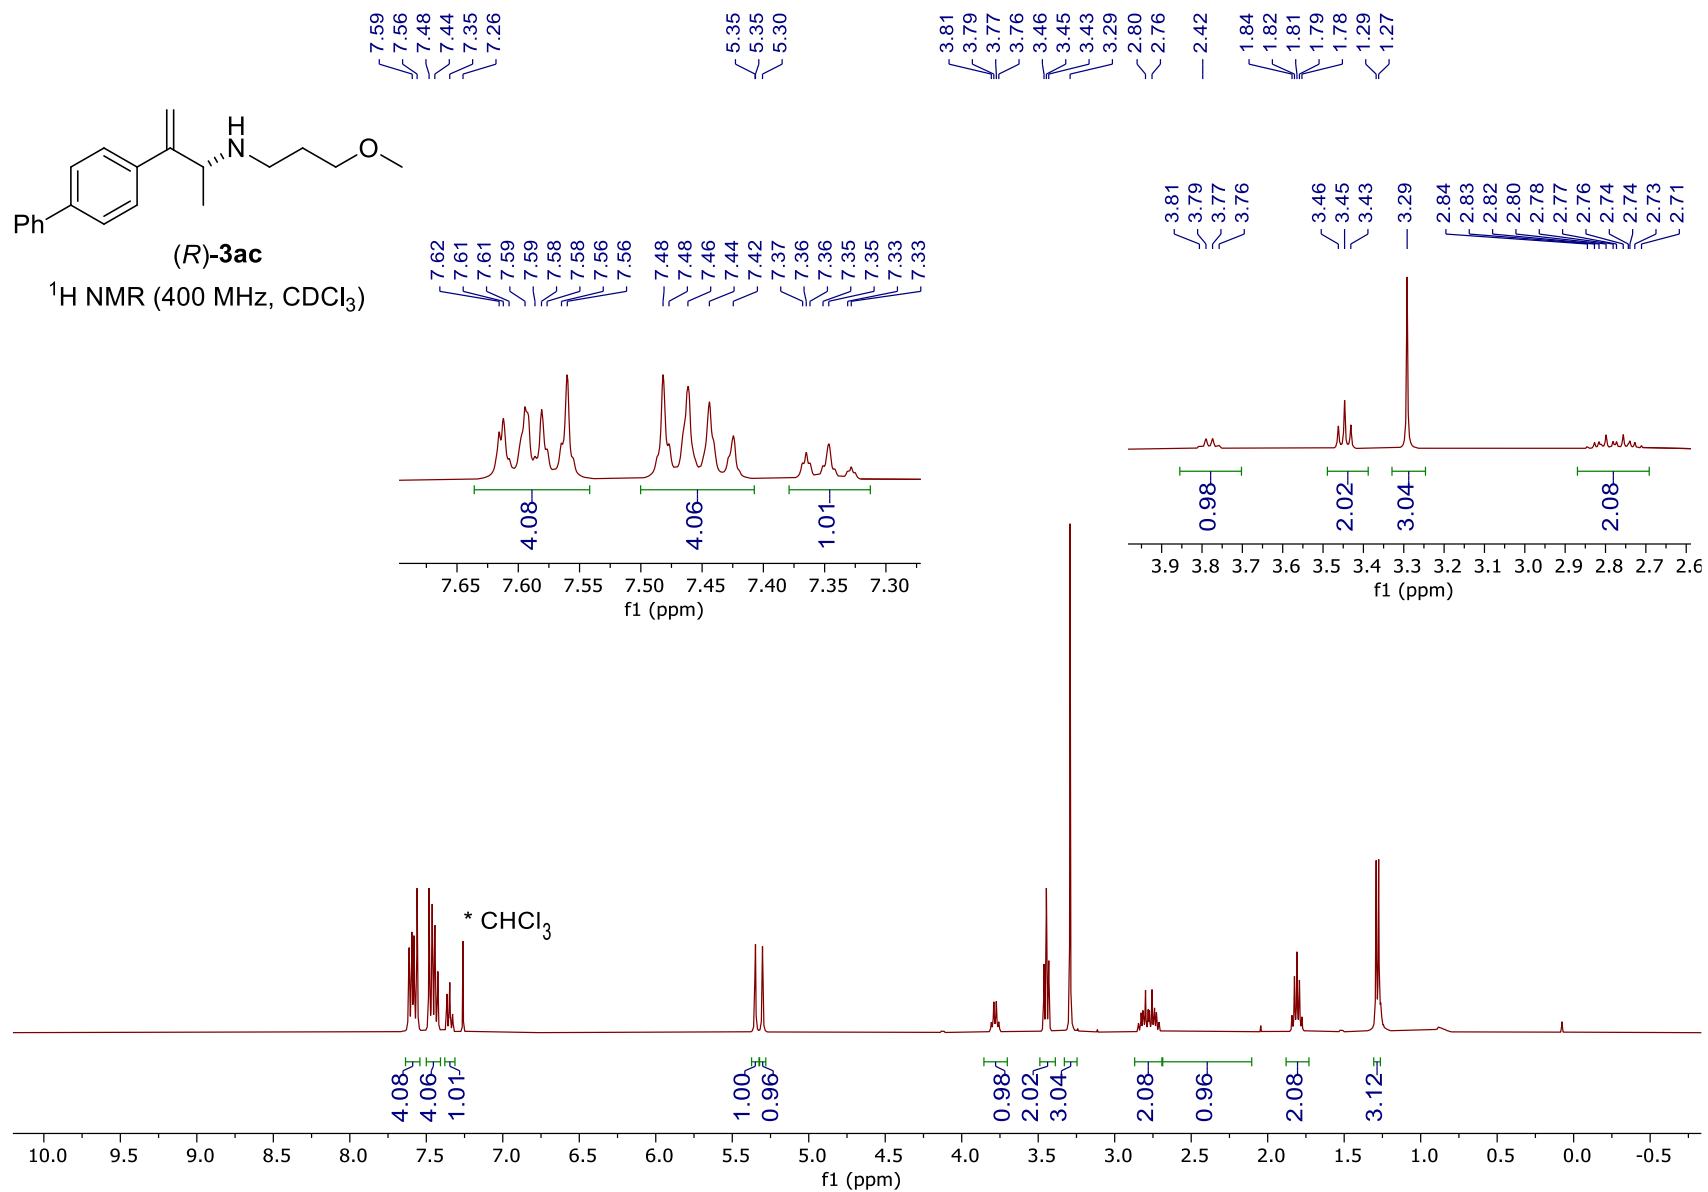



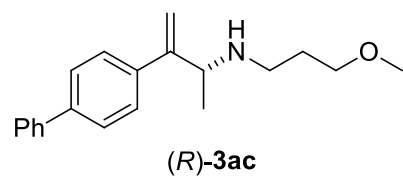

$^{13}\text{C}\{^1\text{H}\}$  NMR (100 MHz,  $\text{CDCl}_3$ )

— 151.3  
 — 140.9  
 — 140.4  
 — 140.2  
 — 128.9  
 — 127.5  
 — 127.4  
 — 127.1  
 — 127.1  
 — 113.0

— 77.5  
 — 77.2  
 — 76.8  
 — 71.6

— 58.8  
 — 57.5

— 44.9

— 30.1

— 21.4

— 140.9

— 140.4

— 140.2

— 128.92

— 127.47

— 127.43

— 127.12

— 127.10

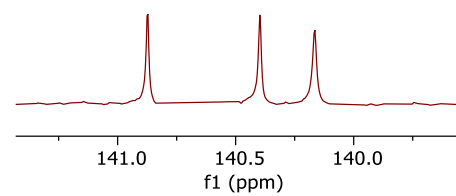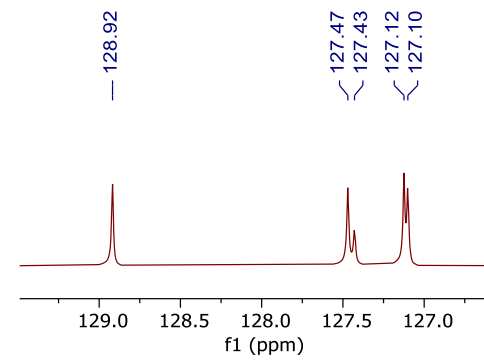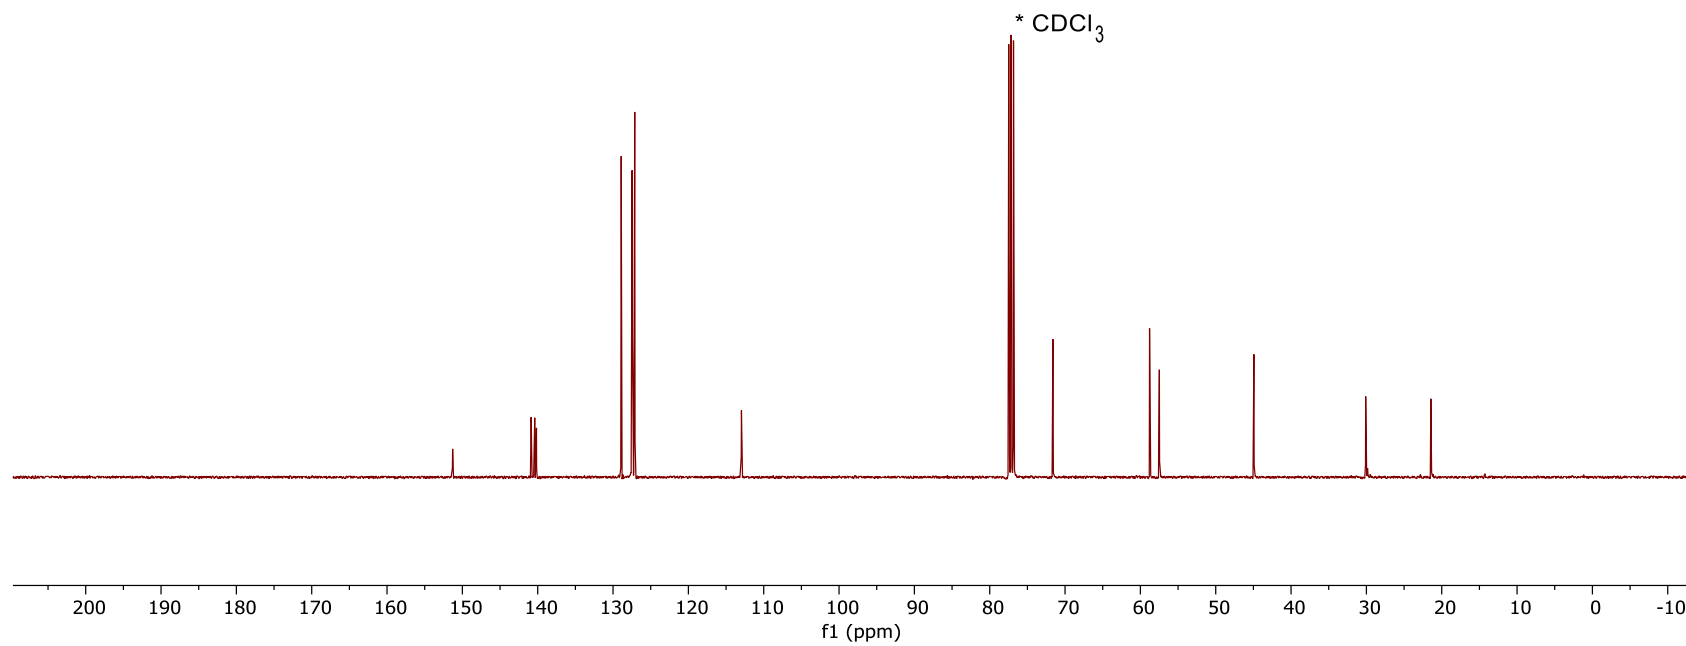

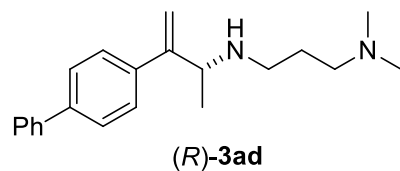

<sup>1</sup>H NMR (400 MHz, CDCl<sub>3</sub>)

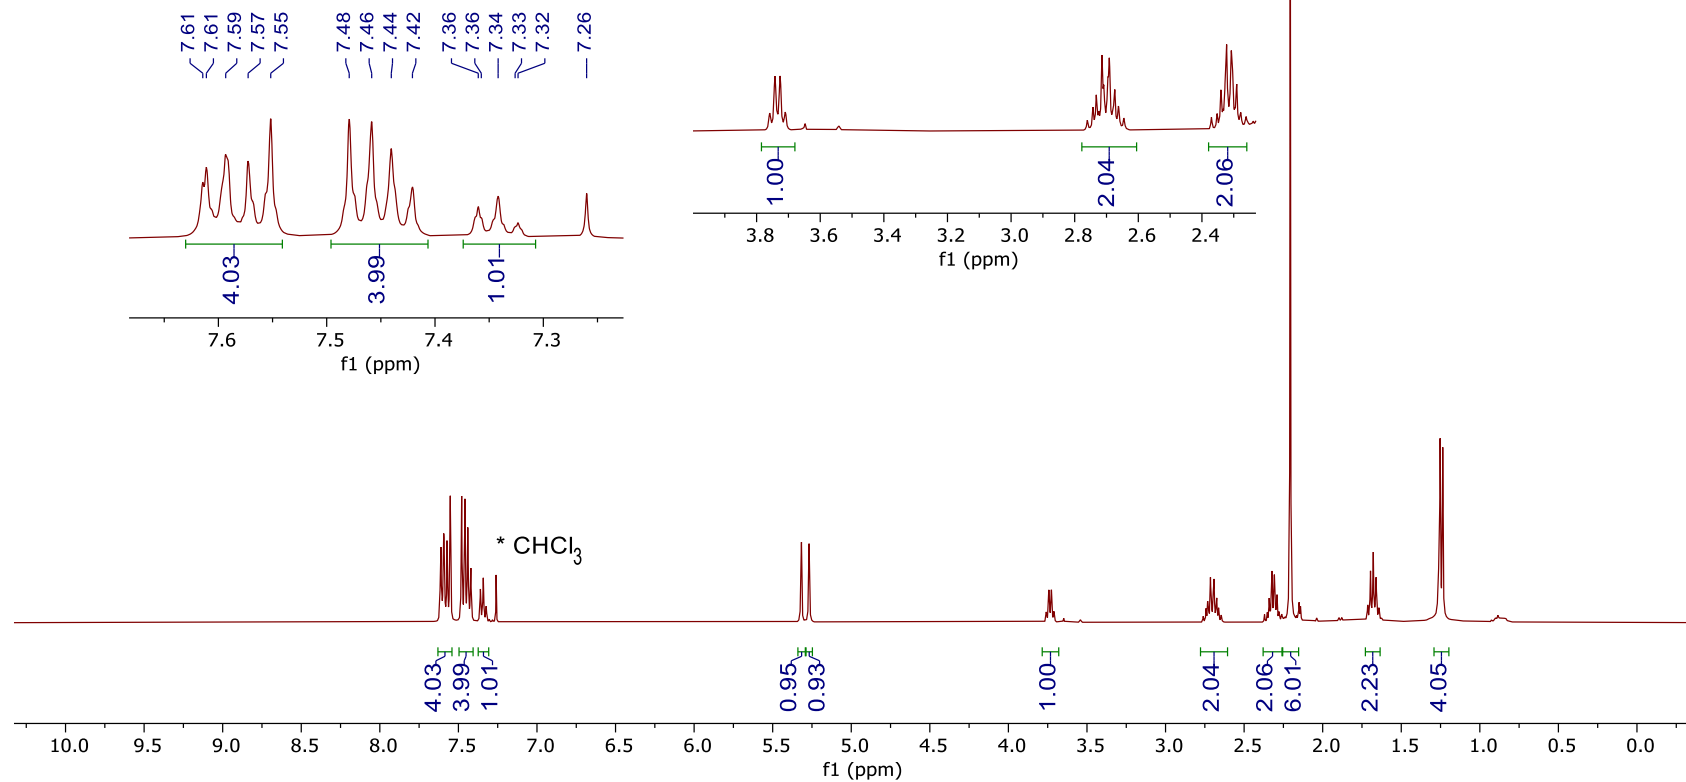

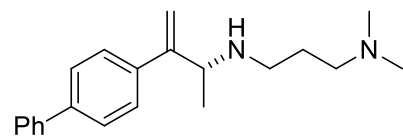

(R)-3ad

$^{13}\text{C}\{^1\text{H}\}$  NMR (100 MHz,  $\text{CDCl}_3$ )

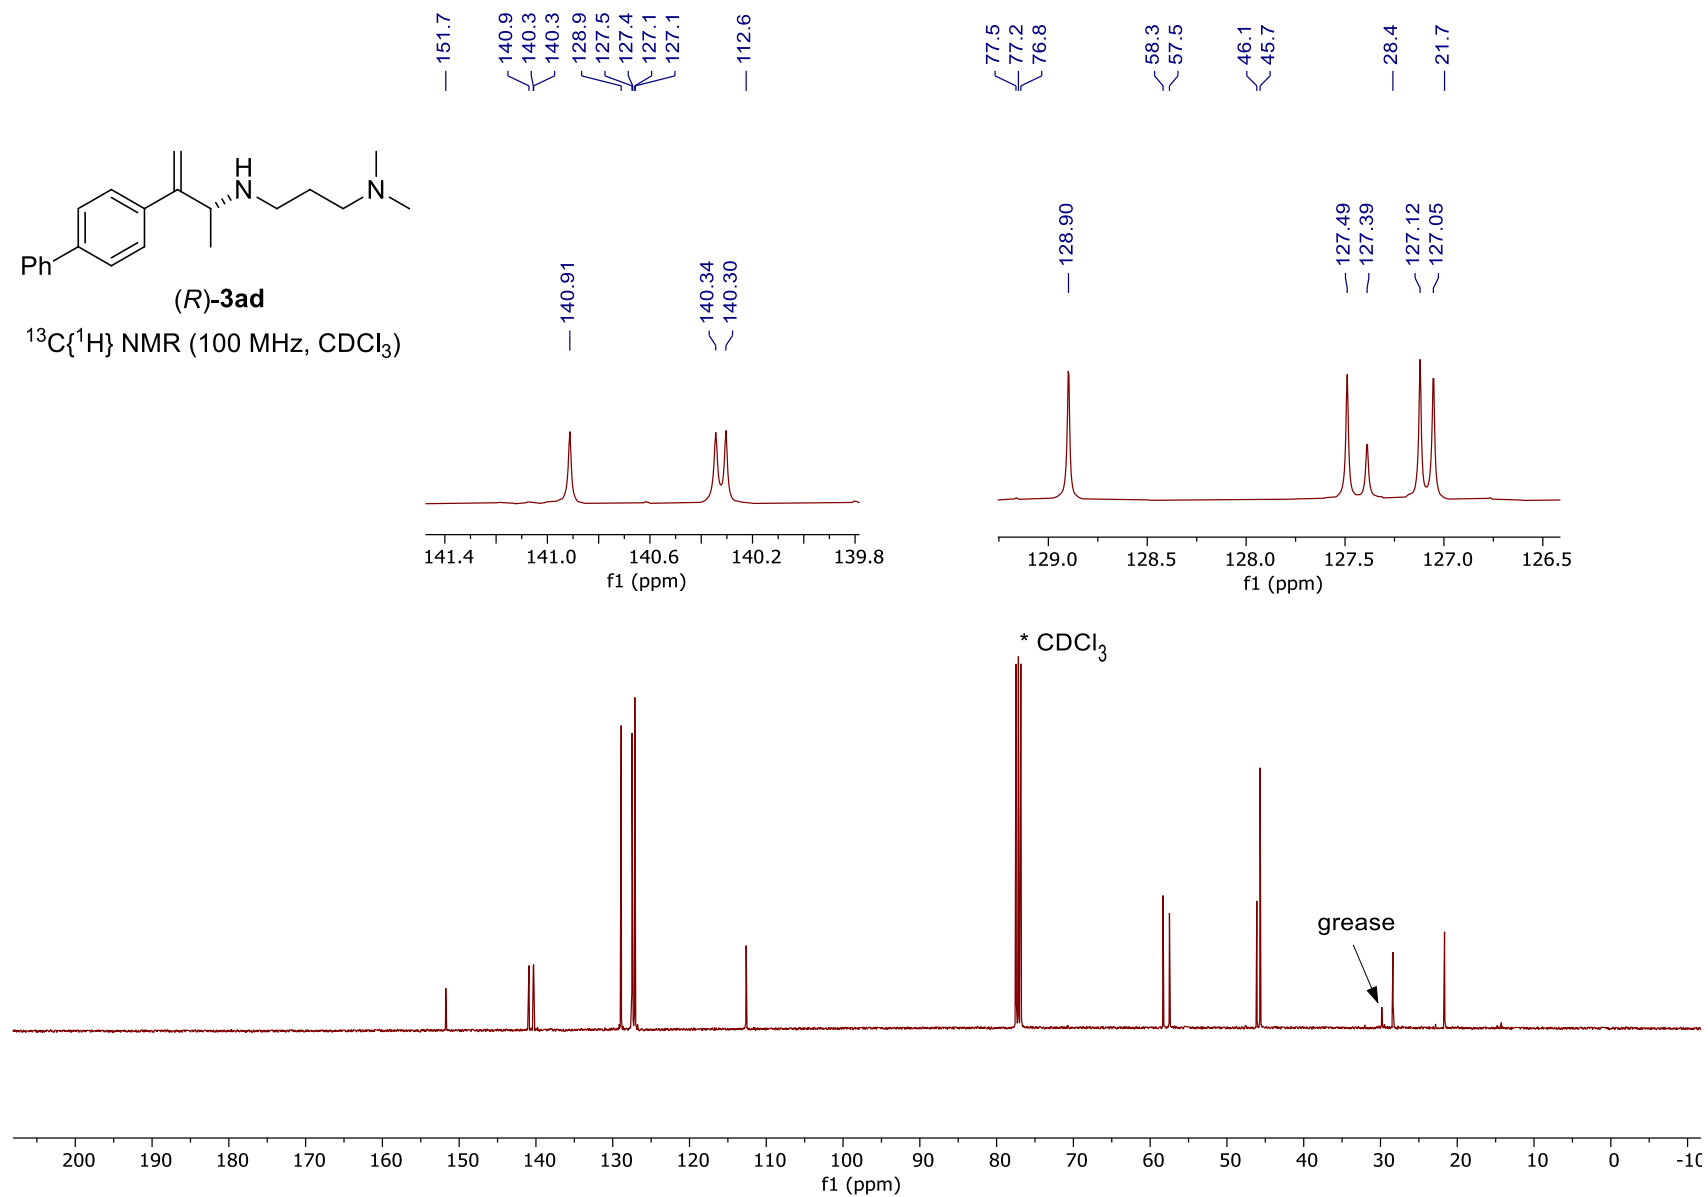

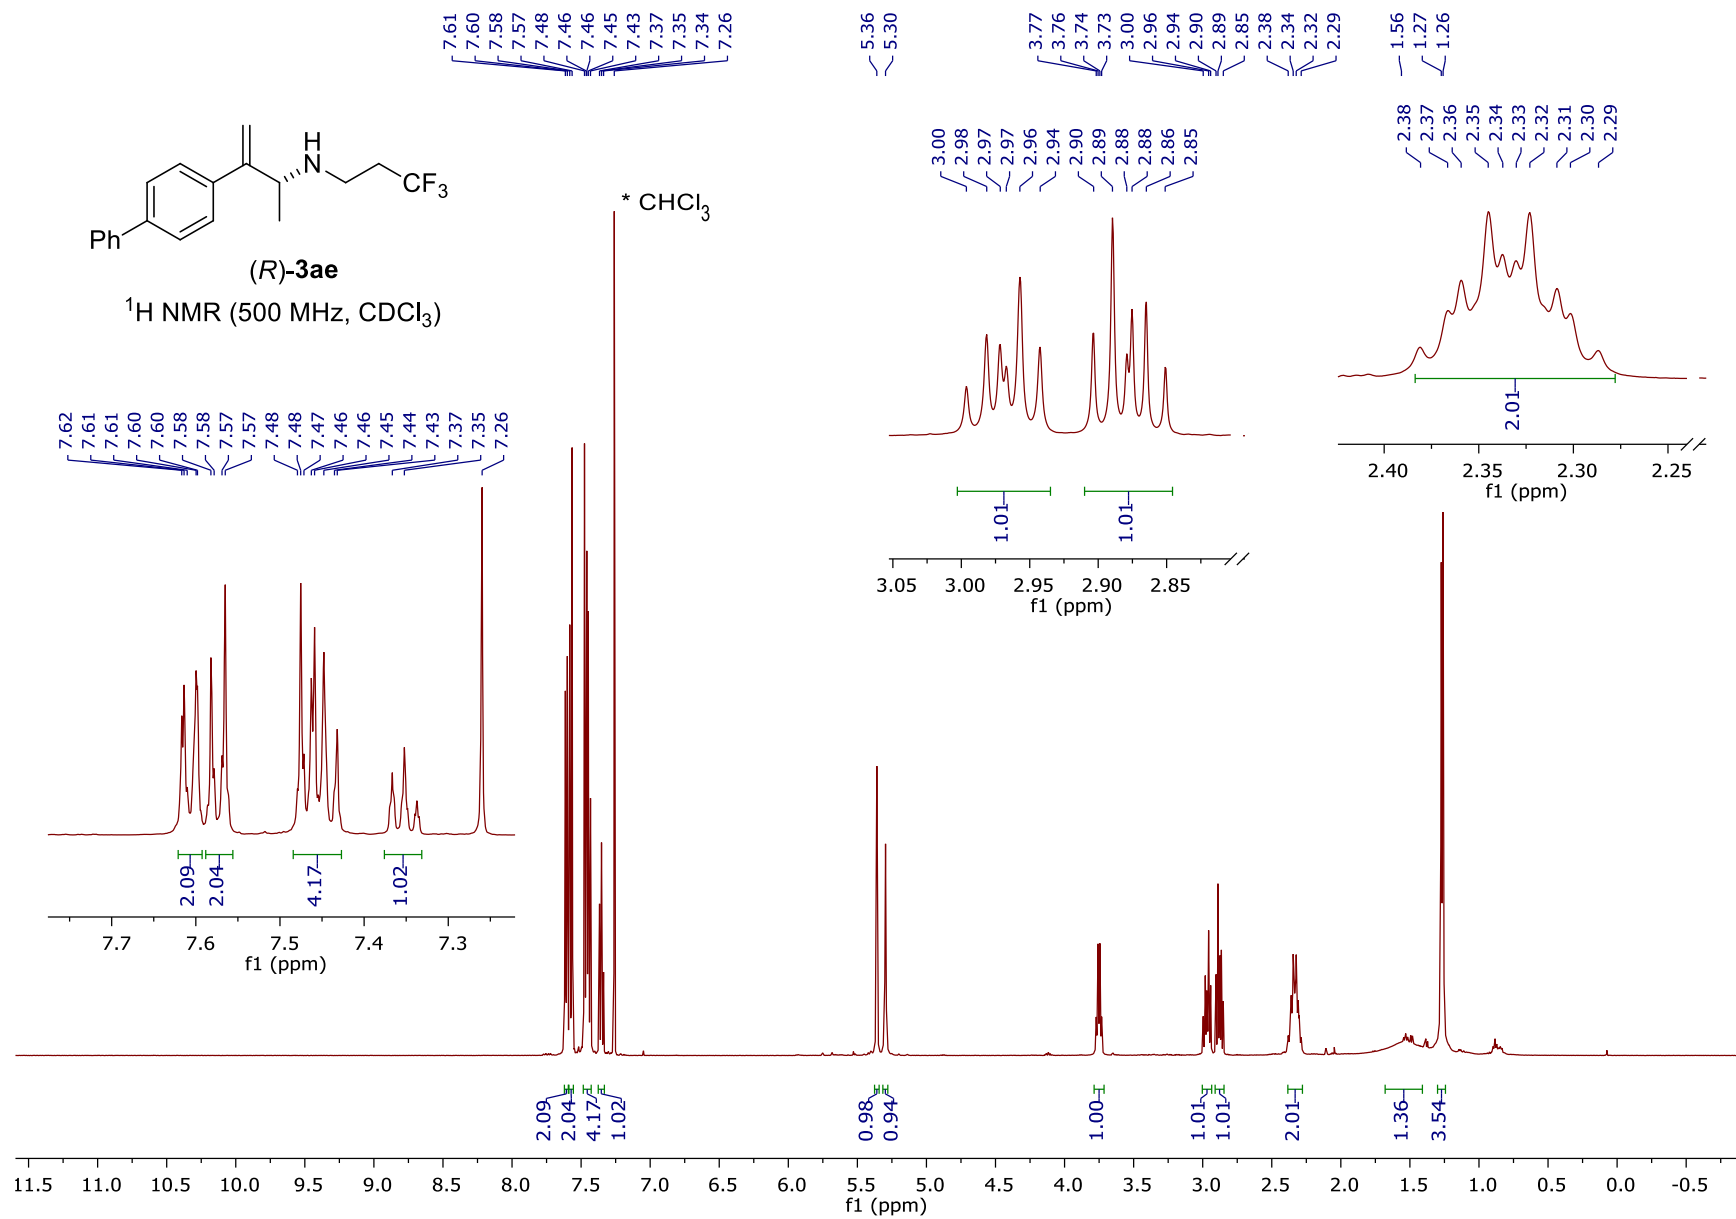

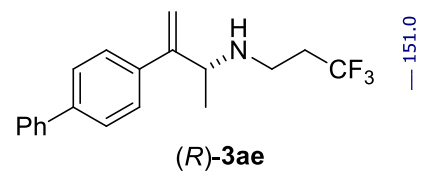

$^{13}\text{C}\{^1\text{H}\}$  NMR (130 MHz,  $\text{CDCl}_3$ )

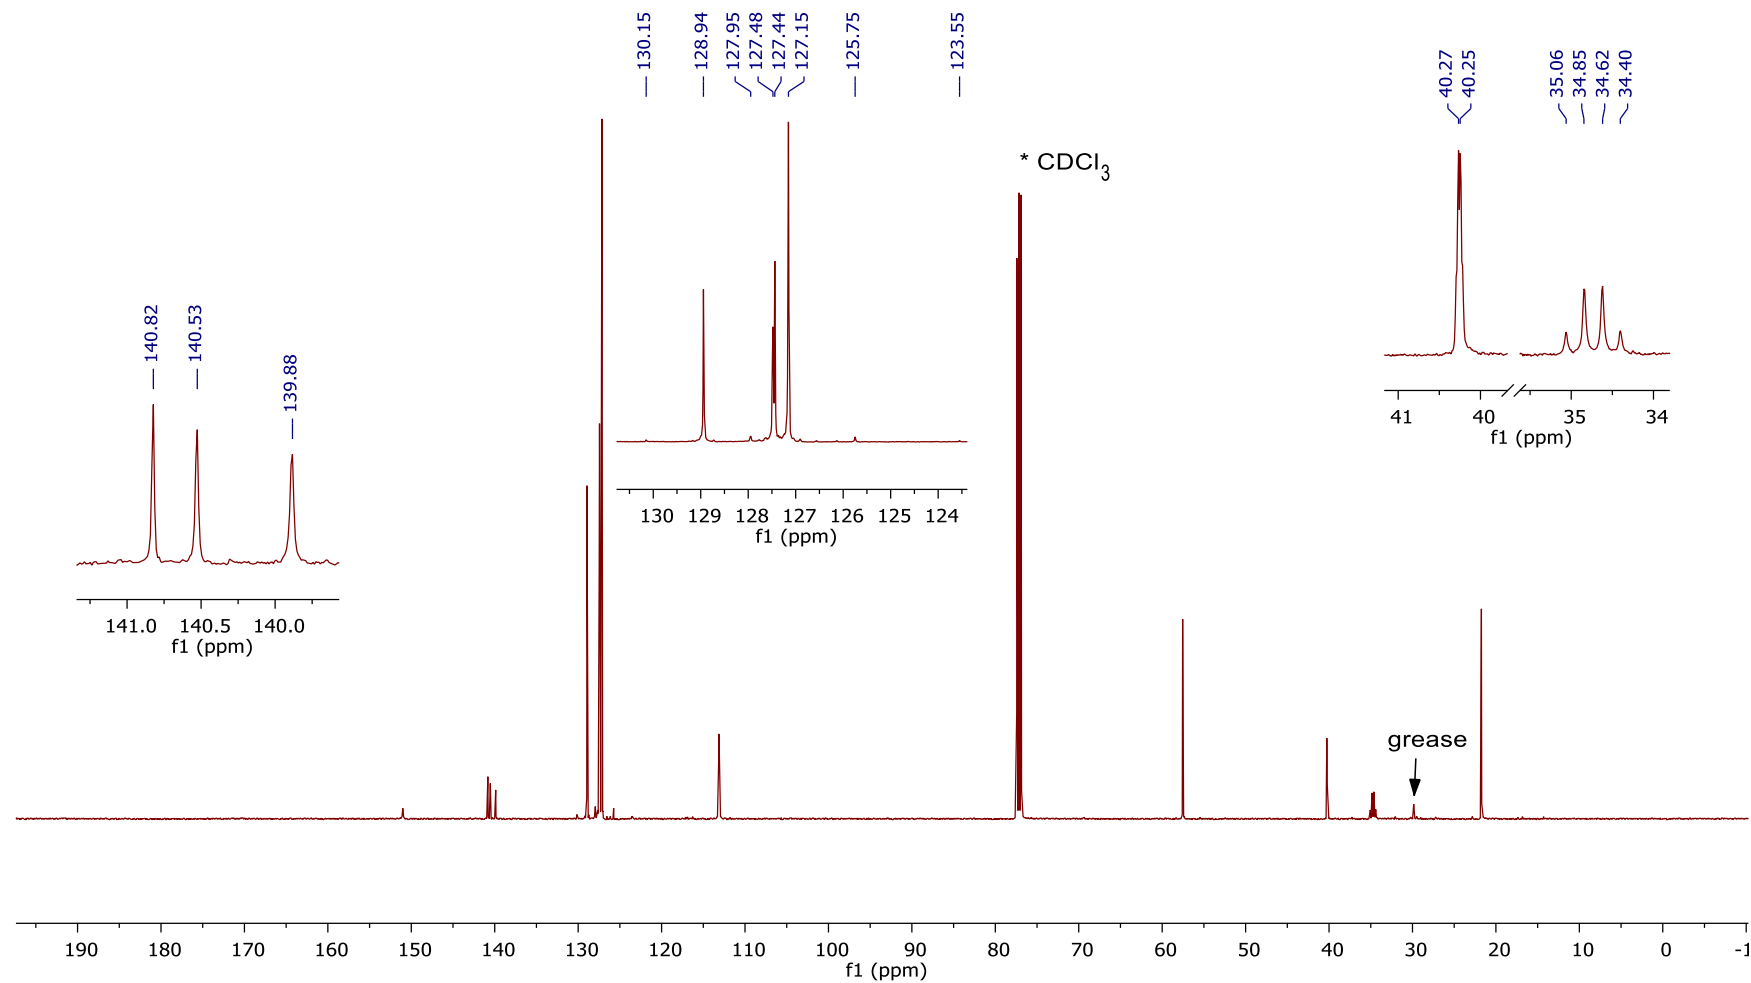

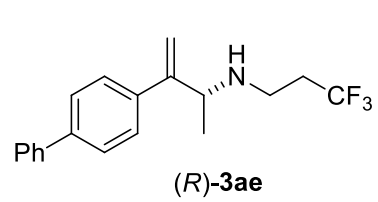

$^{19}\text{F}\{^1\text{H}\}$  NMR (280 MHz,  $\text{CDCl}_3$ )

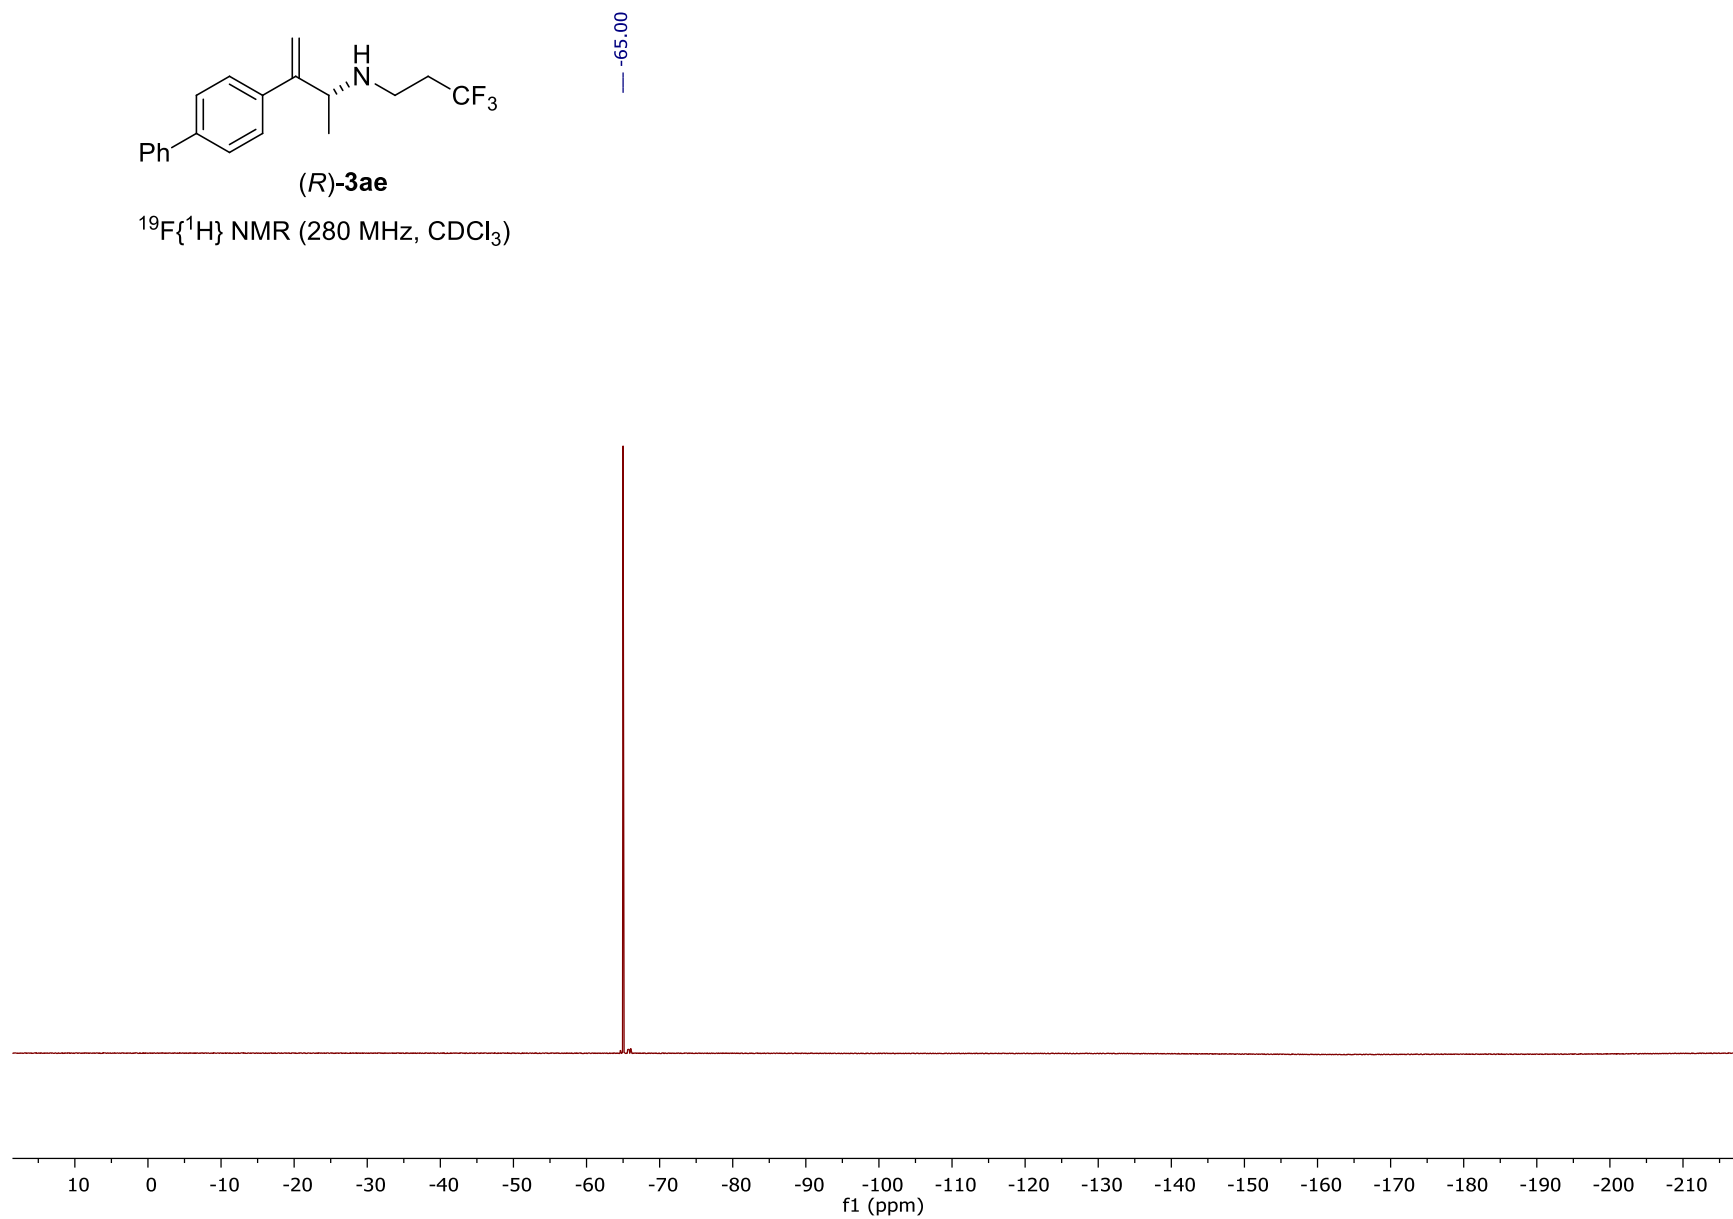

S122

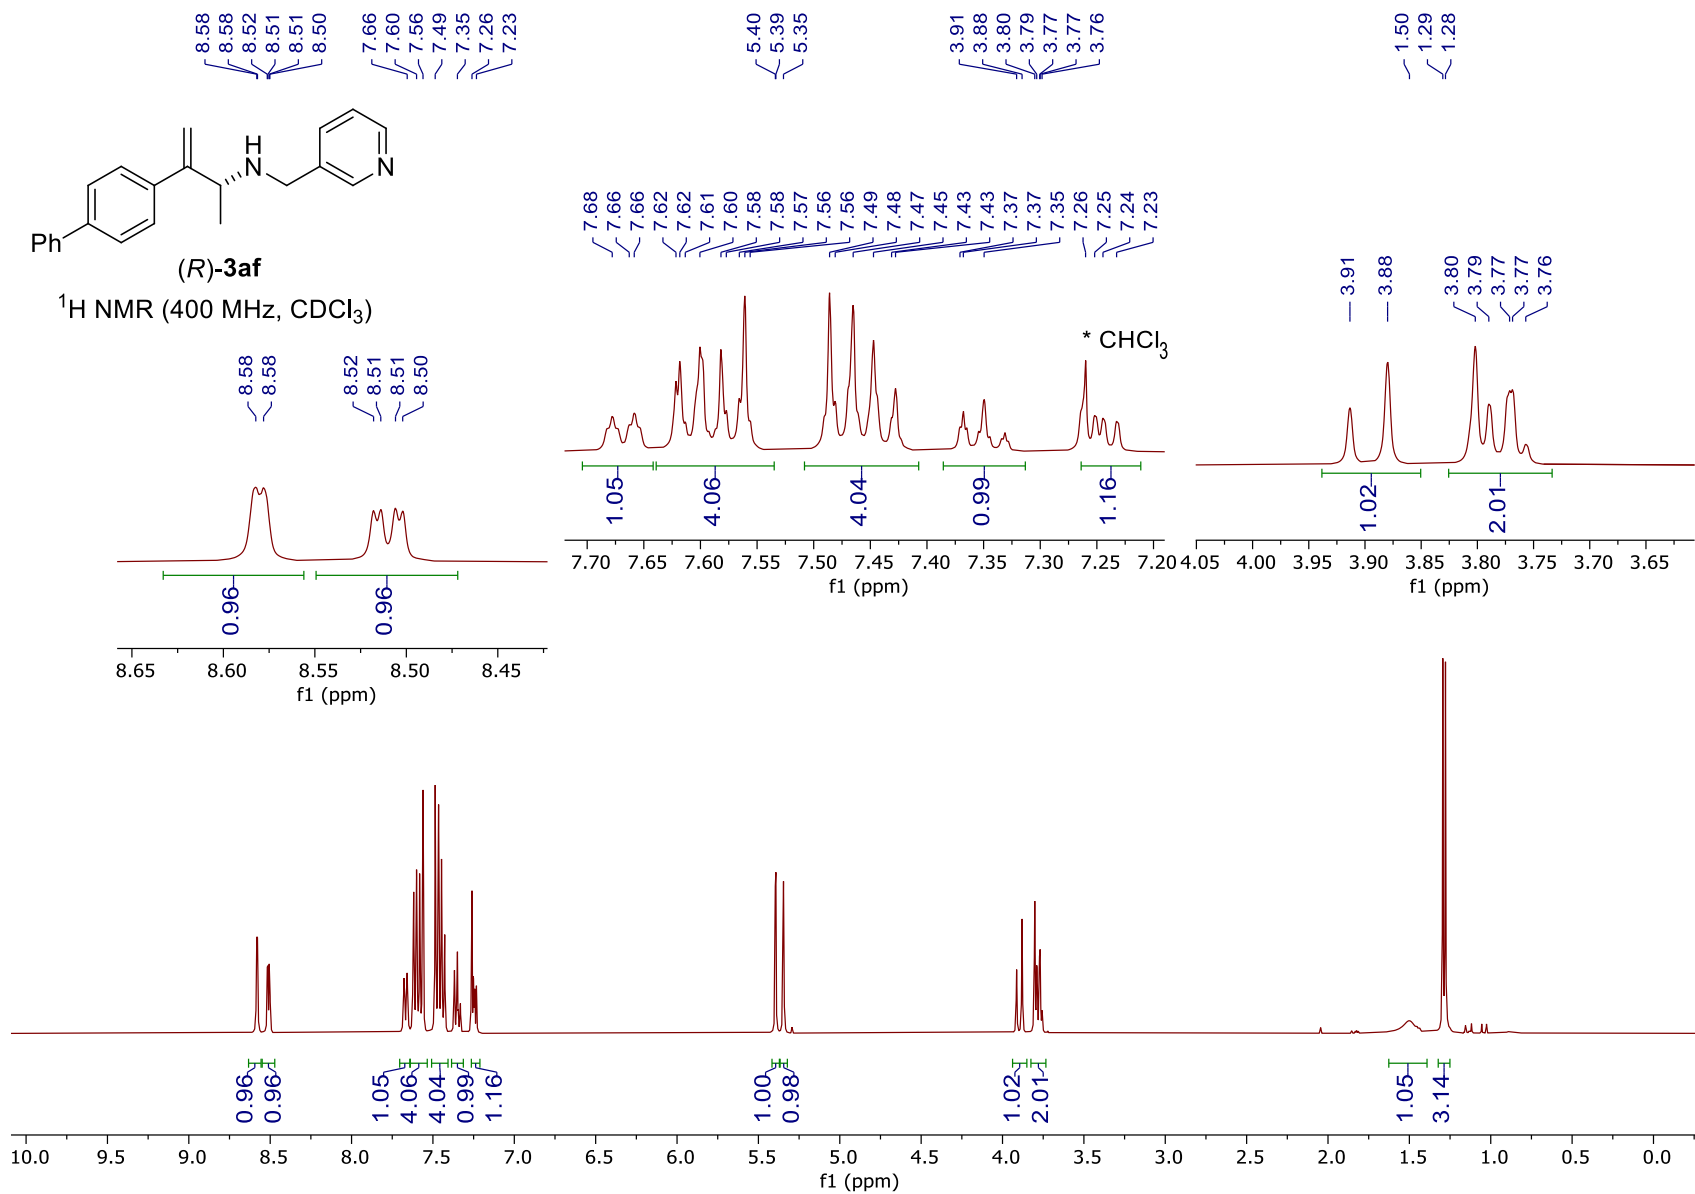

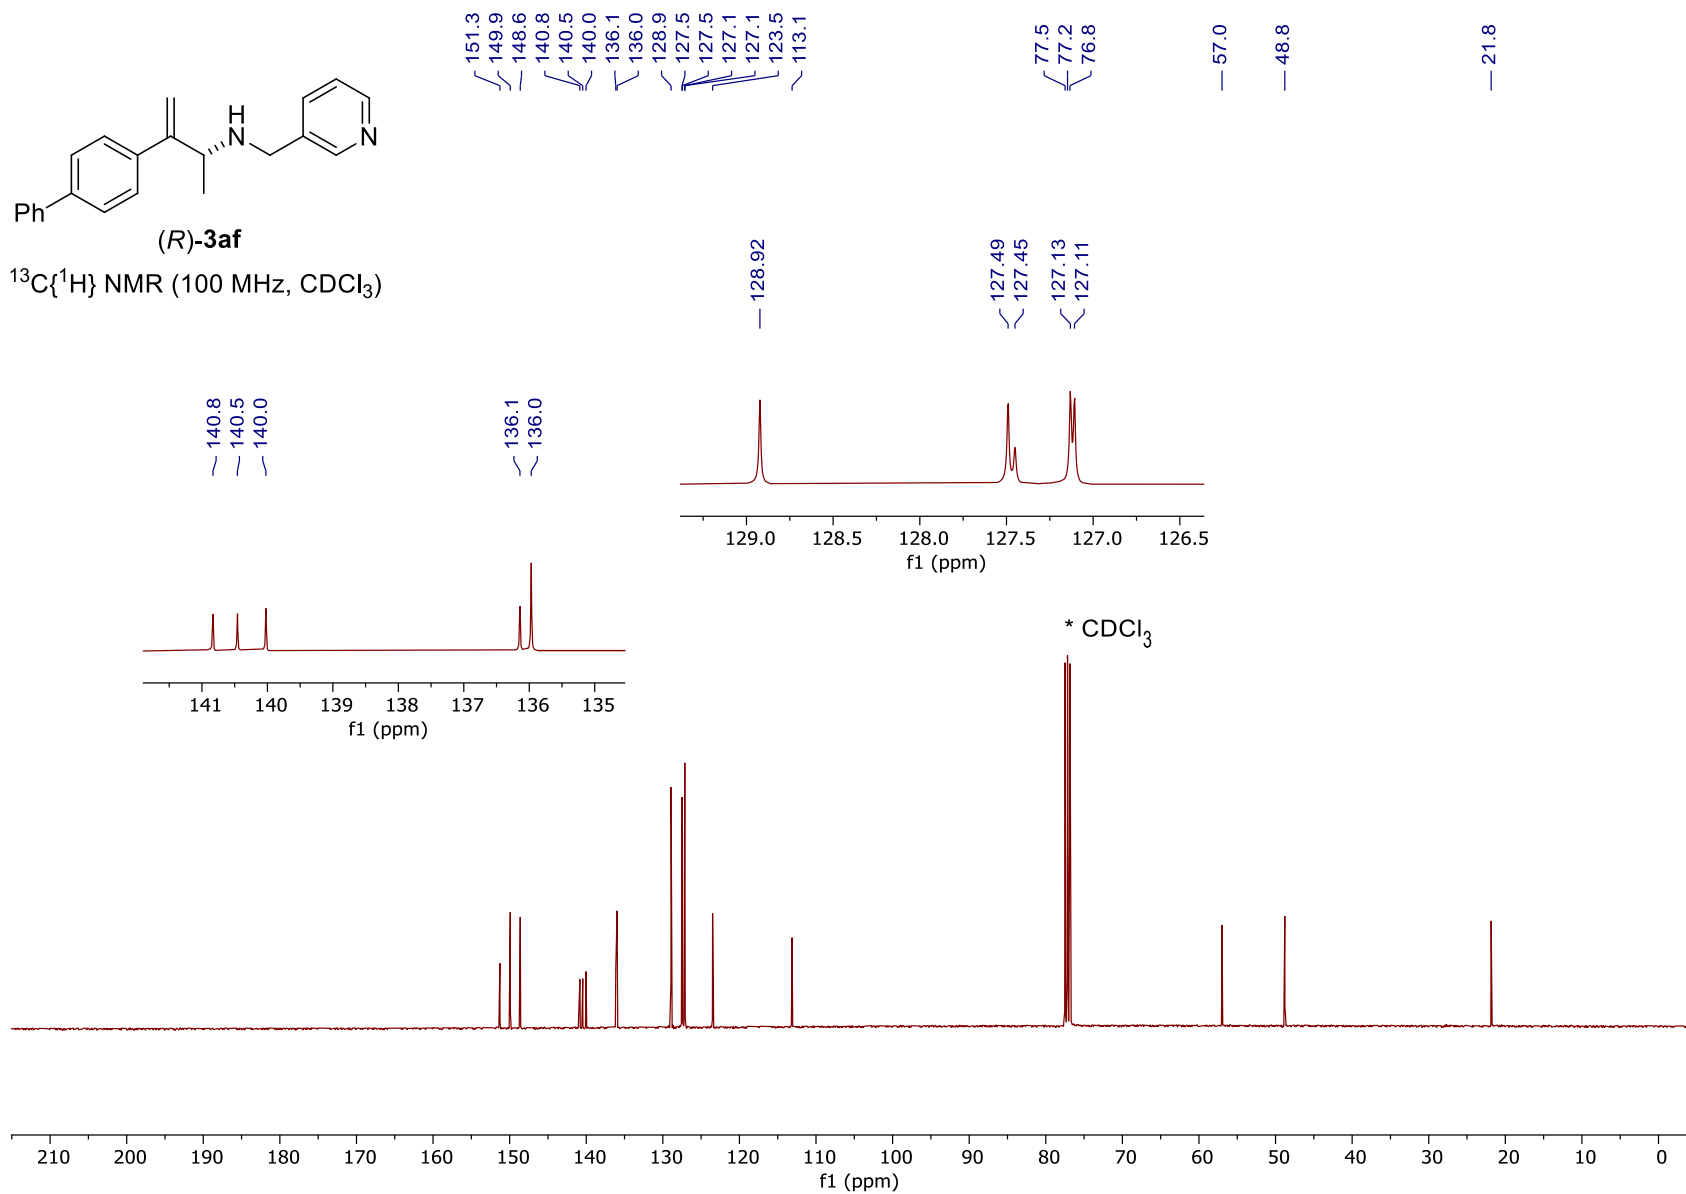



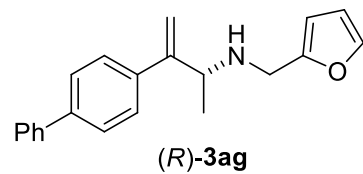

$^1\text{H}$  NMR (400 MHz,  $\text{CDCl}_3$ )

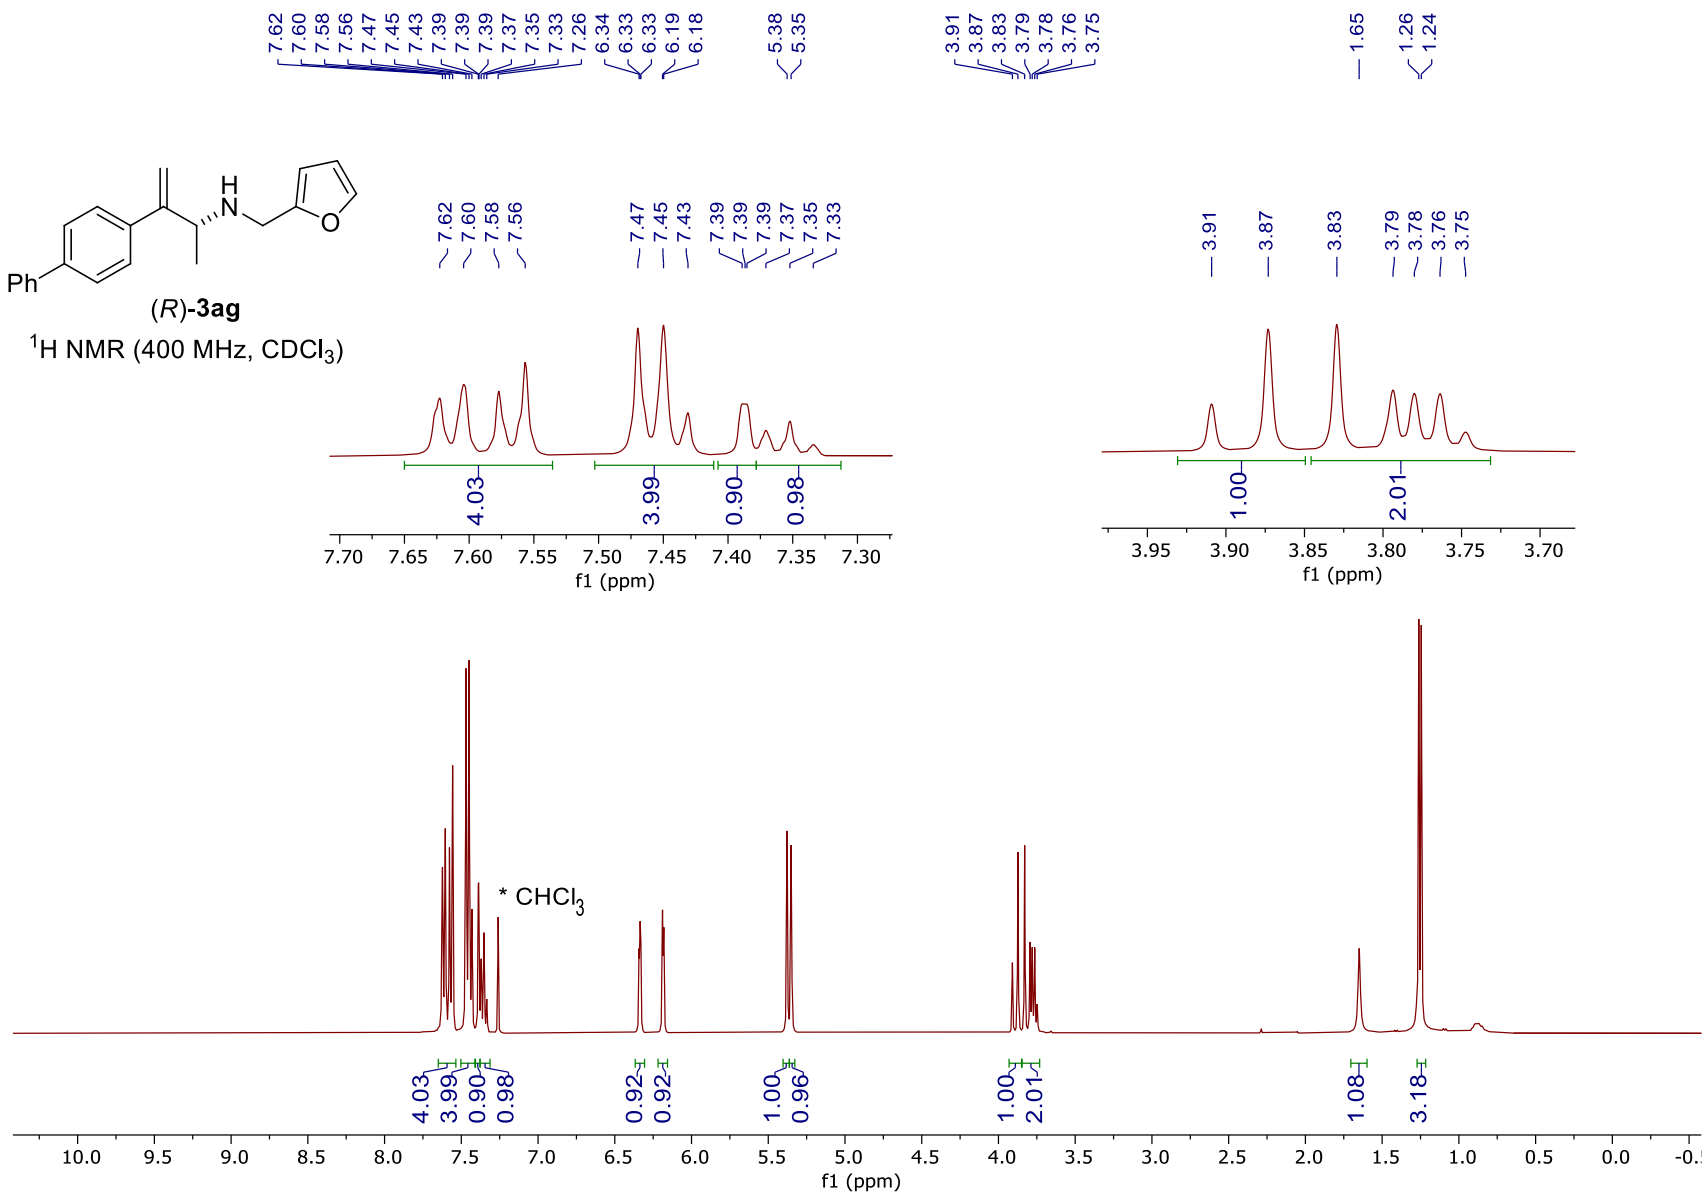

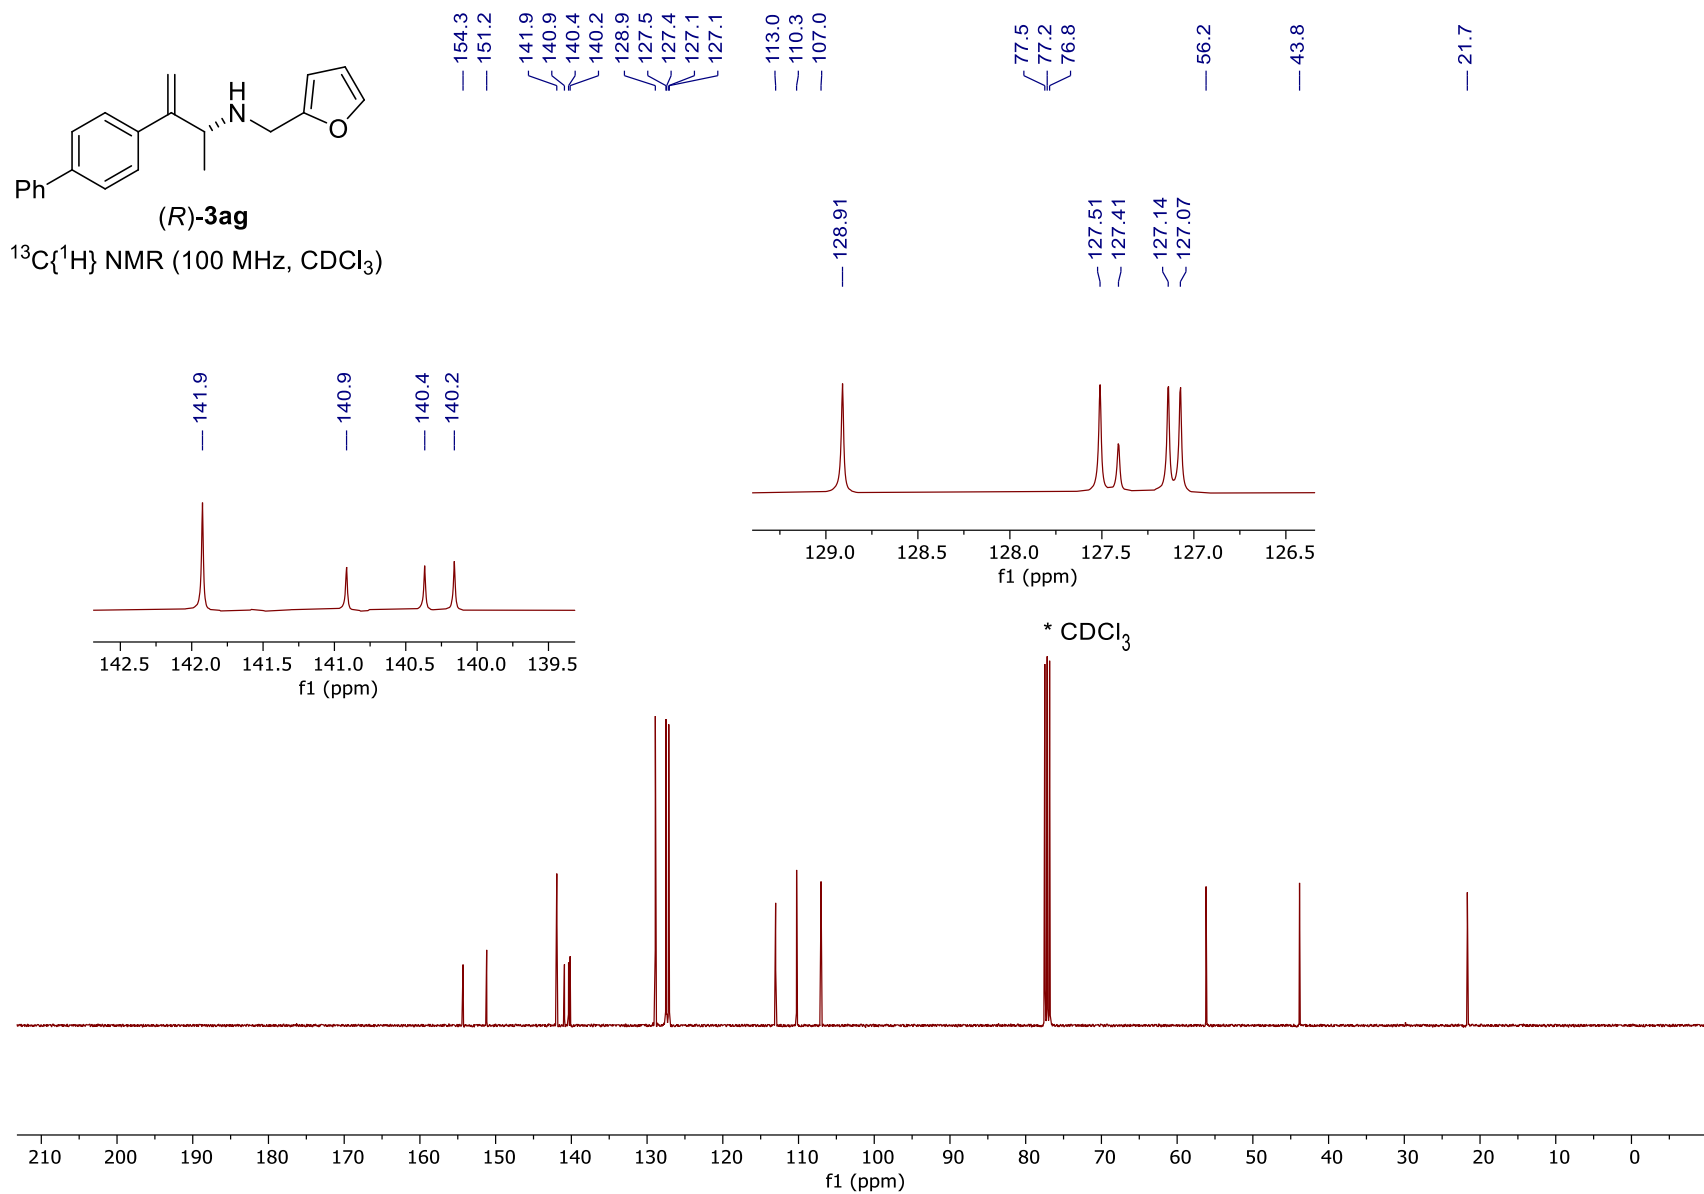

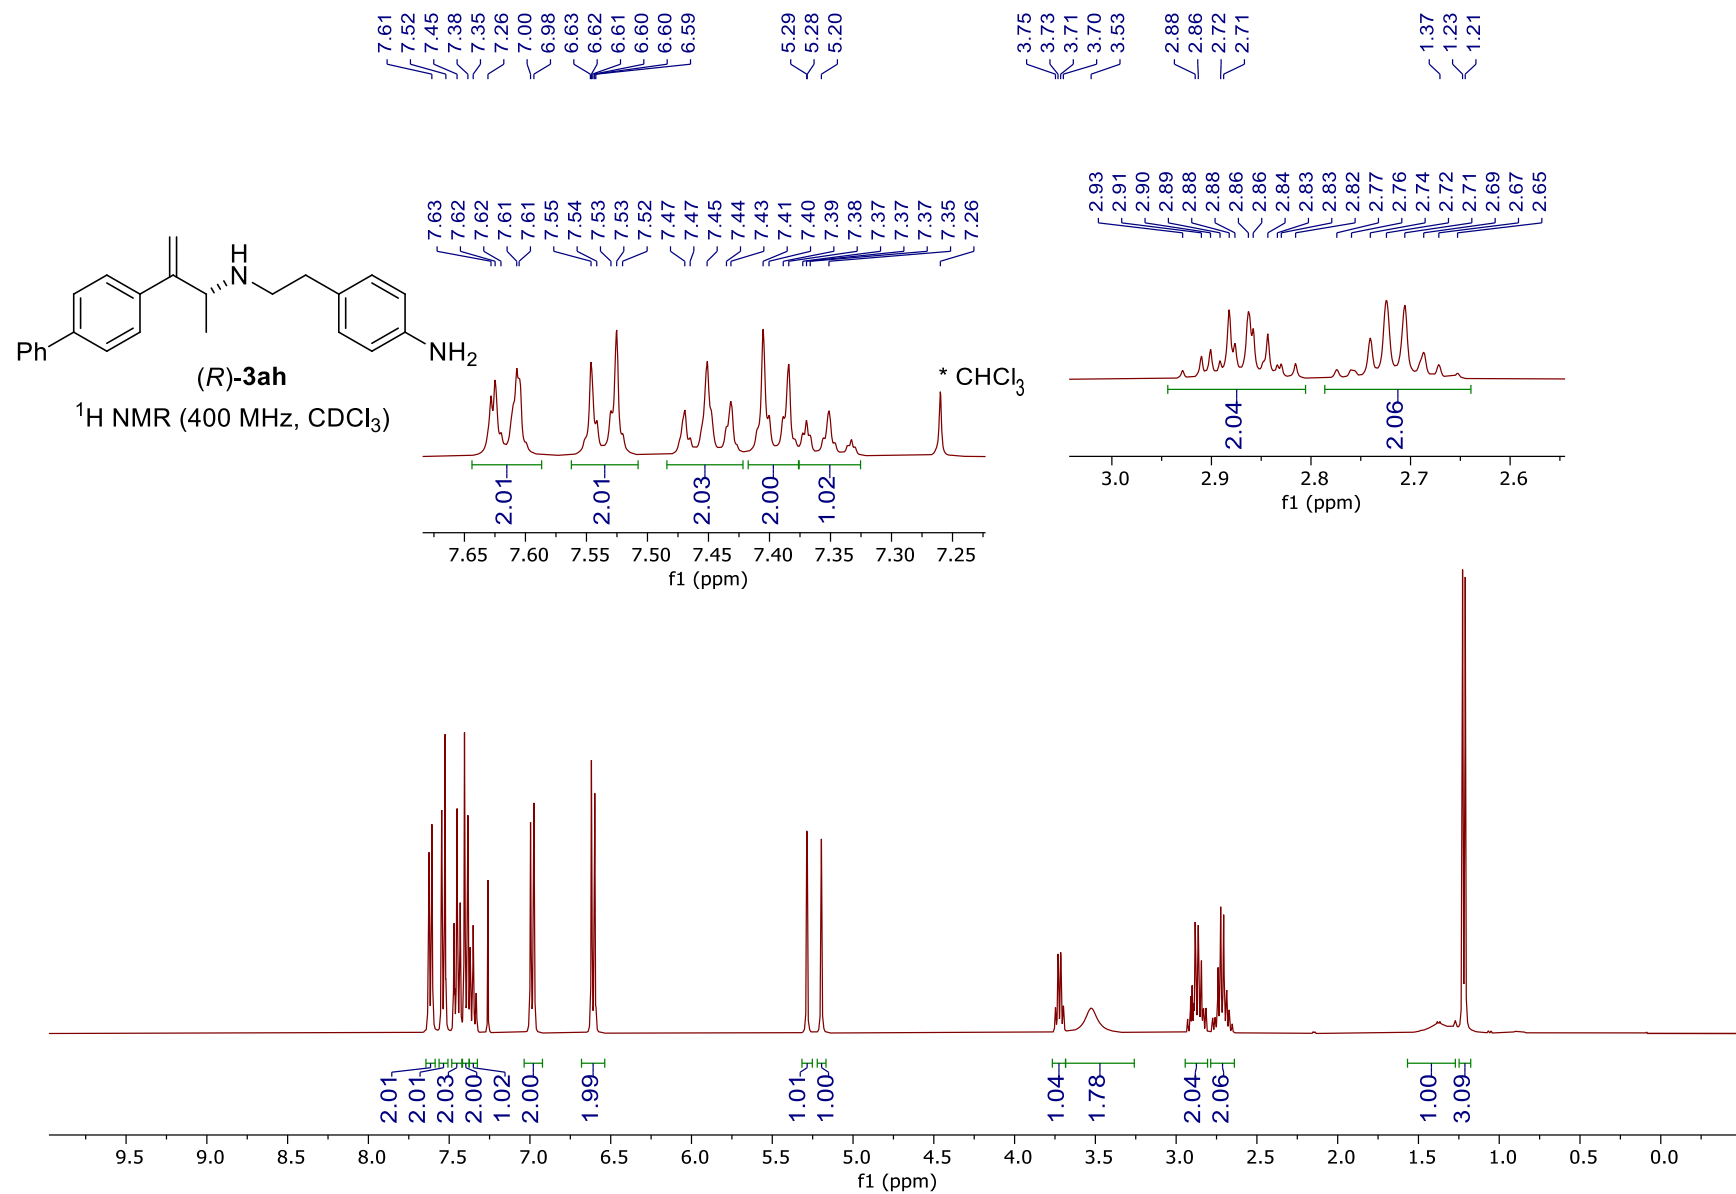

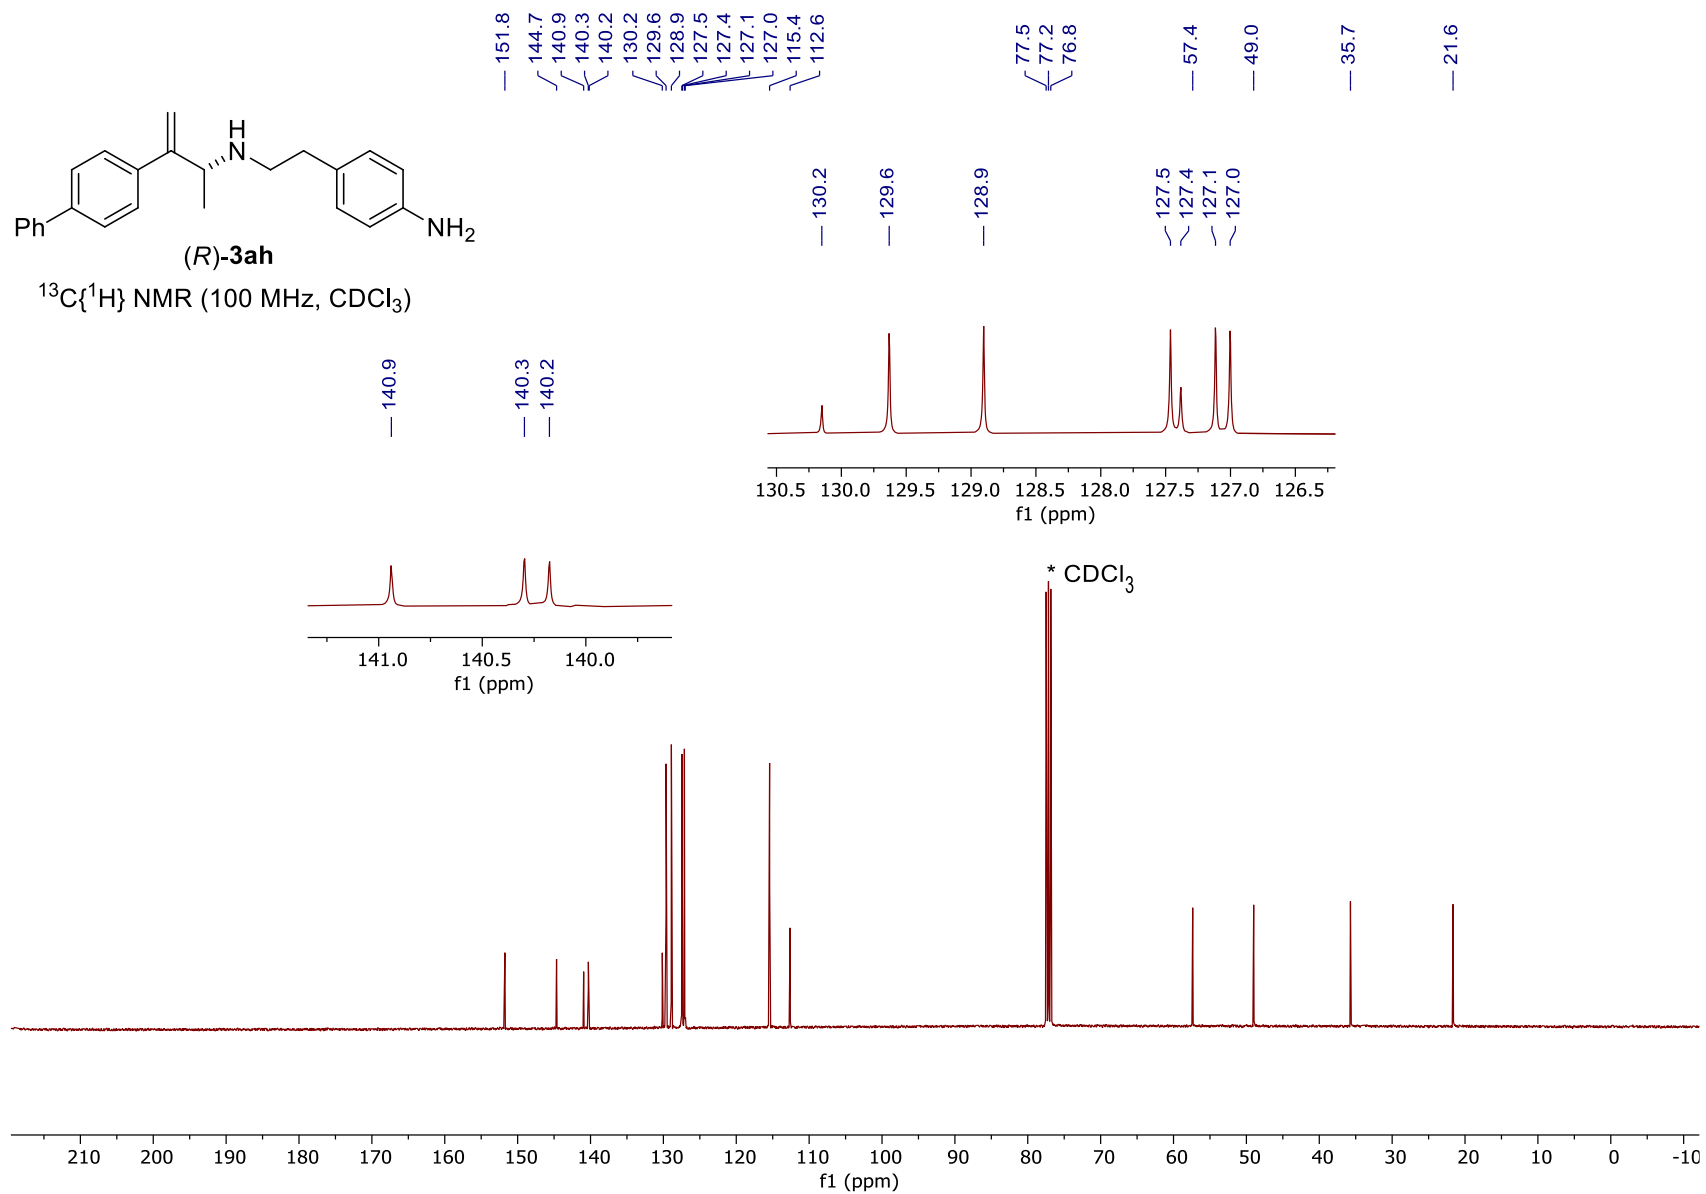

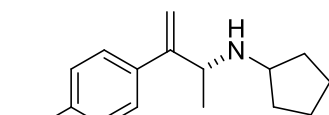

(*R*)-**3ai**

<sup>1</sup>H NMR (400 MHz, CDCl<sub>3</sub>)

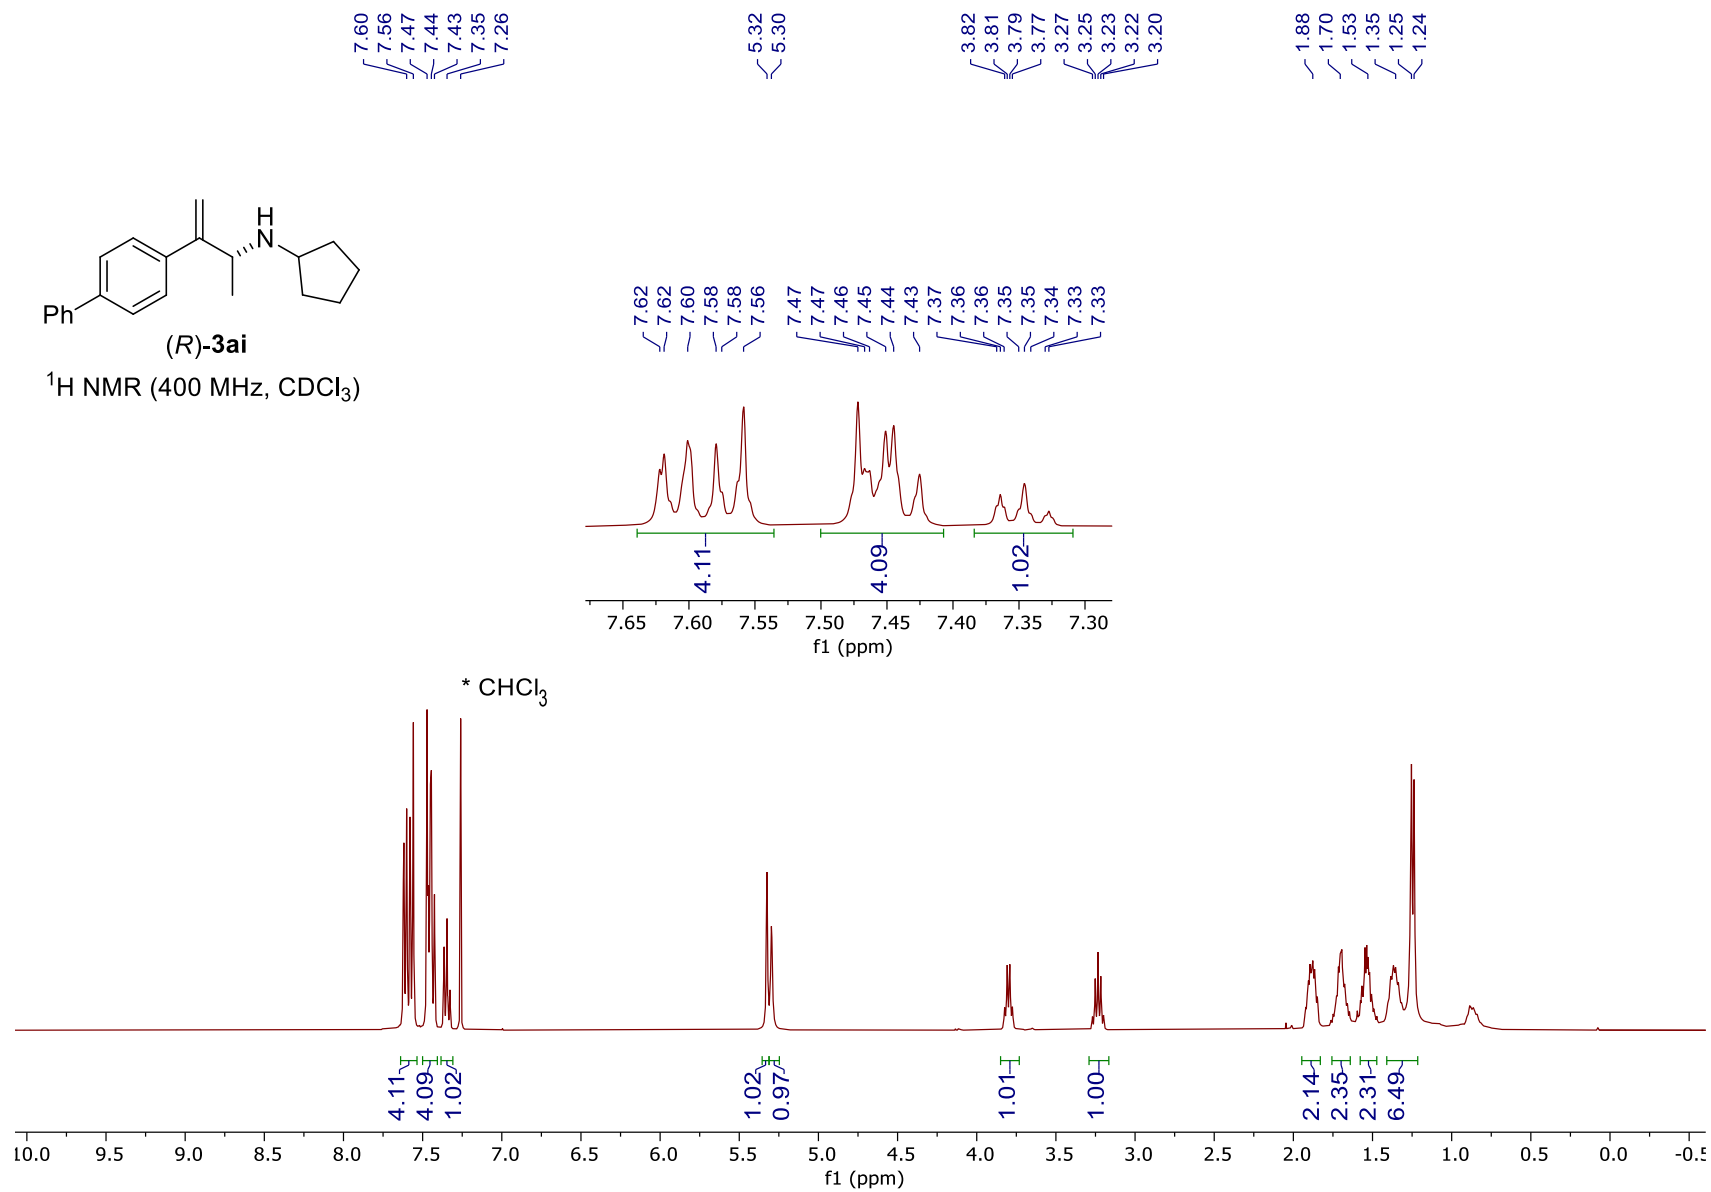

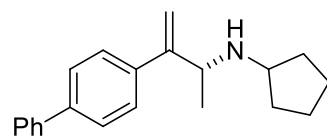

(*R*)-3ai

$^{13}\text{C}\{^1\text{H}\}$  NMR (100 MHz,  $\text{CDCl}_3$ )

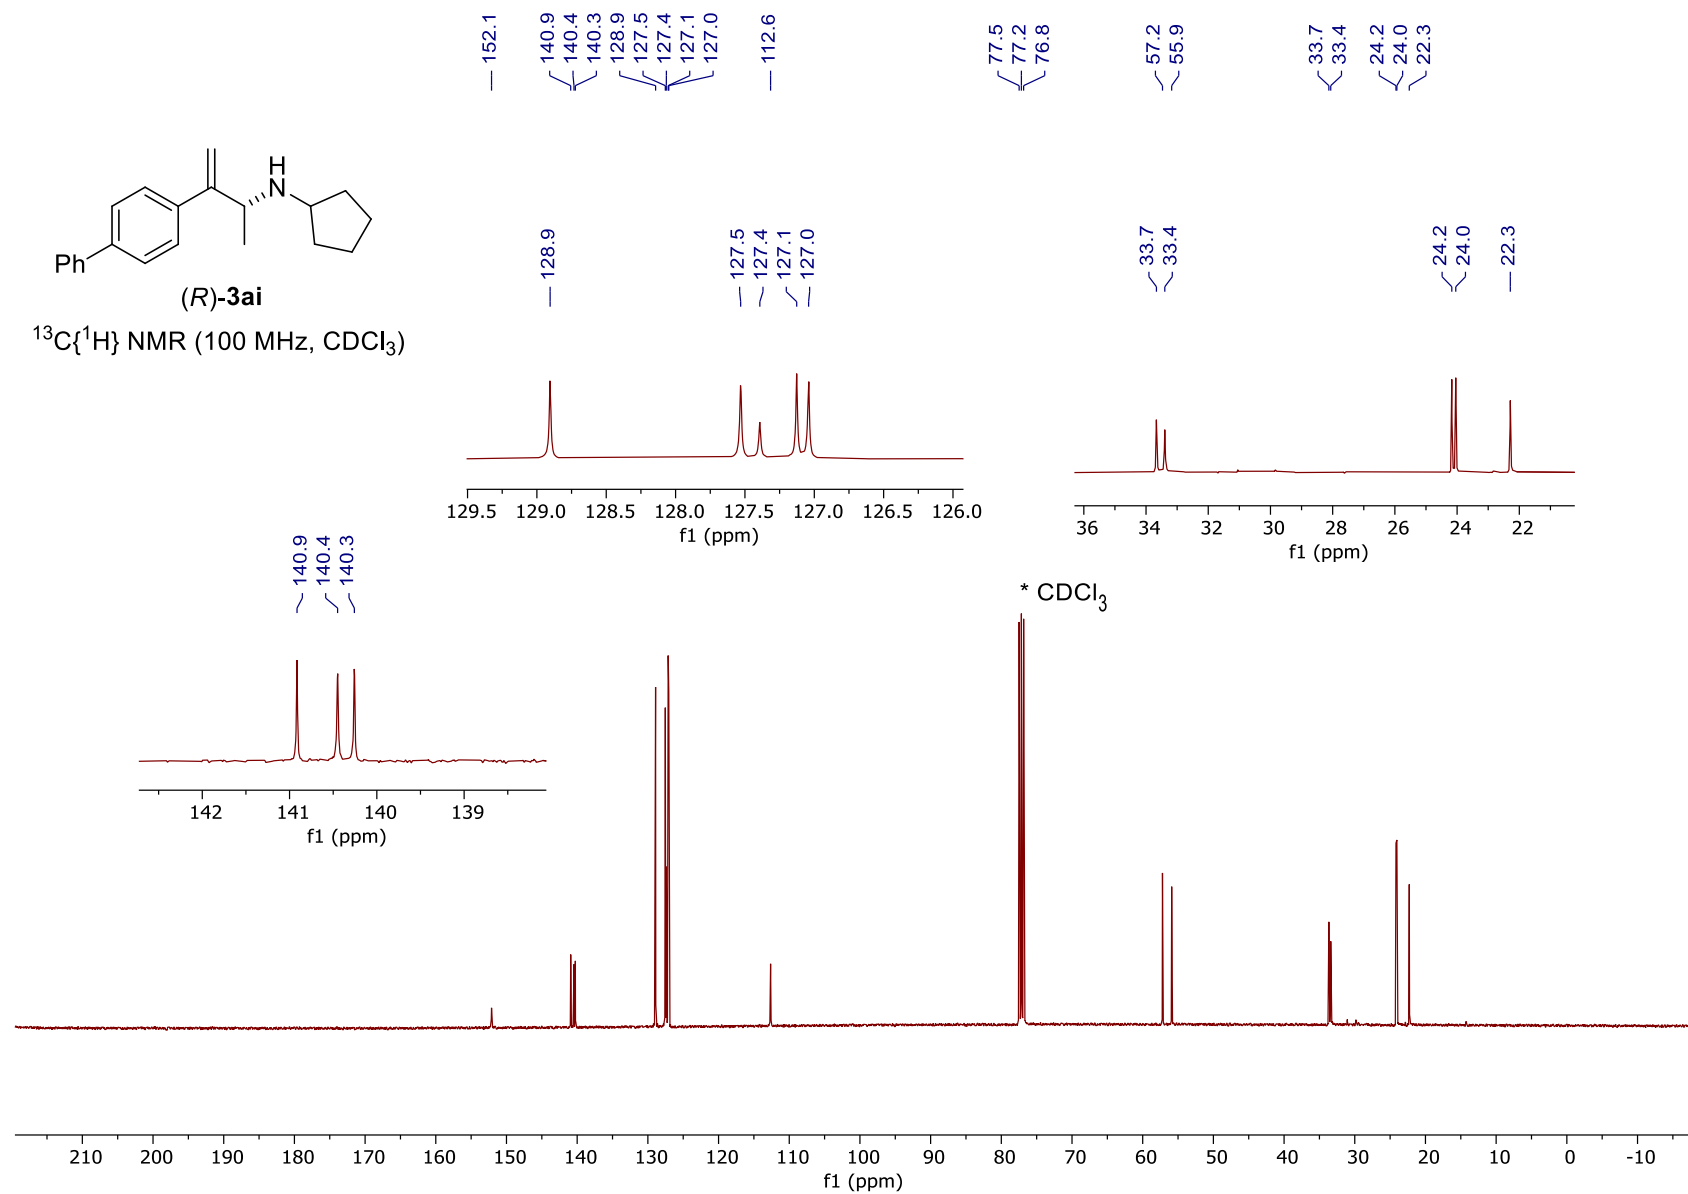

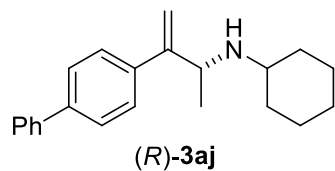

<sup>1</sup>H NMR (400 MHz, CDCl<sub>3</sub>)

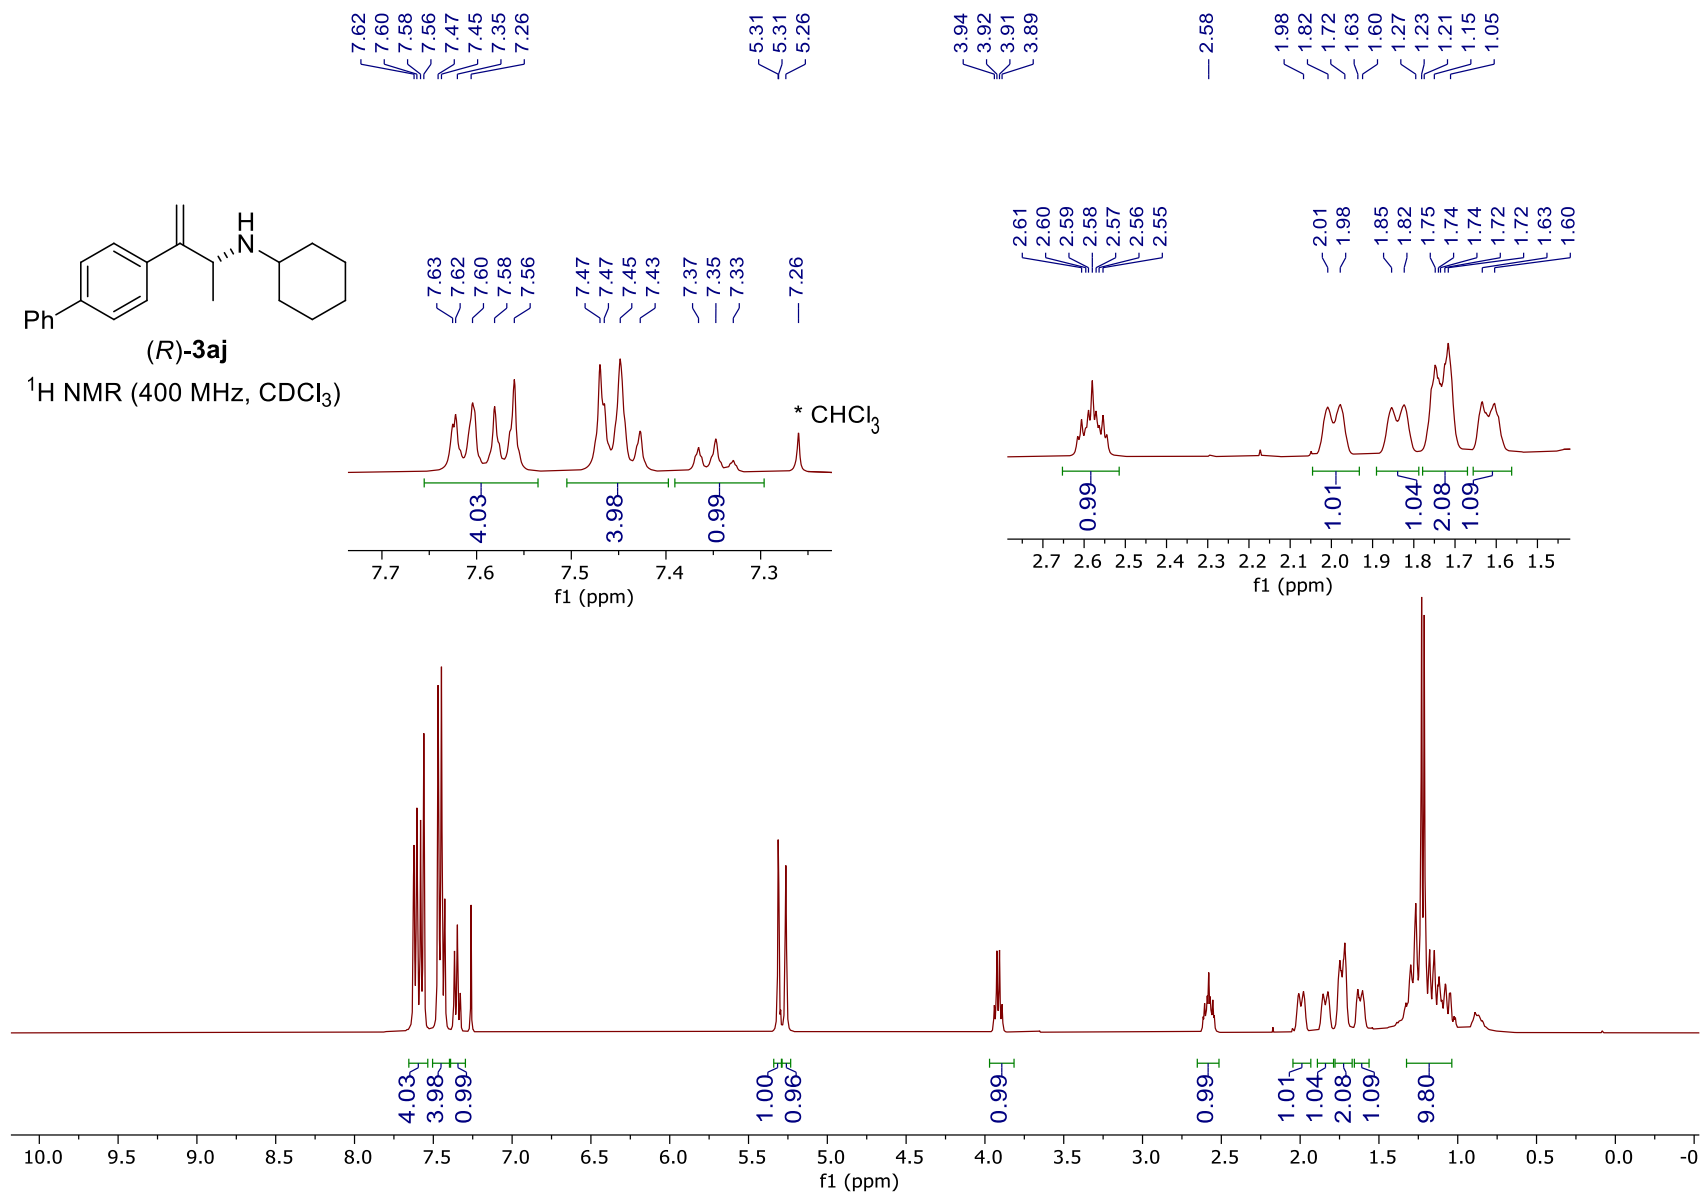

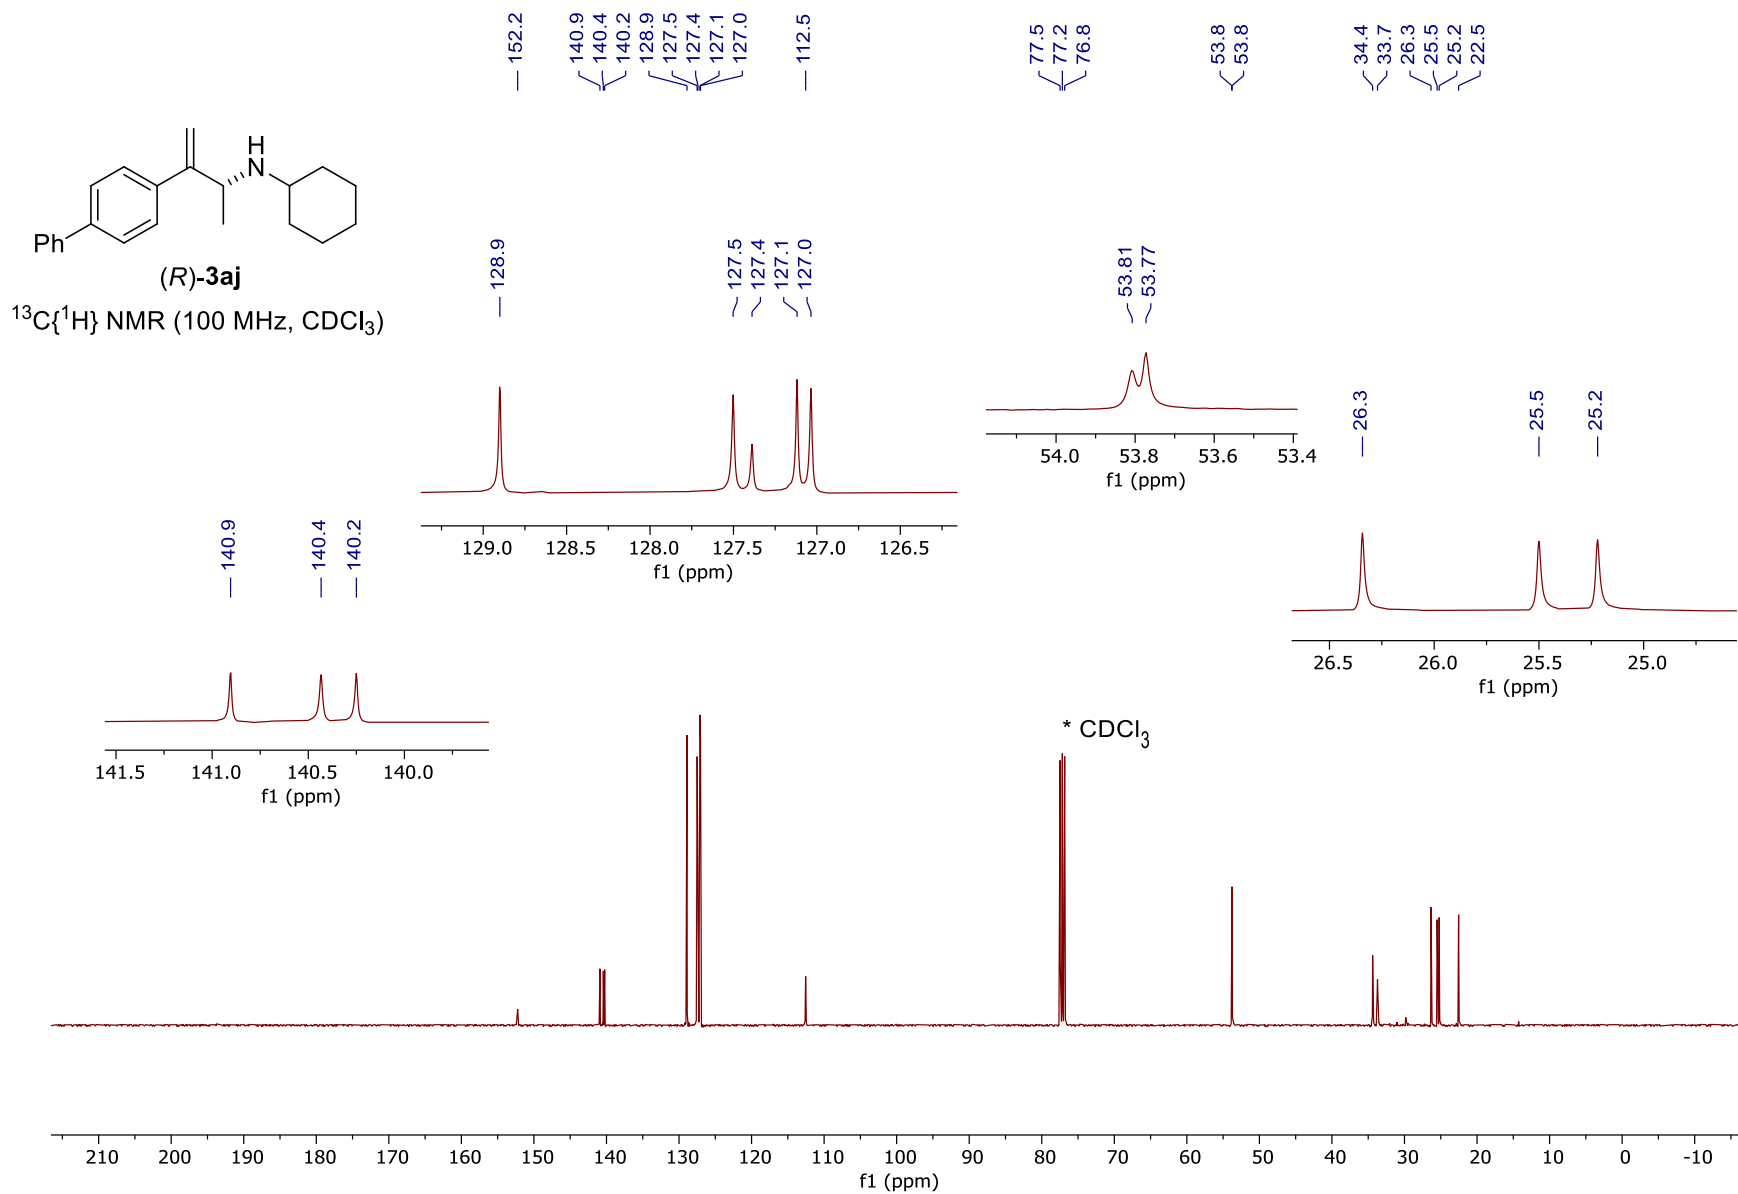



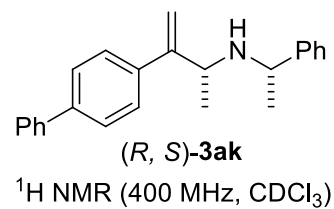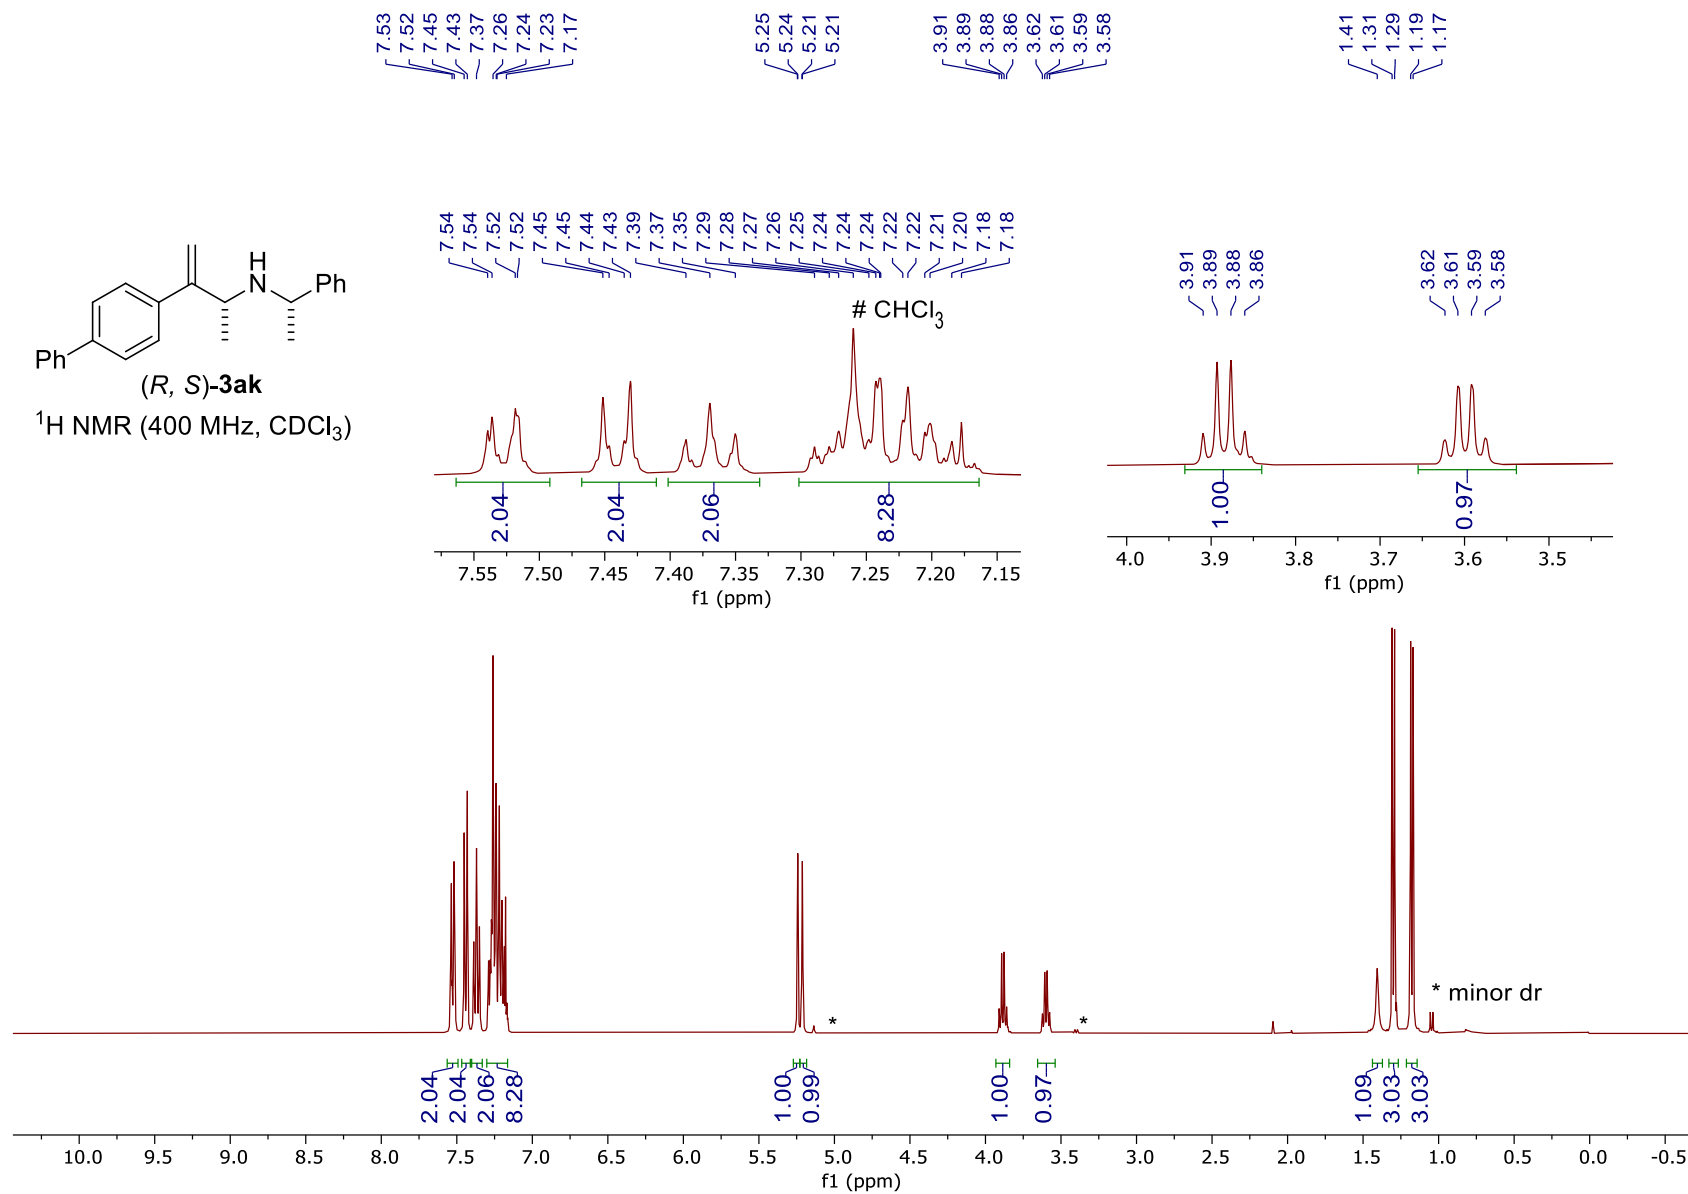

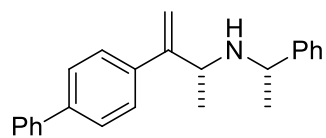

(*R*, *S*)-**3ak**

$^{13}\text{C}\{^1\text{H}\}$  NMR (100 MHz,  $\text{CDCl}_3$ )

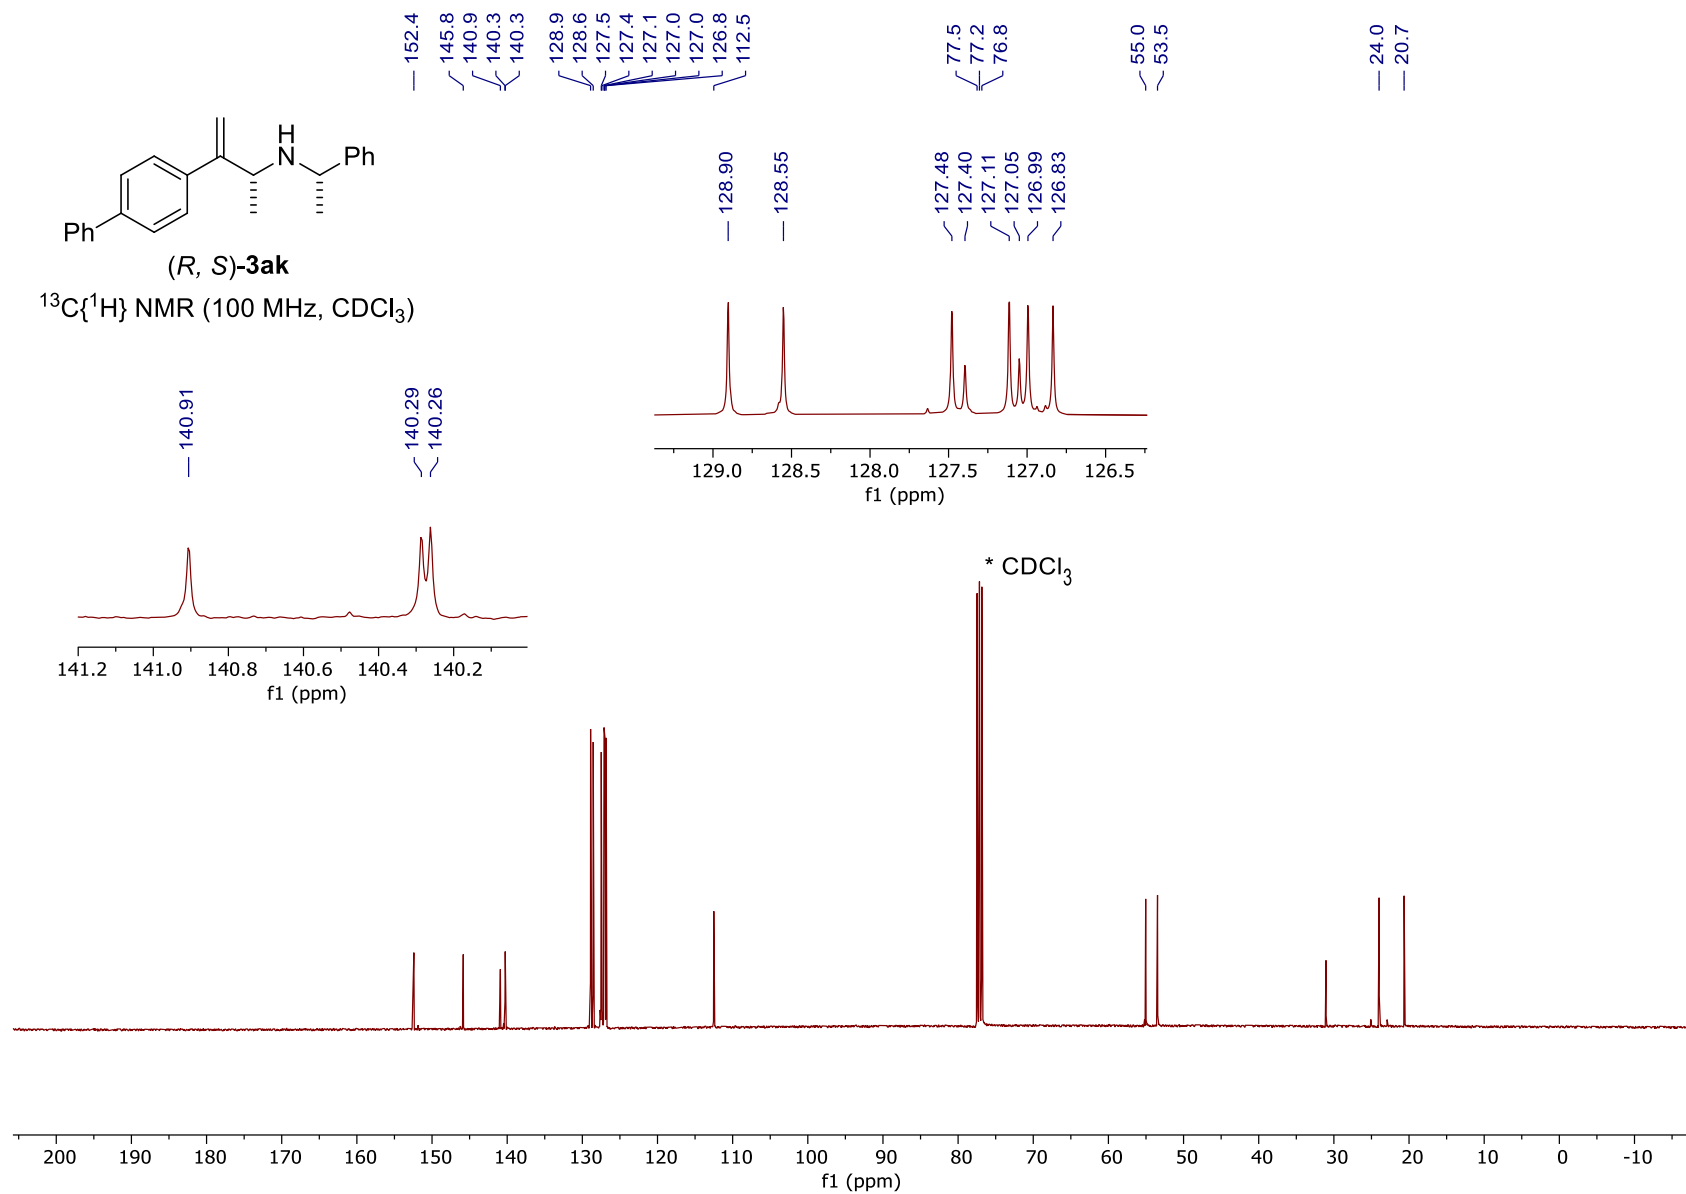

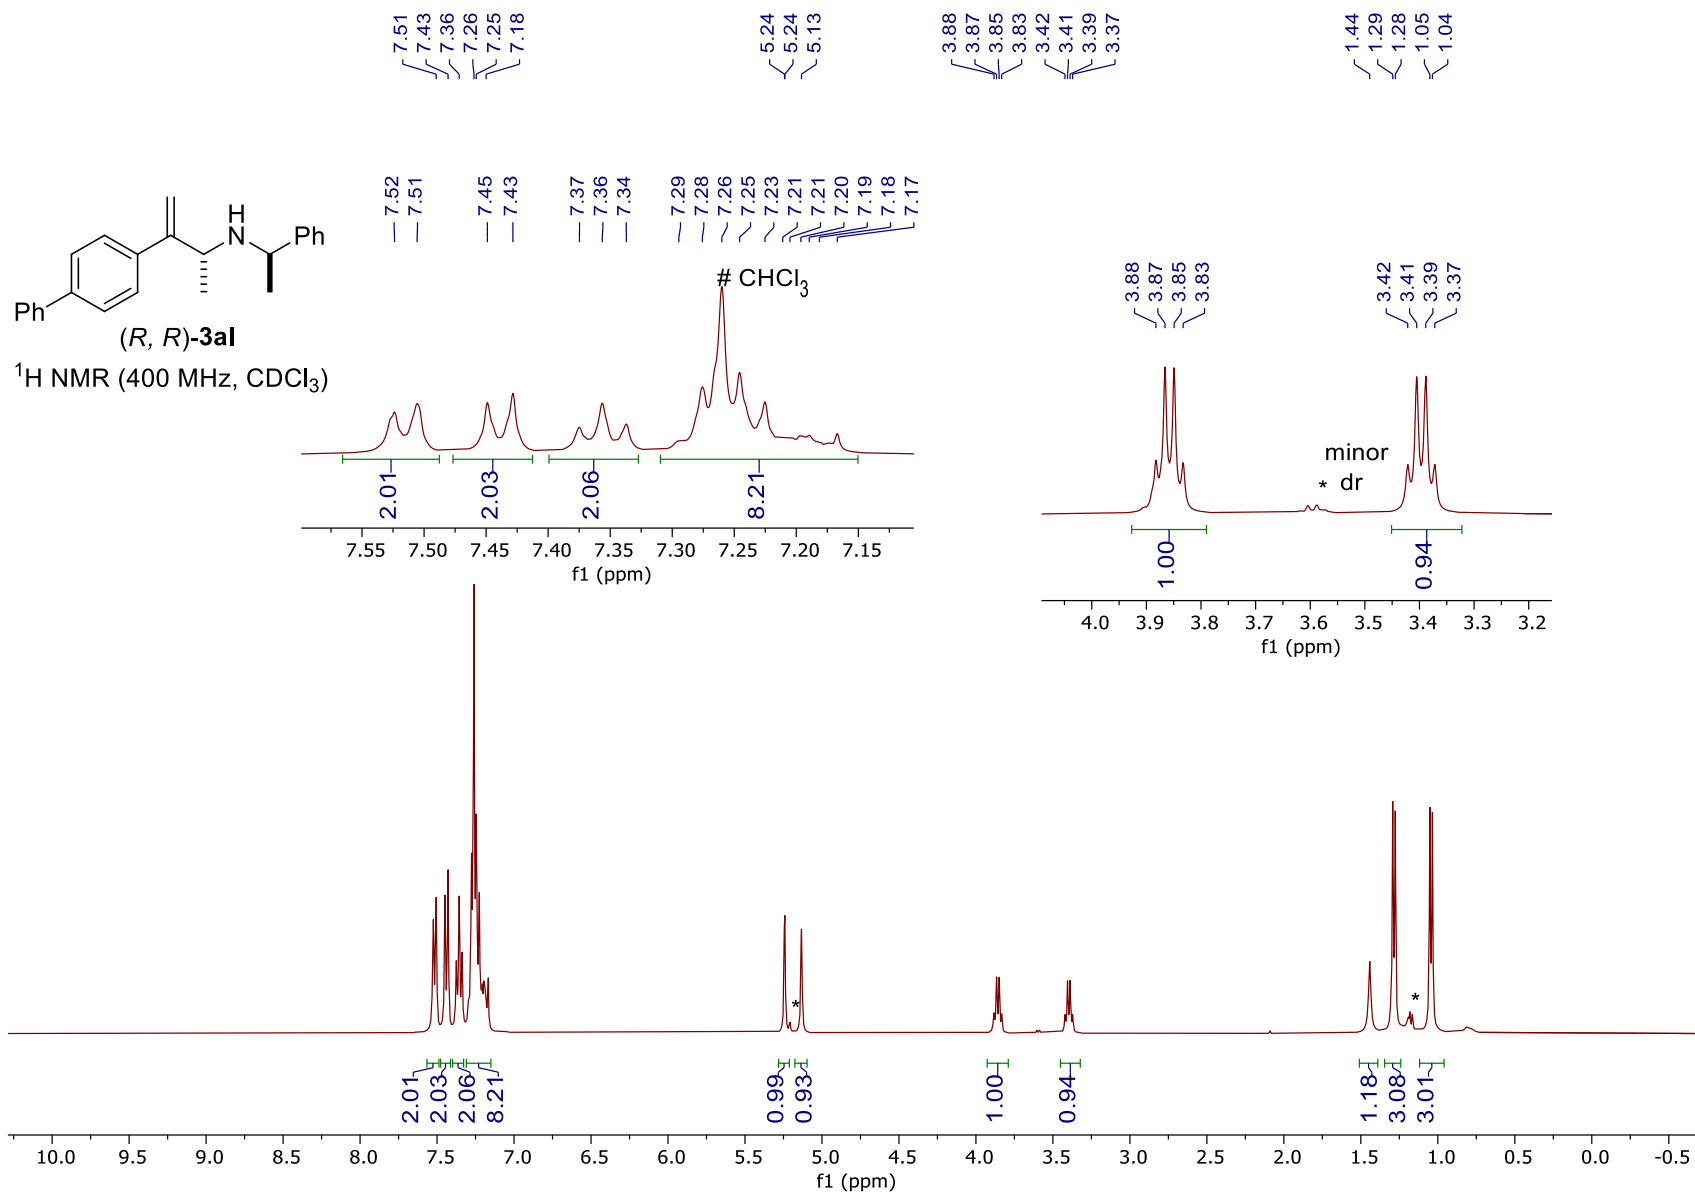

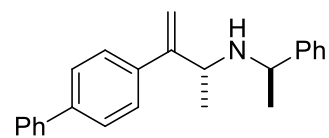

(*R, R*)-**3al**

$^{13}\text{C}\{^1\text{H}\}$  NMR (100 MHz,  $\text{CDCl}_3$ )

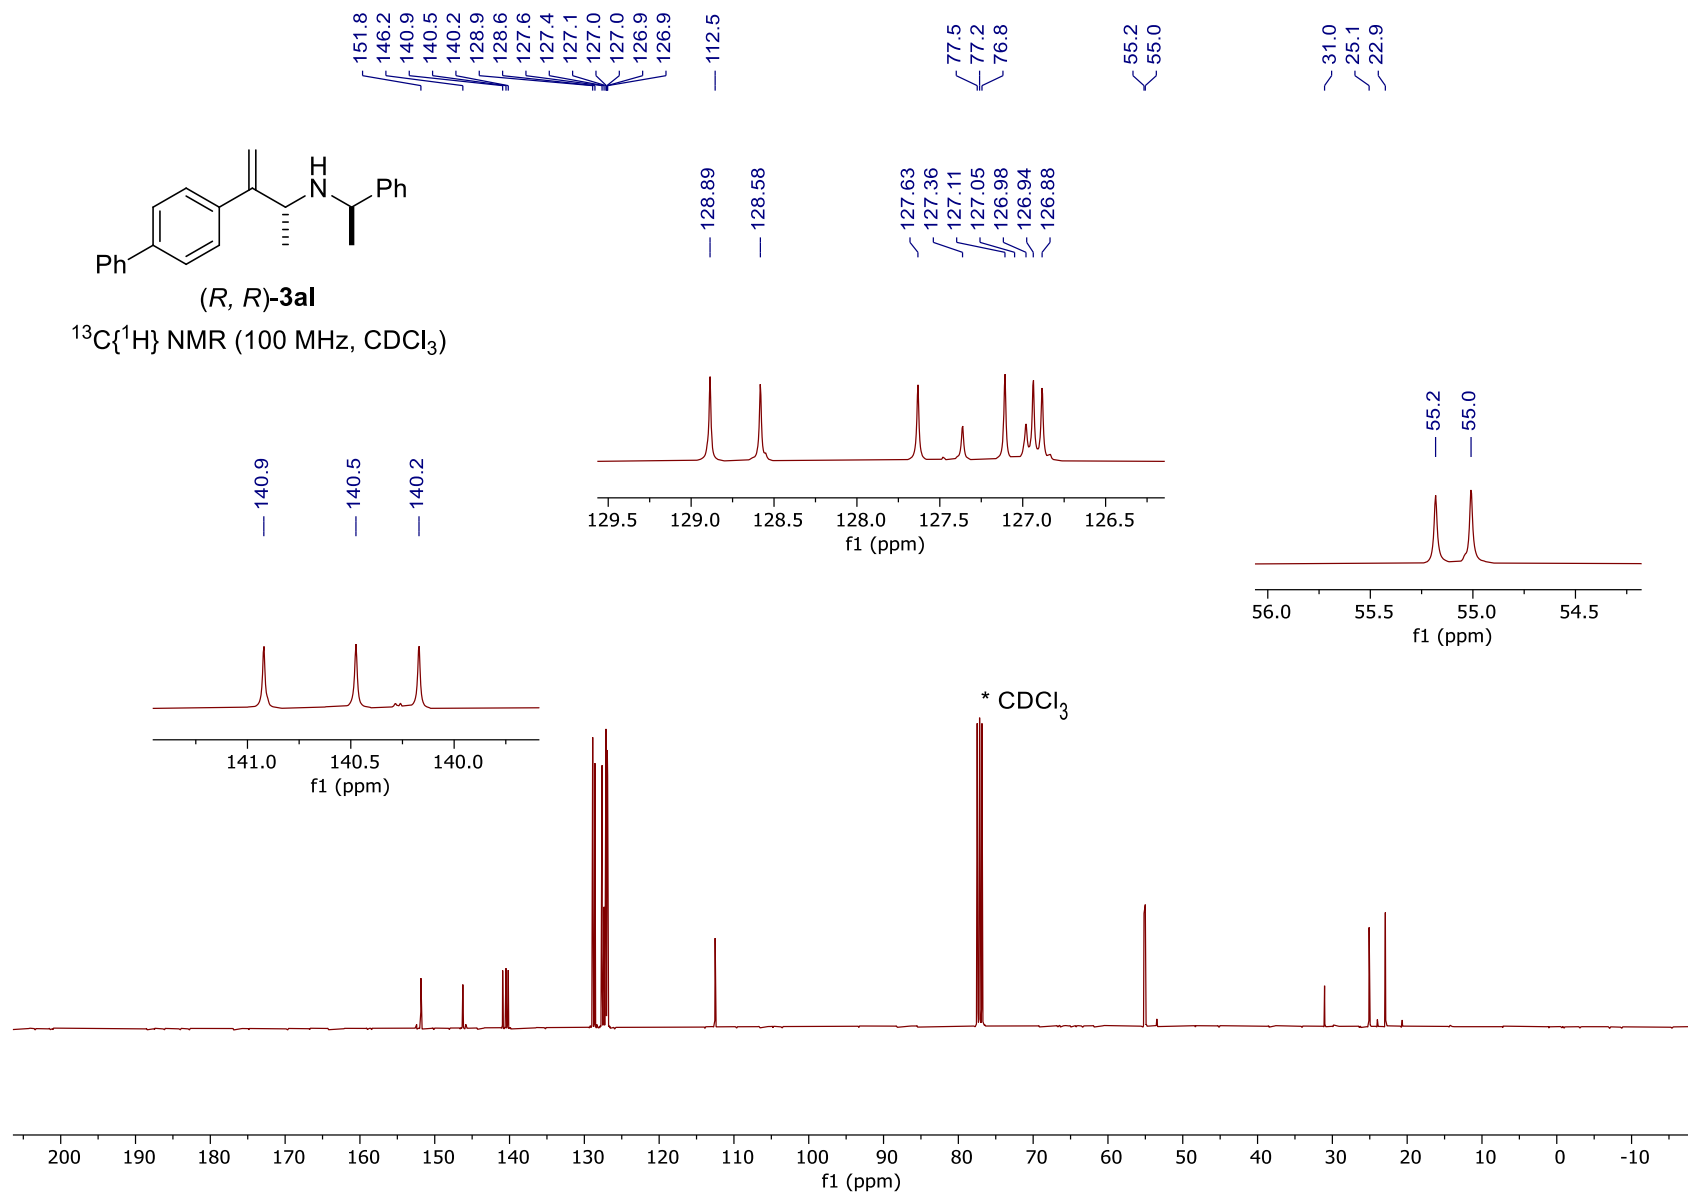

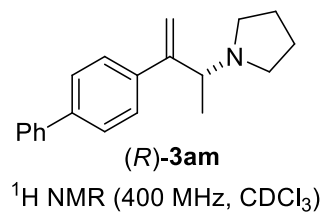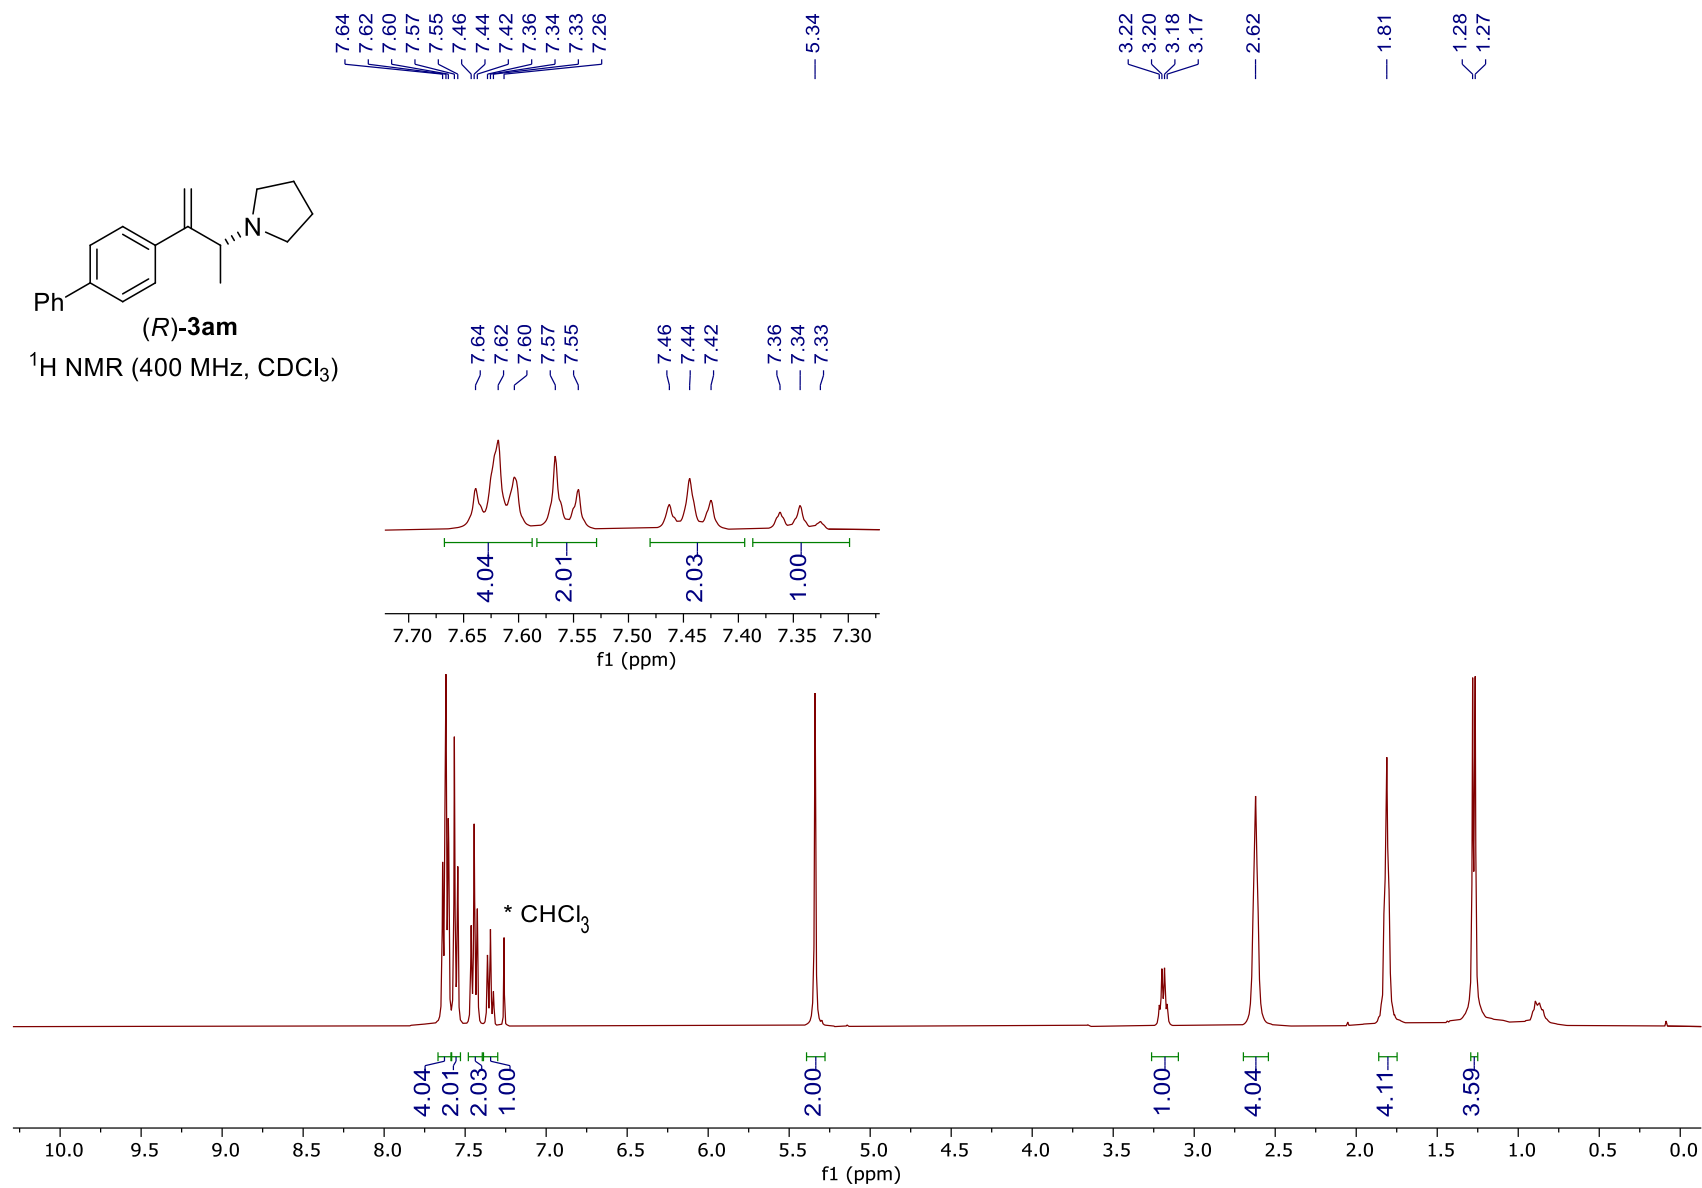

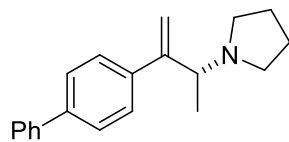

**(R)-3am**

$^{13}\text{C}\{^1\text{H}\}$  NMR (100 MHz,  $\text{CDCl}_3$ )

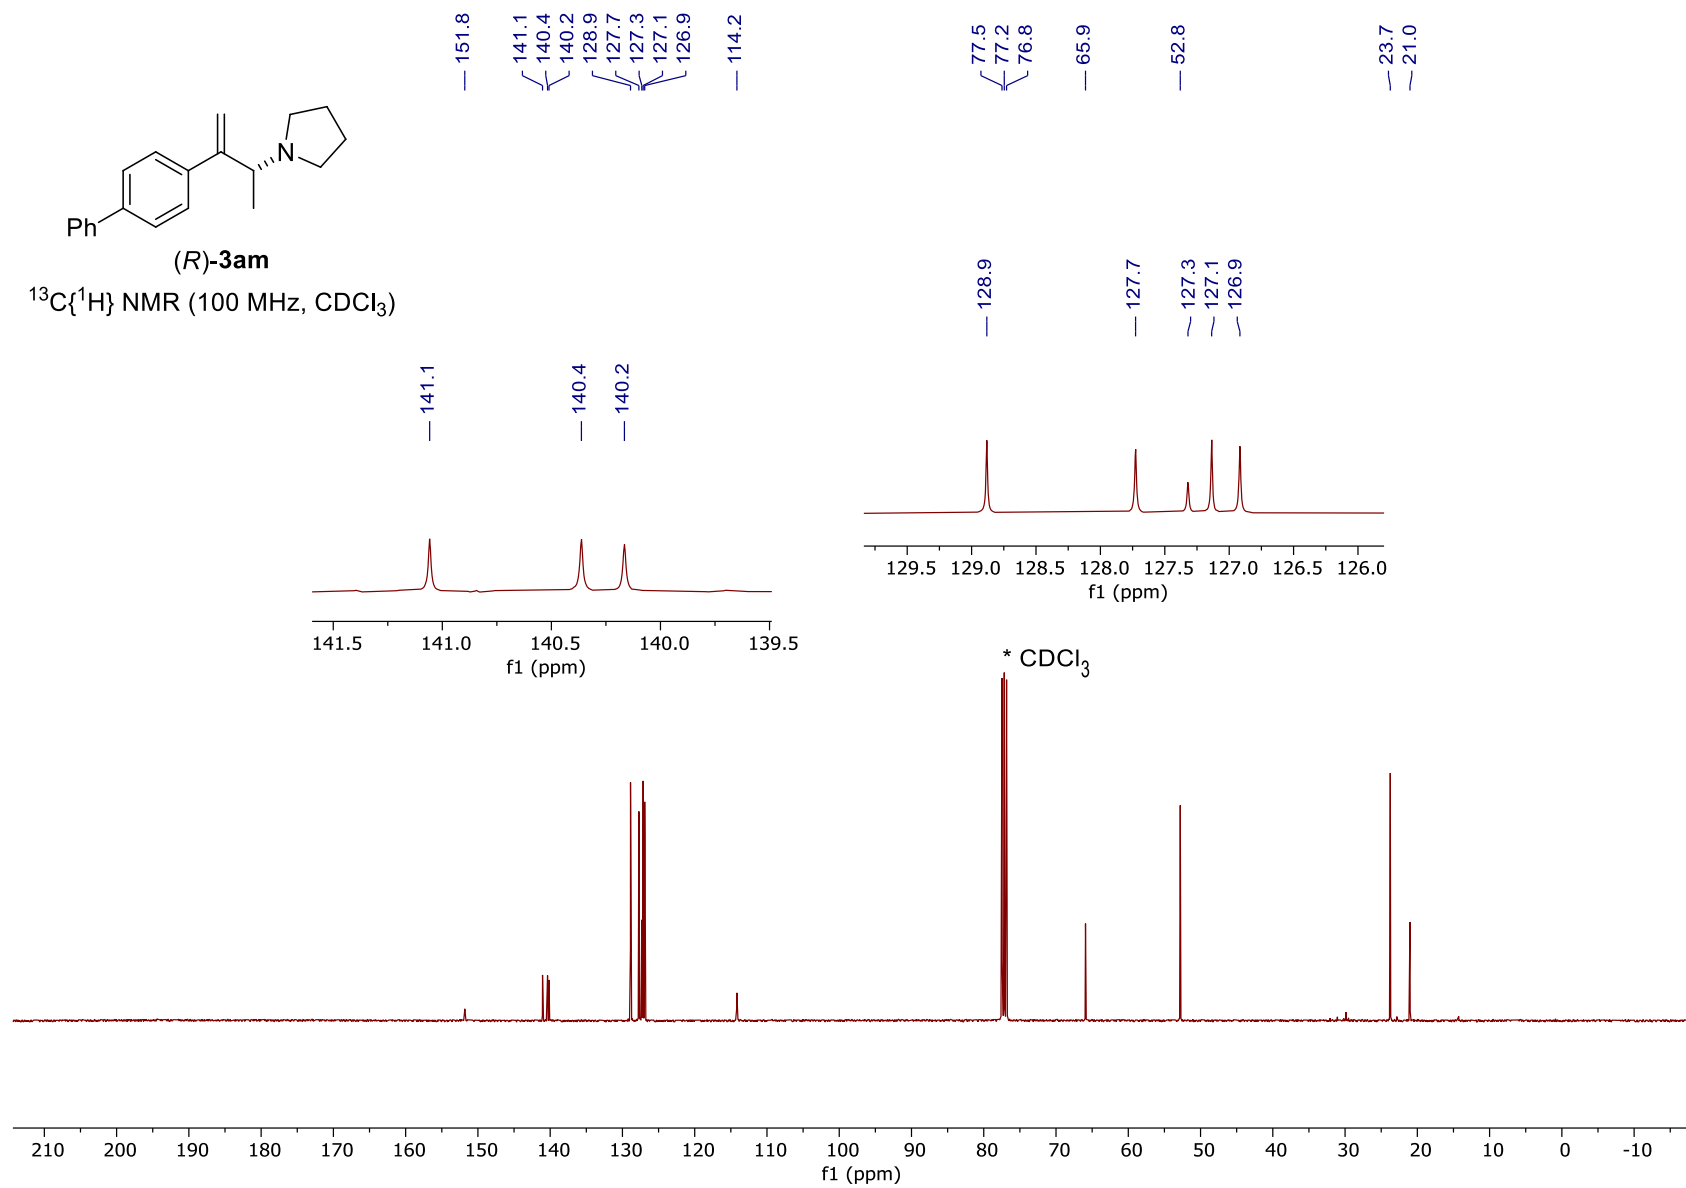

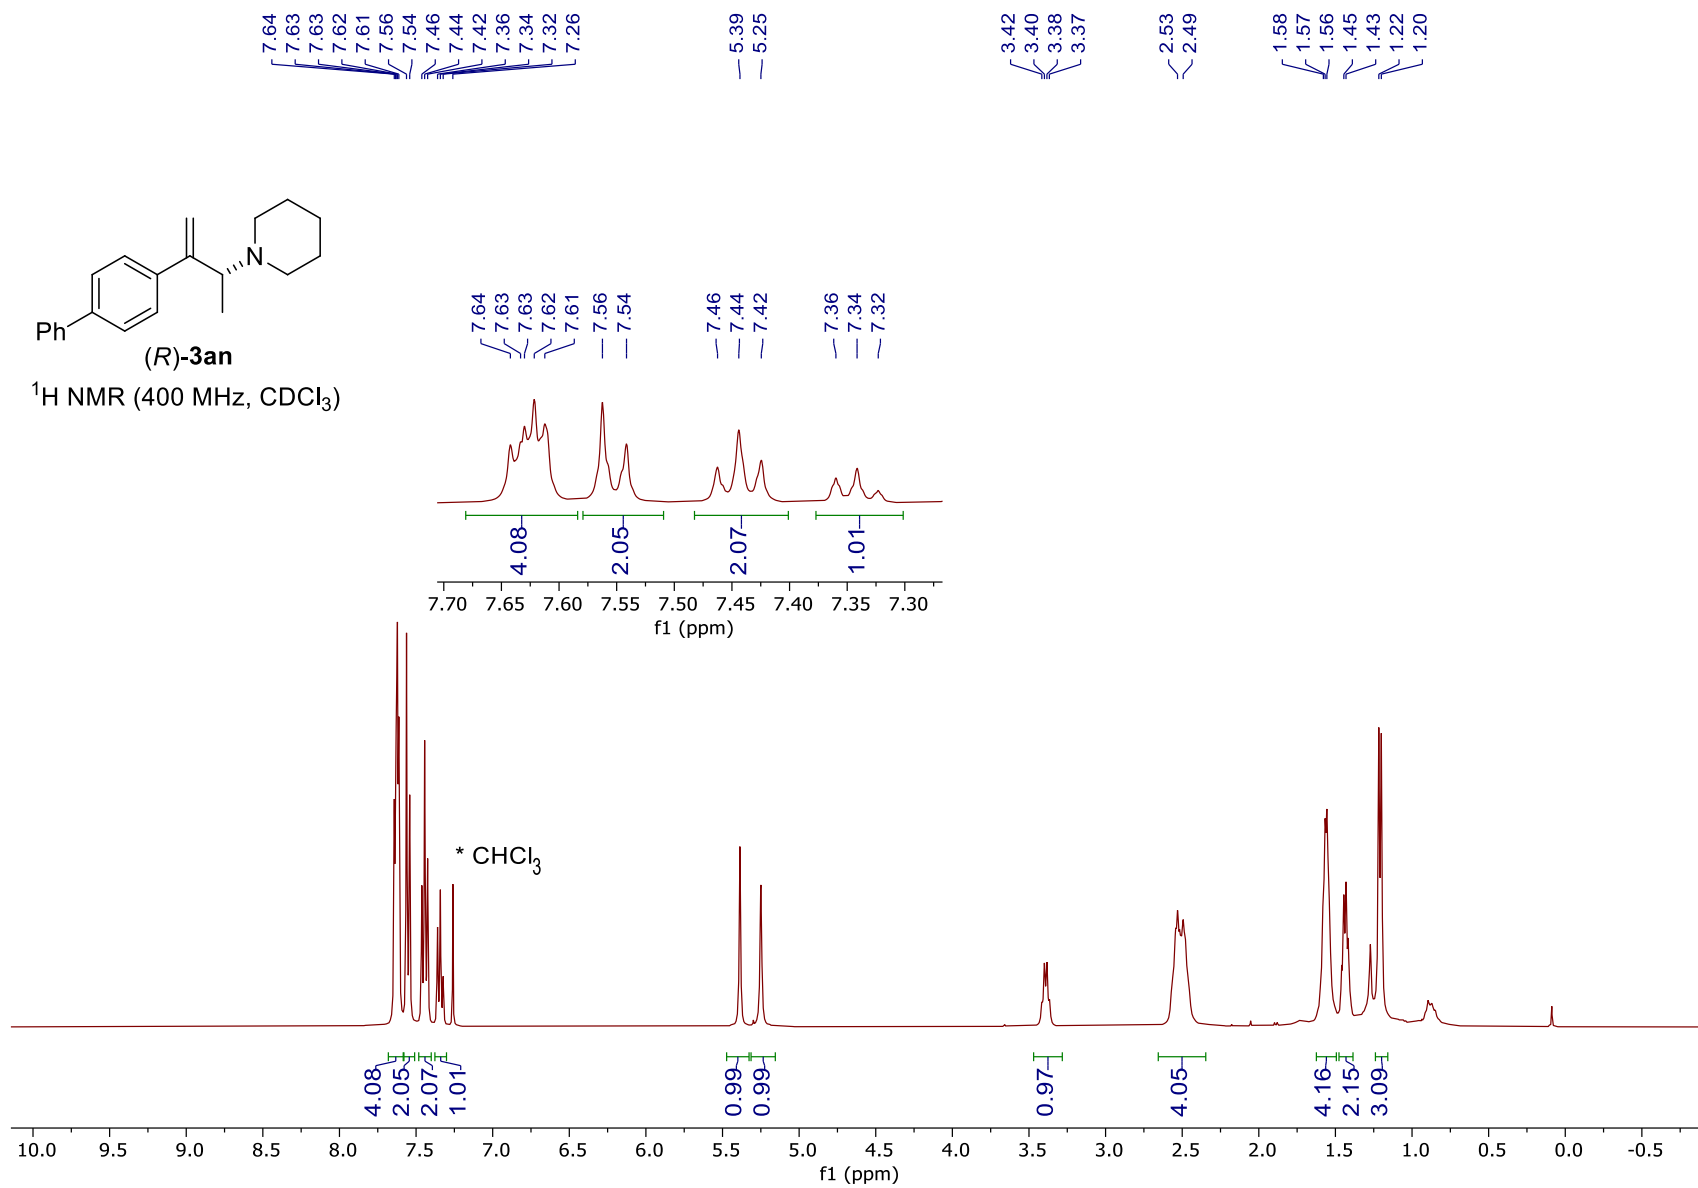

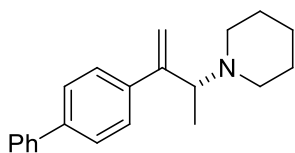

(*R*)-3an

$^{13}\text{C}\{^1\text{H}\}$  NMR (100 MHz,  $\text{CDCl}_3$ )

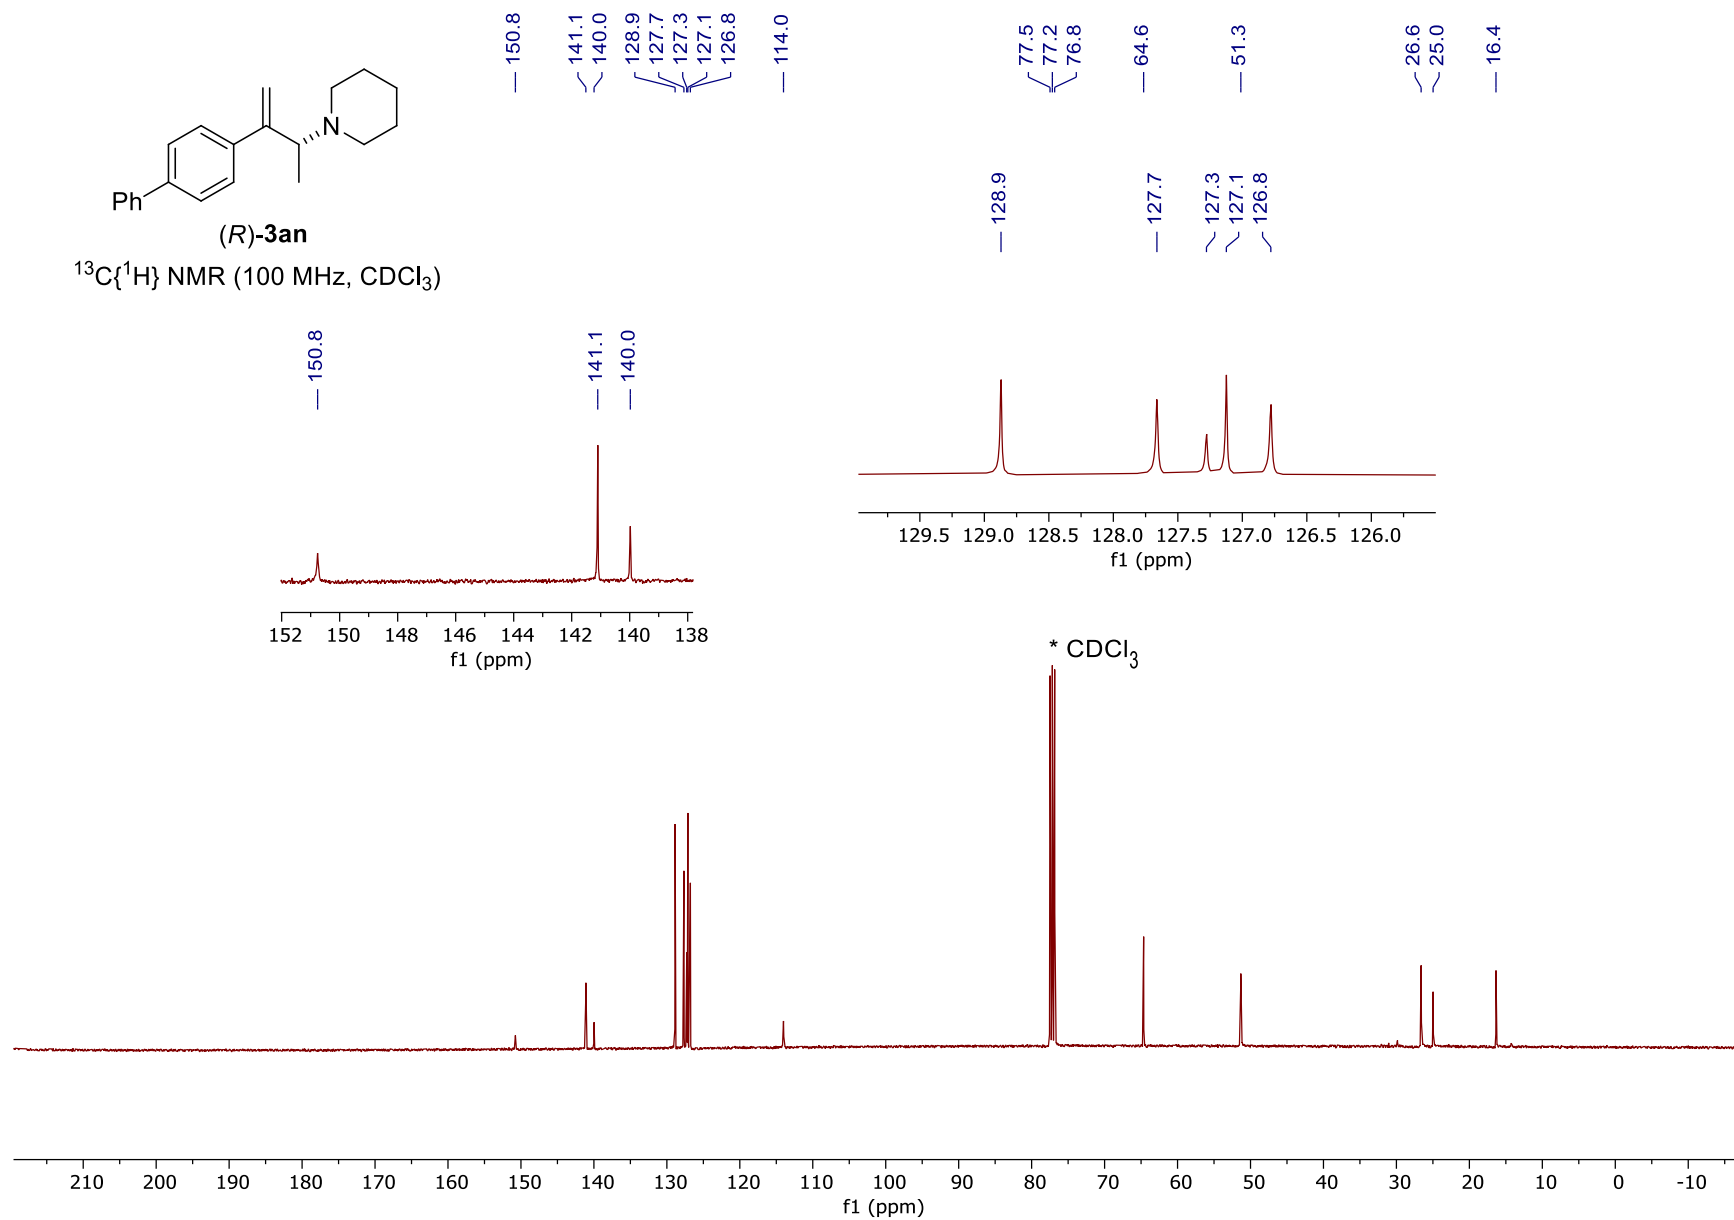



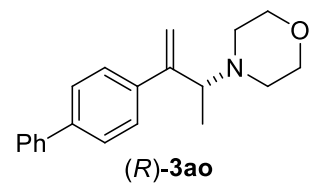

$^1\text{H}$  NMR (400 MHz,  $\text{CDCl}_3$ )

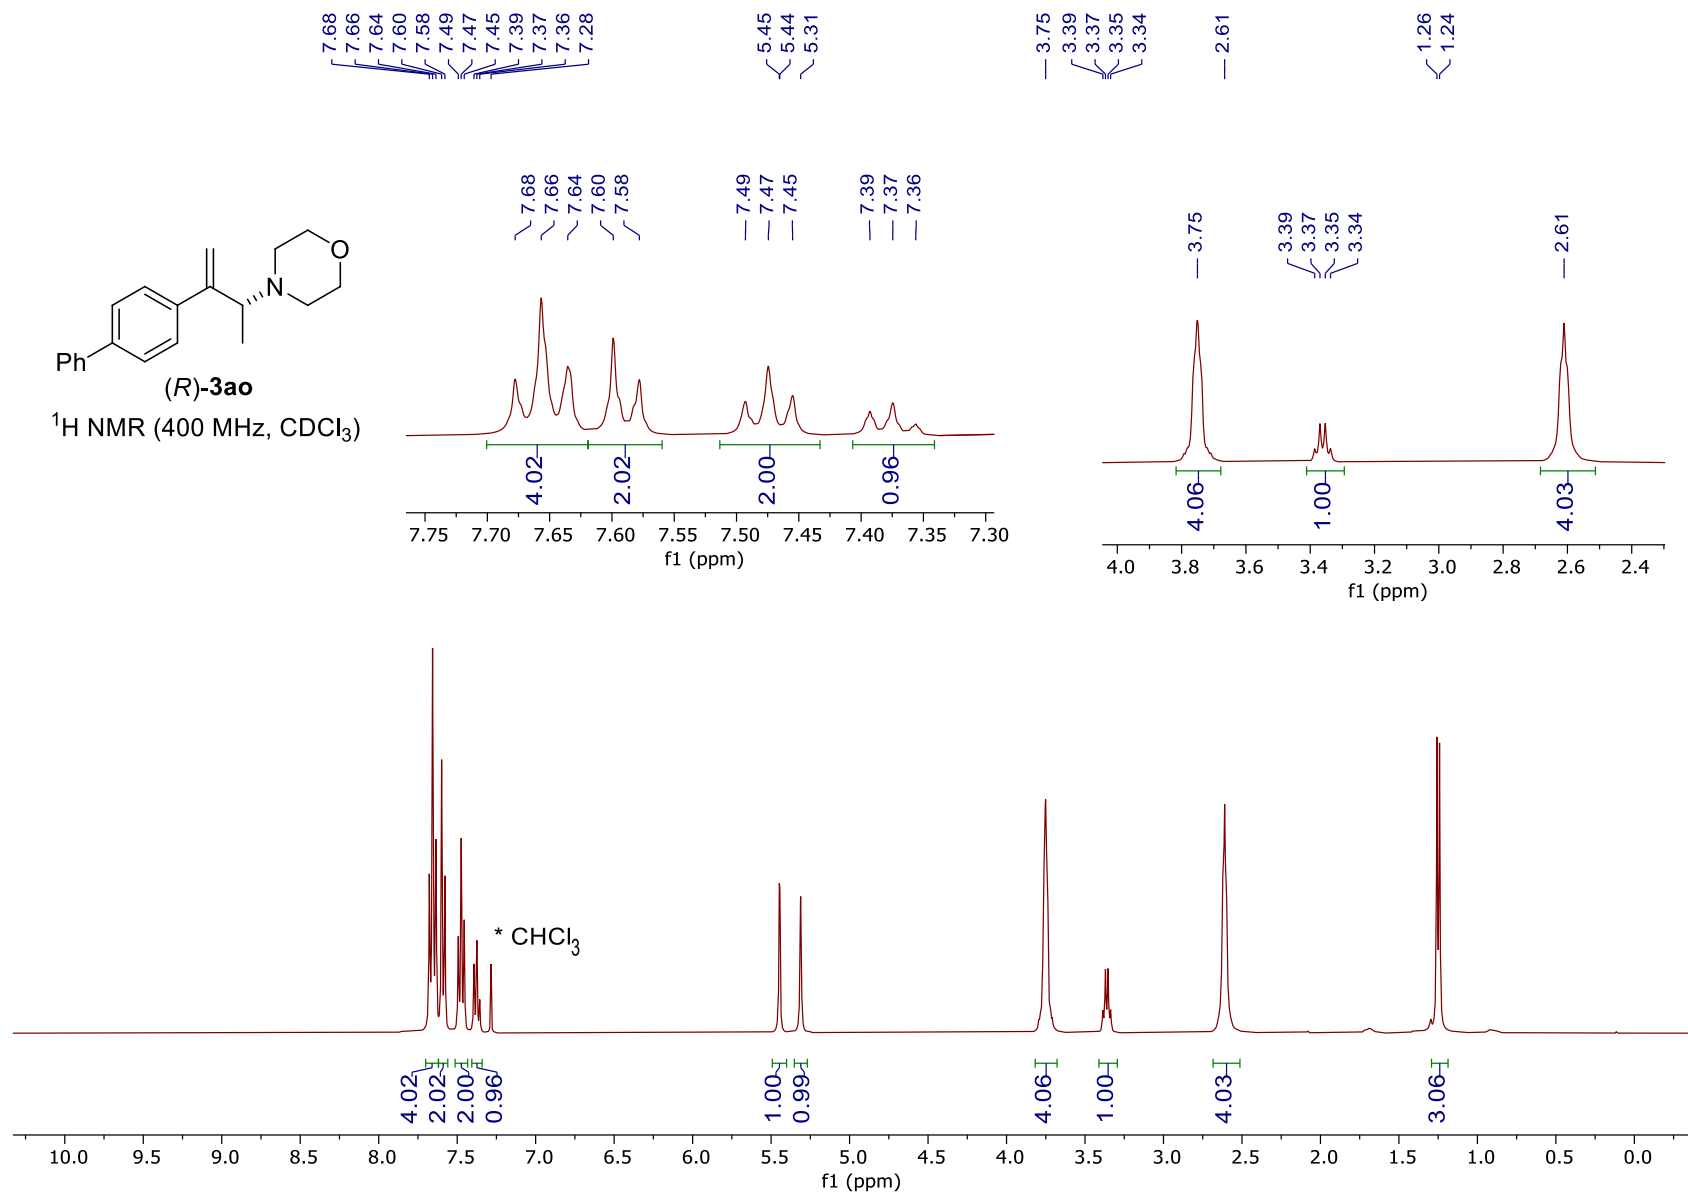

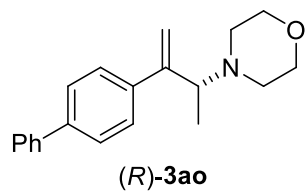

$^{13}\text{C}\{^1\text{H}\}$  NMR (100 MHz,  $\text{CDCl}_3$ )

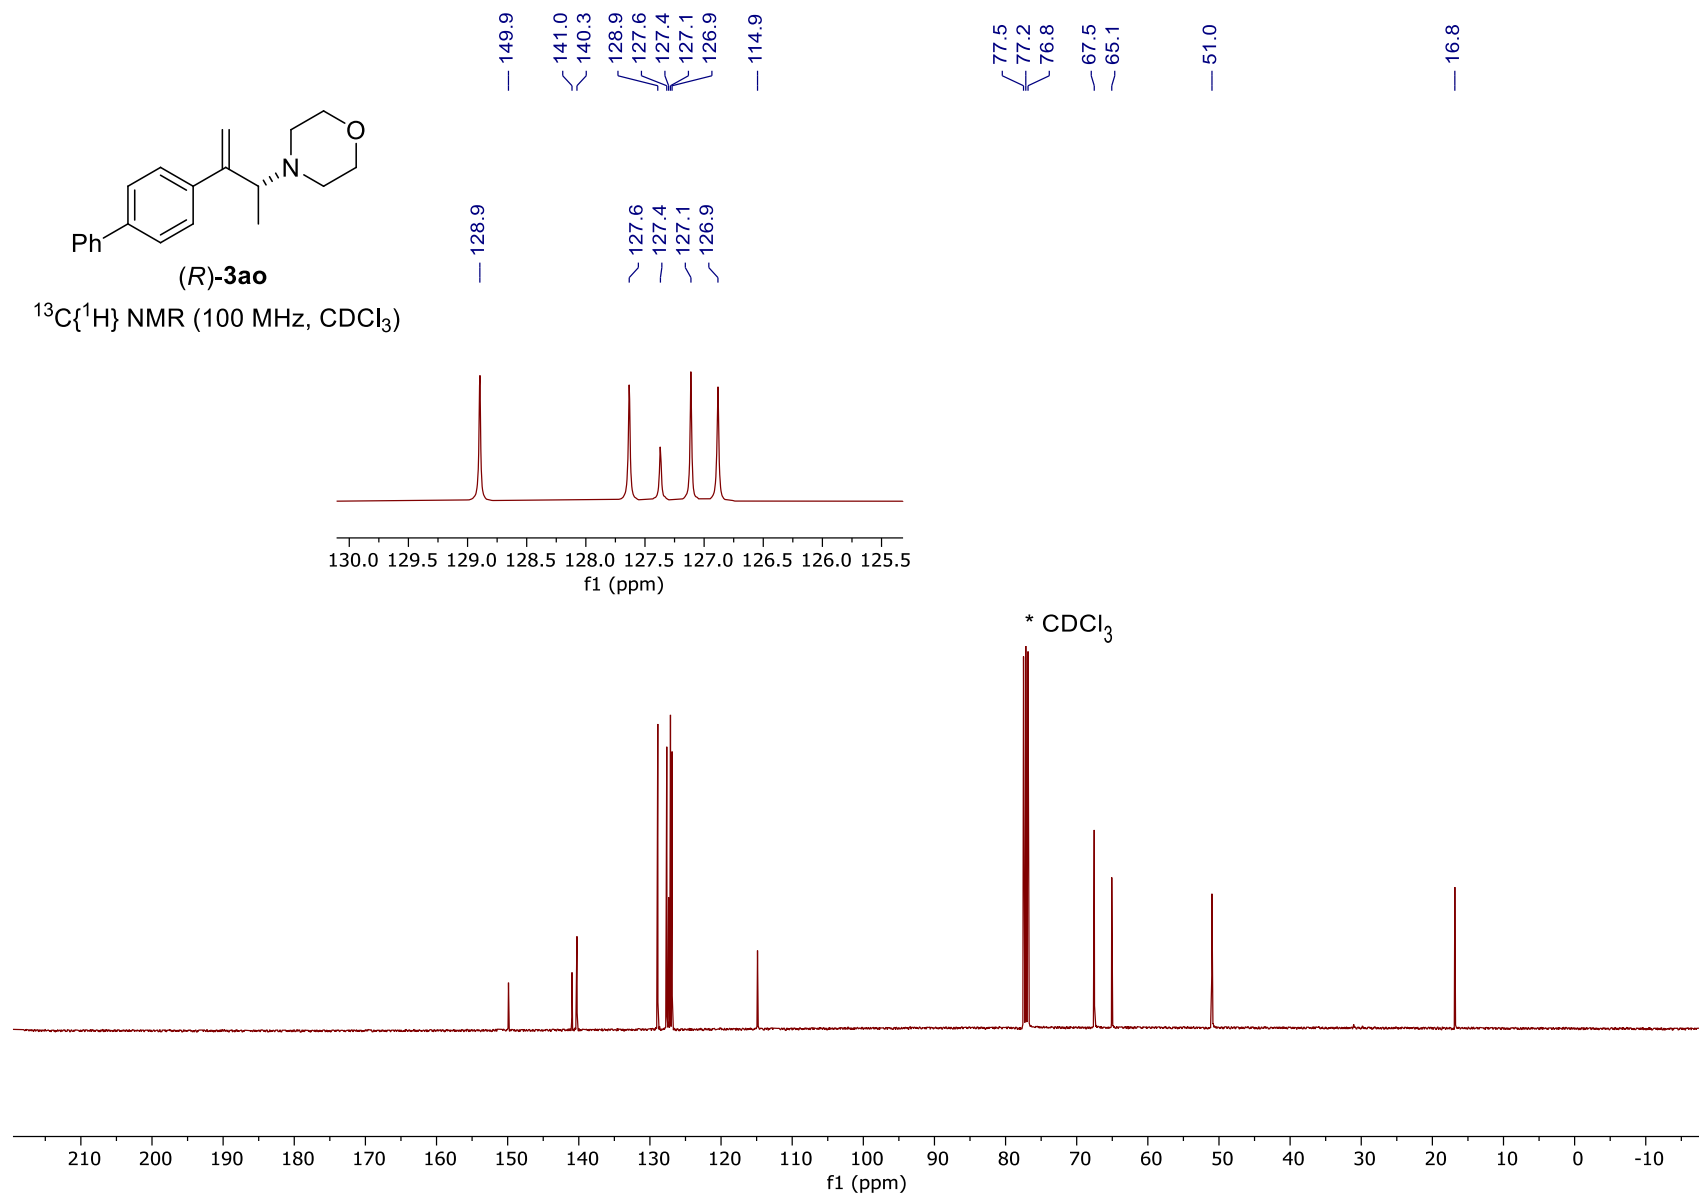

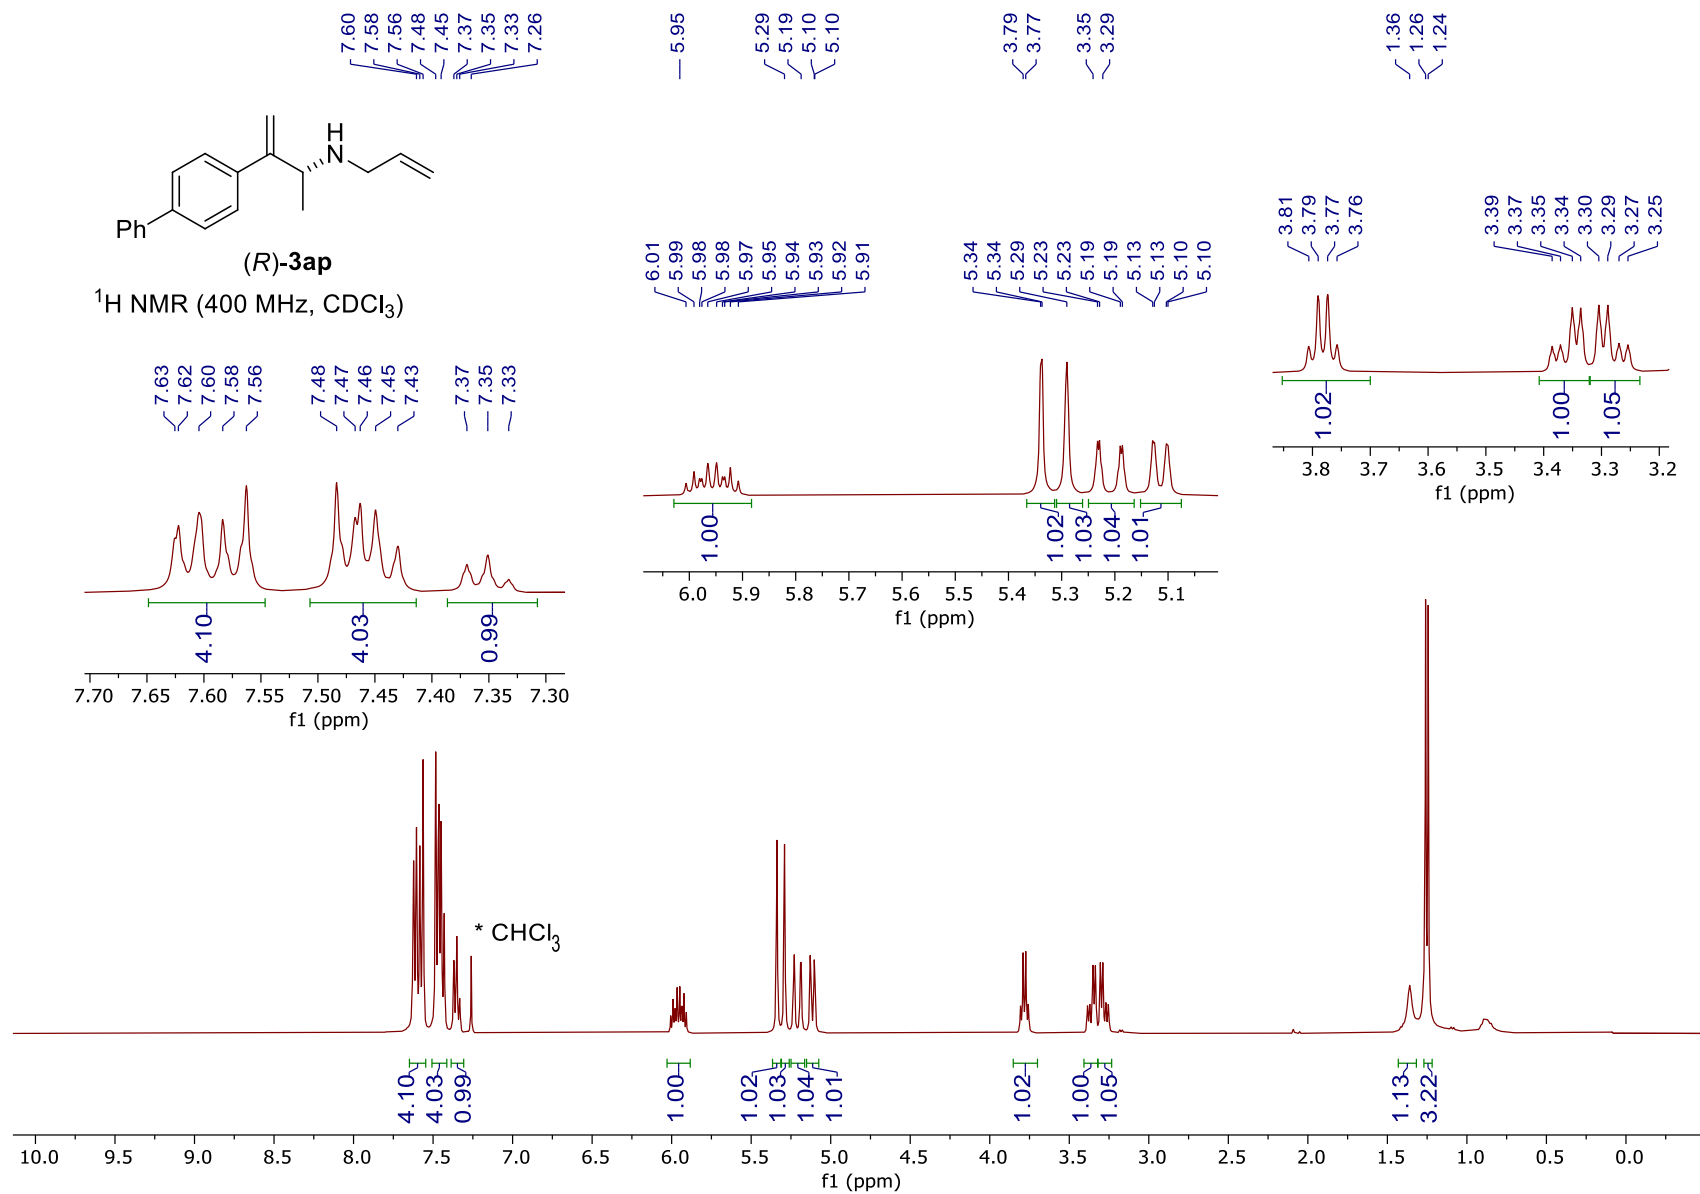

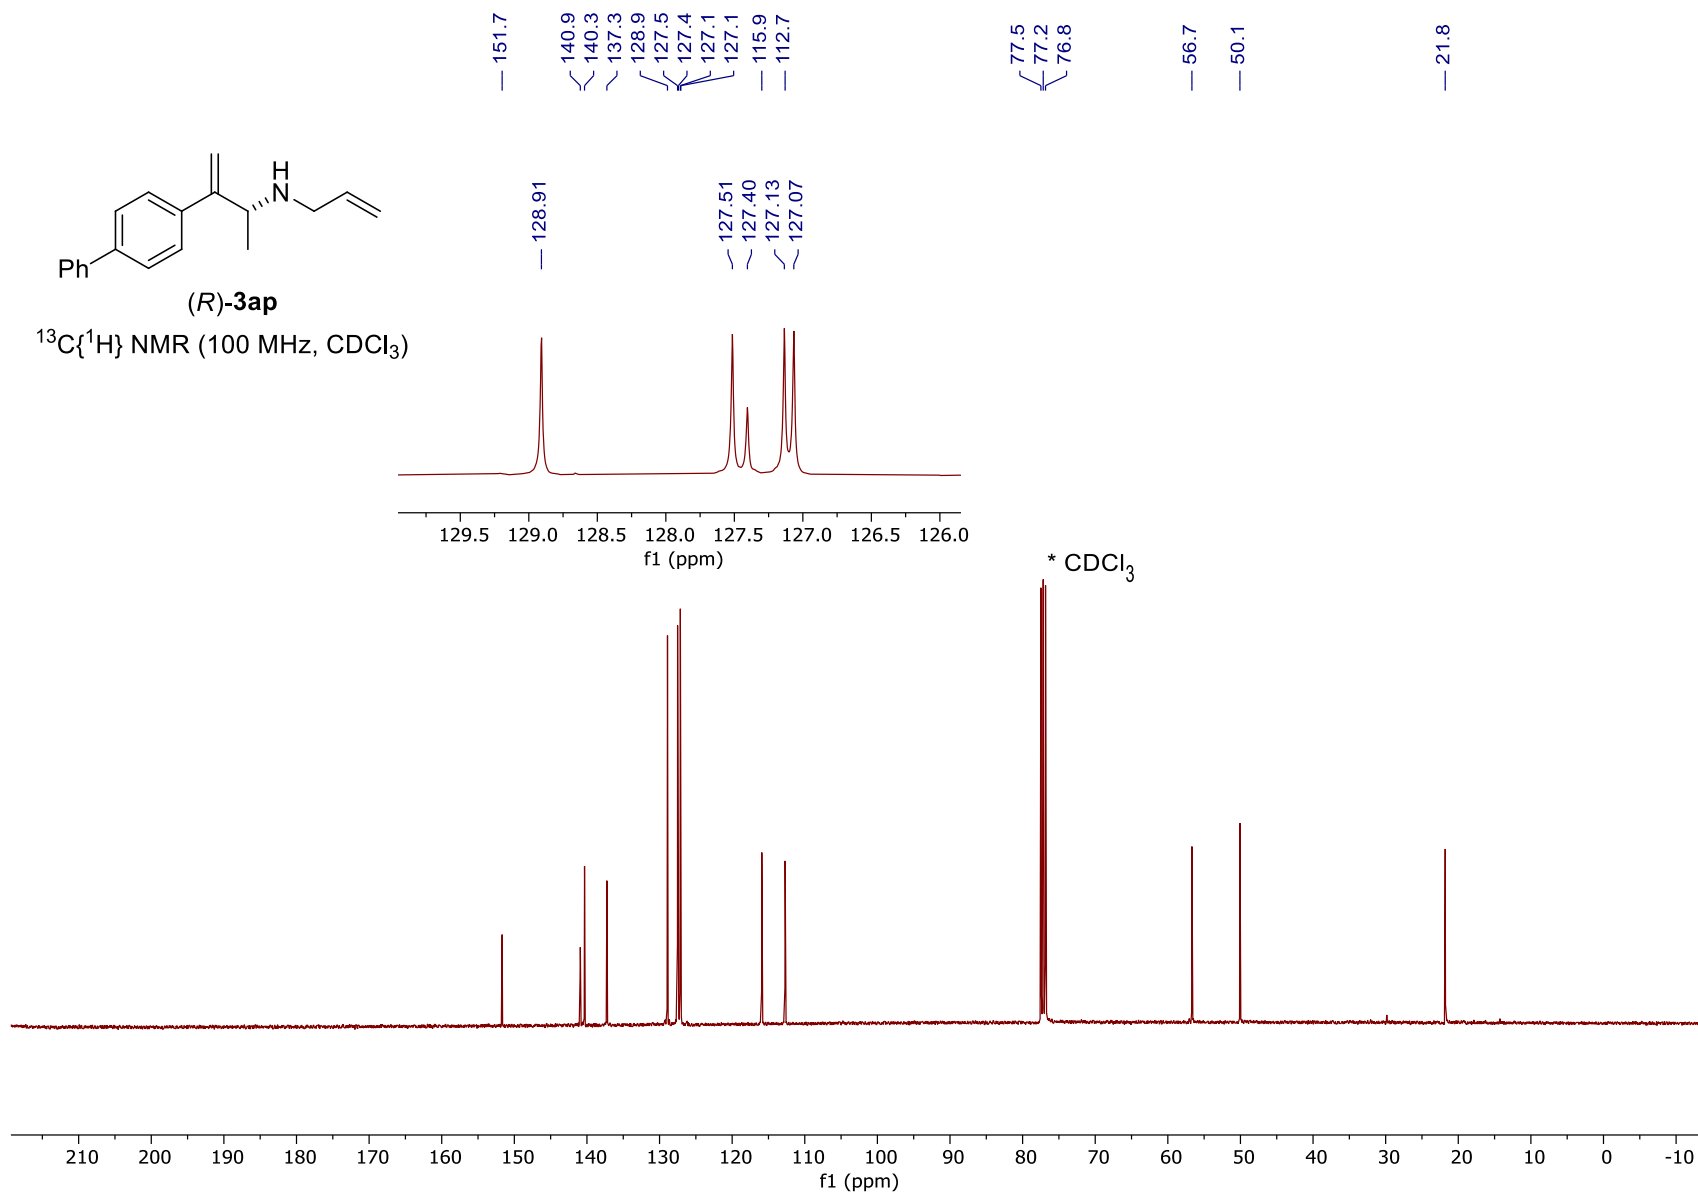

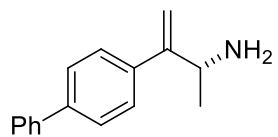

(R)-6a

<sup>1</sup>H NMR (400 MHz, Methanol-d<sub>4</sub>)

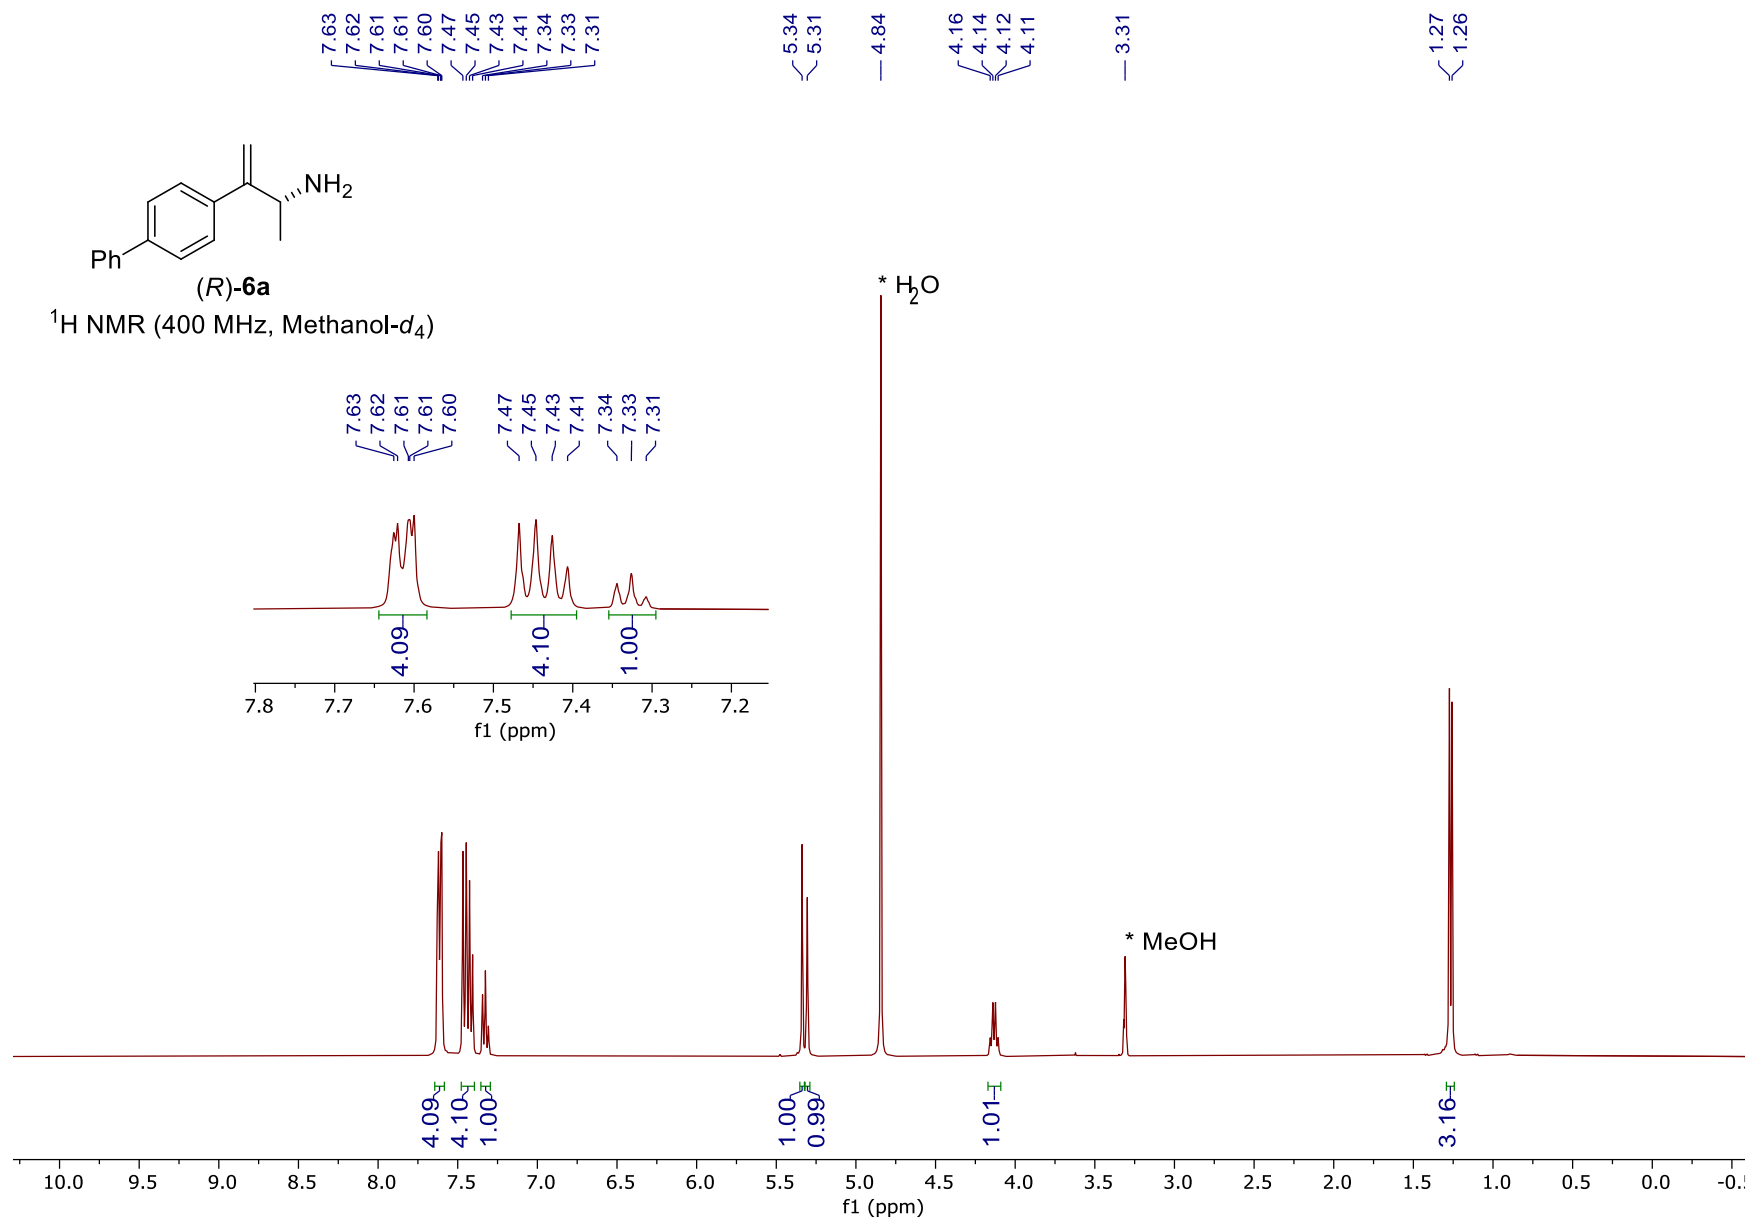

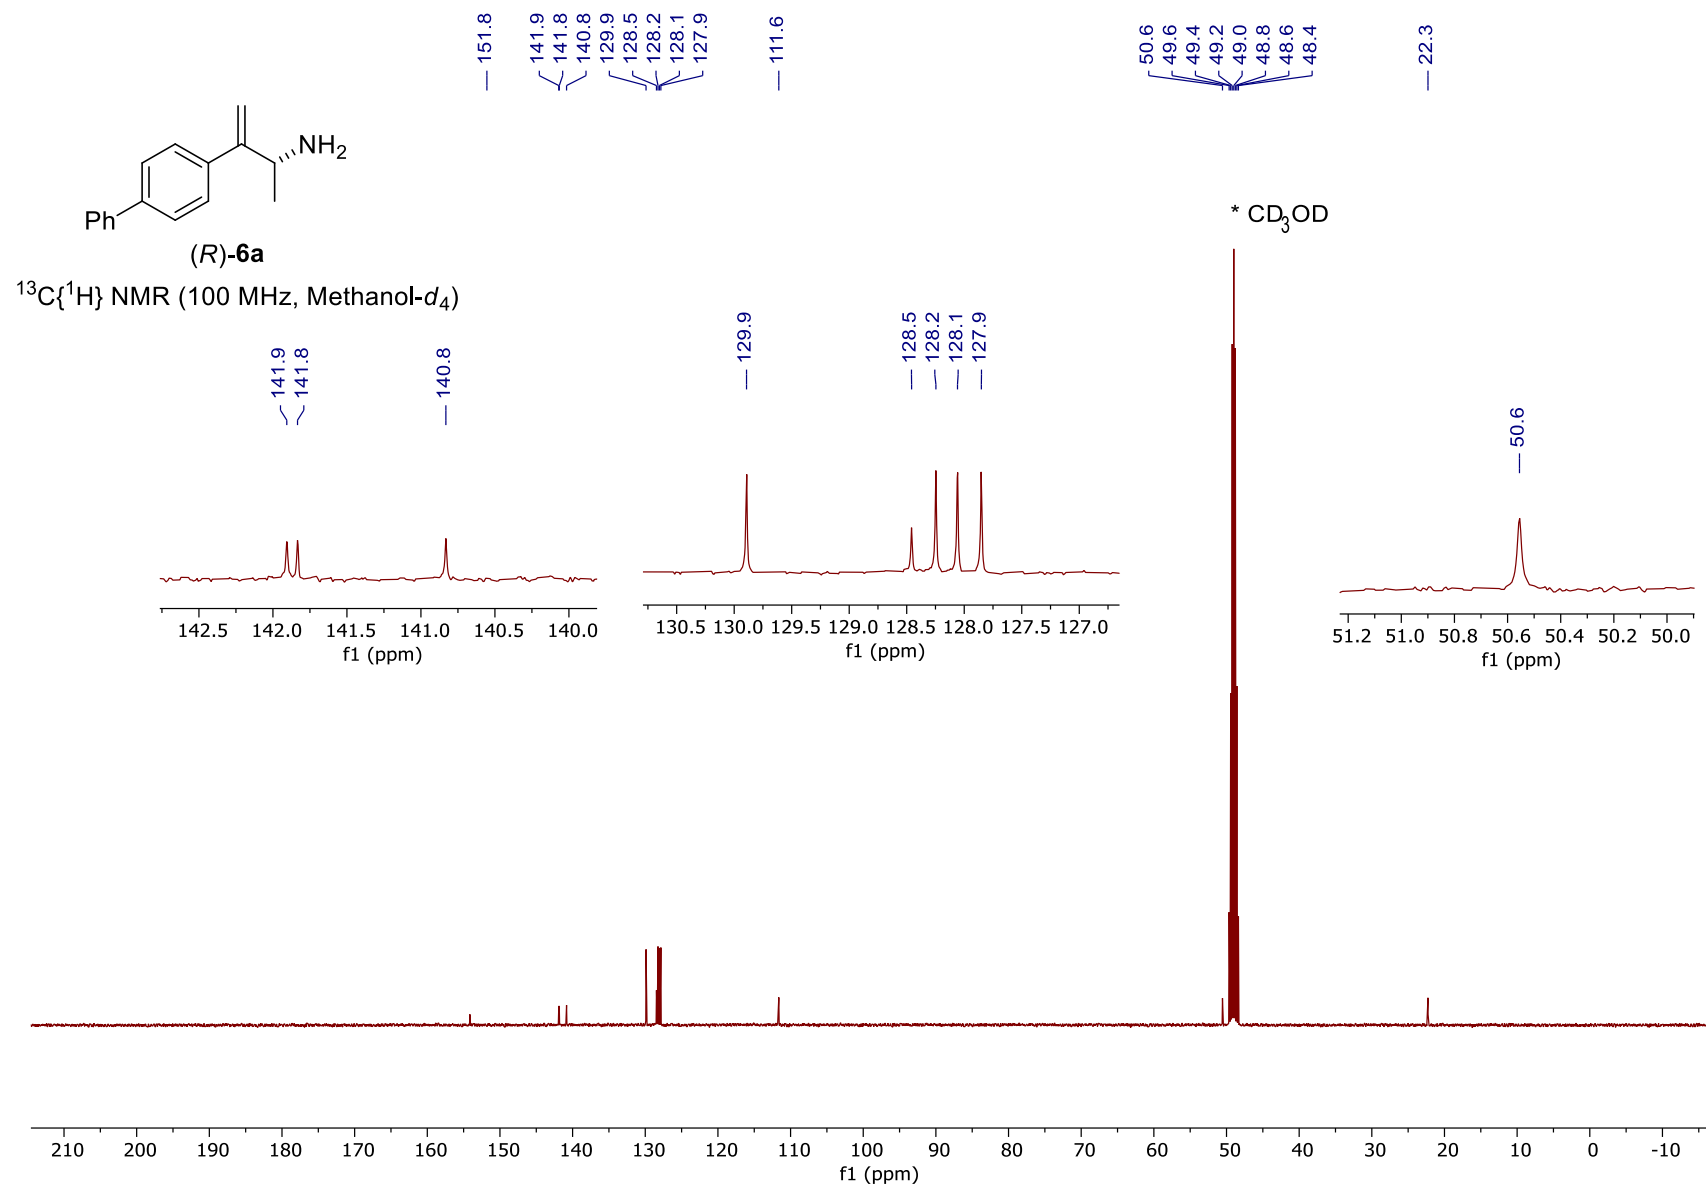

### 13. NMR Spectra of organometallic compounds

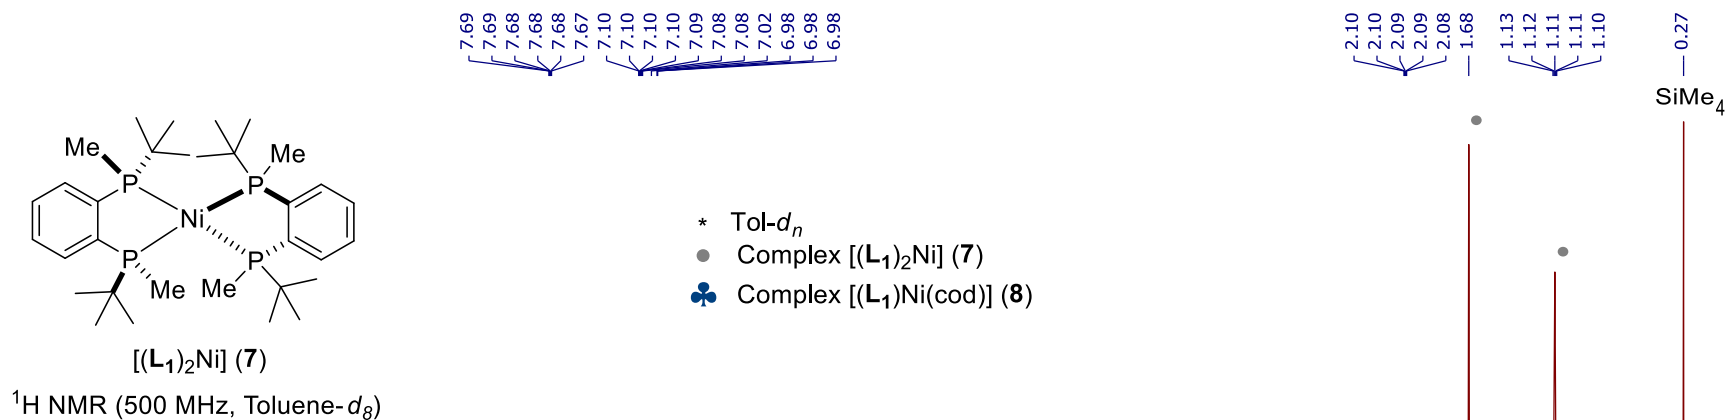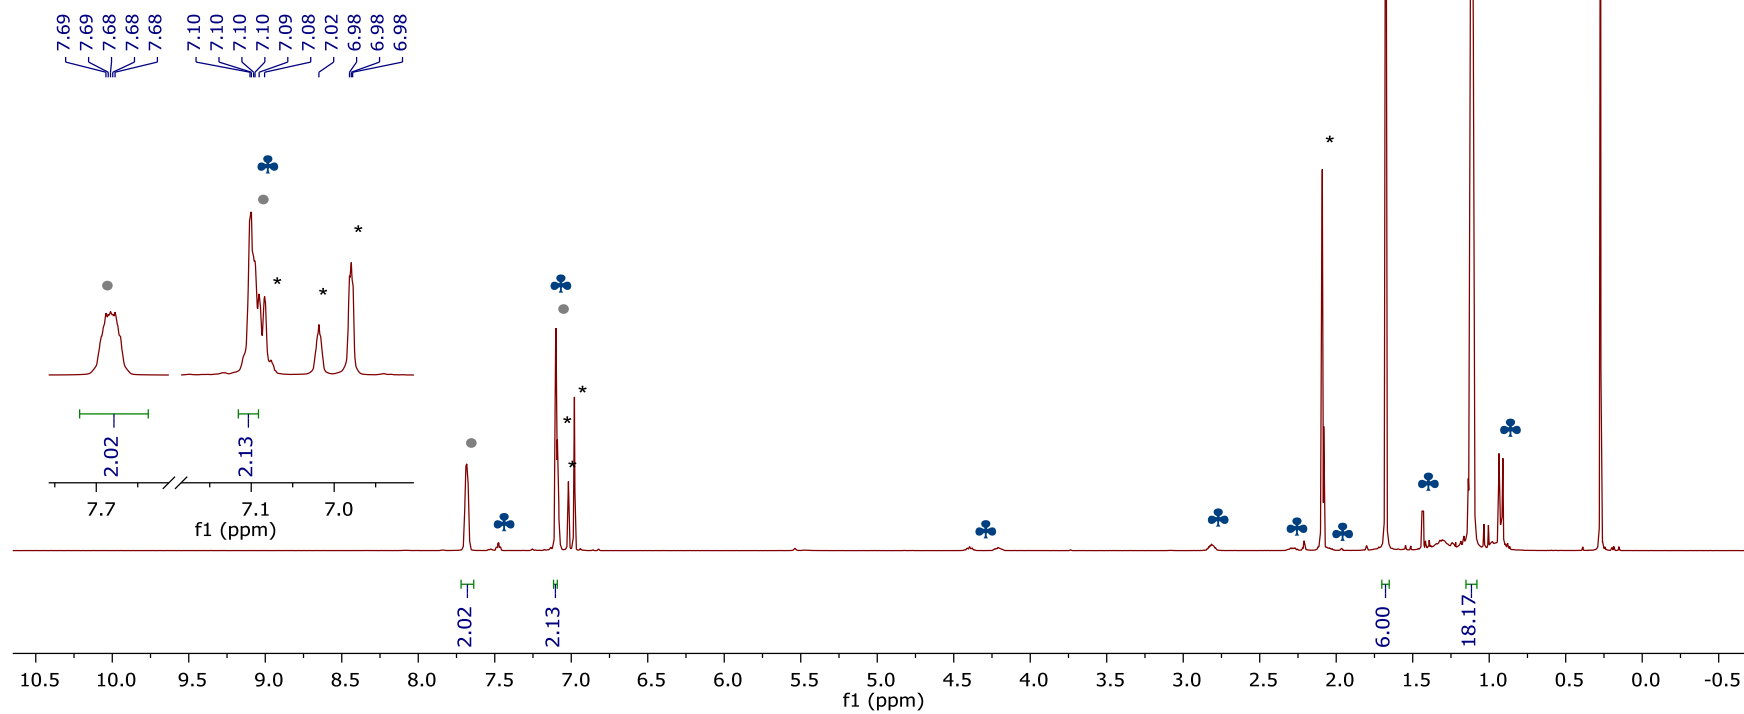





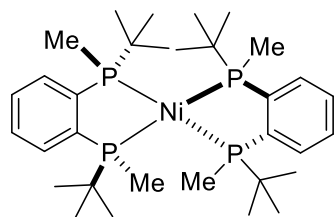

$[(L_1)_2Ni]$  (**7**)

$^{31}P$  NMR (160 MHz, Toluene- $d_8$ )

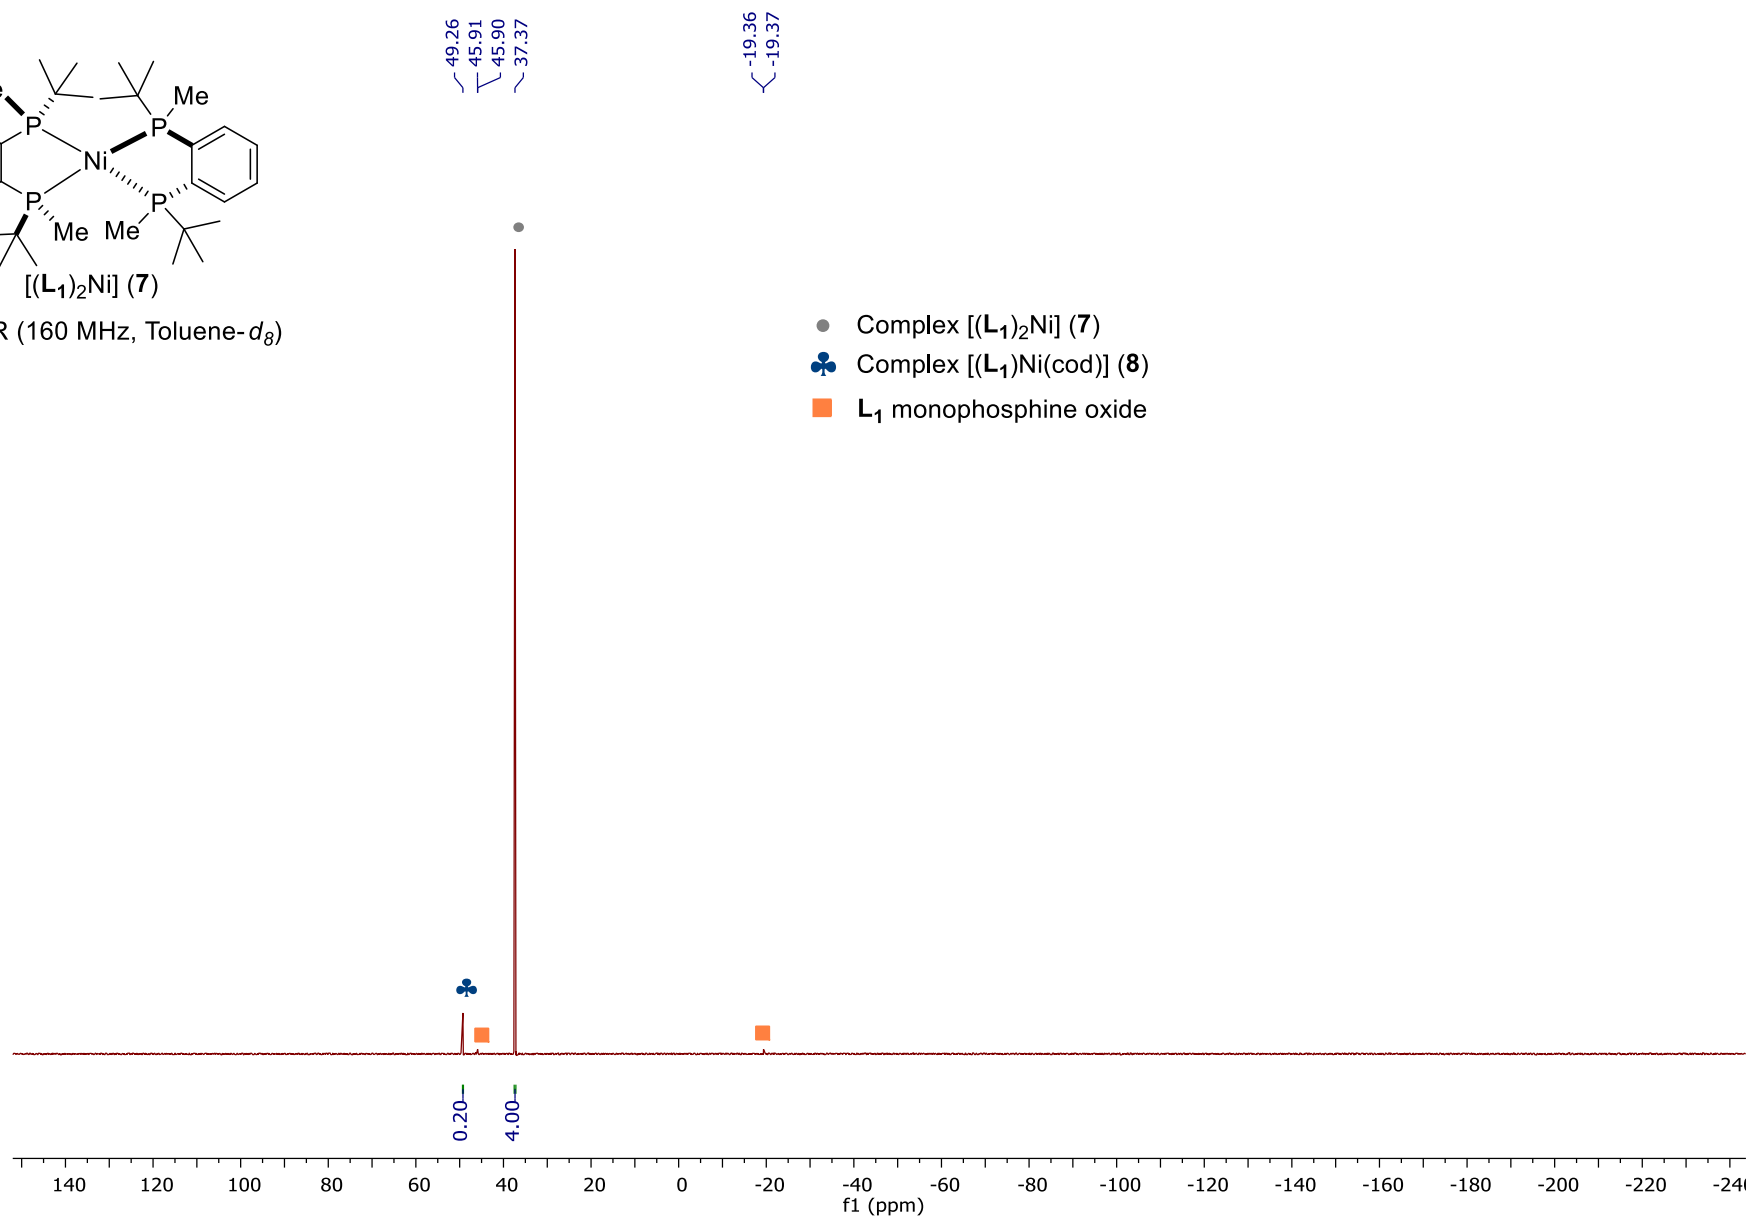

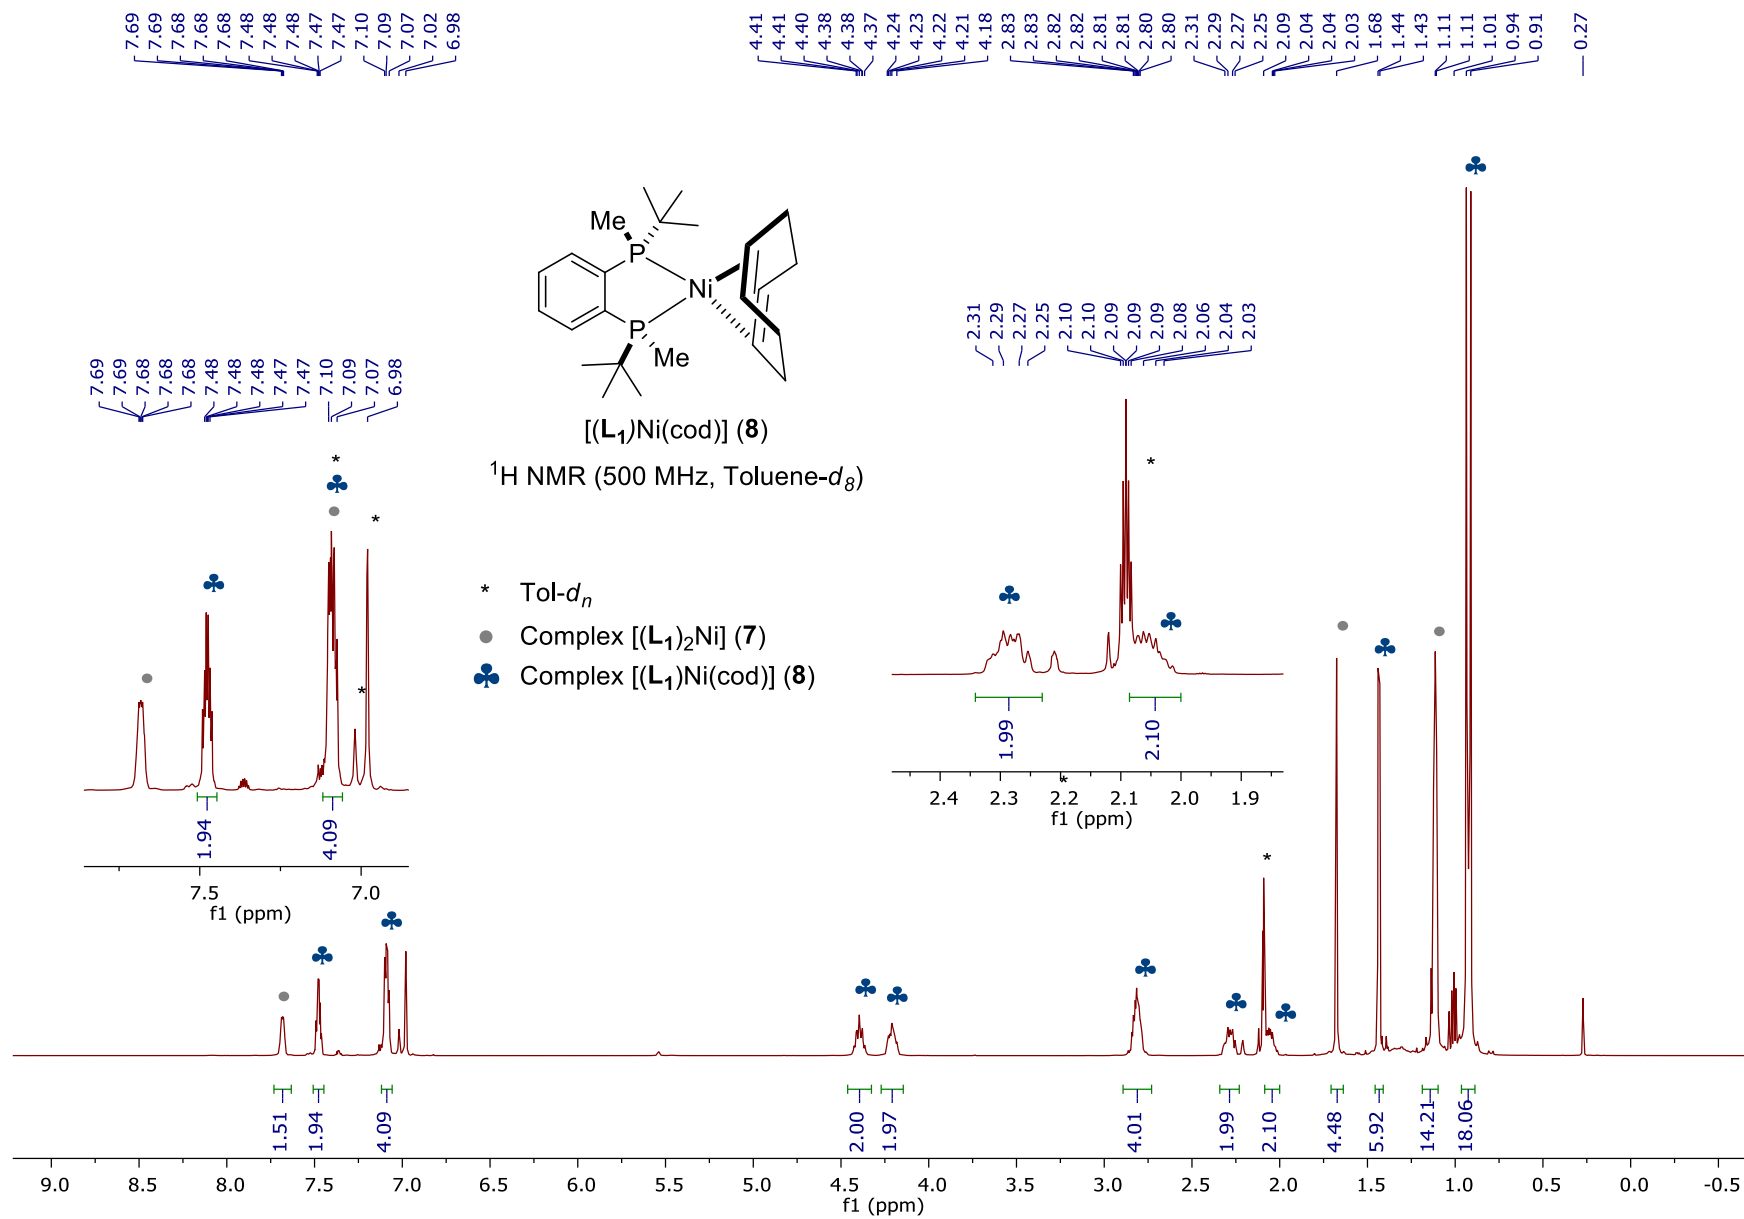

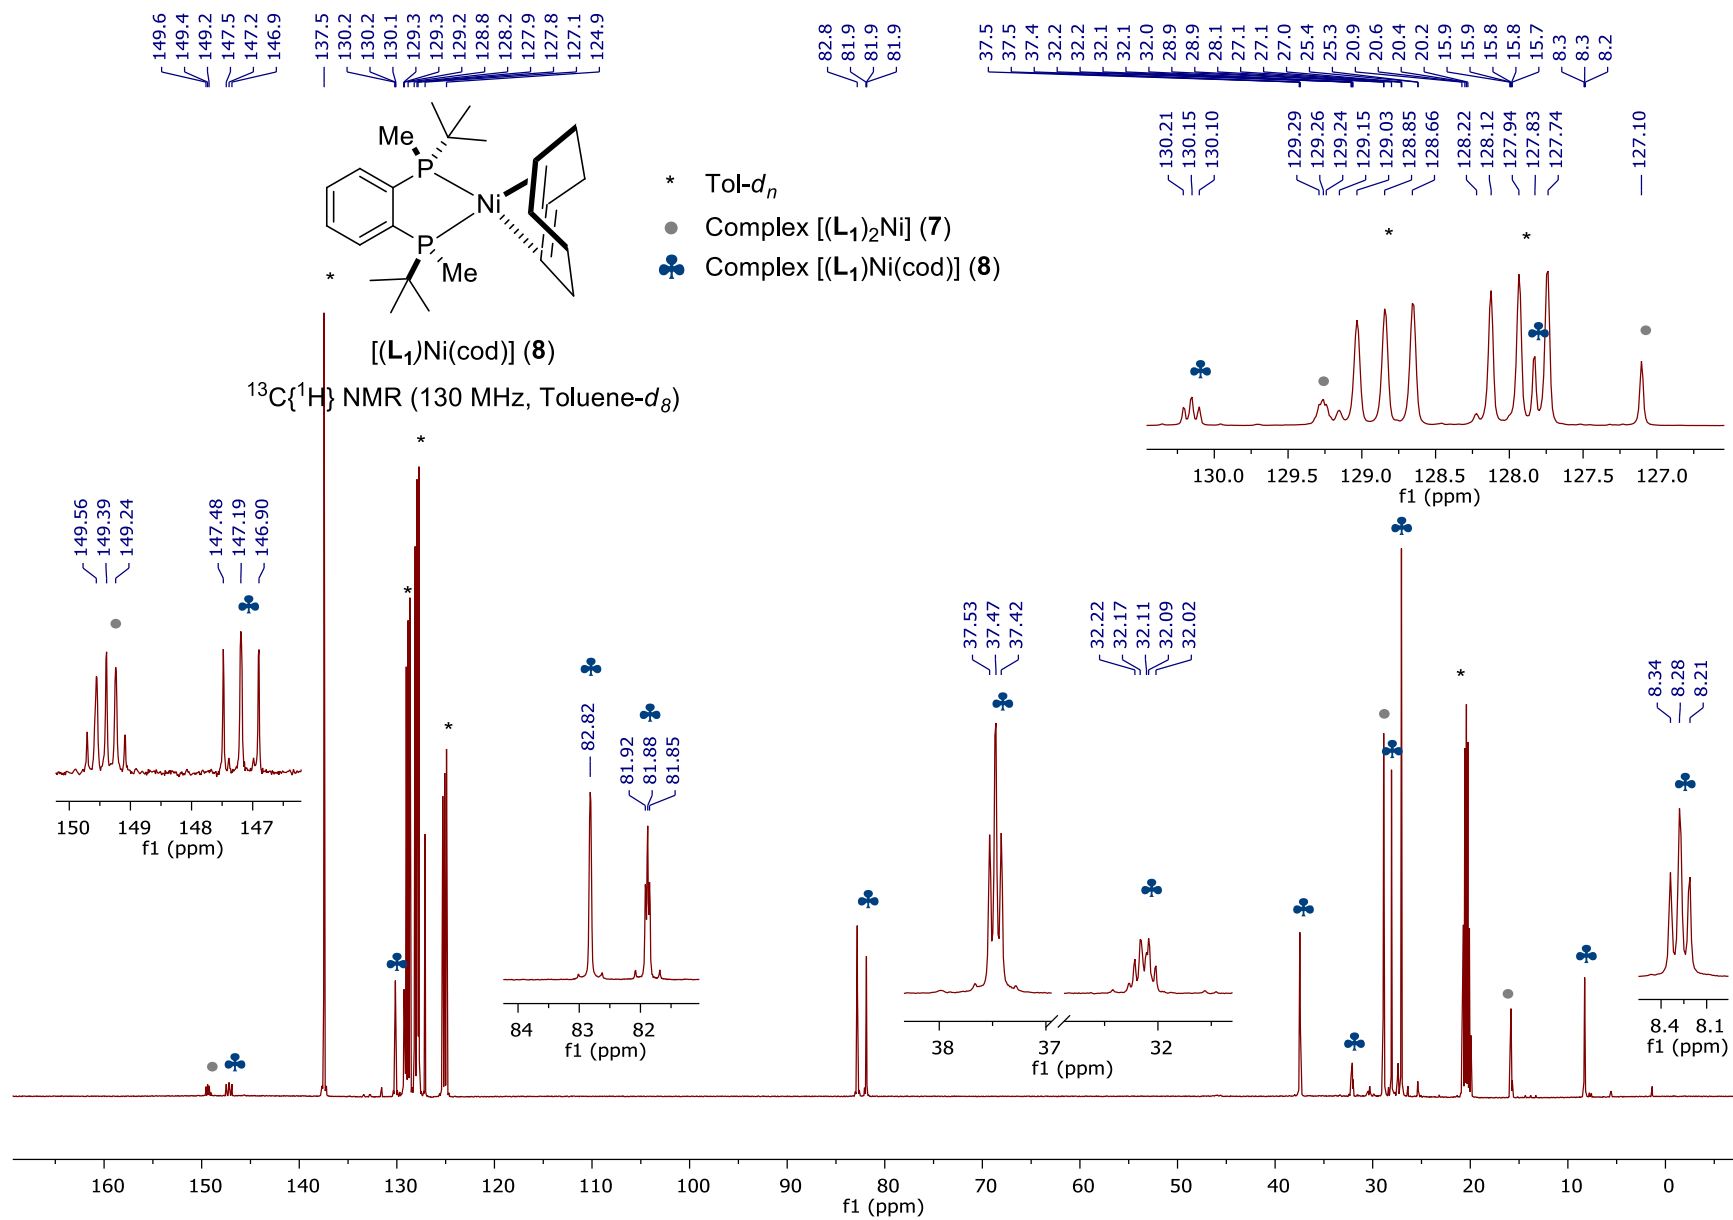

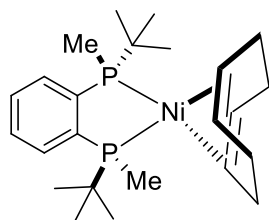

$[(L_1)Ni(cod)]$  (**8**)

$^{31}P$  NMR (160 MHz, Toluene- $d_8$ )

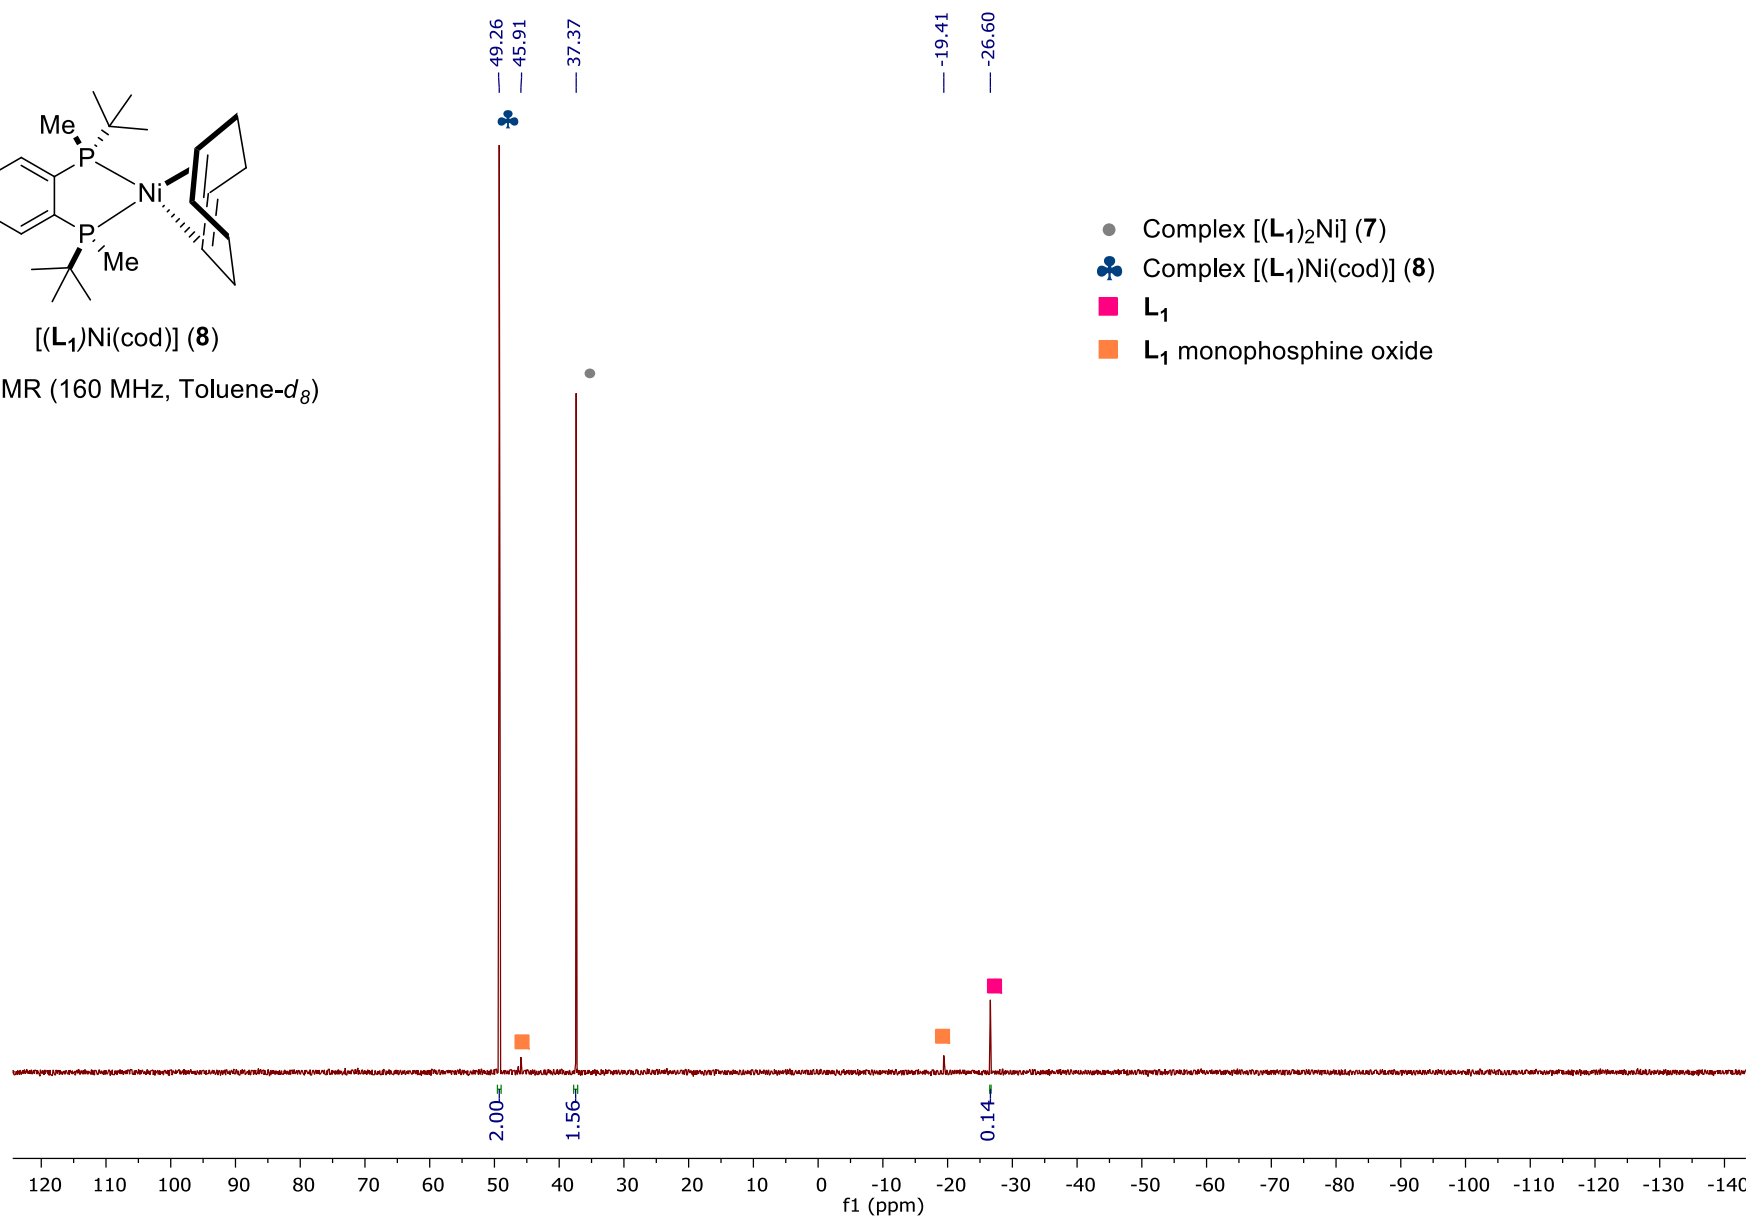

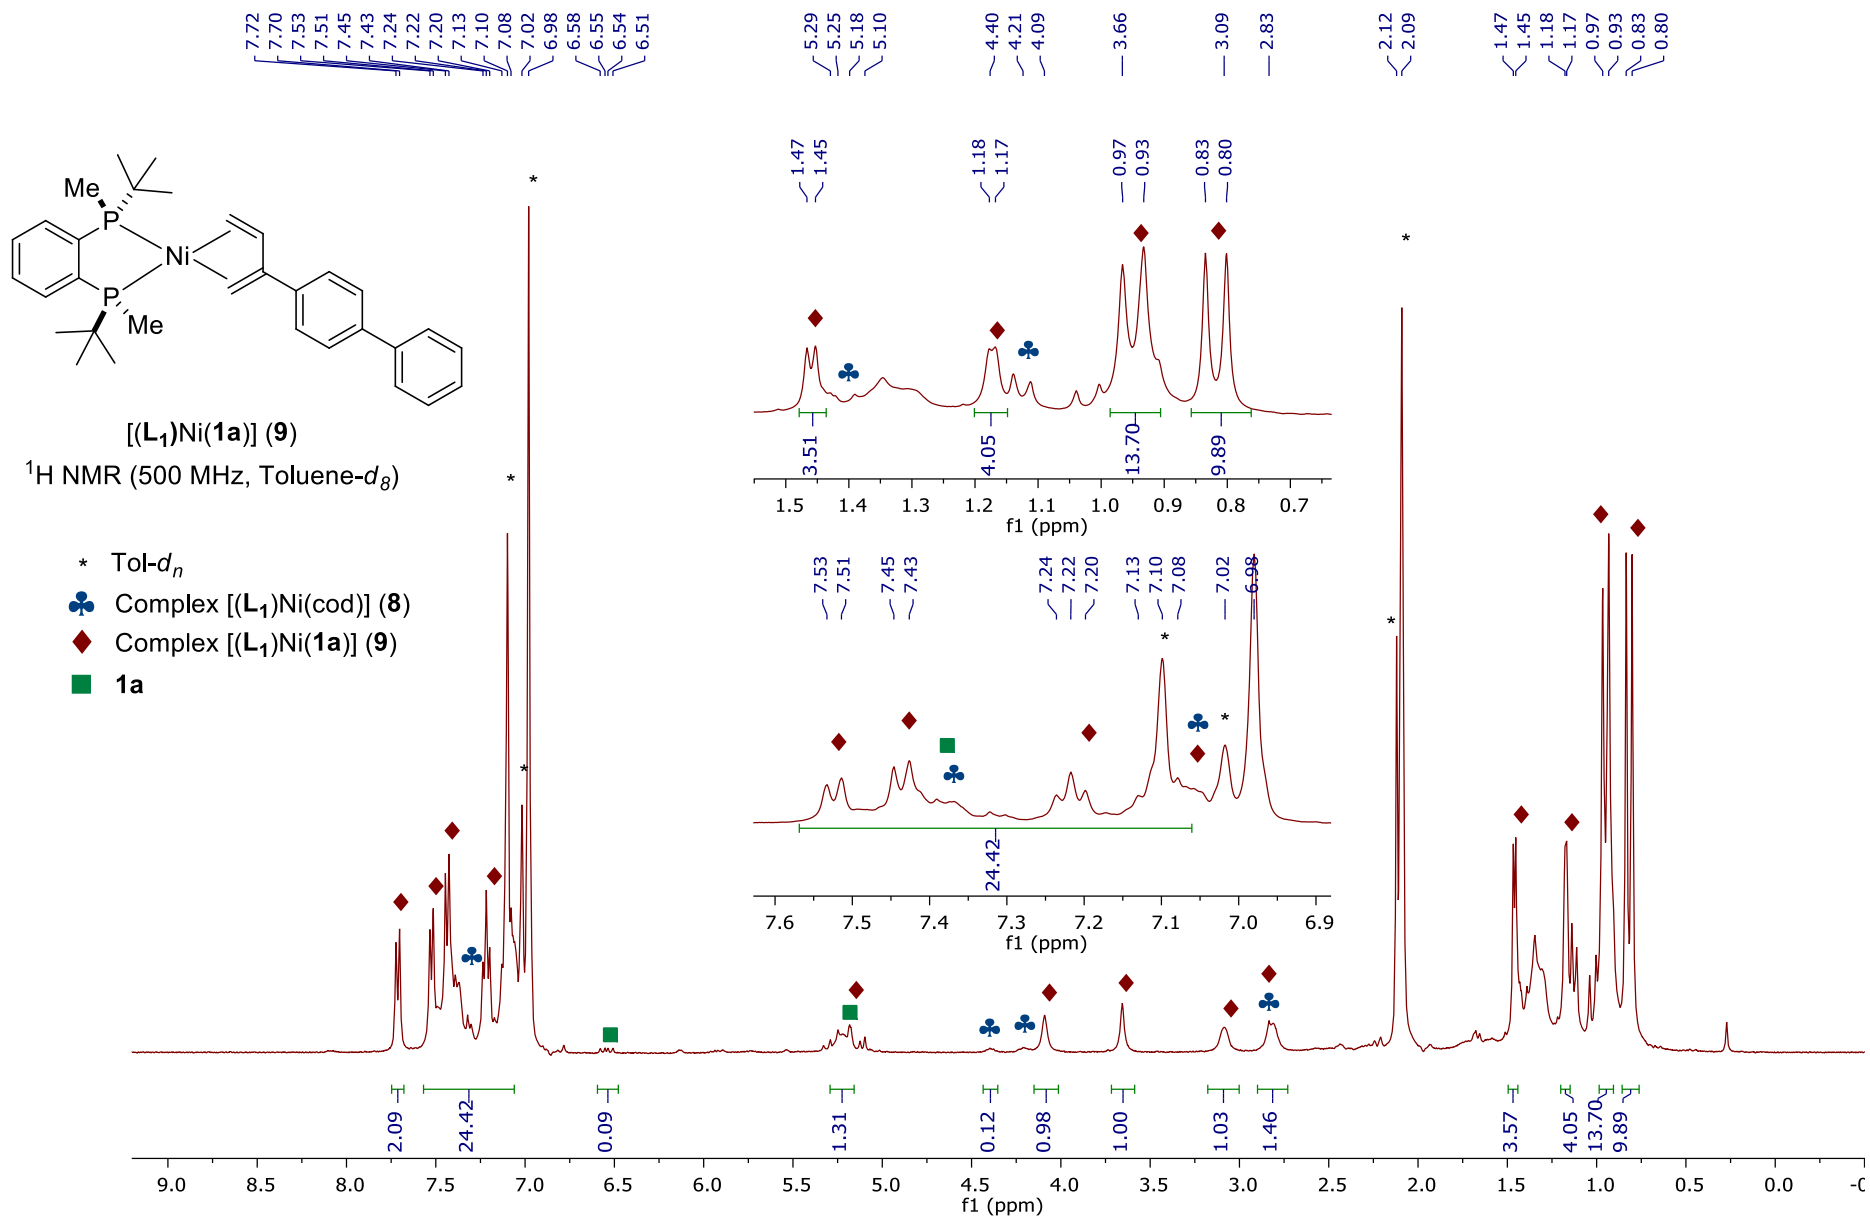

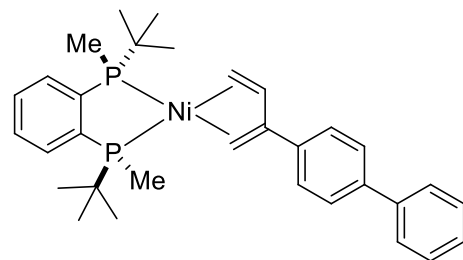

**$[(L_1)Ni(1a)]$  (9)**

$^{13}C\{^1H\}$  NMR (130 MHz, Toluene- $d_8$ )

\* Tol- $d_8$

♣ Complex  $[(L_1)Ni(cod)]$  (8)

◆ Complex  $[(L_1)Ni(1a)]$  (9)

■ 1a

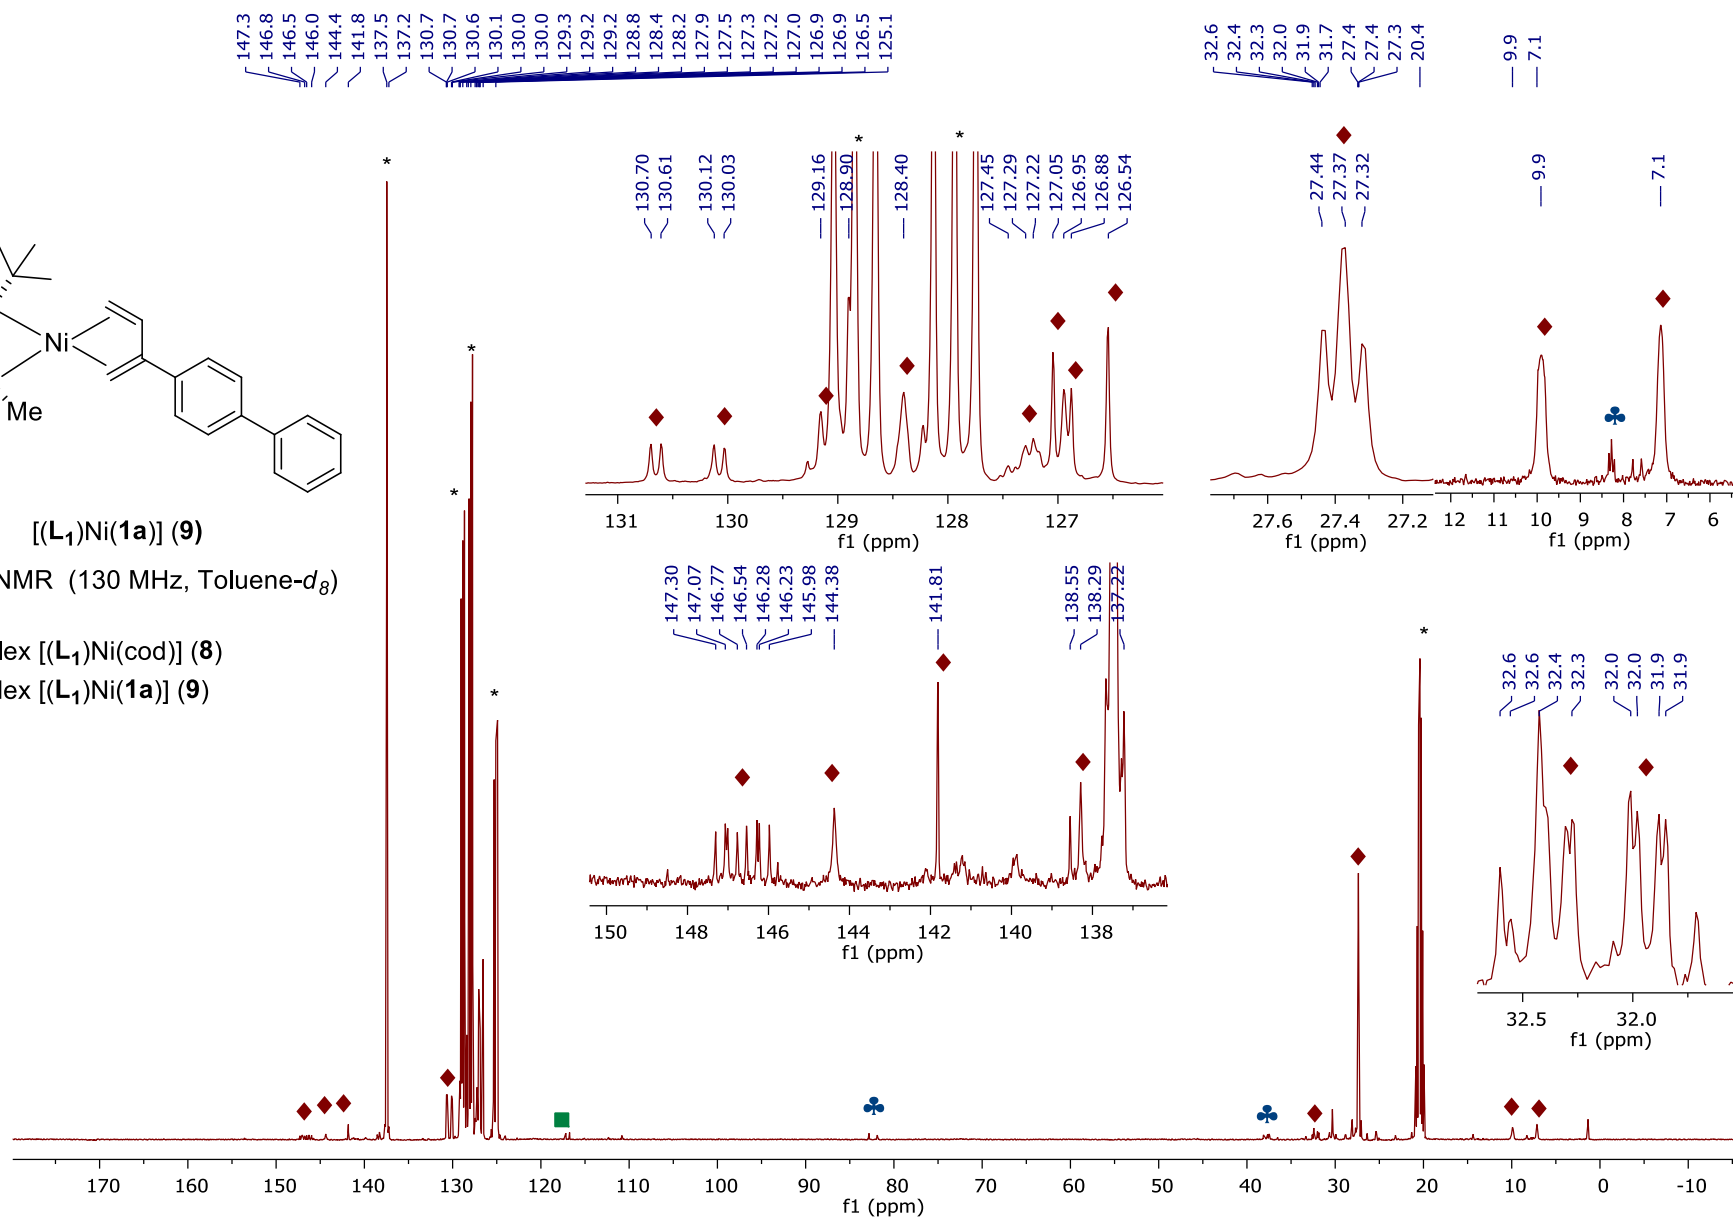

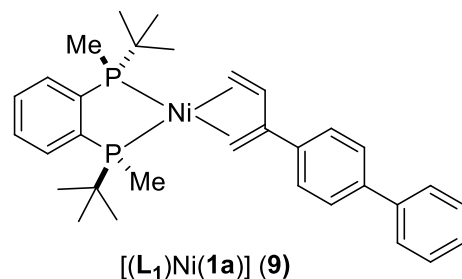

<sup>31</sup>P NMR (160 MHz, Toluene-*d*<sub>8</sub>)

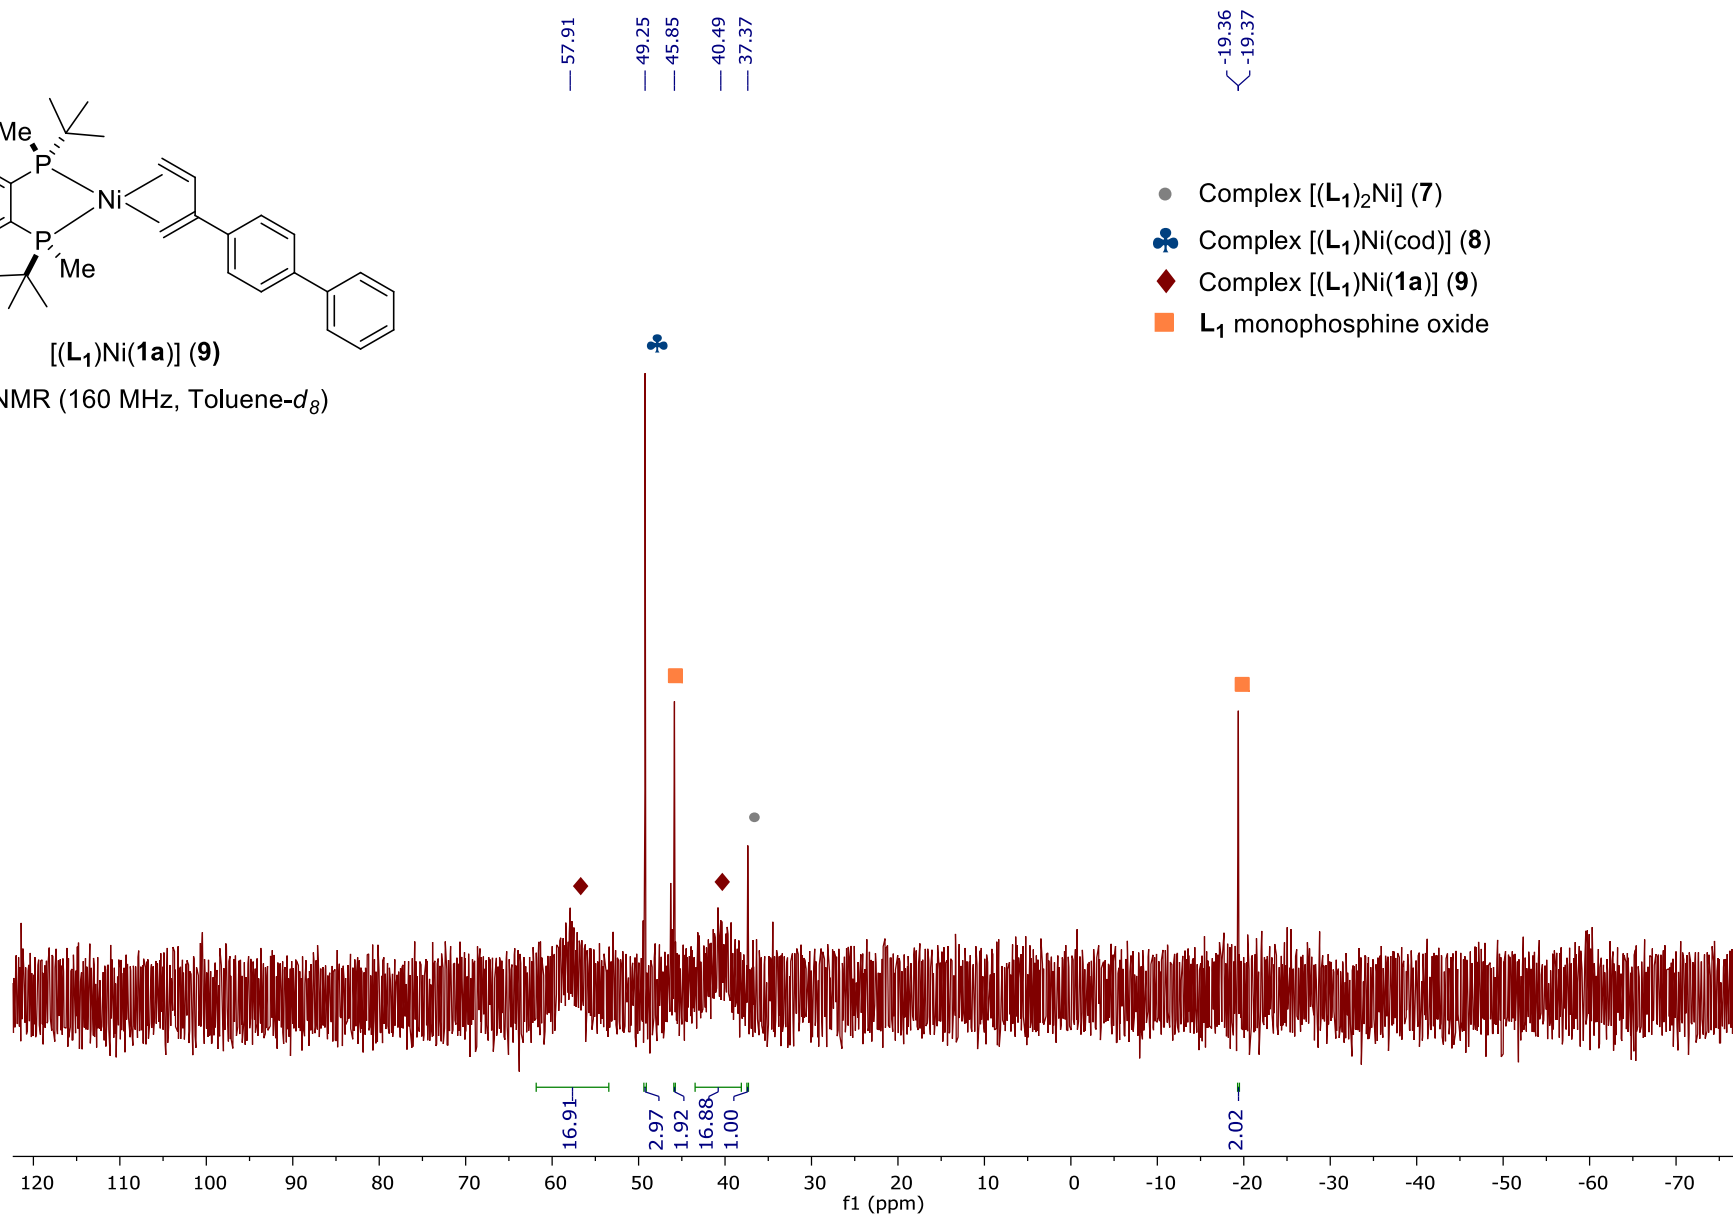



$[(L_1)Ni(1a)]$  (**9**)  
 $^{31}P$  NMR (120 MHz, Toluene- $d_8$ )  
Variable temperature (168 to 298 K)

♣ Complex  $[(L_1)Ni(cod)]$  (**8**)  
◆ Complex  $[(L_1)Ni(1a)]$  (**9**)  
■  $L_1$  monophosphine oxide

T = 168 K

T = 173 K

T = 183 K

T = 193 K

T = 202 K

T = 298 K

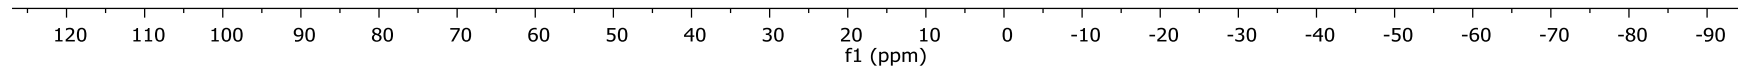

S157

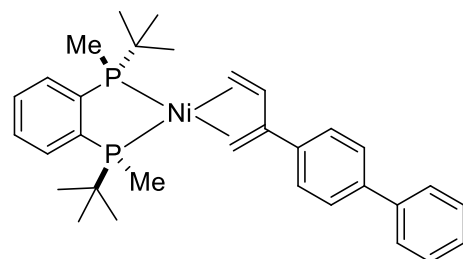

**$[(L_1)Ni(1a)]$  (9)**

$^{31}P$  NMR (120 MHz, Toluene- $d_8$ )  
T = 168 K

- ♣ Complex  $[(L_1)Ni(cod)]$  (8)
- ◆ Complex  $[(L_1)Ni(1a)]$  (9)
- $L_1$  monophosphine oxide

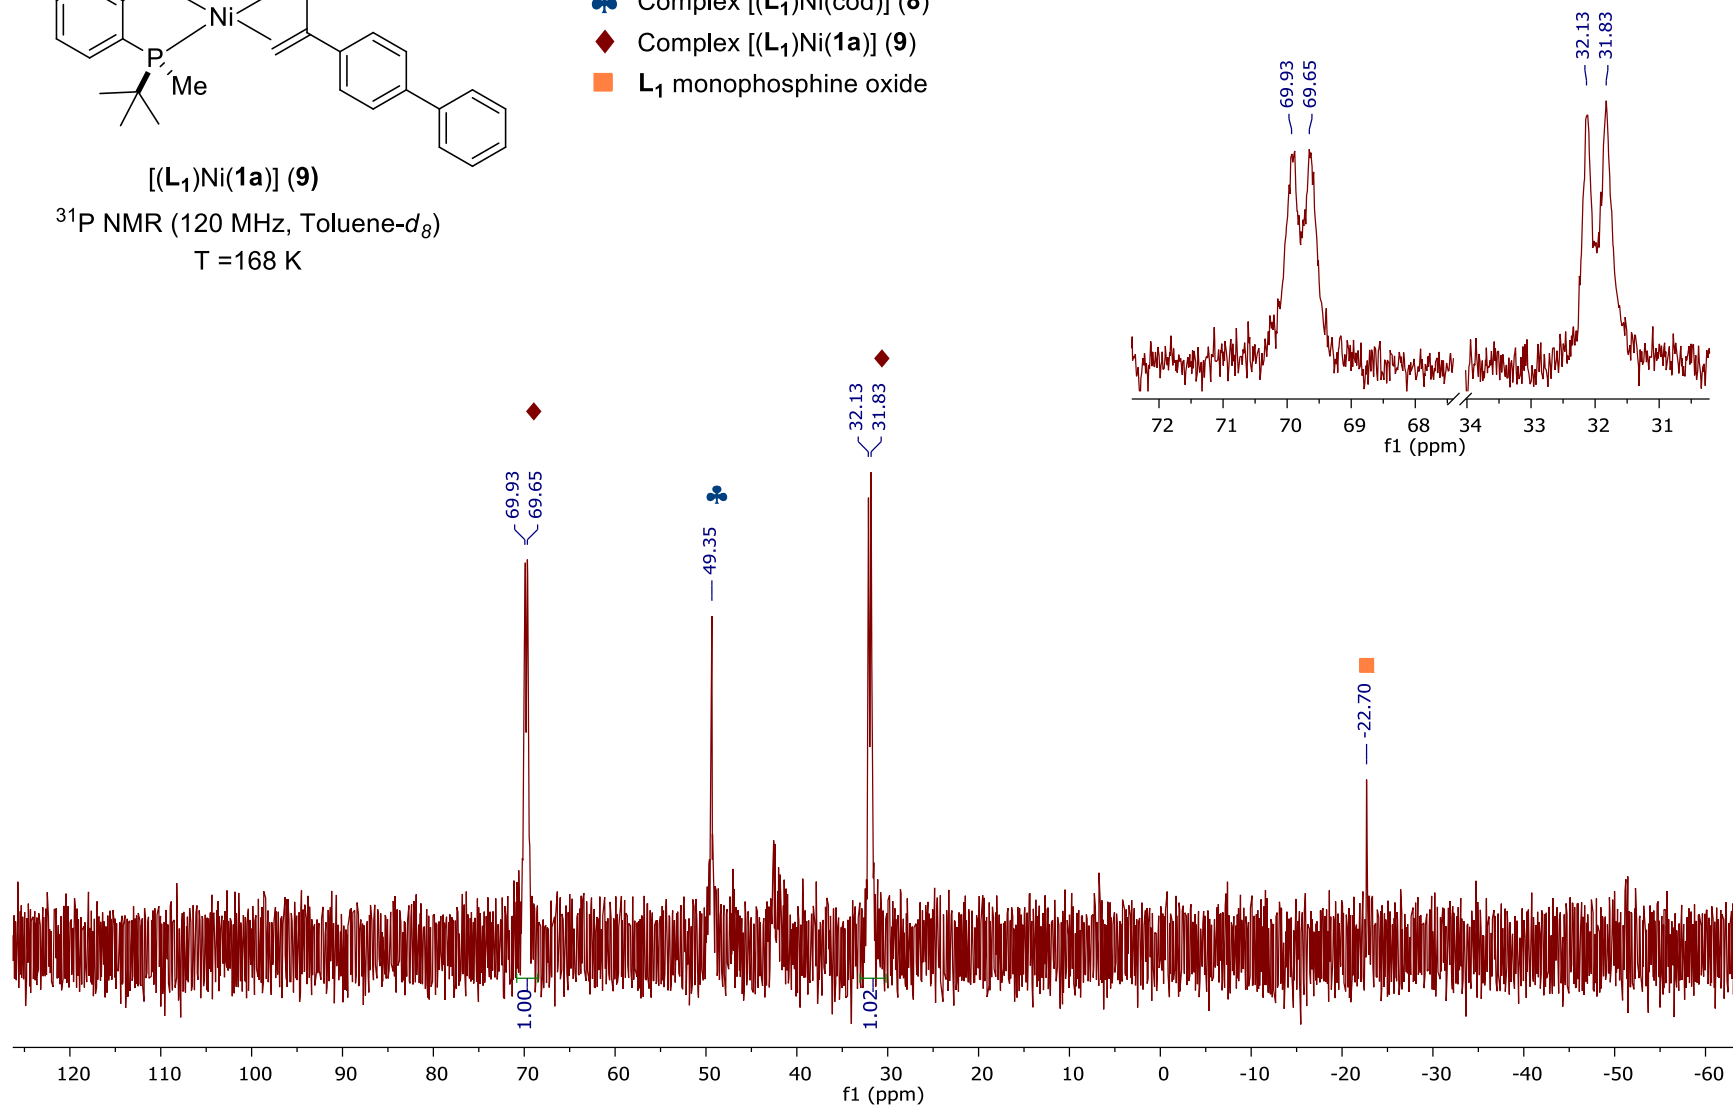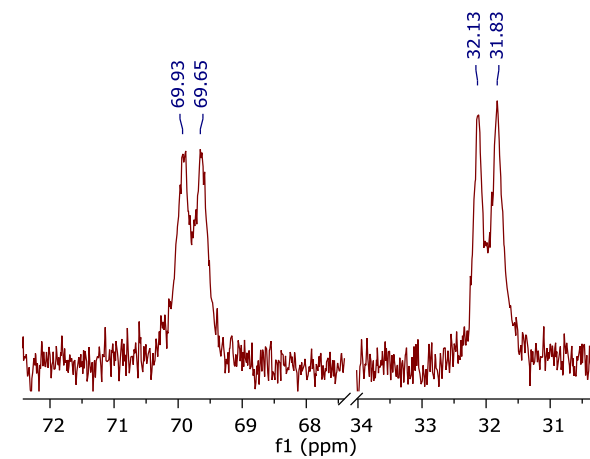

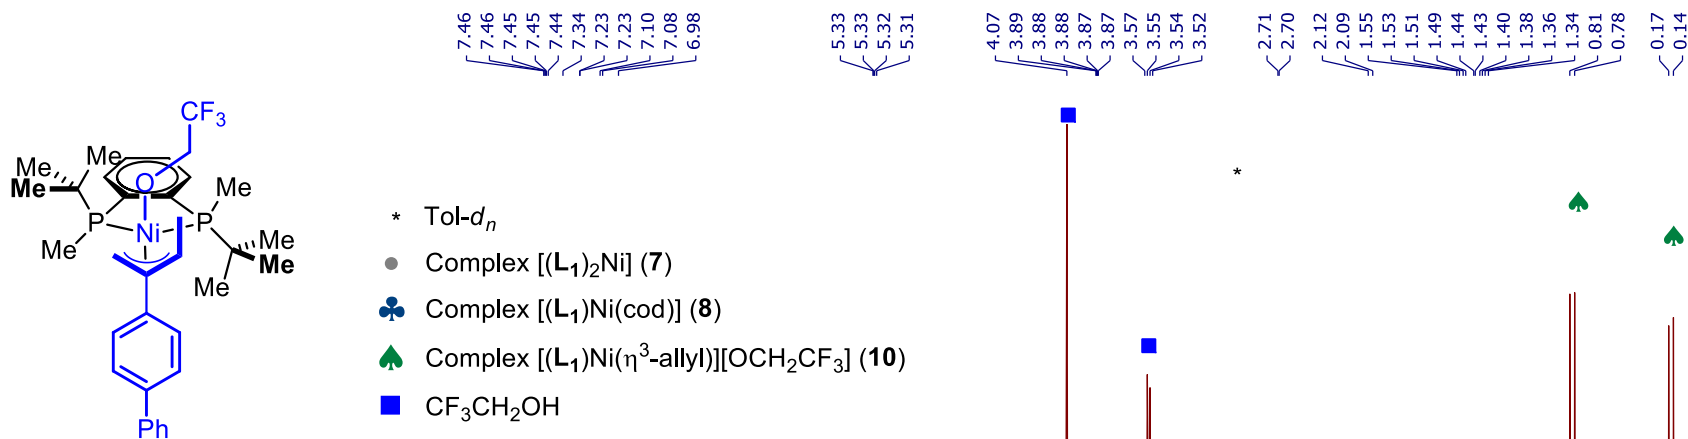

$[(L_1)Ni(\eta^3\text{-allyl})][OCH_2CF_3]$  (10)  
 $^1H$  NMR (500 MHz, Toluene- $d_8$ )

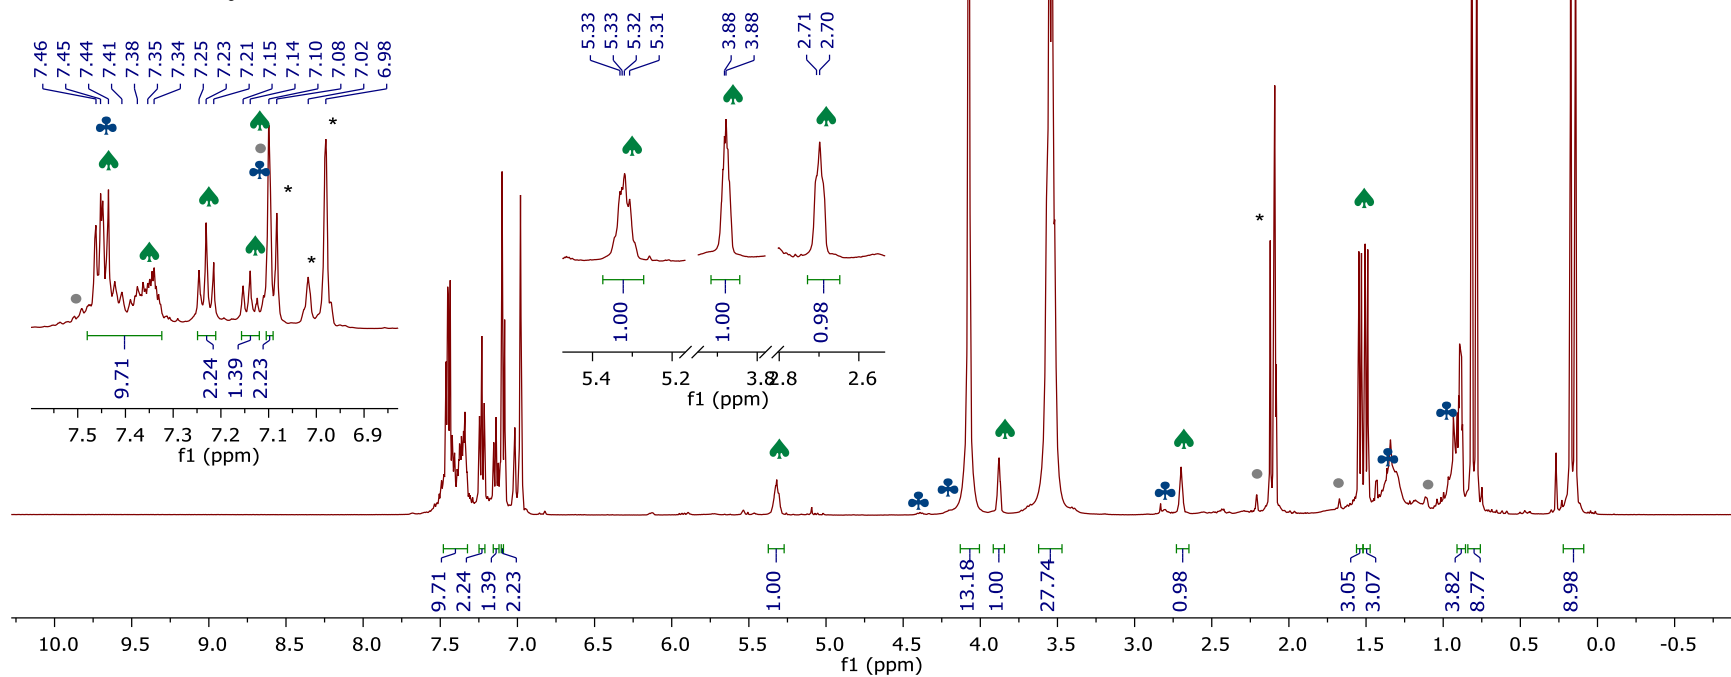

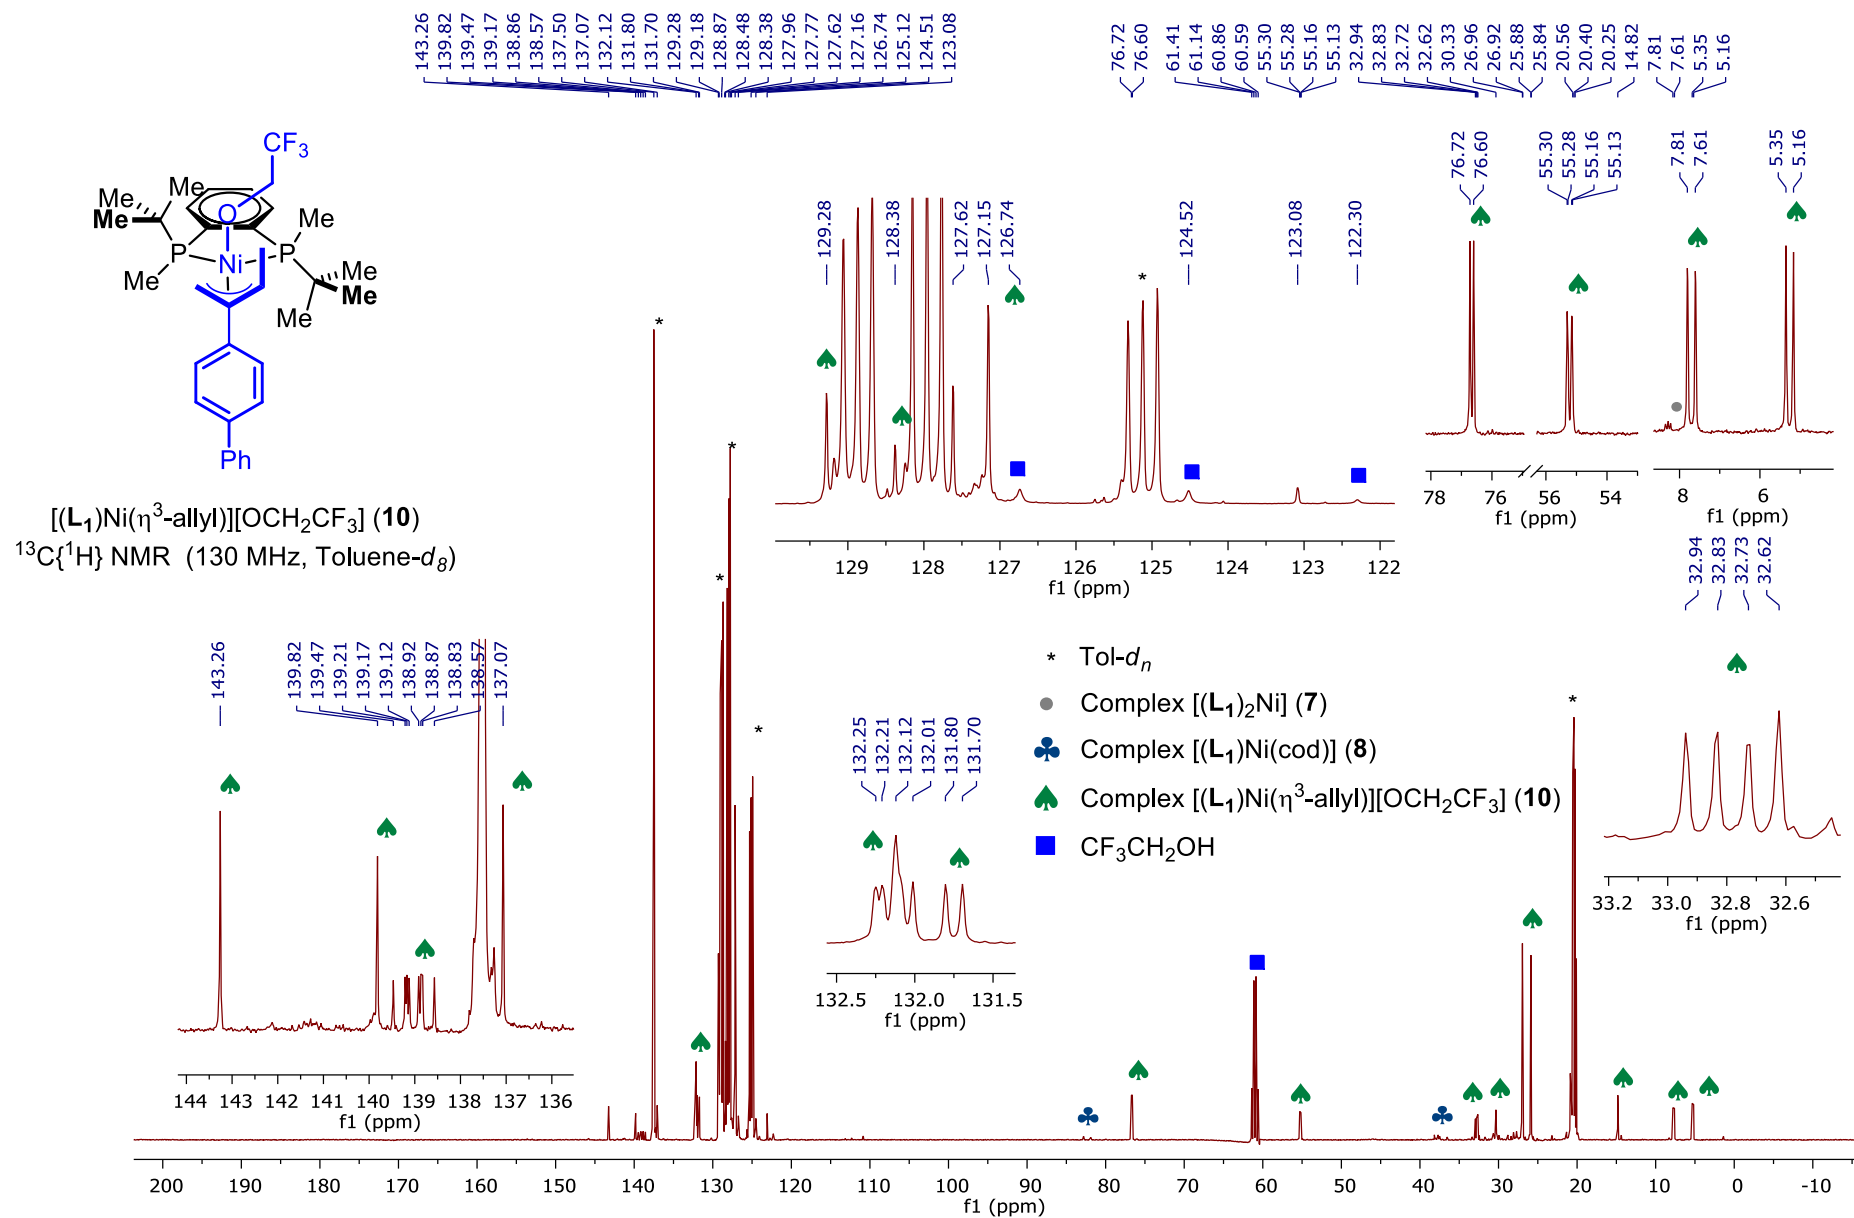

61.55  
61.47  
58.62  
58.54  
49.27  
37.37

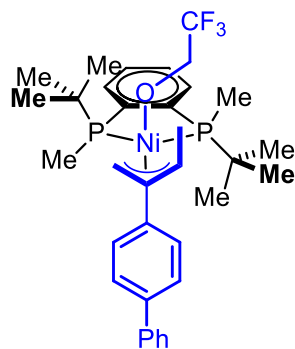

[(L<sub>1</sub>)Ni(η<sup>3</sup>-allyl)][OCH<sub>2</sub>CF<sub>3</sub>] (**10**)  
<sup>31</sup>P NMR (160 MHz, Toluene-*d*<sub>8</sub>)

- Complex [(L<sub>1</sub>)<sub>2</sub>Ni] (**7**)
- ♣ Complex [(L<sub>1</sub>)Ni(cod)] (**8**)
- ♠ Complex [(L<sub>1</sub>)Ni(η<sup>3</sup>-allyl)][OCH<sub>2</sub>CF<sub>3</sub>] (**10**)

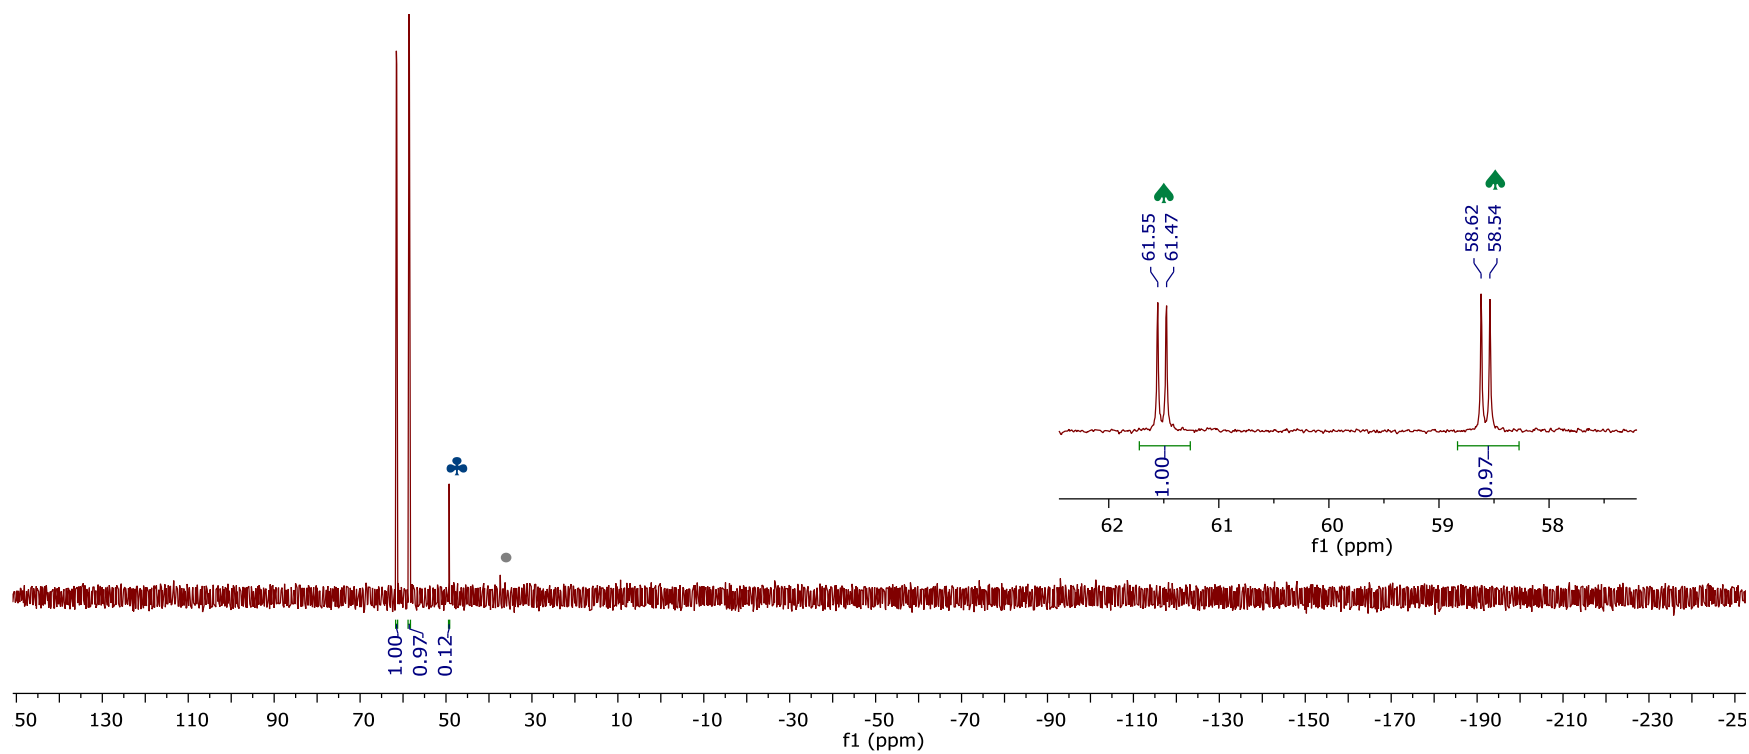

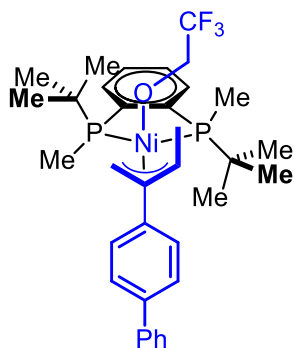

$[(L_1)Ni(\eta^3\text{-allyl})][OCH_2CF_3]$  (**10**)

$^{19}F\{^1H\}$  NMR (280 MHz, Toluene- $d_8$ )

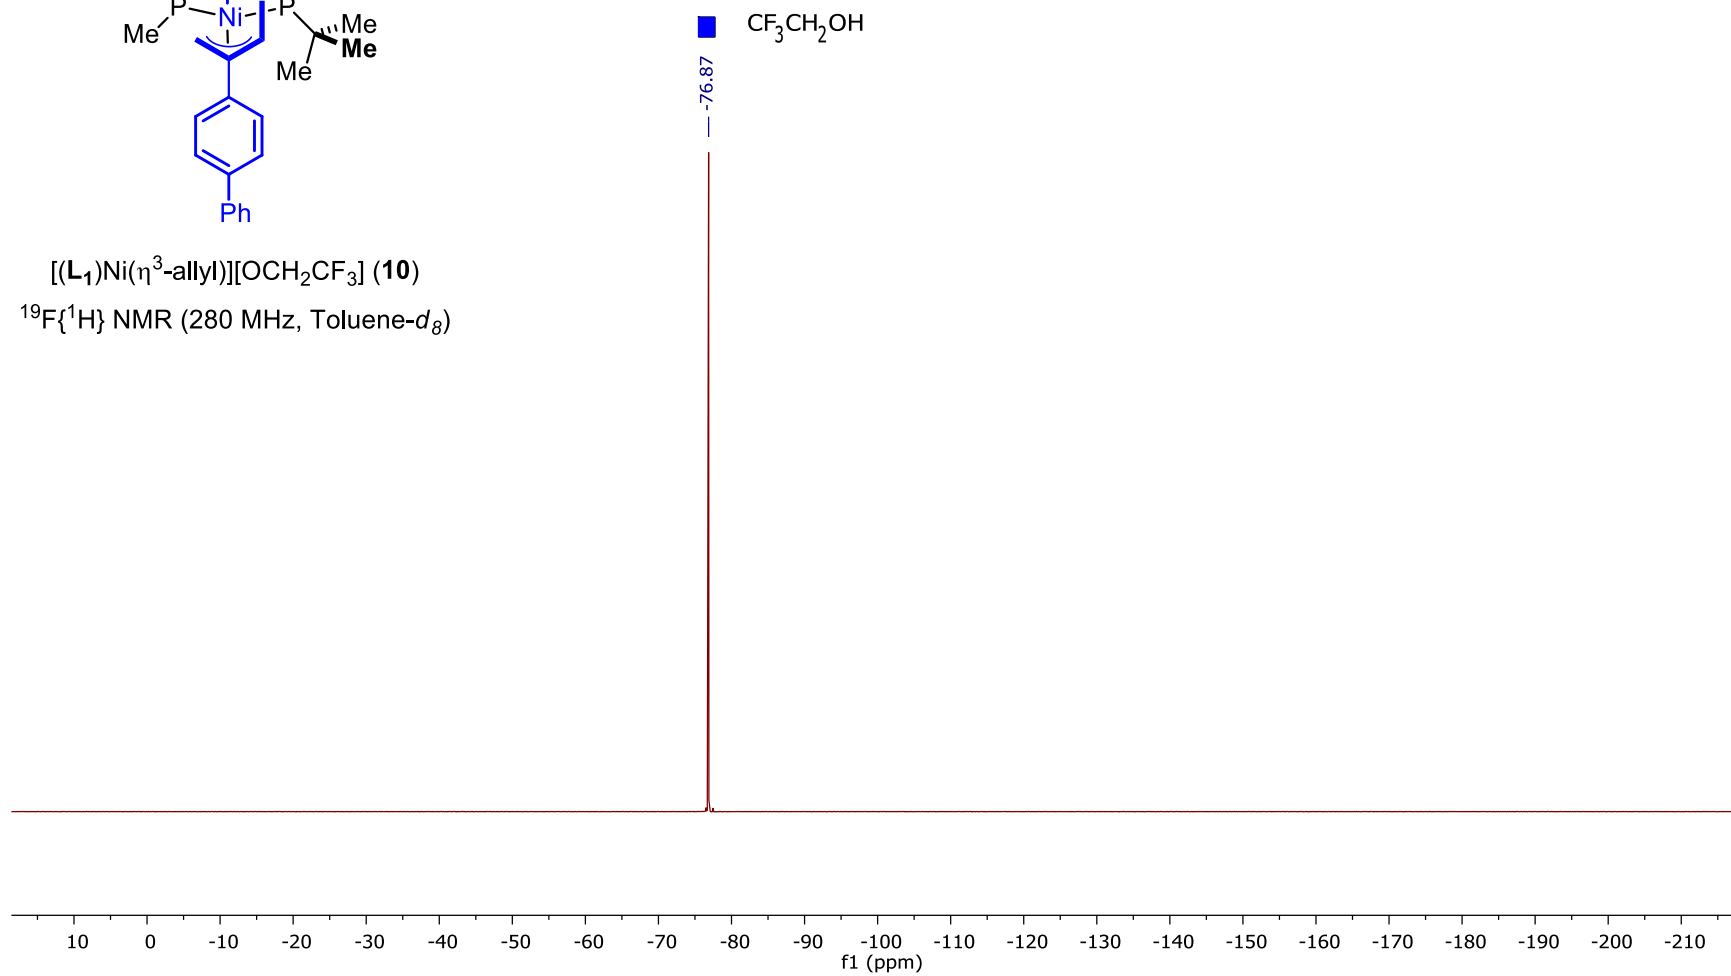

S162

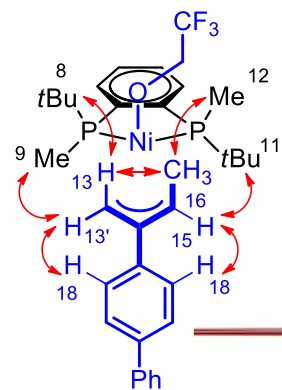

[(L<sub>1</sub>)Ni(η<sup>3</sup>-allyl)][OCH<sub>2</sub>CF<sub>3</sub>] (**10**)  
2D-NOESY (500 MHz, Toluene-*d*<sub>8</sub>)

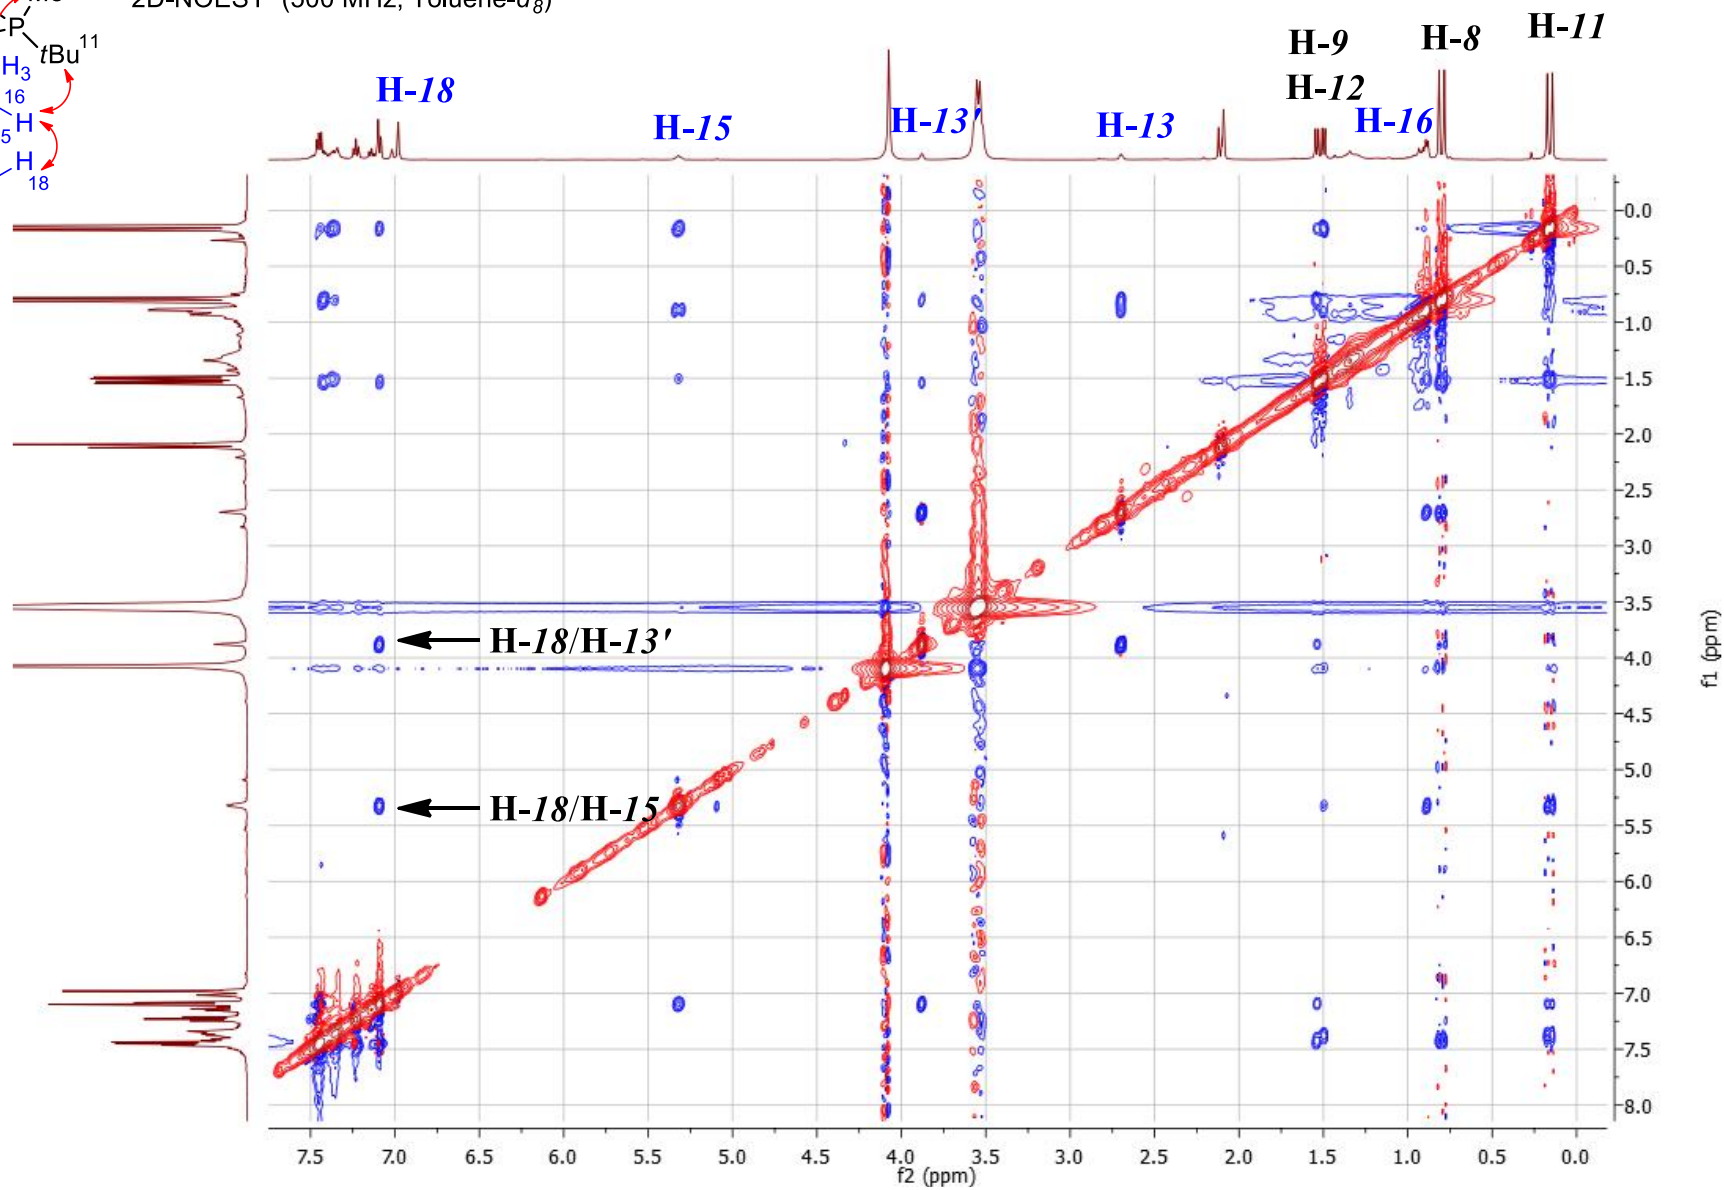

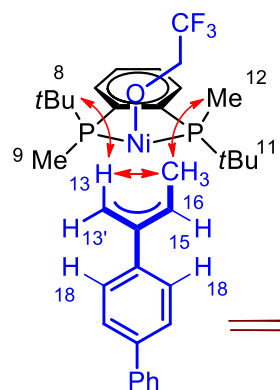

[(**L**<sub>1</sub>)Ni( $\eta^3$ -allyl)][OCH<sub>2</sub>CF<sub>3</sub>] (**10**)  
2D-NOESY (500 MHz, Toluene-*d*<sub>8</sub>)

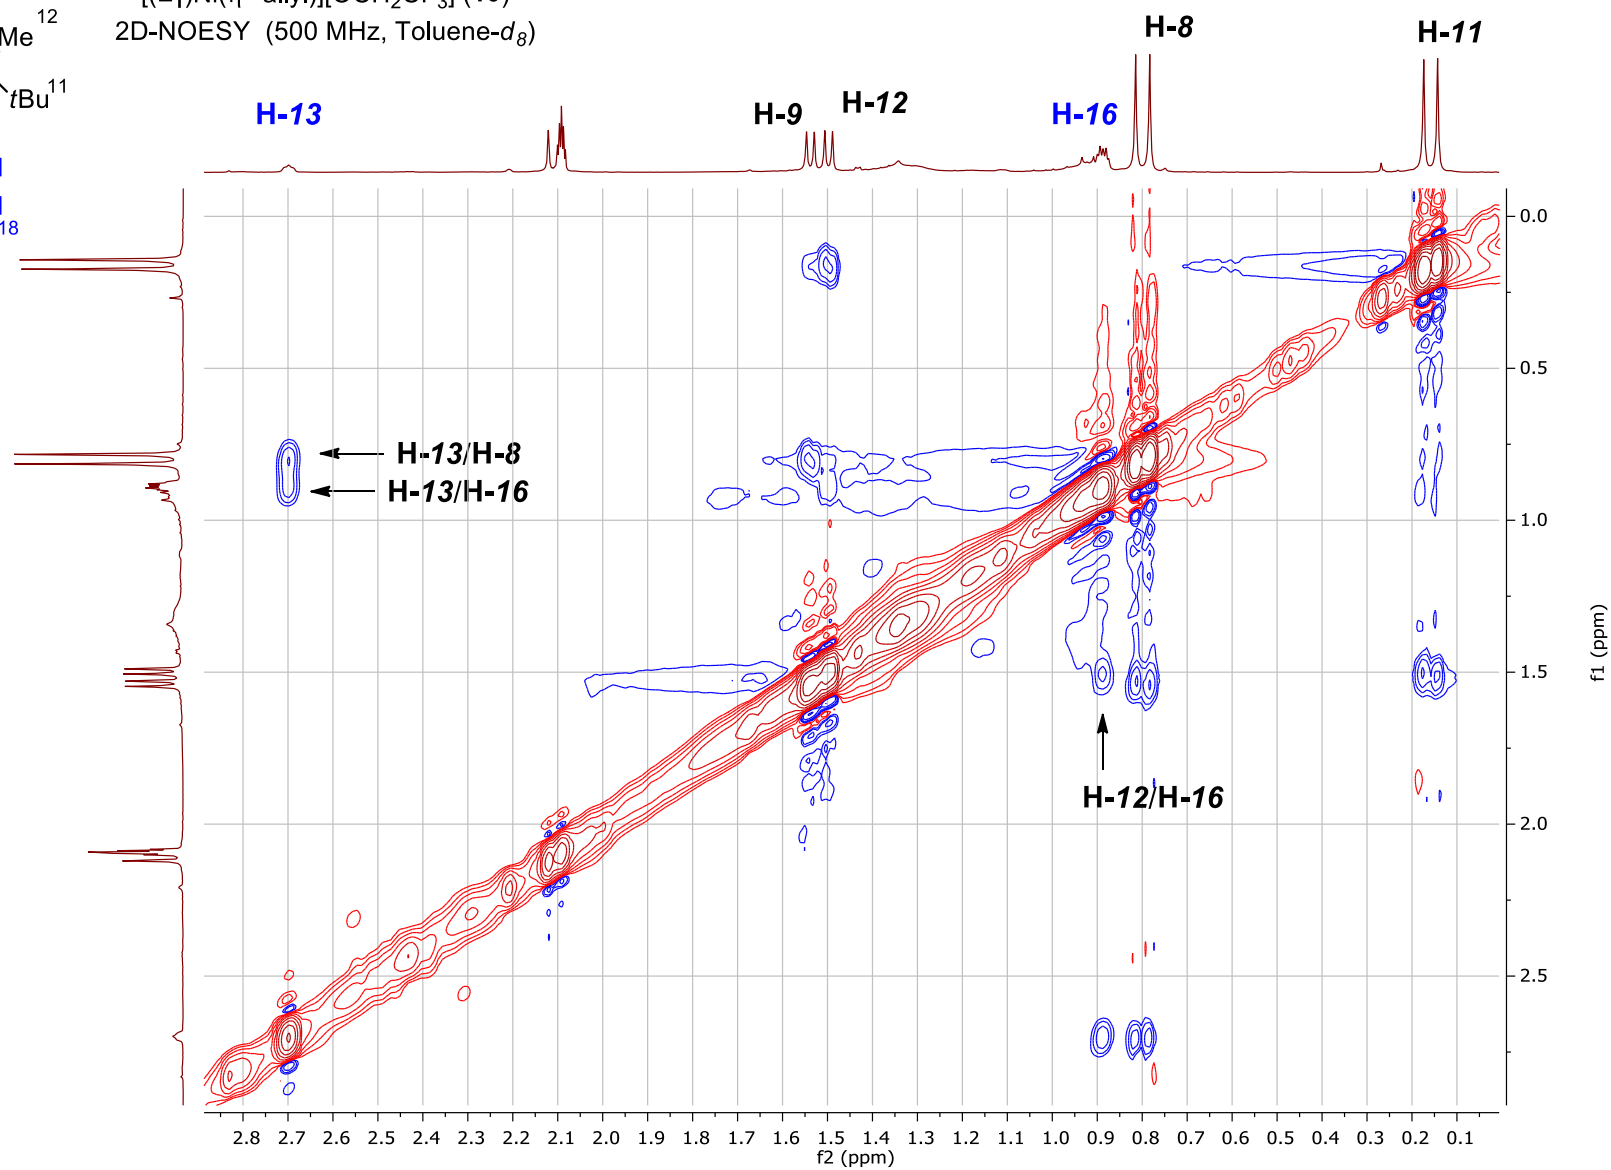



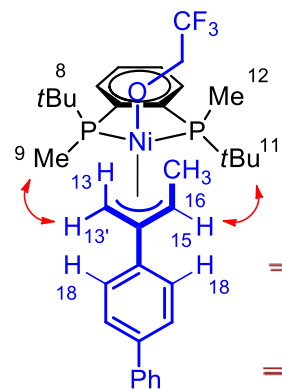

[(**L**<sub>1</sub>)Ni(η<sup>3</sup>-allyl)][OCH<sub>2</sub>CF<sub>3</sub>] (**10**)  
2D-NOESY (500 MHz, Toluene-*d*<sub>8</sub>)

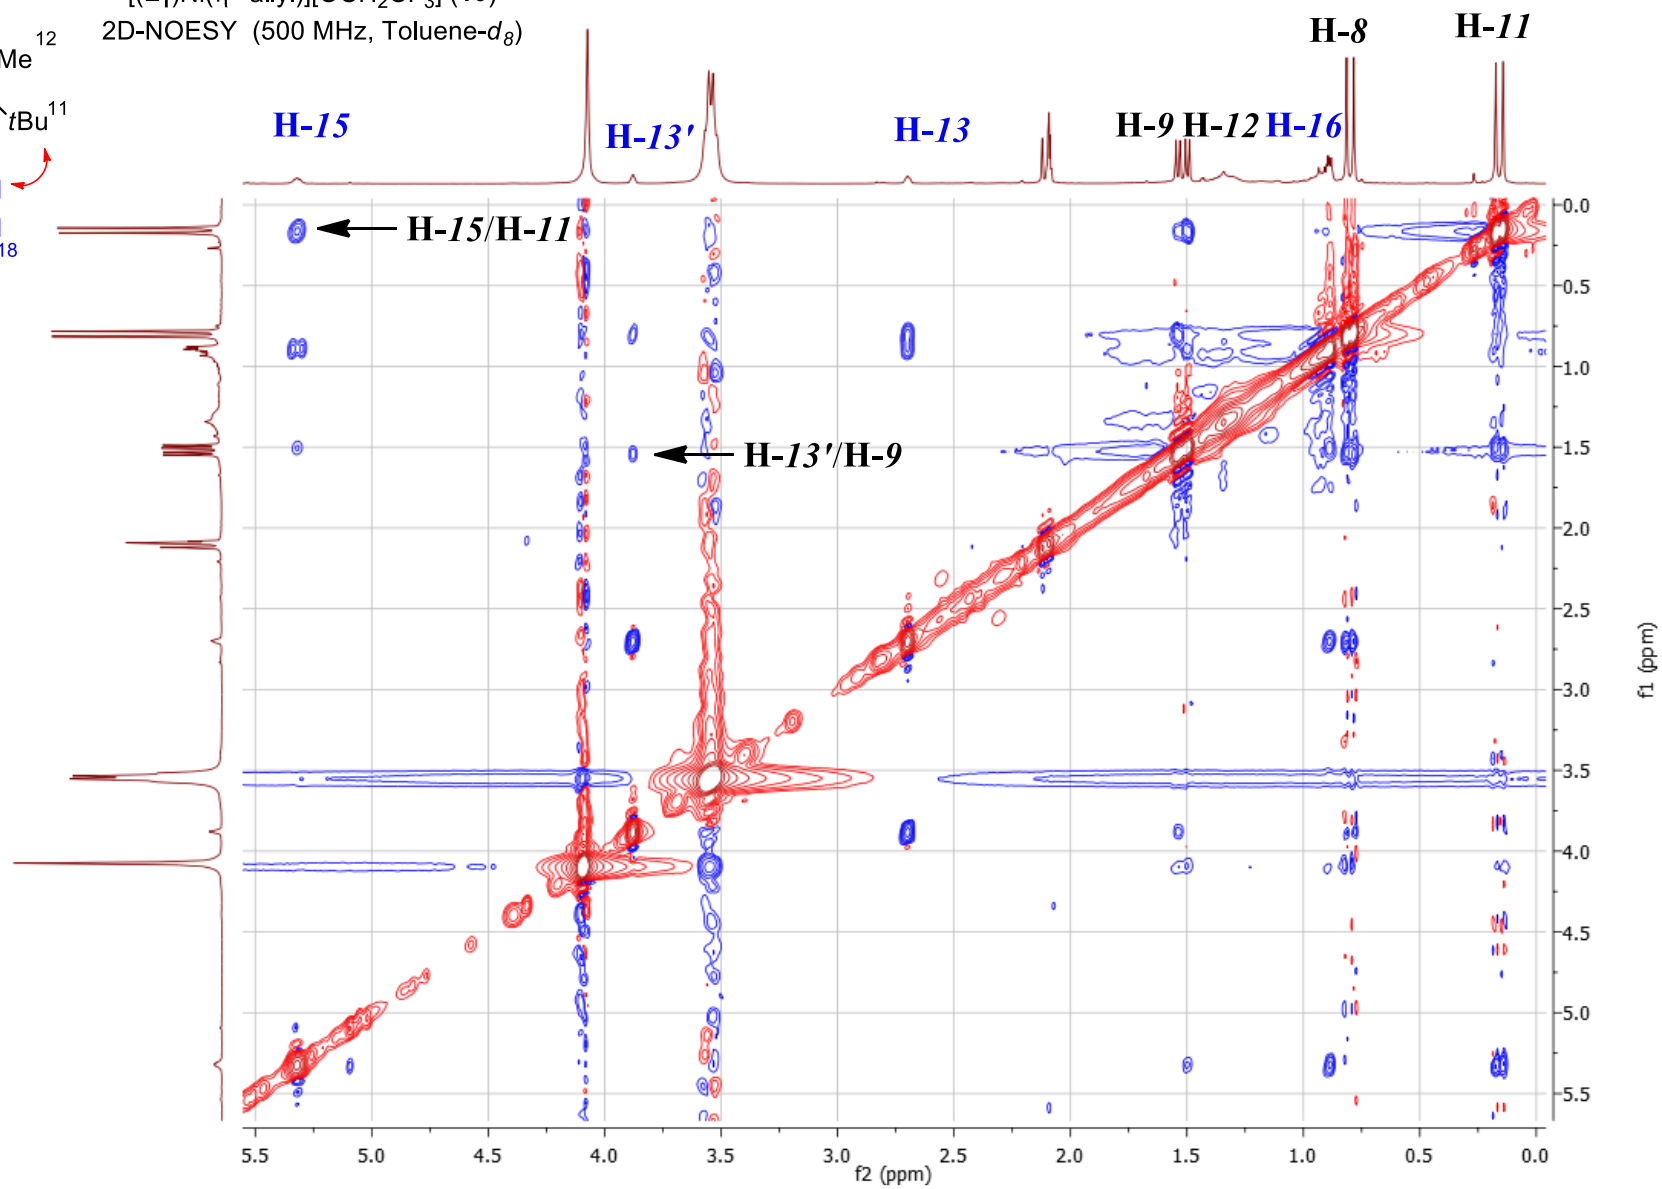

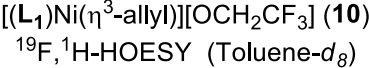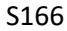

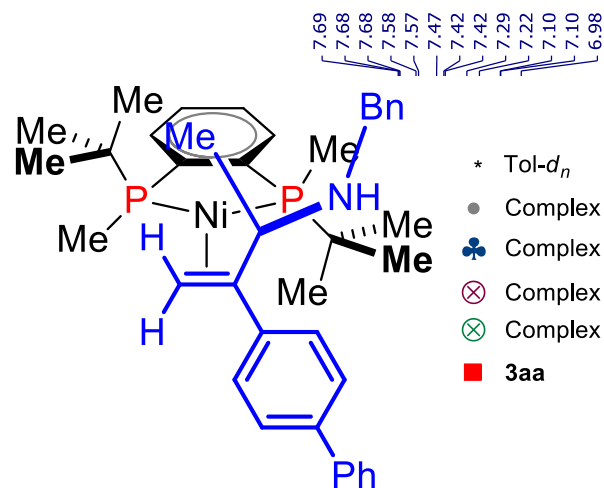

$[(L_1)Ni(3aa)]$  (**11-major**)

$^1H$  NMR (500 MHz, Toluene- $d_8$ )

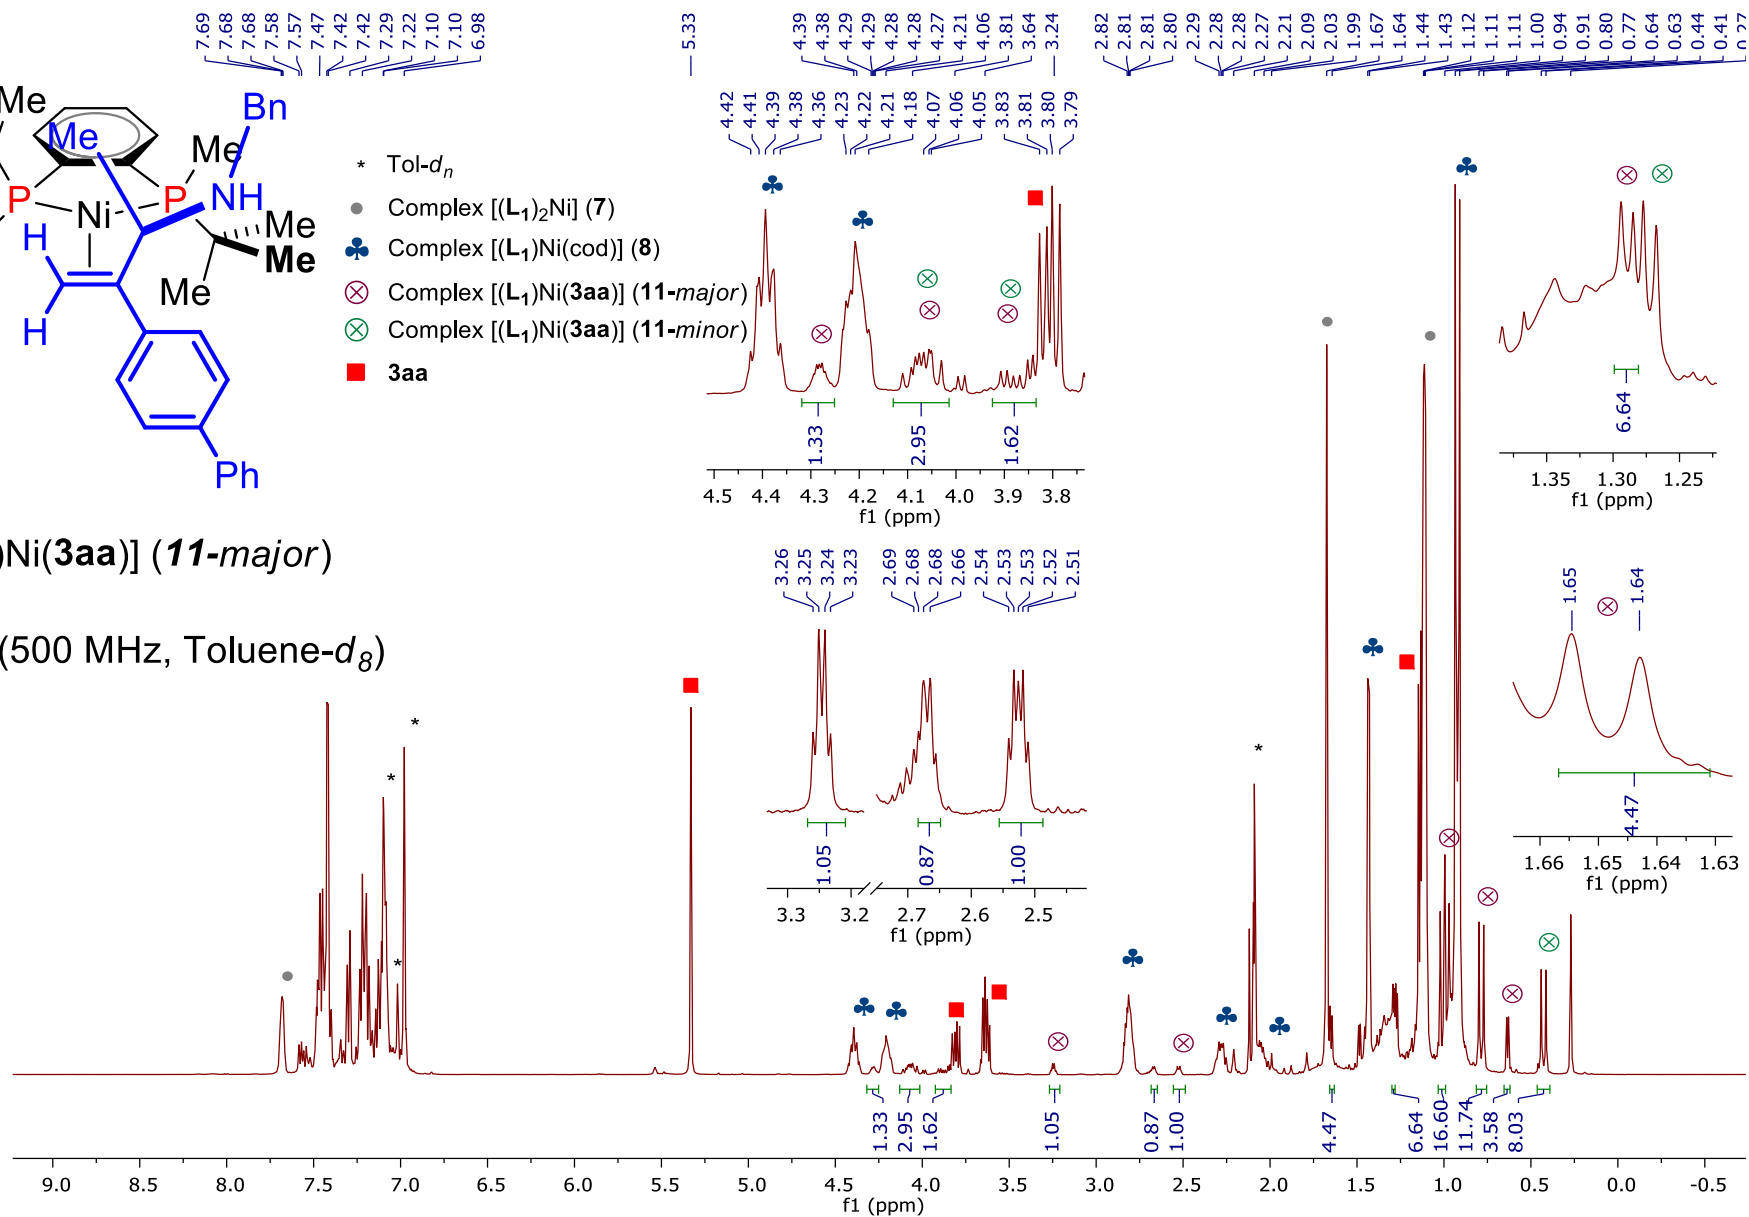



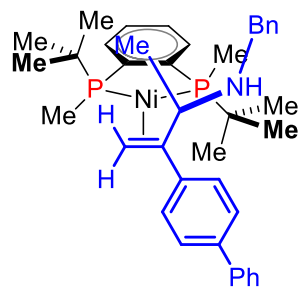

$[(L_1)Ni(3aa)]$  (**11-major**)

$^{13}C\{^1H\}$  NMR (130 MHz, Toluene- $d_8$ )

- Complex  $[(L_1)_2Ni]$  (**7**)
- ♣ Complex  $[(L_1)Ni(cod)]$  (**8**)
- ⊗ Complex  $[(L_1)Ni(3aa)]$  (**11-major**)
- ⊗ Complex  $[(L_1)Ni(3aa)]$  (**11-minor**)

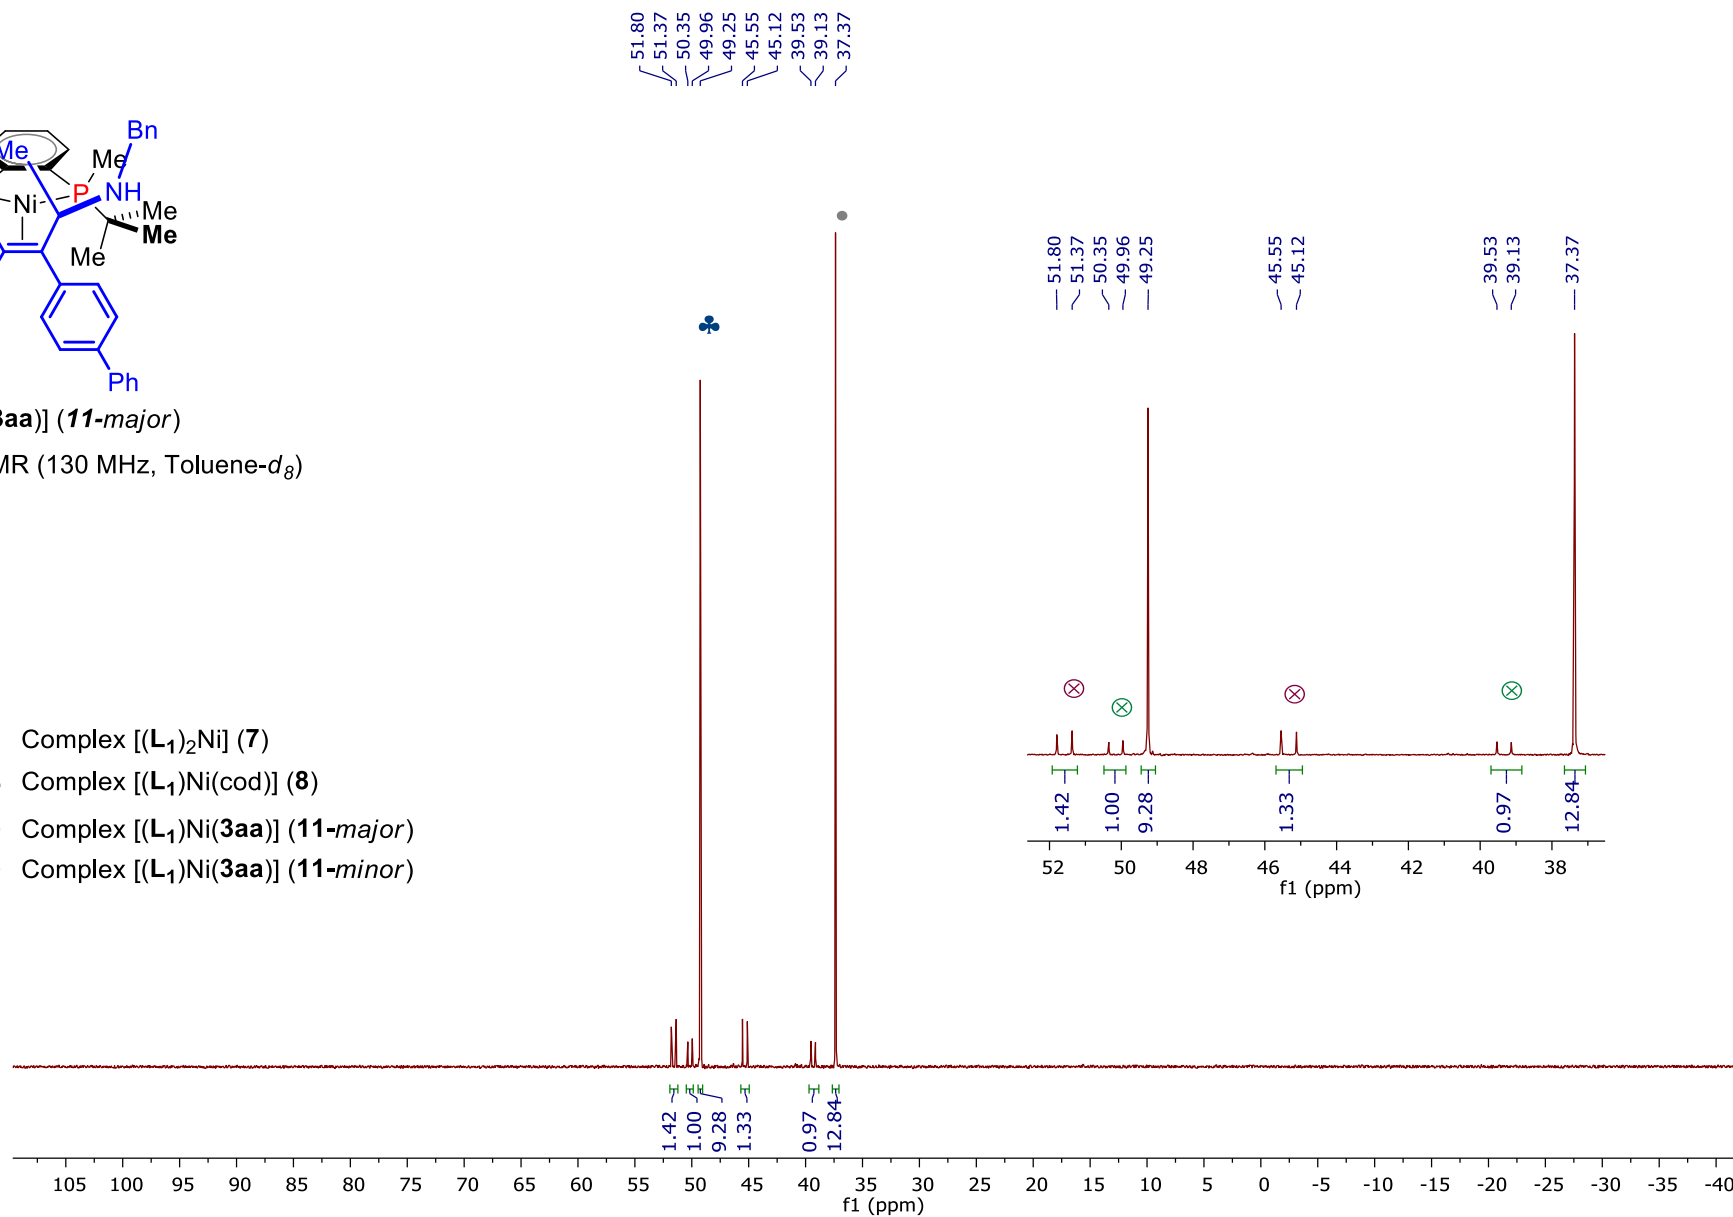

## 14. X-Ray analysis

All data were collected on an Agilent Supernova diffractometer equipped with an ATLAS CCD detector using Cu radiation. The crystal was kept at 180.01(10) K during data collection. Using Olex2, the structure was solved with the ShelXT structure solution program using Intrinsic Phasing and refined with the ShelXL refinement package using Least Squares minimization.<sup>5</sup> Crystallographic data are found in **Table S3**.

|                                               |                                                               |
|-----------------------------------------------|---------------------------------------------------------------|
| Identification code                           | <b>3aa</b>                                                    |
| CCDC                                          | 1938704                                                       |
| Empirical formula                             | $C_{23}H_{24}ClN$                                             |
| Formula weight                                | 349.88                                                        |
| Temperature/K                                 | 180.01(10)                                                    |
| Crystal system                                | monoclinic                                                    |
| Space group                                   | $P2_1$                                                        |
| $a/\text{\AA}$                                | 10.48643(15)                                                  |
| $b/\text{\AA}$                                | 7.50634(11)                                                   |
| $c/\text{\AA}$                                | 12.56284(19)                                                  |
| $\alpha/^\circ$                               | 90                                                            |
| $\beta/^\circ$                                | 91.0457(13)                                                   |
| $\gamma/^\circ$                               | 90                                                            |
| Volume/ $\text{\AA}^3$                        | 988.72(2)                                                     |
| Z                                             | 2                                                             |
| $\rho_{\text{calc}}/\text{g/cm}^3$            | 1.175                                                         |
| $\mu/\text{mm}^{-1}$                          | 1.719                                                         |
| $F(000)$                                      | 372.0                                                         |
| Crystal size/ $\text{mm}^3$                   | $0.957 \times 0.155 \times 0.076$                             |
| Radiation                                     | $\text{CuK}\alpha$ ( $\lambda = 1.54184$ )                    |
| $2\theta$ range for data collection/ $^\circ$ | 7.038 to 141.102                                              |
| Index ranges                                  | $-12 \leq h \leq 12, -9 \leq k \leq 9, -15 \leq l \leq 15$    |
| Reflections collected                         | 15843                                                         |
| Independent reflections                       | 3737 [ $R_{\text{int}} = 0.0315, R_{\text{sigma}} = 0.0208$ ] |
| Data/restraints/parameters                    | 3737/1/236                                                    |
| Goodness-of-fit on $F^2$                      | 1.033                                                         |
| Final R indexes [ $ I  \geq 2\sigma(I)$ ]     | $R_1 = 0.0278, wR_2 = 0.0705$                                 |
| Final R indexes [all data]                    | $R_1 = 0.0298, wR_2 = 0.0718$                                 |
| Largest diff. peak/hole / $e \text{\AA}^{-3}$ | 0.13/-0.17                                                    |
| Flack parameter                               | -0.012(13)                                                    |

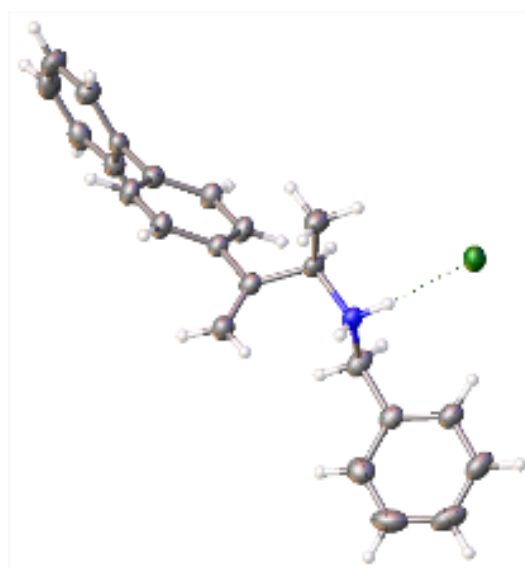

**Table S3.** Crystal structure and data refinement for **3aa**-HCl salt (CCDC 1938704)

## 15. References

- <sup>1</sup> Fiorito, D.; Folliet, S.; Liu, Y.; Mazet, C. A General Nickel-Catalyzed Kumada Vinylation for the Preparation of 2-Substituted 1,3-Dienes *ACS Catal.* **2018**, *8*, 1392.
- <sup>2</sup> Doi, H. ; Sakai, T. ; Yamada, K.-I. ; Tomioka, K. *N*-Allyl-*N*-*tert*-butyldimethylsilylamine for chiral ligand-controlled asymmetric conjugate addition to *tert*-butyl alkenoates. *Chem. Commun.* **2004**, 1850.
- <sup>3</sup> Burés, J. Variable Time Normalization Analysis: General Graphical Elucidation of Reaction Orders from Concentration Profiles. *Angew. Chem. Int. Ed.* **2016**, *55*, 16084-16087.
- <sup>4</sup> (a) <http://supramolecular.org> (b) Thordarson, P. Determining Association Constants from Titration Experiments in Supramolecular Chemistry. *Chem. Soc. Rev.* **2011**, *40*, 1305. (c) Hibbert, D. B.; Thordarson, P. The Death of the Job Plot, Transparency, Open Science and Online Tools, Uncertainty Estimation Methods and Other Developments in Supramolecular Chemistry Data Analysis. *Chem. Commun.* **2016**, *52*, 12792. (d) Fit for 1:1 model: <http://app.supramolecular.org/bindfit/view/4d262417-28b2-4c9b-8a4d-3a9f4f48be85>. (e) Fit for 1:2 model: <http://app.supramolecular.org/bindfit/view/65f19228-fb6e-48a1-9bd1-d8f2f5b5344f>. (f) Fit for 2:1 model: <http://app.supramolecular.org/bindfit/view/d1bb8d30-cf61-4fe6-afe9-b8adbe0af3e8>.
- <sup>5</sup> (a) Dolomanov, O. V.; Bourhis, L. J.; Gildea, R. J; Howard, J.A.K.; Puschmann, H. OLEX2: A Complete Structure Solution, Refinement and Analysis Program. *J. Appl. Cryst.* **2009**, *42*, 339. (b) Sheldrick, G. M. SHELXT - Integrated Space-Group and Crystal-Structure Determination. *Acta Cryst.* **2015**, *A71*, 3. (c) Sheldrick, G. M. Crystal Structure Refinement with SHELXL. *Acta Cryst.* **2015**, *C71*, 3.
